# Supplementary material for: Construction of pyrroles, furans and thiophenes via intramolecular cascade desulfonylative/dehydrogenative cyclization of vinylidenecyclopropanes induced by NXS (X = I or Br)
Source: Royal Society of Chemistry journal article supplement (doi:10.1039/d3sc01542d), 2023-01-01
Supplement: d3sc01542d1.pdf [file d3sc01542d1.pdf]

# Supporting Information

## Construction of pyrroles and furans via intramolecular cascade desulfonylative/dehydrogenative cyclization of vinylidenecyclopropanes induced by NXS (X = I or Br)

Zhe Meng,<sup>[a]</sup> Jun Yan,<sup>[a]</sup> Chao Ning,<sup>[a]</sup> Min Shi<sup>\*,[a,b]</sup> and Yin Wei<sup>\*[b]</sup>

<sup>a</sup> Key Laboratory for Advanced Materials and Institute of Fine Chemicals, Key Laboratory for Advanced Materials and Feringa Nobel Prize Scientist Joint Research Center, School of Chemistry & Molecular Engineering, East China University of Science and Technology, Meilong Road No.130, Shanghai, 200237 (China), <sup>b</sup> State Key Laboratory of Organometallic Chemistry, Center for Excellence in Molecular Synthesis, University of Chinese Academy of Sciences, Shanghai Institute of Organic Chemistry, Chinese Academy of Sciences, 345 Lingling Road, Shanghai 200032, P. R. China. mshi@mail.sioc.ac.cn, weiyin@sioc.ac.cn

### Table of Contents

|     |                                                                                                                                 |       |
|-----|---------------------------------------------------------------------------------------------------------------------------------|-------|
| 1.  | General remarks.....                                                                                                            | S2    |
| 2.  | General procedures for the synthesis of substrates <b>1</b> , <b>5</b> and <b>7</b> .....                                       | S3    |
| 3.  | Optimization of reaction conditions .....                                                                                       | S9    |
| 4.  | General procedure for the synthesis of <b>3</b> , <b>4</b> , <b>6</b> and <b>8</b> .....                                        | S13   |
| 5.  | Control experiment.....                                                                                                         | S15   |
| 6.  | Gram scale reaction .....                                                                                                       | S17   |
| 7.  | Transformation of product <b>3aa</b> .....                                                                                      | S18   |
| 8.  | Spectroscopic data of substrates <b>1</b> , <b>5</b> and <b>7</b> .....                                                         | S23   |
| 9.  | Spectroscopic data of products <b>3</b> , <b>4</b> , <b>6</b> , <b>8</b> , <b>9</b> , <b>11</b> , <b>12</b> , <b>13</b> . ..... | S78   |
| 10. | Computational studies.....                                                                                                      | S163  |
| 11. | X-Ray structures.....                                                                                                           | S1670 |
| 12. | References .....                                                                                                                | S1893 |

## 1. General remarks

$^1\text{H}$ ,  $^{13}\text{C}$  and  $^{19}\text{F}$  NMR spectra were recorded at 400 MHz or 600 MHz, 100 MHz or 150 MHz and 376 MHz, respectively. HRMS spectra were recorded by EI, ESI, FI method. Infrared spectra were recorded on a Perkin-Elmer PE-983 spectrometer with absorption in  $\text{cm}^{-1}$ . Mass spectra were recorded by EI, ESI, and HRMS was measured on an Agilent Technologies 6224 TOF LC/MS instrument and a Waters Micromass GCT Premier. Melting points were determined on a digital melting point apparatus and temperatures were uncorrected. X-ray structure was determined on a Bruker Smart-1000 X-ray Diffraction meter. The employed solvents were dried up by standard methods when necessary. Commercially obtained reagents were used without further purification. All reactions were monitored by TLC plate analysis with silica gel coated plates (Huanghai GF254). Flash column chromatography was performed by using 300-400 mesh silica gel eluting with ethyl acetate and petroleum ether at increased pressure.

## 2. General procedures for the synthesis of substrates 1

Synthesis of substrates **1a-1n**, **1q-1s**, **1r-1y**, and **1aa-1ae**<sup>[1]</sup>

### Step 1

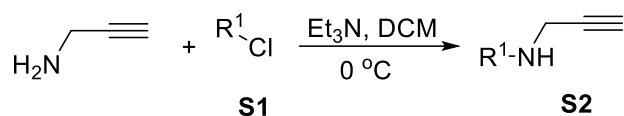

To a solution of **S1** (60 mmol) in DCM (100 mL) was added Et<sub>3</sub>N (90 mmol) and 2-propargylamine (90 mmol) at 0 °C and the resulting solution was allowed to stir at 0 °C for 12 h. Extracted with H<sub>2</sub>O (20 mL × 3), dried over anhydrous Na<sub>2</sub>SO<sub>4</sub>, and filtered, the organic phase was concentrated under reduced pressure to dryness to give a yellow solid **S2**.

### Step 2

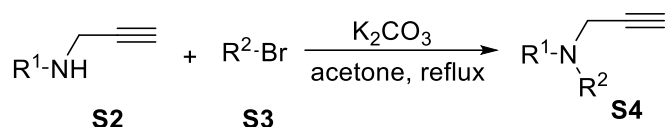

To a solution of **S2** (50 mmol) in acetone (100 mL) was added K<sub>2</sub>CO<sub>3</sub> (1.5 equiv) and **S3** (2.0 equiv). The resulting solution was allowed to stir at 70 °C for 12 h. After filtration, the organic phase was concentrated under reduced pressure and the residue was purified by a flash column chromatography on silica gel to give the desired products **S4** (PE:EA = 10:1).

### Step 3

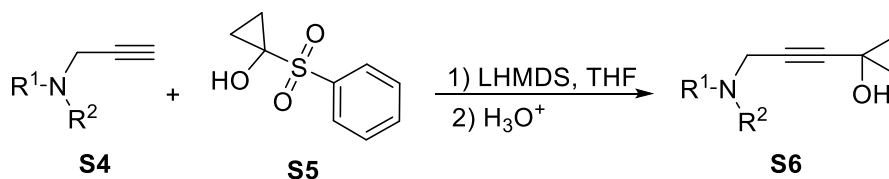

To a solution of compounds **S4** (20 mmol) in THF (30 mL) was slowly added LHMDS (24 mmol, 1.0 M in THF) at -78 °C under the protection of argon and the resulting solution was allowed to stir at -78 °C for 30 min before a solution of **S5** (10 mmol) in THF (10 mL) was added into the above mixture. Consequently, the reaction mixture was allowed to warm up to room temperature and the mixture was left standing overnight. Then, saturated NH<sub>4</sub>Cl solution was added to quench the reaction. Extracted with ethyl acetate, dried over anhydrous Na<sub>2</sub>SO<sub>4</sub>, and filtered, the organic phase

was concentrated under reduce pressure and the residue was purified by a flash column chromatography on silica gel to give the desired products **S6** (PE:EA = 4:1~2:1).

#### Step 4

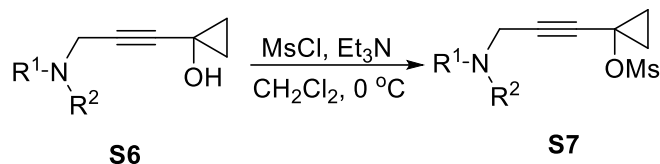

To a solution of **S6** (5.0 mmol) and anhydrous Et<sub>3</sub>N (2.0 equiv) in CH<sub>2</sub>Cl<sub>2</sub> (20 mL) was added MsCl (2.0 equiv) at 0 °C under the protection of argon and the resulting solution was allowed to stir at 0 °C for 1.0 h before some amounts of water were added to quench the reaction. Extracted with CH<sub>2</sub>Cl<sub>2</sub> (20 mL × 3), dried over anhydrous Na<sub>2</sub>SO<sub>4</sub>, and filtered, the organic phase was concentrated under reduce pressure and the residue purified by a flash column chromatography on silica gel to give the desired products **S7** (PE:EA = 2:1).

#### Step 5

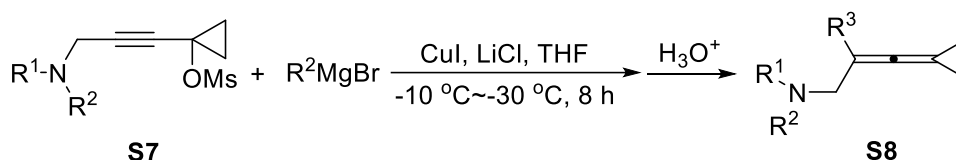

To a flame dried 50 mL three-neck flask was added anhydrous CuI (8.8 mmol), LiCl (8.8 mmol) and the solvent THF (20 mL) under the protection of argon and then, the flask was cooled to -10 °C before the solution of RMgBr or RMgCl (2.0 M, 4.0 mL) was added dropwise into the flask under argon. After 5 minutes, the flask was moved into a -30~-40 °C bath and the reaction mixture was stirred for a while before a solution of **S7** (4.0 mmol) in THF (10 mL) was added dropwise into the above flask. The resulting solution was allowed to stir at -40 °C for 8 h before saturated NH<sub>4</sub>Cl solution was added to quench the reaction. Extracted with EA (20 mL × 3), dried over anhydrous Na<sub>2</sub>SO<sub>4</sub>, and filtered, the organic phase was concentrated under reduce pressure and the residue was purified by a flash column chromatography on silica gel to give the desired products **S8** (PE:EA = 10:1).

#### Synthesis of substrate **1o**

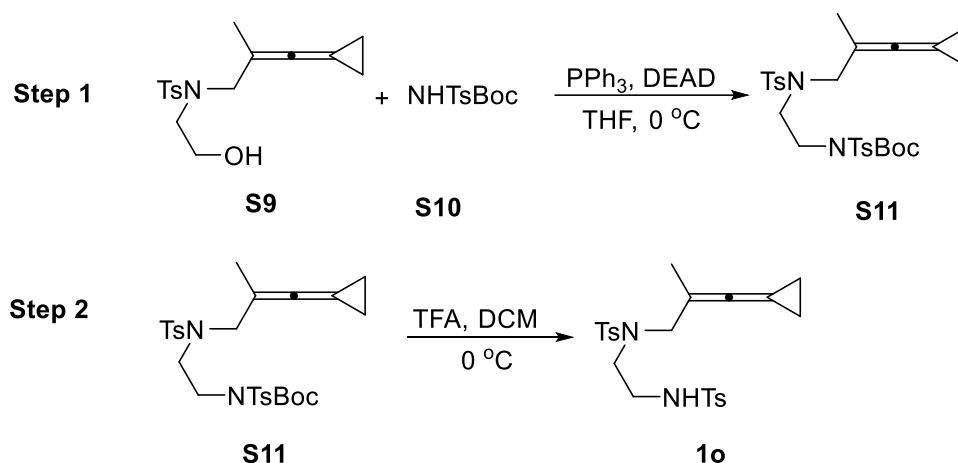

Step 1: To a flame dried 50 mL flask was added **S9** (2 mmol), **S10** (1.2 equiv), PPh<sub>3</sub> (1.2 equiv) and the solvent THF (10 mL) under the protection of argon. Then, the flask was cooled to 0 °C before the DEAD (1.2 equiv) was added dropwise into the flask under argon. The resulting solution was allowed to stir at 0 °C for 12 h before water was added to quench the reaction. Extracted with EA (20 mL × 3), dried over anhydrous Na<sub>2</sub>SO<sub>4</sub>, filtered, the organic phase was concentrated under reduce pressure and the residue was purified by a flash column chromatography on silica gel to give the desired product **S11** (PE:EA = 4:1).

Step 2: To a solution of **S11** (1.0 mmol) in DCM (10 mL) was added TFA (2.0 mL) at 0 °C and the resulting solution was allowed to stir at 0 °C for 8 h before water was added to quench the reaction. Extracted with DCM, dried over anhydrous Na<sub>2</sub>SO<sub>4</sub>, filtered, the organic phase was concentrated under reduce pressure and the residue was purified by a flash column chromatography on silica gel to give the desired product **1o** (PE:EA = 2:1).

Synthesis of substrate **1p**.

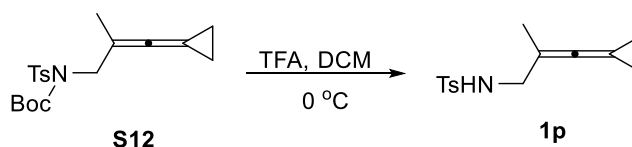

Step 1: To a solution of **S12** (1.0 mmol) in DCM (10 mL) was added TFA (2.0 mL) at 0 °C and the resulting solution was allowed to stir at 0 °C for 8 h before water was added to quench the reaction. Extracted with DCM, dried over anhydrous Na<sub>2</sub>SO<sub>4</sub>, and filtered, the organic phase was concentrated under reduce pressure and the residue was purified by a flash column chromatography on silica gel to give the desired product **1p** (PE:EA = 2:1).

## Synthesis of substrates **5a-5f**.

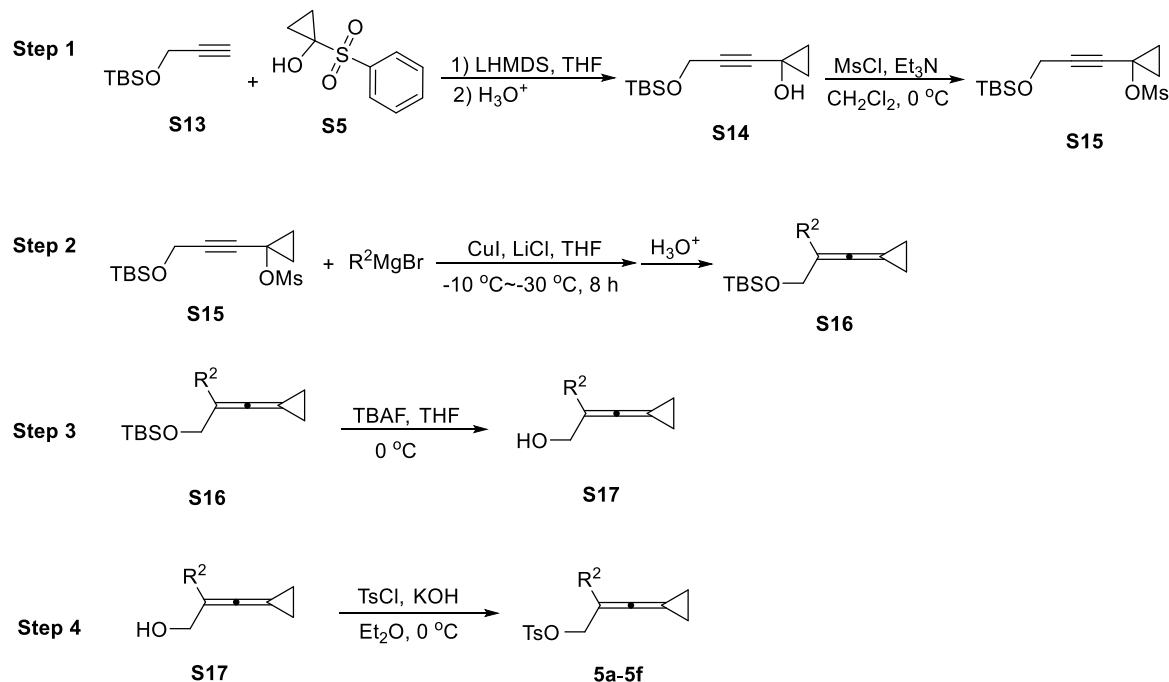

The experimental procedures of step 1 and step 2 were the same as those described above.

**Step 3:** To a flame dried 50 mL flask was added **S16** (2.0 mmol), and the solvent THF (10 mL) under the protection of argon and then, the flask was cooled to 0 °C before the solution of TBAF (1.0 M, 4.0 mL) was added dropwise into the flask under argon. The resulting solution was allowed to stir at 0 °C for 8.0 h before water was added to quench the reaction. Extracted with EA, dried over anhydrous Na<sub>2</sub>SO<sub>4</sub>, and filtered, the organic phase was concentrated under reduce pressure and the residue was purified by a flash column chromatography on silica gel to give the desired products **S17** (PE:EA = 4:1).

**Step 4:** To a solution of **S17** (1.0 mmol) in Et<sub>2</sub>O (10 mL) was added TsCl (1.5 equiv) and KOH (5.0 equiv) at 0 °C and the resulting solution was allowed to stir at 0 °C for 12 h before water was added to quench the reaction. Extracted with EA, dried over anhydrous Na<sub>2</sub>SO<sub>4</sub>, and filtered, the organic phase was concentrated under reduce pressure and the residue was purified by a flash column chromatography on silica gel to give the desired products **5a-5f** (PE:EA = 4:1).

## Synthesis of substrates **7a-7h**.

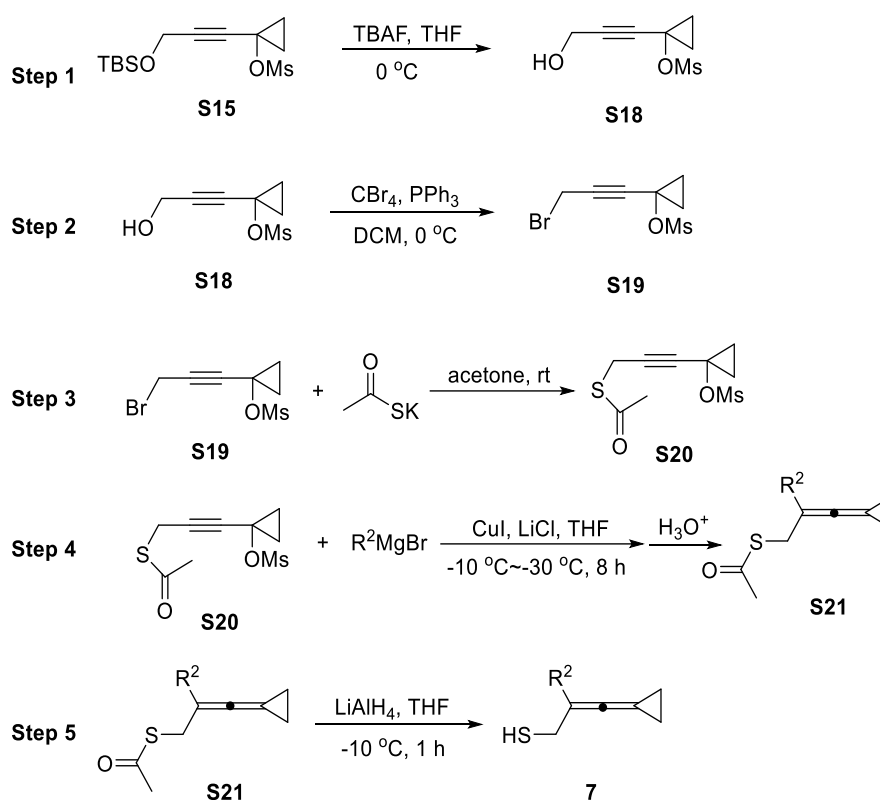

**Step 1:** To a flame dried 50 mL flask was added **S15** (2.0 mmol), and the solvent THF (10 mL) under the protection of argon and then, the flask was cooled to 0 °C before the solution of TBAF (1.0 M, 4.0 mL) was added dropwise into the flask under argon. The resulting solution was allowed to stir at 0 °C for 8.0 h before water was added to quench the reaction. Extracted with EA, dried over anhydrous Na<sub>2</sub>SO<sub>4</sub>, and filtered, the organic phase was concentrated under reduce pressure and the residue was purified by a flash column chromatography on silica gel to give the desired products **S18** (PE:EA = 1:1).

**Step 2:** To a solution of **S18** (1.0 mmol) in DCM (10 mL) was added CBr<sub>4</sub> (1.1 equiv) and the resulting solution was allowed to stir at 0 °C for 5 min before a solution of PPh<sub>3</sub> (1.2 equiv) in DCM (10 mL) was added dropwise into the above flask. The resulting solution was allowed to stir at 0 °C for 2 h before filtered, the organic phase was concentrated under reduce pressure and the residue was purified by a flash column chromatography on silica gel to give the desired products **S19** (PE:EA = 4:1).

**Step 3:** To a solution of **S19** (1.0 mmol) in acetone (5 mL) was added potassium thioacetate (1.5

equiv) and the resulting solution was allowed to stir for 6 h before water was added to quench the reaction. Extracted with EA, dried over anhydrous Na<sub>2</sub>SO<sub>4</sub>, and filtered, the organic phase was concentrated under reduce pressure and the residue was purified by a flash column chromatography on silica gel to give the desired products **S20** (PE:EA = 2:1).

**Step 4:** To a flame dried 25 mL three-neck flask was added anhydrous CuI (2.2 mmol), LiCl (2.2 mmol) and the solvent THF (10 mL) under the protection of argon and then, the flask was cooled to -10 °C before the solution of RMgBr or RMgCl (1.0 M, 2.0 mL) was added dropwise into the flask under argon. After 5 minutes, the flask was moved into a -30~-40 °C bath and the reaction mixture was stirred for a while before a solution of **S20** (1.0 mmol) in THF (10 mL) was added dropwise into the above flask. The resulting solution was allowed to stir at -40 °C for 8 h before saturated NH<sub>4</sub>Cl solution was added to quench the reaction. Extracted with EA (10 mL × 3), dried over anhydrous Na<sub>2</sub>SO<sub>4</sub>, and filtered, the organic phase was concentrated under reduce pressure and the residue was purified by a flash column chromatography on silica gel to give the desired products **S21** (PE:EA = 4:1).

**Step 5:** To a flame dried 25 mL flask was added LiAlH<sub>4</sub> (2 mmol), and the solvent THF (10 mL) under the protection of argon and then, the flask was cooled to -10 °C before the solution of **S21** (1 mmol) was added dropwise into the flask under argon. The resulting solution was allowed to stir at -10 °C for 1 h before NH<sub>4</sub>Cl was added to quench the reaction. Extracted with EA, dried over anhydrous Na<sub>2</sub>SO<sub>4</sub>, and filtered, the organic phase was concentrated under reduce pressure and the residue was purified by a flash column chromatography on silica gel to give the desired products **7** (PE:EA = 10:1).



### 3. Optimization of reaction conditions

**Table S1.** Optimization of reaction conditions using **1r** as a template substrate (without TBAI).<sup>a</sup>

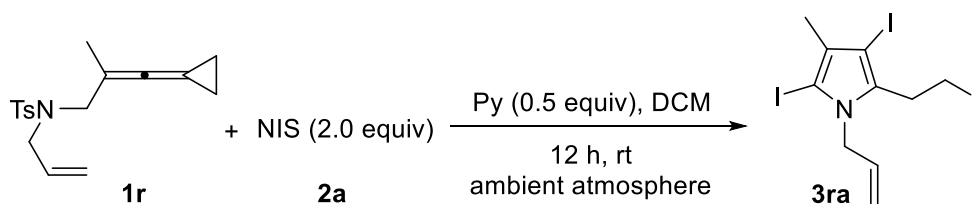

| entry <sup>a</sup> | variation from standard condition                 | <b>3ra</b> , yield <sup>b</sup> [%] |
|--------------------|---------------------------------------------------|-------------------------------------|
| 1                  | none                                              | 60                                  |
| 2                  | Add AgNTf <sub>2</sub> (0.1 equiv)                | 30                                  |
| 3                  | Py (2.0 equiv) instead of Py (0.5 equiv)          | 76                                  |
| 4                  | Add LiNTf <sub>2</sub> (0.1 equiv)                | 60                                  |
| 5                  | Add LiNTf <sub>2</sub> (0.5 equiv)                | 65                                  |
| 6                  | Ar instead of air                                 | 59                                  |
| 7                  | Py (0 equiv) instead of Py (0.5 equiv)            | 40                                  |
| 8                  | Only add IPy <sub>2</sub> BF <sub>4</sub>         | 43                                  |
| 9                  | NCS instead of NIS                                | nd                                  |
| 10                 | NBS instead of NIS                                | 44                                  |
| 11                 | 3.0 equiv NIS instead of 2.0 equiv NIS            | 52                                  |
| 12                 | 3.0 equiv I <sub>2</sub> instead of 2.0 equiv NIS | 15                                  |

<sup>a</sup> Reaction carried out with **1r** (0.2 mmol, 1 equiv), **2a** (2.0 equiv), additive, DCM (2.0 mL).

<sup>b</sup> <sup>1</sup>H NMR yield using 1, 3, 5-trimethoxybenzene as an internal standard.

**Table S2.** Optimization of reaction conditions using **1r** as a template substrate (base).<sup>a</sup>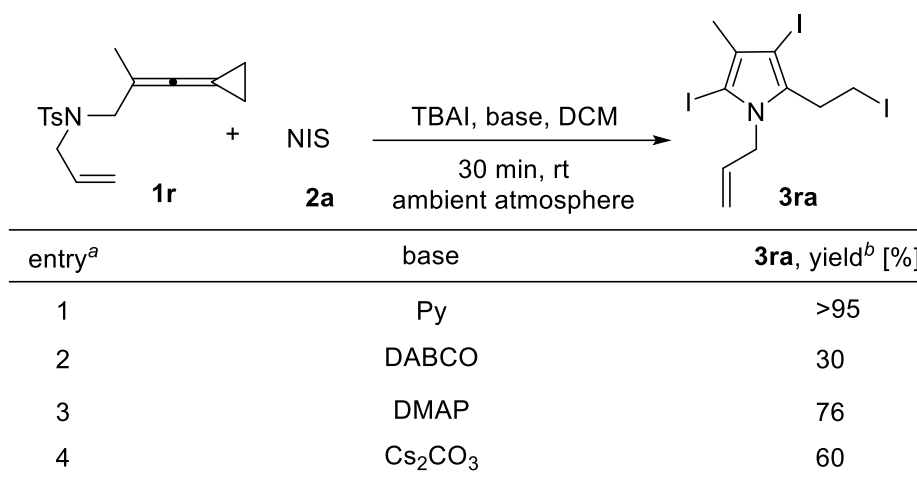

<sup>a</sup> Reaction carried out with **1r** (0.1 mmol), **2a** (3.5 equiv), base (0.5 equiv), TBAI (1.0 equiv), DCM (2.0 mL). <sup>b</sup> <sup>1</sup>H NMR yield using 1, 3, 5-trimethoxybenzene as an internal standard.

**Table S3.** Optimization of reaction conditions using **1r** as a template substrate (solvent).<sup>a</sup>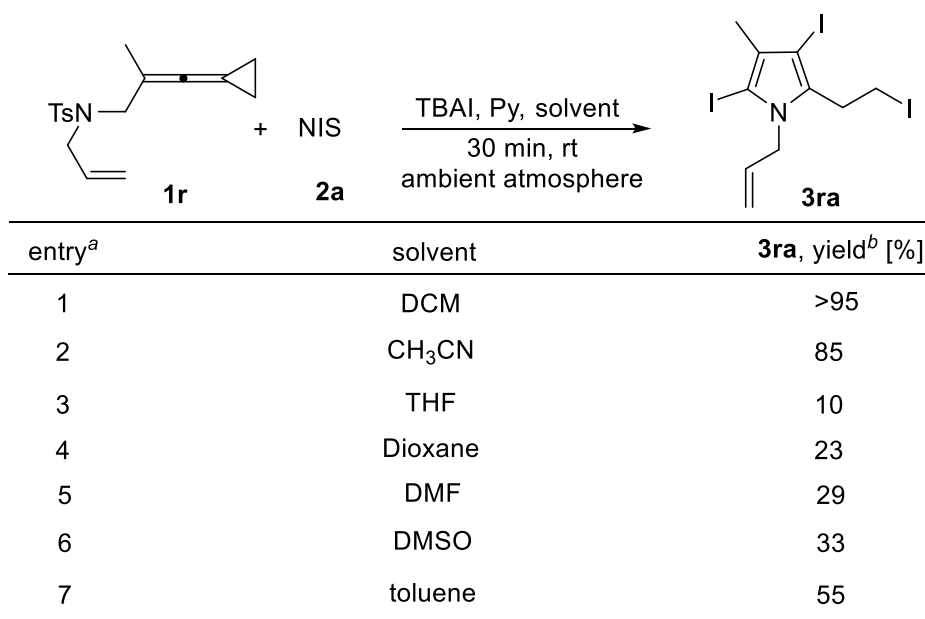

<sup>a</sup> Reaction carried out with **1r** (0.1 mmol), **2a** (3.5 equiv), Py (0.5 equiv), TBAI (1.0 equiv), solvent (2.0 mL). <sup>b</sup> <sup>1</sup>H NMR yield using 1, 3, 5-trimethoxybenzene as an internal standard.

**Table S4.** Optimization of reaction conditions using **1r** as a template substrate (equiv of Py).<sup>a</sup>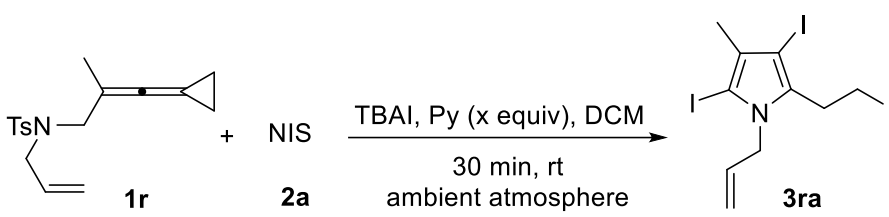

Reaction scheme showing the conversion of **1r** (a substituted allylamine derivative) and **2a** (NIS) to **3ra** (a substituted indole derivative) using TBAI, Py (x equiv), and DCM for 30 min at room temperature under ambient atmosphere.

| entry <sup>a</sup> | X   | <b>3ra</b> , yield <sup>b</sup> [%] |
|--------------------|-----|-------------------------------------|
| 1                  | 0   | 59                                  |
| 2                  | 0.5 | >95                                 |
| 3                  | 1.0 | 68                                  |
| 4                  | 2.0 | 55                                  |
| 5                  | 3.0 | 50                                  |

<sup>a</sup> Reaction carried out with **1r** (0.1 mmol), **2a** (3.5 equiv), Py (x equiv), TBAI (1.0 equiv), DCM (2.0 mL). <sup>b</sup> <sup>1</sup>H NMR yield using 1, 3, 5-trimethoxybenzene as an internal standard.

**Table S5.** Optimization of reaction conditions using **1r** as a template substrate (time).<sup>a</sup>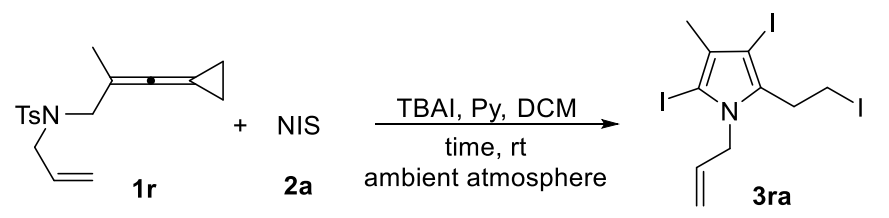

Reaction scheme showing the conversion of **1r** (a substituted allylamine derivative) and **2a** (NIS) to **3ra** (a substituted indole derivative) using TBAI, Py, and DCM for a specified time at room temperature under ambient atmosphere.

| entry <sup>a</sup> | Time   | <b>3ra</b> , yield <sup>b</sup> [%] |
|--------------------|--------|-------------------------------------|
| 1                  | 1 h    | 82                                  |
| 2                  | 30 min | >95                                 |
| 3                  | 2 h    | 76                                  |
| 4                  | 4 h    | 60                                  |
| 5                  | 12 h   | 50                                  |

<sup>a</sup> Reaction carried out with **1r** (0.1 mmol), **2a** (3.5 equiv), Py (0.5 equiv), TBAI (1.0 equiv), DCM (2.0 mL). <sup>b</sup> <sup>1</sup>H NMR yield using 1, 3, 5-trimethoxybenzene as an internal standard.

**Table S6.** Optimization of reaction conditions using **7g** as a template substrate (equiv of NIS).<sup>a</sup>

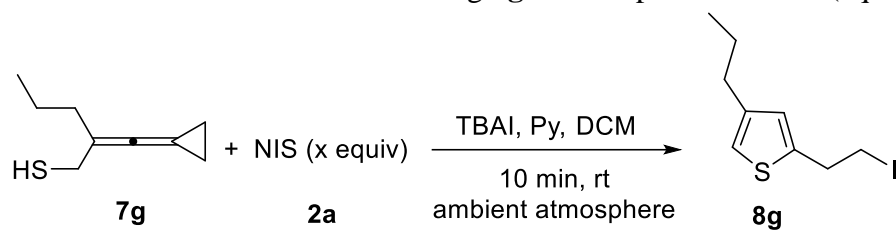

| entry <sup>a</sup> | X   | yield[%] <sup>b</sup> |
|--------------------|-----|-----------------------|
| 1                  | 0   | <3                    |
| 2                  | 0.1 | 12                    |
| 3                  | 0.5 | 46                    |
| 4                  | 1.0 | 93                    |

<sup>a</sup> Reaction carried out with **7g** (0.1 mmol), **2a** (x equiv), Py (0.5 equiv), TBAI (1.0 equiv), DCM (2.0 mL). <sup>b</sup> <sup>1</sup>H NMR yield using 1, 3, 5-trimethoxybenzene as an internal standard.

#### 4. General procedure for the synthesis of **3**, **4**, **6** and **8**

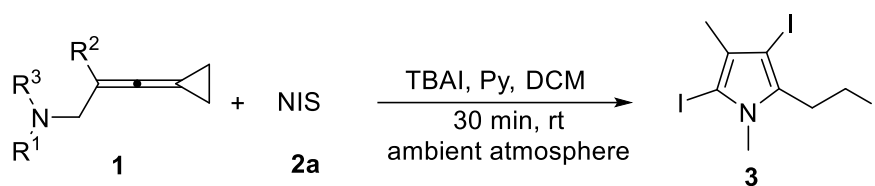

To a 4.0 mL tube were added substrate **1** (0.10 mmol, 1.0 equiv), NIS **2a** (0.35 mmol, 3.5 equiv) and TBAI (0.1 mmol, 1.0 equiv) and then DCM (2.0 mL) and pyridine (Py) (0.05 mmol, 0.5 equiv) were added to this flask via a syringe. The resulting mixture was stirred for 30 min. Then, the solvent was removed under vacuum and the residue was purified by a silica gel column chromatography (PE:EA = 50:1) to give the desired products **3**.

#### General procedure for the synthesis of **4**

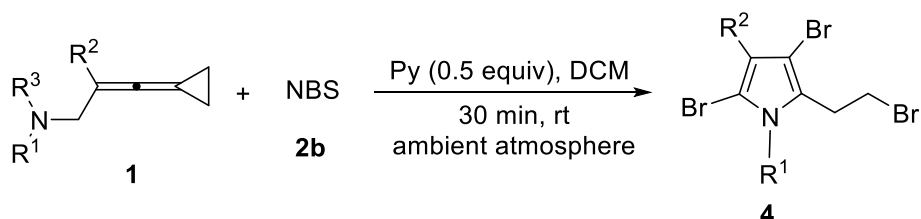

To a 4.0 mL tube were added substrate **1** (0.10 mmol, 1.0 equiv) and NBS **2b** (0.3 mmol, 3.0 equiv) and then DCM (2.0 mL) and pyridine (Py) (0.05 mmol, 0.5 equiv) were added to this flask via a syringe. The resulting mixture was stirred for 30 min. Then, the solvent was removed under vacuum and the residue was purified by a silica gel column chromatography (PE:EA = 50:1) to give the desired products **4**.

#### General procedure for the synthesis of **6**

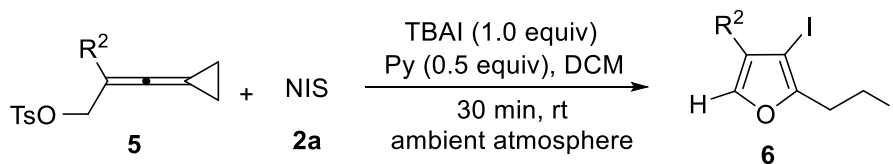

To a 4.0 mL tube were added substrate **5** (0.10 mmol, 1.0 equiv) and NIS **2a** (0.2 mmol, 2.0 equiv) and then DCM (2.0 mL) and pyridine (Py) (0.05 mmol, 0.5 equiv) were added to this flask via a

syringe. The resulting mixture was stirred for 30 min. Then, the solvent was removed under vacuum and the residue was purified by a silica gel column chromatography (PE:EA = 50:1) to give the desired products **6**.

### General procedure for the synthesis of **8**

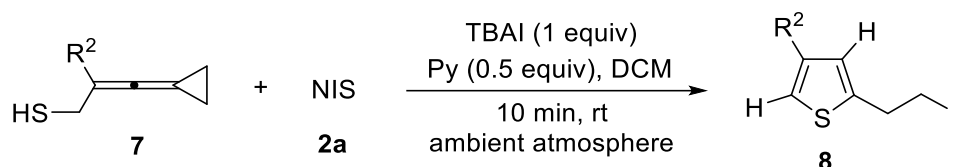

To a 4.0 mL tube were added substrate **7** (0.10 mmol, 1.0 equiv) and NIS **2a** (0.2 mmol, 1.0 equiv) and then DCM (2.0 mL) and pyridine (Py) (0.05 mmol, 0.5 equiv) were added to this flask via a syringe. The resulting mixture was stirred for 30 min. Then, the solvent was removed under vacuum and the residue was purified by a silica gel column chromatography (PE:EA = 50:1) to give the desired products **8**.

### Figure S1

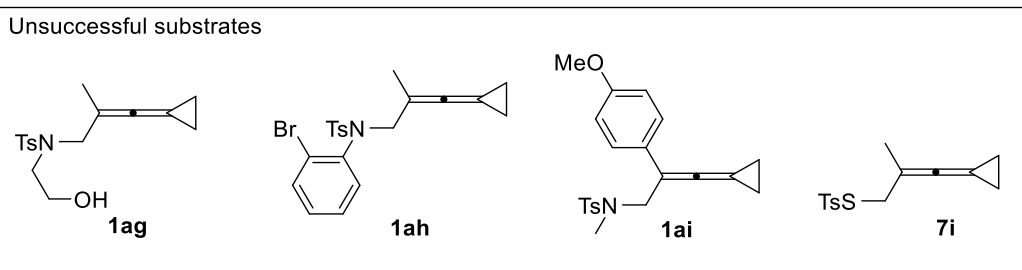

## 5. Control experiment

(a)

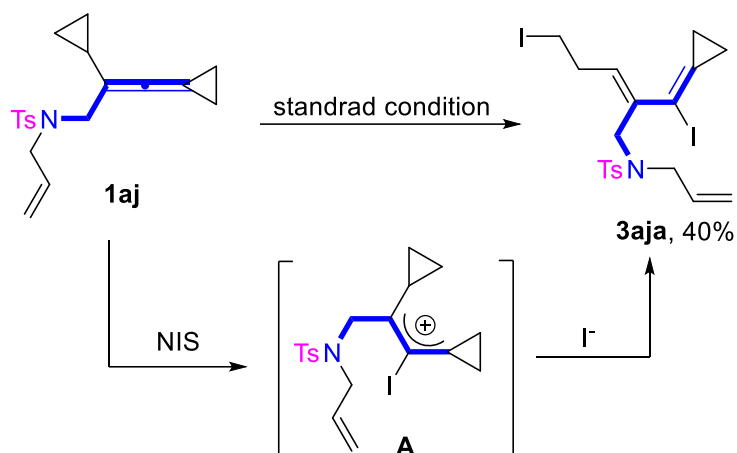

To a 4.0 mL tube were added substrate **1aj** (0.10 mmol, 1.0 equiv), **NIS** (0.35 mmol, 3.5 equiv) and TBAI (0.1 mmol, 1.0 equiv) and then DCM (2.0 mL) and pyridine (Py) (0.05 mmol, 0.5 equiv) were added to this tube via a syringe. The resulting mixture was stirred for 30 min. Then, the solvent was removed under vacuum and the residue was purified by a silica gel column chromatography (PE:EA = 50:1) to give the product **3aja**.

(b)

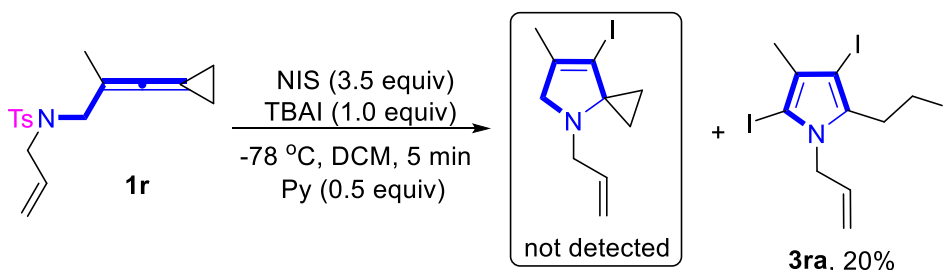

To a 4.0 mL tube were added substrate **1r** (0.10 mmol, 1.0 equiv), **NIS** (0.35 mmol, 3.5 equiv) and TBAI (0.1 mmol, 1.0 equiv) and then DCM (2.0 mL) and pyridine (Py) (0.05 mmol, 0.5 equiv) were added to this tube via a syringe, and the flask was cooled to -78 °C. The resulting mixture was stirred for 5 min. Then, the solvent was removed under vacuum and the residue was purified by a silica gel column chromatography (PE:EA = 50:1) to give the product **3ra** in 20% yield. This result indicated that substrate **1r** did not give the expected intermediate under the standard conditions, but the corresponding product was obtained directly.

(c)

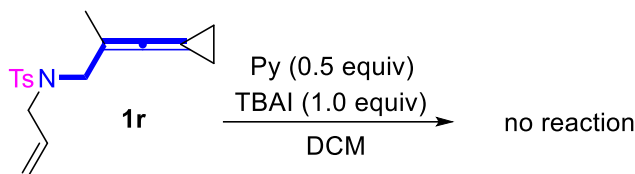

To a 4.0 mL tube were added substrate **1r** (0.10 mmol, 1.0 equiv), TBAI (0.1 mmol, 1.0 equiv) and then DCM (2.0 mL), pyridine (Py) (0.05 mmol, 0.5 equiv) were added to this tube via a syringe. The resulting mixture was stirred for 5 min. After the removal of solvent under reduced pressure, the residue was purified by a column chromatography on silica gel (PE / EA = 50:1). This result indicated that substrate **1r** did not react in the absence of NIS.

(d)

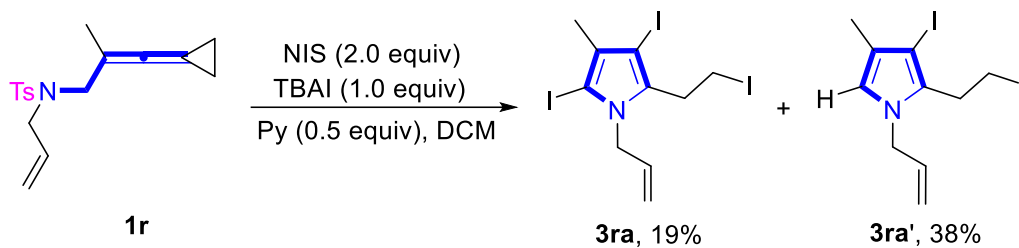

To a 4.0 mL tube were added substrate **1r** (0.10 mmol, 1.0 equiv), NIS (0.20 mmol, 2.0 equiv), TBAI (0.1 mmol, 1.0 equiv) and then DCM (2.0 mL), pyridine (Py) (0.05 mmol, 0.5 equiv) were added to this tube via a syringe. The resulting mixture was stirred for 30 min. Then, the solvent was removed under vacuum and the residue was purified by a silica gel column chromatography (PE:EA = 50:1) to give the products **3ra** and **3ra'**. This result indicated that substrate **1r** produced diiodosubstituted product **3ra'** under the condition with insufficient amount of NIS, rendering that the triiodosubstituted product was afforded by the further iodination of the corresponding diiodosubstituted product.



(e)

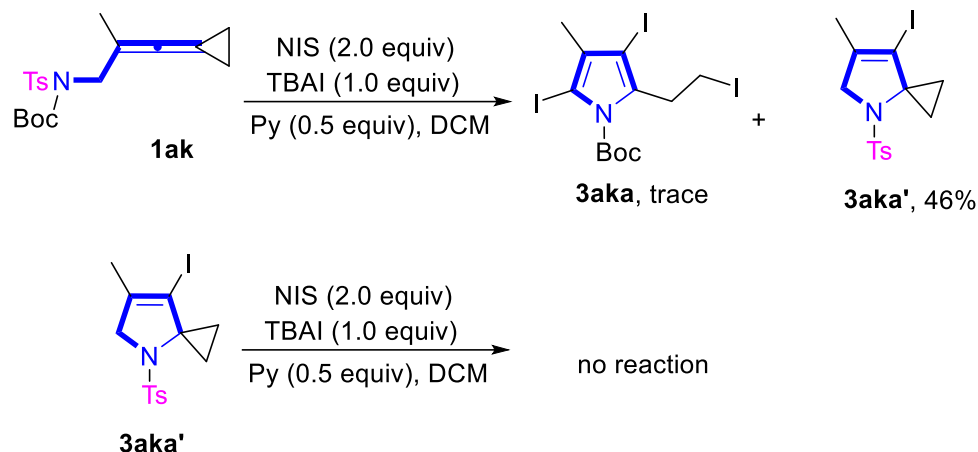

To a 4.0 mL tube were added substrate **1ak** (0.10 mmol, 1.0 equiv), NIS (0.20 mmol, 2.0 equiv), TBAI (0.1 mmol, 1.0 equiv) and then DCM (2.0 mL), pyridine (Py) (0.05 mmol, 0.5 equiv) were added to this tube via a syringe. The resulting mixture was stirred for 30 min. Then, the solvent was removed under vacuum and the residue was purified by a silica gel column chromatography (PE:EA = 50:1) to give the products **3aka'**. Then, to a 4.0 mL tube were added substrate **1ak** (0.05 mmol, 1.0 equiv), NIS (0.10 mmol, 2.0 equiv), TBAI (0.05 mmol, 1.0 equiv) and then DCM (1.0 mL), pyridine (Py) (0.025 mmol, 0.5 equiv) were added to this tube via a syringe. The resulting mixture was stirred for 30 min. No reaction occurs. These results indicated that **3aka'** was not the active intermediate for this reaction. Thus, we exclude the following reaction pathway.

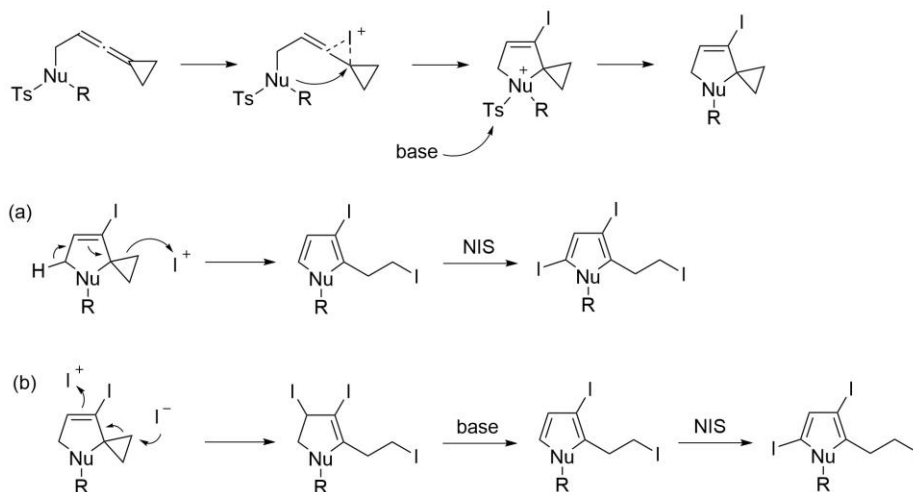

## 6. Gram scale reaction

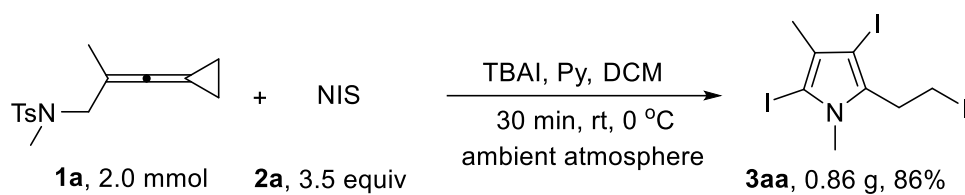

To a flame 50 mL flask was added **1a** (2.0 mmol, 0.55 g, 1.0 equiv), TBAI (2.0 mmol, 0.74 g, 1.0 equiv), pyridine (Py) (1.0 mmol, 80 uL, 0.5 equiv) and the solvent DCM (10 mL) and then, the flask was cooled to 0 °C before NIS **2a** (7.0 mmol, 1.58 g, 3.5 equiv) was added into the flask. The resulting solution was allowed to stir for 30 min before saturated water was added to quench the reaction. Extracted with EA (10 mL x 3), dried over anhydrous Na<sub>2</sub>SO<sub>4</sub>, and filtered, the organic phase was concentrated under reduce pressure and the residue was purified by a flash column chromatography on silica gel to give the desired product **3aa** (PE:EA = 100:1).

## 7. Transformation of product 3aa

### A. Substitution

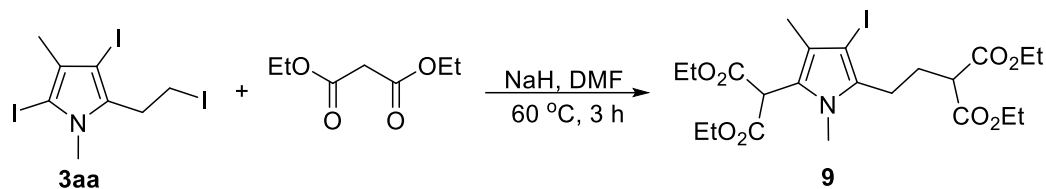

To a flame dried 50 mL flask was added NaH, diethyl malonate and the solvent DMF (20 mL) under the protection of argon and then, the flask was heated to  $60\text{ }^\circ\text{C}$  before substrate **3aa** was added dropwise into the flask under argon. The resulting solution was allowed to stir for 3 h before saturated  $\text{NH}_4\text{Cl}$  solution was added to quench the reaction. Extracted with EA (20 mL  $\times$  3), dried over anhydrous  $\text{Na}_2\text{SO}_4$ , and filtered, the organic phase was concentrated under reduce pressure and the residue was purified by a flash column chromatography on silica gel to give the desired product **9** (PE:EA = 2:1).<sup>[2]</sup>

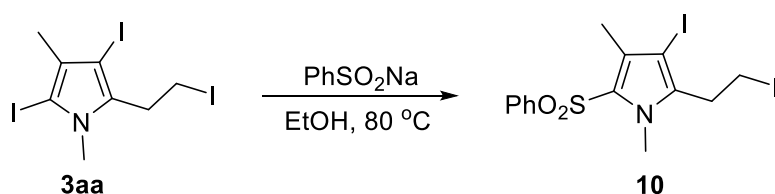

To a 50 mL flask was added **3aa**,  $\text{PhSO}_2\text{Na}$  and the solvent EtOH (20 mL) and then, the flask was heated to  $80\text{ }^\circ\text{C}$ . The resulting solution was allowed to stir for 12 h before the water was added to quench the reaction. Extracted with EA (20 mL  $\times$  3), dried over anhydrous  $\text{Na}_2\text{SO}_4$ , and filtered, the organic phase was concentrated under reduce pressure and the residue was purified by a flash column chromatography on silica gel to give the desired product **10** (PE:EA = 4:1).<sup>[2]</sup>

## B. Suzuki Coupling

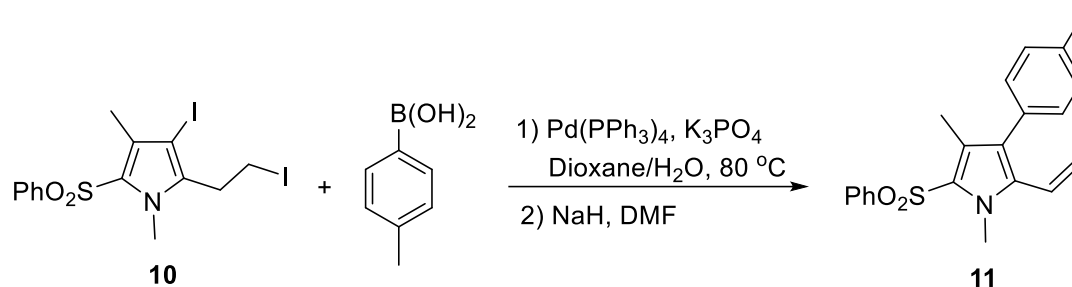

(1) To a flame dried 25 mL flask was added **10** (0.2 mmol), 4-tolylboronic acid (2.0 equiv), Pd(PPh<sub>3</sub>)<sub>4</sub> (5 mol%), K<sub>3</sub>PO<sub>4</sub> (2.5 equiv) and the solvent dioxane/H<sub>2</sub>O (2.0+2.0 mL) under the protection of argon and then, the flask was heated to 80 °C. The resulting solution was allowed to stir for 12 h before saturated NH<sub>4</sub>Cl solution was added to quench the reaction. Extracted with EA (10 mL × 3), dried over anhydrous Na<sub>2</sub>SO<sub>4</sub>, and filtered, the organic phase was concentrated under reduce pressure and the residue was purified by a flash column chromatography on silica gel to give the intermediate product (PE:EA = 4:1).<sup>[3]</sup>

(2) To a 25 mL flask was added the intermediate product, NaH, and the solvent DMF and then, the resulting solution was allowed to stir for 12 h. Extracted with EA (10 mL × 3), dried over anhydrous Na<sub>2</sub>SO<sub>4</sub>, and filtered, the organic phase was concentrated under reduce pressure and the residue was purified by a flash column chromatography on silica gel to give the desired product **11** (PE:EA = 4:1).<sup>[4]</sup>

### C. Ullmann Coupling

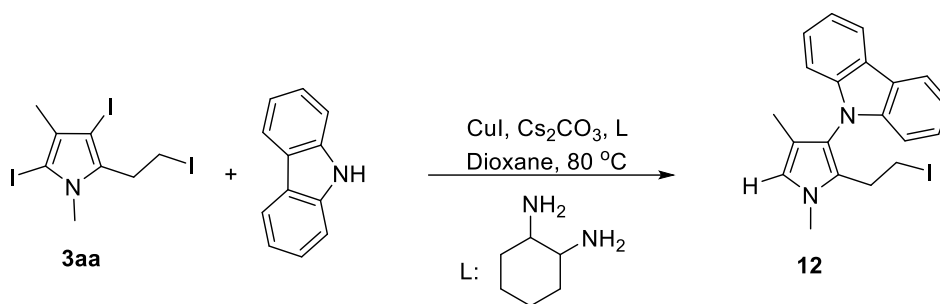

To a flame dried 25 mL flask was added **3aa** (0.2 mmol), carbazole (1.5 equiv), CuI (20 mol%), Cs<sub>2</sub>CO<sub>3</sub> (2.0 equiv) and the solvent of dioxane (2.0 mL) under the protection of argon and then, the flask was heated to 80 °C. The resulting solution was allowed to stir for 12 h before water was added to quench the reaction. Extracted with EA (10 mL × 3), dried over anhydrous Na<sub>2</sub>SO<sub>4</sub>, and filtered, the organic phase was concentrated under reduce pressure and the residue was purified by a flash column chromatography on silica gel to give the desired product **12** (PE:EA = 4:1).

### D. Sonogashira Coupling

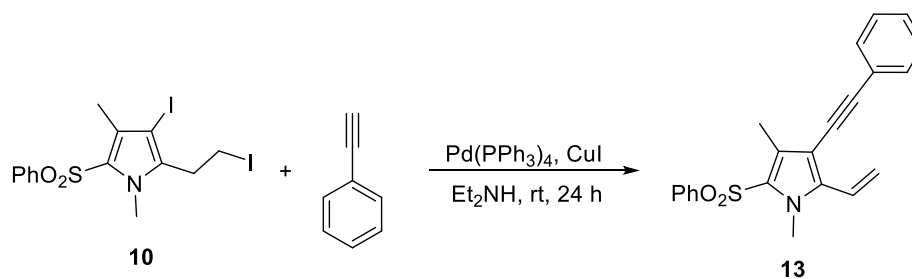

To a flame dried 25 mL flask was added **10** (0.2 mmol), phenylacetylene (2.0 equiv), Pd(PPh<sub>3</sub>)<sub>4</sub> (5 mol%), CuI (10 mol%) and the solvent Et<sub>2</sub>NH (2.0 mL) under the protection of argon and then, the resulting solution was allowed to stir for 12 h before water was added to quench the reaction. Extracted with EA (10 mL×3), dried over anhydrous Na<sub>2</sub>SO<sub>4</sub>, and filtered, the organic phase was concentrated under reduce pressure and the residue was purified by a flash column chromatography on silica gel to give the desired product **13** (PE:EA = 4:1).<sup>[5]</sup>

## E. Polymerization

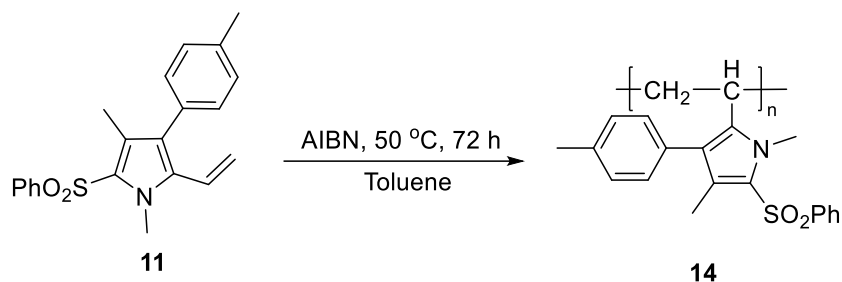

To a flame dried 10 mL flask was added **11** (150 mg), AIBN (15 mg), and the solvent of toluene (1.0 mL) under the protection of argon and then, the resulting solution was allowed to stir for 72 h. The reaction mixture was poured into n-pentane (10 mL), filtered and washed with n-pentane give 53 mg of a yellow solid **14**.<sup>[6]</sup> The obtained polymeric product was analyzed by <sup>1</sup>H NMR spectroscopic data and GPC.

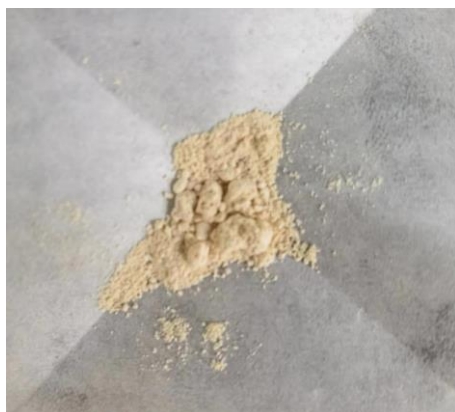

**Figure S2.** Picture of **14**

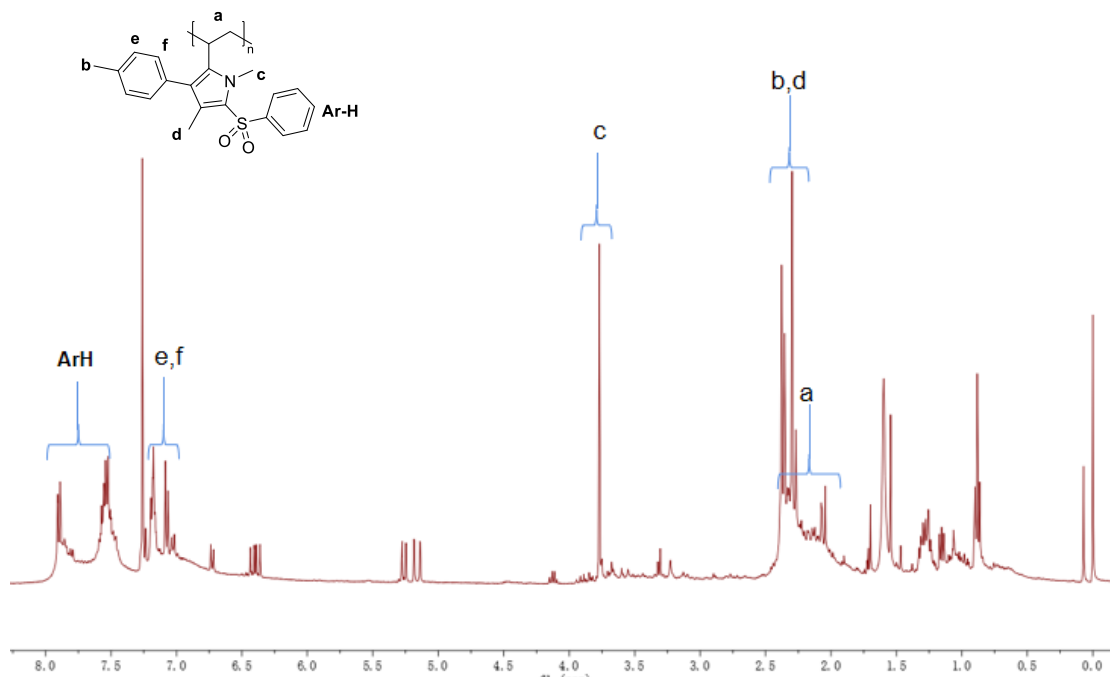

**Figure S3.** <sup>1</sup>H NMR spectra of **14**

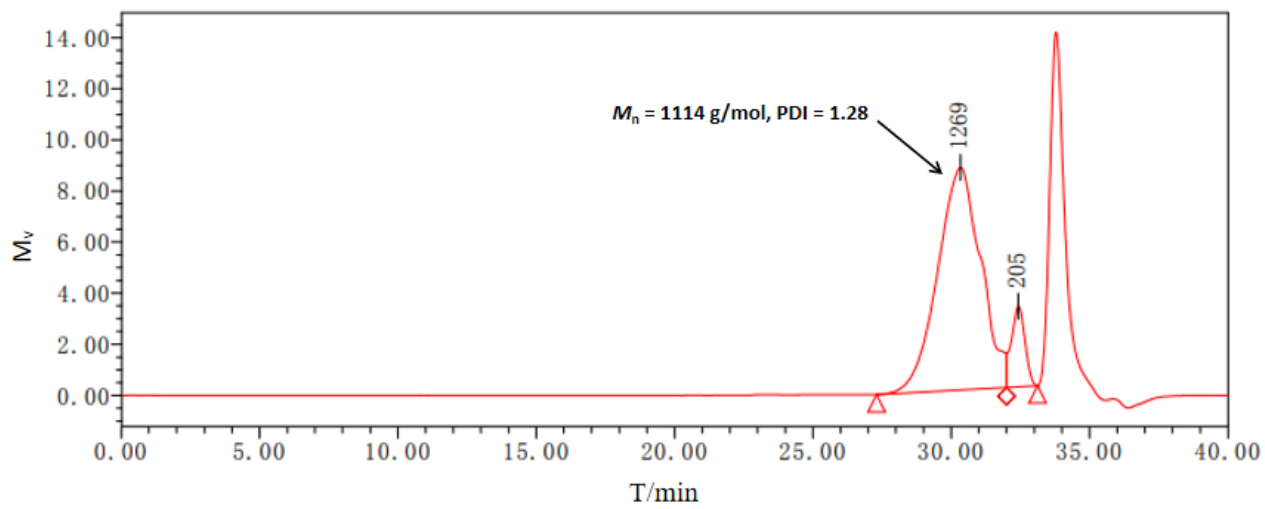

**Figure S4.** GPC analysis of **14**

## 8. Spectroscopic data of substrates 1, 5, 7

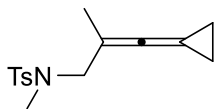

### *N*-(3-cyclopropylidene-2-methyl-3 $\lambda^5$ -allyl)-*N*,4-dimethylbenzenesulfonamide (**1a**)

A white solid, 58% yield, 178.8 mg. M.P.: 85-87 °C.  $^1\text{H}$  NMR ( $\text{CDCl}_3$ , TMS, 600 MHz)  $\delta$  7.67 (d,  $J$  = 8.3 Hz, 2H), 7.31 (d,  $J$  = 8.0 Hz, 2H), 3.59 (s, 2H), 2.67 (s, 3H), 2.42 (s, 3H), 1.79 (s, 3H), 1.47 - 1.37 (m, 4H).  $^{13}\text{C}$  NMR ( $\text{CDCl}_3$ , TMS, 150 MHz)  $\delta$  188.8, 143.2, 134.4, 129.6, 127.4, 97.1, 77.4, 54.7, 33.8, 21.4, 16.7, 7.0. IR (neat)  $\nu$  733, 771, 894, 1045, 1089, 1155, 1339, 1443, 1605, 2019  $\text{cm}^{-1}$ . HRMS (ESI) calcd. for  $\text{C}_{15}\text{H}_{19}\text{NO}_2\text{SNa}$  ( $\text{M}+\text{Na}$ ): 300.1034, Found: 300.1036.

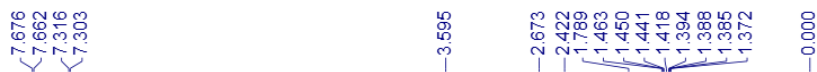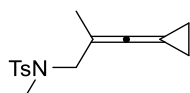

$^1\text{H}$  NMR ( $\text{CDCl}_3$ , 600 MHz, TMS)

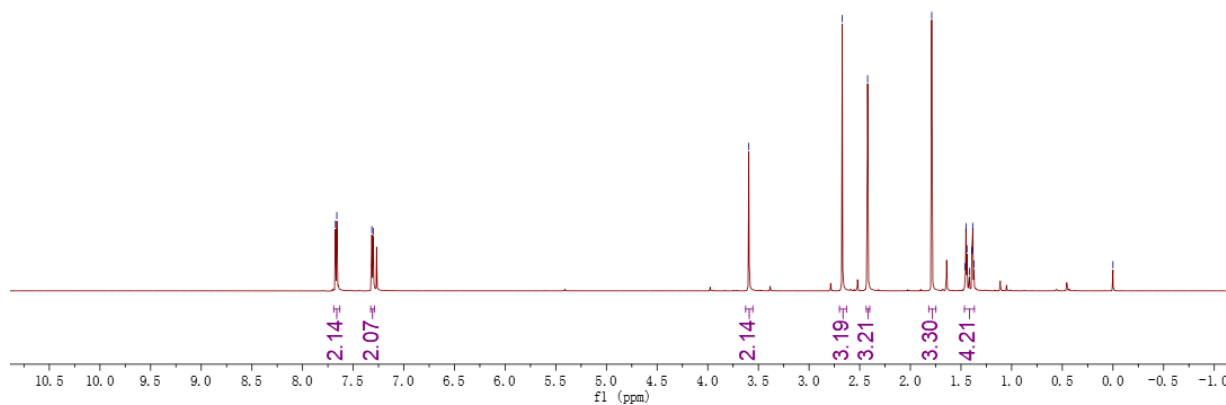



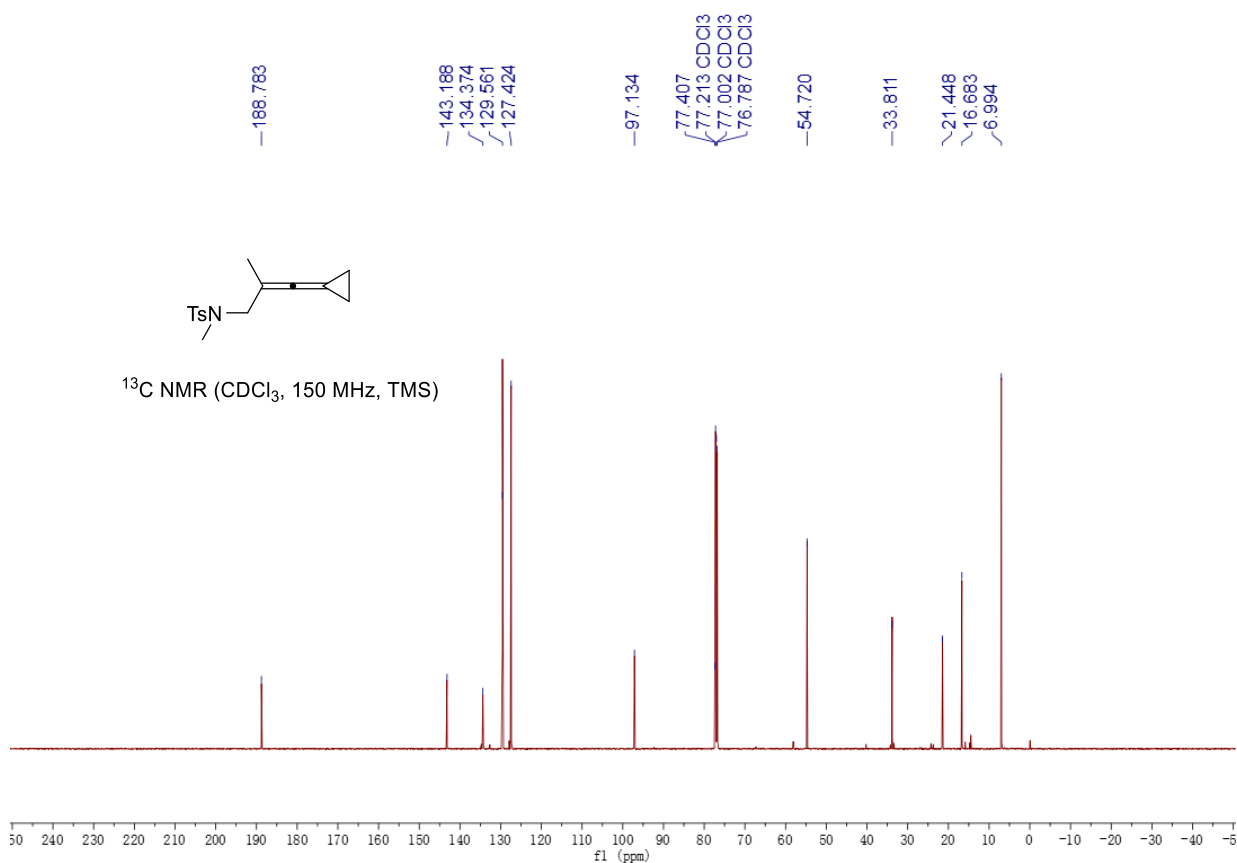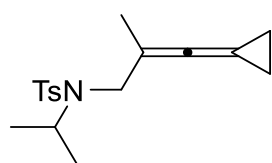

***N*-(3-cyclopropylidene-2-methyl-3λ<sup>5</sup>-allyl)-*N*-isopropyl-4-methylbenzenesulfonamide (**1b**)**

A yellow oil, 51% yield, 155.7 mg. <sup>1</sup>H NMR (CDCl<sub>3</sub>, TMS, 400 MHz) δ 7.68 (d, *J* = 7.9 Hz, 2H), 7.26 - 7.24 (m, 2H), 4.10 - 3.99 (m, 1H), 3.85 (s, 2H), 2.41 (s, 3H), 1.82 (s, 3H), 1.58 (s, 3H), 1.48 - 1.39 (m, 4H), 1.08 (d, *J* = 6.8 Hz, 6H). <sup>13</sup>C NMR (CDCl<sub>3</sub>, TMS, 100 MHz) δ 188.0, 142.7, 138.3, 129.5, 126.9, 100.5, 78.1, 49.8, 47.5, 21.5, 20.7, 16.8, 6.5. IR (neat) ν 733, 771, 894, 1045, 1089, 1155, 1339, 1443, 1605, 2019, 2917 cm<sup>-1</sup>. HRMS (ESI) calcd. for C<sub>17</sub>H<sub>23</sub>NO<sub>2</sub>SNa (M+Na): 328.1342, Found: 328.1343.

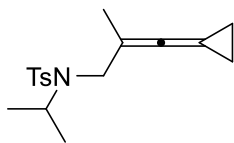

$^1\text{H}$  NMR ( $\text{CDCl}_3$ , 400 MHz, TMS)

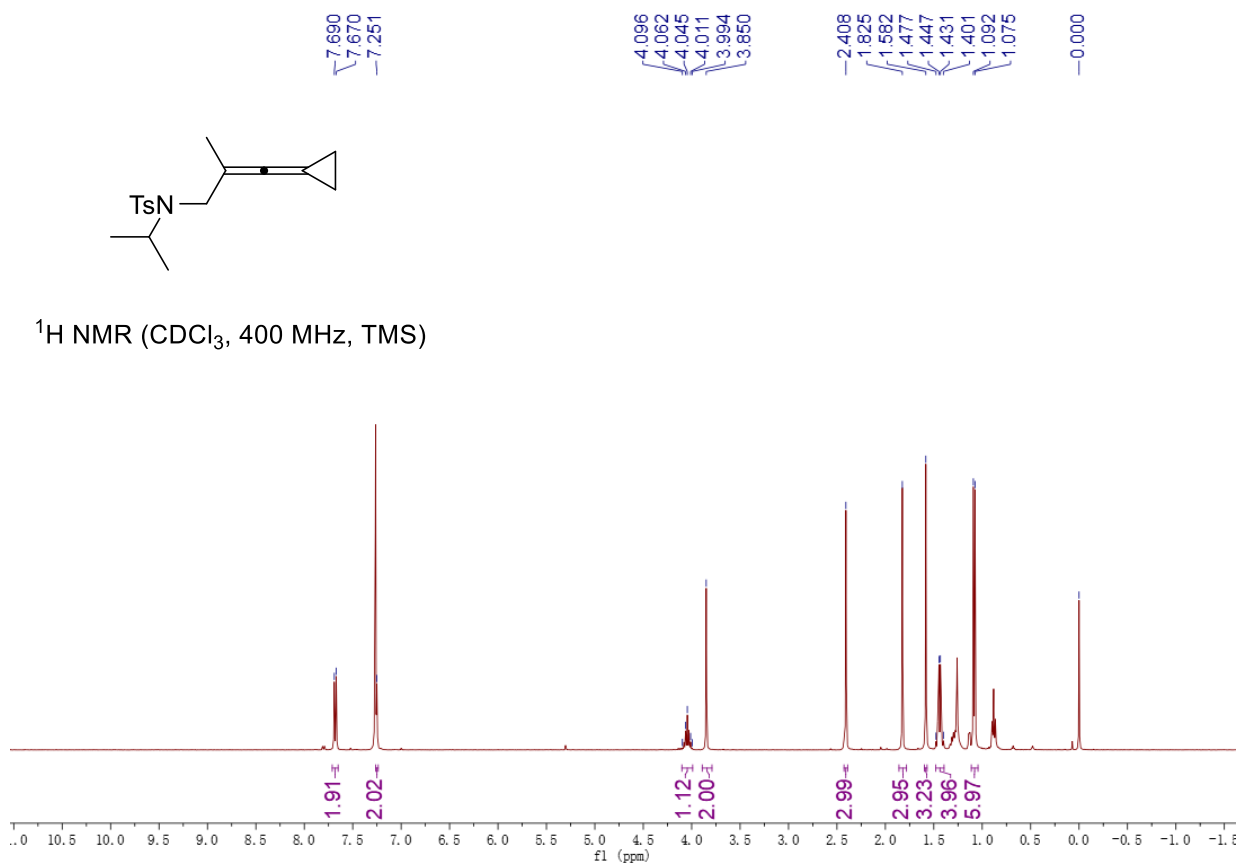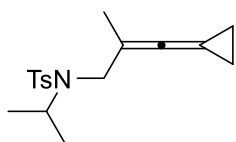

$^{13}\text{C}$  NMR ( $\text{CDCl}_3$ , 100 MHz, TMS)

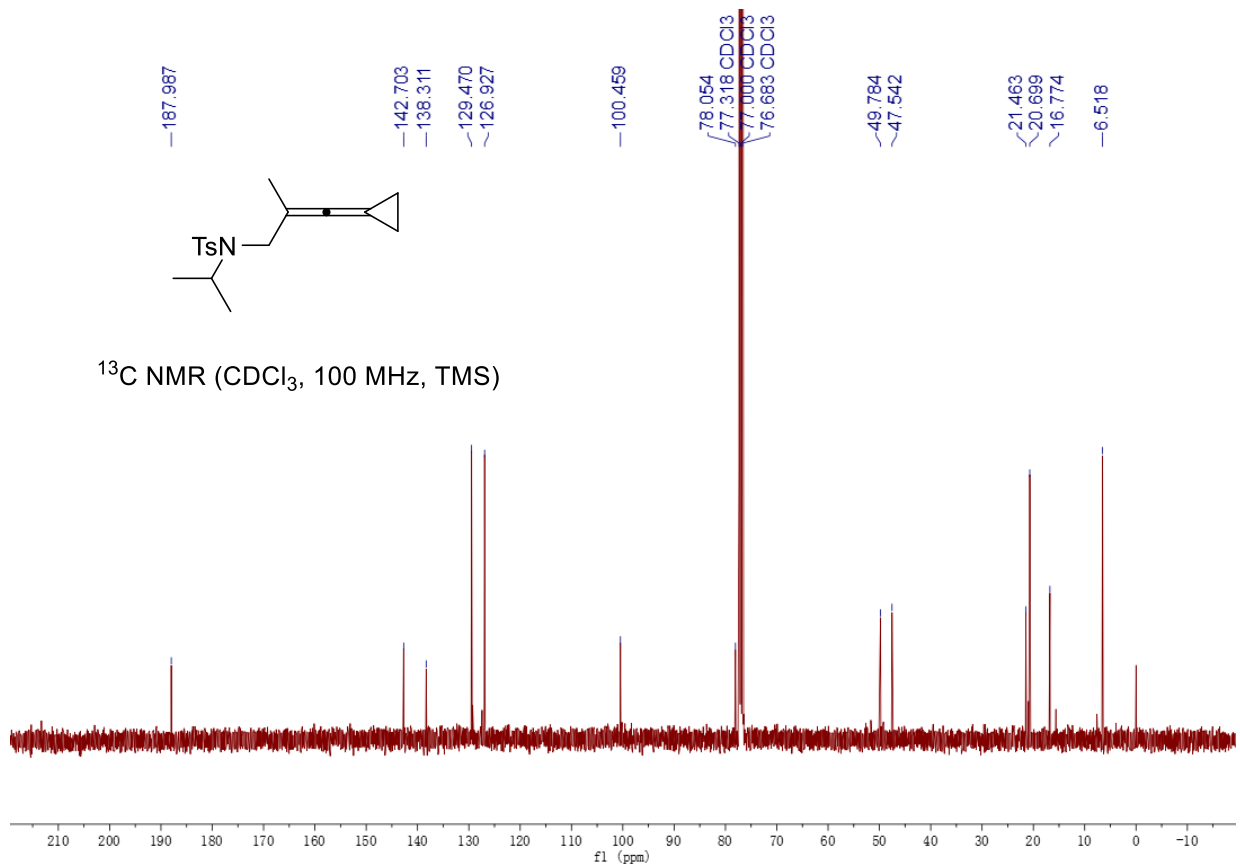

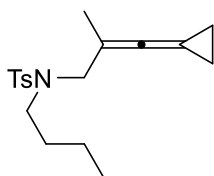

***N*-butyl-*N*-(3-cyclopropylidene-2-methyl-3 $\lambda$ <sup>5</sup>-allyl)-4-methylbenzenesulfonamide (1c)**

A colorless oil, 50% yield, 159.7 mg. <sup>1</sup>H NMR (CDCl<sub>3</sub>, TMS, 600 MHz)  $\delta$  7.69 (d,  $J$  = 8.3 Hz, 2H), 7.28 (d,  $J$  = 8.1 Hz, 2H), 3.79 (s, 2H), 3.16 - 3.07 (m, 2H), 2.41 (s, 3H), 1.73 (s, 3H), 1.50 - 1.43 (m, 4H), 1.39 - 1.34 (m, 2H), 1.27 - 1.21 (m, 2H), 0.86 (t,  $J$  = 7.4 Hz, 3H). <sup>13</sup>C NMR (CDCl<sub>3</sub>, TMS, 150 MHz)  $\delta$  188.7, 142.8, 137.4, 129.5, 127.1, 97.8, 77.5, 52.4, 47.3, 29.9, 21.5, 20.0, 16.9, 13.7, 6.9. IR (neat)  $\nu$  727, 835, 921, 985, 1083, 1157, 1249, 1339, 1461, 2021, 2928 cm<sup>-1</sup>. HRMS (ESI) calcd. for C<sub>18</sub>H<sub>25</sub>NO<sub>2</sub>NaS (M+Na): 342.1498, Found: 342.1505.

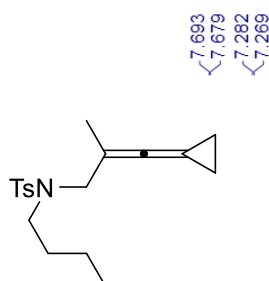

<sup>1</sup>H NMR (CDCl<sub>3</sub>, 600 MHz, TMS)

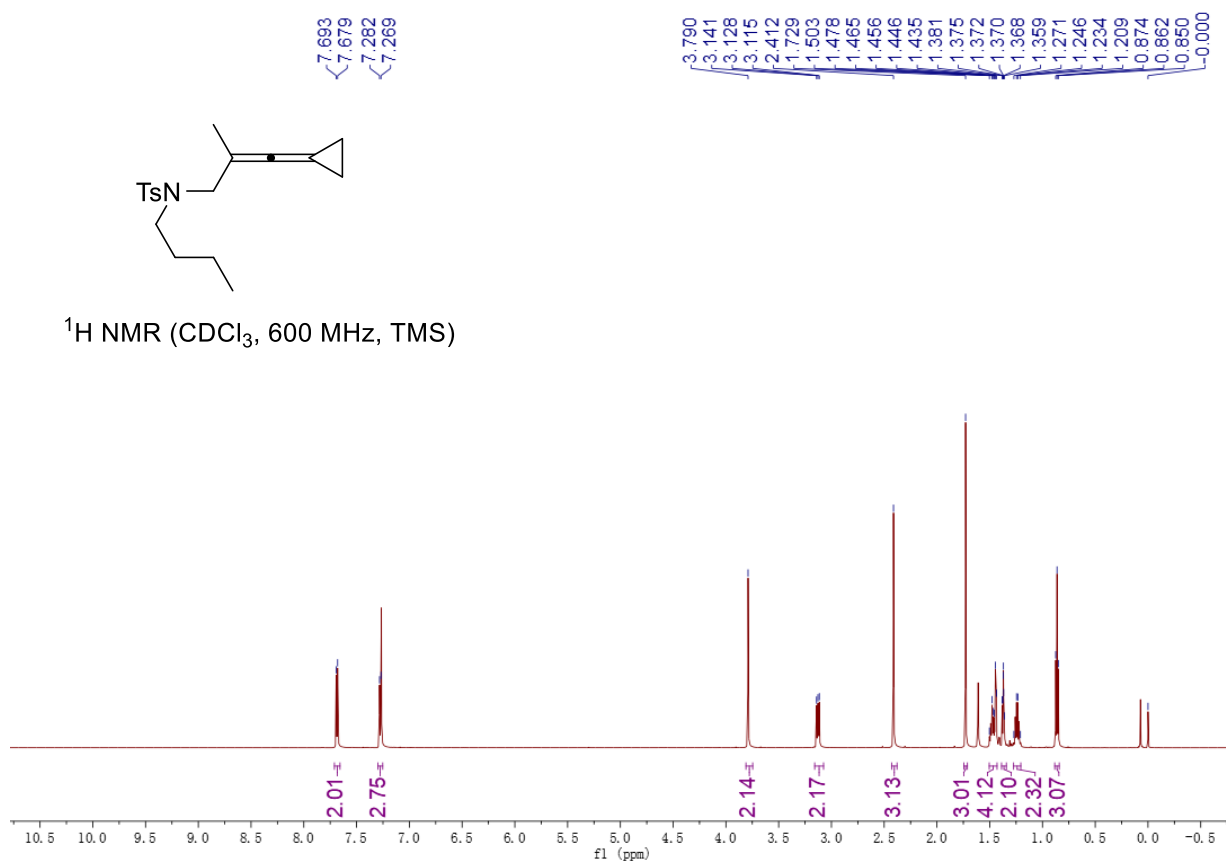

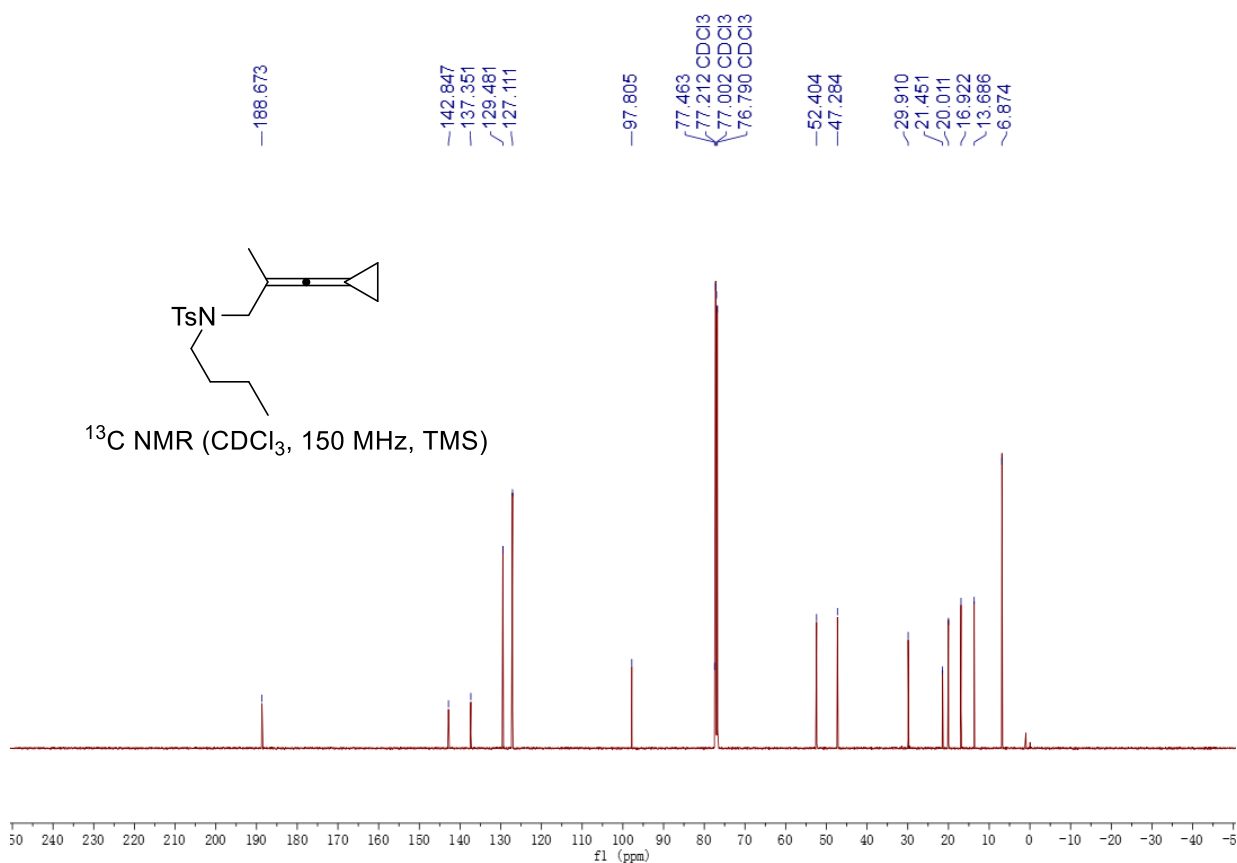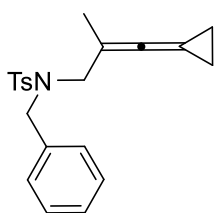

***N*-benzyl-*N*-(3-cyclopropylidene-2-methyl-3-allyl)-4-methylbenzenesulfonamide (1d)**

A colorless oil, 41% yield, 144.9 mg. <sup>1</sup>H NMR (CDCl<sub>3</sub>, TMS, 400 MHz) δ 7.71 (d, *J* = 8.3 Hz, 2H), 7.28 (d, *J* = 8.1 Hz, 2H), 7.24 (s, 5H), 4.37 (s, 2H), 3.77 (s, 2H), 2.42 (s, 3H), 1.53 (s, 3H), 1.43 - 1.30 (m, 4H). <sup>13</sup>C NMR (CDCl<sub>3</sub>, TMS, 100 MHz) δ 188.8, 143.0, 137.6, 136.1, 129.5, 128.8, 128.2, 127.5, 127.2, 97.3, 77.6, 51.4, 50.4, 21.5, 16.9, 6.8. IR (neat) ν 860, 891, 1008, 1088, 1157, 1331, 2029, 2930 cm<sup>-1</sup>. HRMS (ESI) calcd. for C<sub>21</sub>H<sub>23</sub>NO<sub>2</sub>NaS (M+Na): 376.1342, Found: 376.1346.

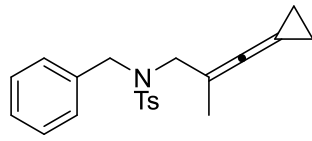

$^1\text{H}$  NMR ( $\text{CDCl}_3$ , 400 MHz, TMS)

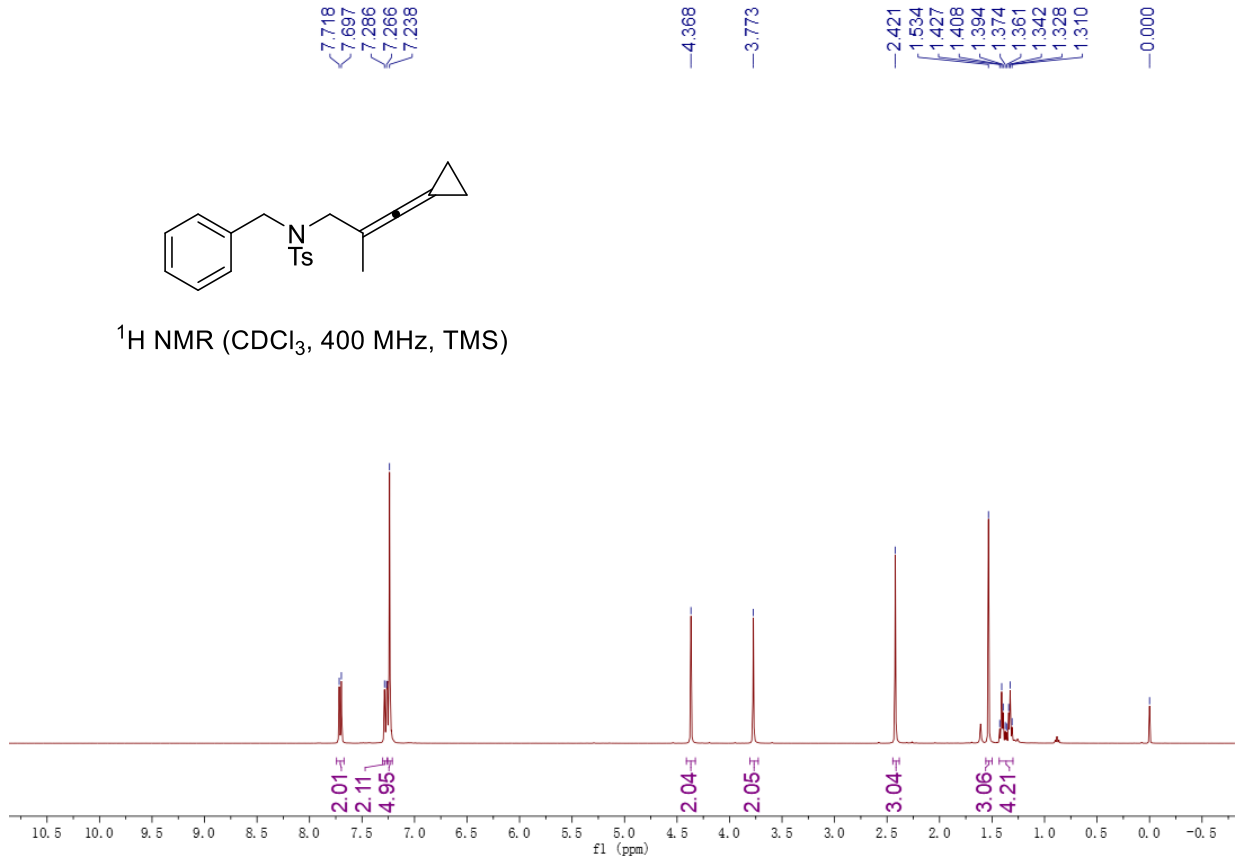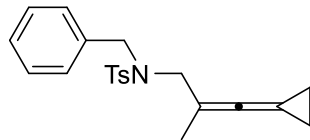

$^{13}\text{C}$  NMR ( $\text{CDCl}_3$ , 100 MHz, TMS)

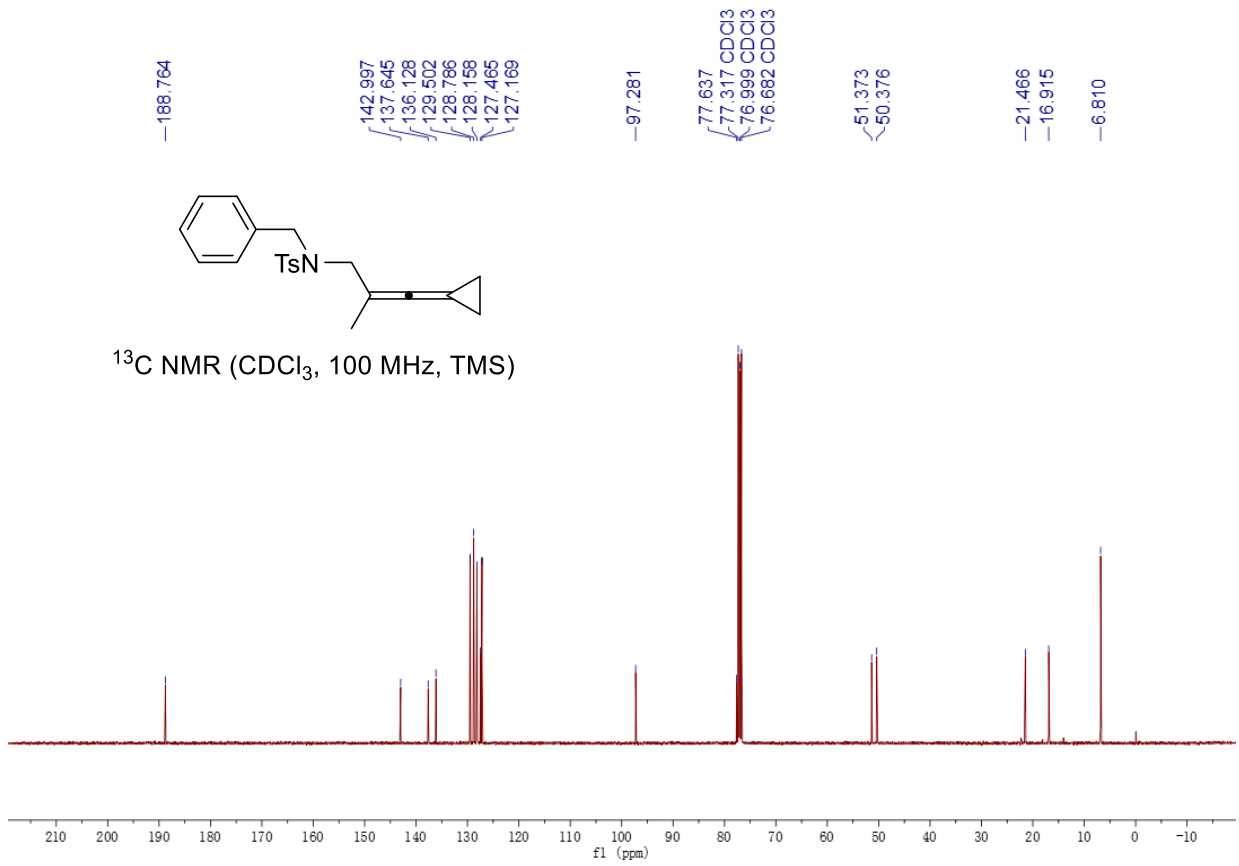

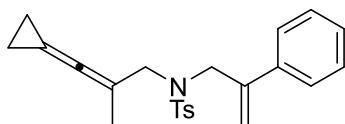

***N*-(3-cyclopropylidene-2-methyl-3λ<sup>5</sup>-allyl)-4-methyl-*N*-(2-phenylallyl)benzenesulfonamide (1e)**

This is a known compound and its spectroscopic data are consistent with those reported in the previous literature,<sup>[1]</sup> 46% yield, 174.6 mg. <sup>1</sup>H NMR (CDCl<sub>3</sub>, TMS, 400 MHz) δ 7.62 (d, *J* = 8.4 Hz, 2H), 7.22 - 7.34 (m, 7H), 5.36 (s, 1H), 5.20 (s, 1H), 4.26 (s, 2H), 3.79 (s, 2H), 2.41 (s, 3H), 1.54 (s, 3H), 1.38 - 1.42 (m, 2H), 1.29 - 1.32 (m, 2H). <sup>13</sup>C NMR (CDCl<sub>3</sub>, TMS, 100 MHz) δ 188.7, 142.9, 142.8, 139.1, 137.2, 129.4, 128.2, 127.7, 127.2, 126.6, 116.1, 97.7, 77.6, 51.1, 51.6, 50.8, 21.4, 17.0, 6.6.

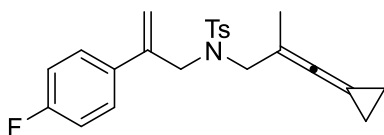

***N*-(3-cyclopropylidene-2-methyl-3λ<sup>5</sup>-allyl)-*N*-(2-(4-fluorophenyl)allyl)-4-methylbenzenesulfonamide (1f)**

This is a known compound and its spectroscopic data are consistent with those reported in the previous literature,<sup>[1]</sup> 41% yield, 163.0 mg. <sup>1</sup>H NMR (CDCl<sub>3</sub>, TMS, 400 MHz) δ 7.62 (d, *J* = 8.0 Hz, 2H), 7.29 - 7.32 (m, 2H), 7.24 (d, *J* = 8.0 Hz, 2H), 6.94 (t, *J* = 8.4 Hz, 2H), 5.31 (s, 1H), 5.19 (s, 1H), 4.22 (s, 2H), 3.77 (s, 2H), 2.42 (s, 3H), 1.52 (s, 3H), 1.39 - 1.42 (m, 2H), 1.30 - 1.33 (m, 2H). <sup>13</sup>C NMR (CDCl<sub>3</sub>, TMS, 100 MHz) δ 188.7, 162.4 (d, *J* = 245.0 Hz), 143.0, 142.0, 137.1, 135.0 (d, *J* = 2.9 Hz), 129.4, 128.3 (d, *J* = 8.0 Hz), 127.2, 116.2, 115.0 (d, *J* = 20.0 Hz), 97.7, 77.5, 51.7, 51.2, 21.4, 16.9, 6.6. <sup>19</sup>F NMR (376 MHz, CDCl<sub>3</sub>) δ -114.5 (s).

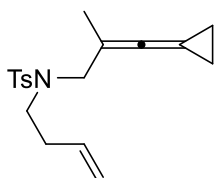

***N*-(but-3-en-1-yl)-*N*-(3-cyclopropylidene-2-methyl-3λ<sup>5</sup>-allyl)-4-methylbenzenesulfonamide (1g)**

This is a known compound and its spectroscopic data are consistent with those reported in the previous literature,<sup>[7]</sup> 53% yield, 168.2 mg. <sup>1</sup>H NMR (CDCl<sub>3</sub>, TMS, 400 MHz) δ 7.69 (d, *J* = 8.4 Hz, 2H), 7.28 (d, *J* = 8.4 Hz, 2H), 5.62 - 5.73 (m, 1H), 4.99 - 5.03 (m, 1H), 4.97 - 4.99 (m, 1H), 3.81 (m,

2H), 3.18 - 3.22 (m, 2H), 2.41 (s, 3H), 2.26 (q,  $J = 8.4$  Hz, 2H), 1.73 (s, 3H), 1.43-1.47 (m, 2H), 1.36-1.41 (m, 2H).  $^{13}\text{C}$  NMR ( $\text{CDCl}_3$ , TMS, 100 MHz)  $\delta$  188.7, 143.0, 137.2, 135.0, 129.5, 127.1, 116.7, 97.5, 77.5, 52.5, 46.9, 32.5, 21.4, 16.9, 6.9.

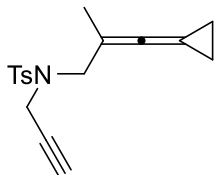

***N*-(3-cyclopropylidene-2-methyl-3 $\lambda^5$ -allyl)-4-methyl-*N*-(prop-2-yn-1-yl)benzenesulfonamide (1h)**

This is a known compound and its spectroscopic data are consistent with those reported in the previous literature,<sup>[8]</sup> 49% yield, 147.7 mg.  $^1\text{H}$  NMR ( $\text{CDCl}_3$ , TMS, 400 MHz)  $\delta$  7.73 (d,  $J = 8.0$  Hz, 2H), 7.28 (d,  $J = 8.0$  Hz, 2H), 4.14 (s, 2H), 3.82 (s, 2H), 2.41 (s, 3H), 1.92 (t,  $J = 2.4$  Hz, 1H), 1.77 (s, 3H), 1.45 - 1.48 (m, 2H), 1.39 - 1.43 (m, 2H).  $^{13}\text{C}$  NMR ( $\text{CDCl}_3$ , TMS, 100 MHz)  $\delta$  188.9, 143.4, 136.1, 129.3, 127.7, 96.2, 77.7, 76.5, 73.4, 50.7, 35.4, 21.5, 16.7, 7.2.

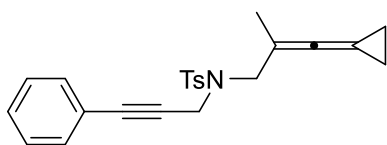

***N*-(3-cyclopropylidene-2-methyl-3 $\lambda^5$ -allyl)-4-methyl-*N*-(3-phenylprop-2-yn-1-yl)benzenesulfonamide (1i)**

This is a known compound and its spectroscopic data are consistent with those reported in the previous literature,<sup>[8]</sup> 43% yield, 162.3 mg.  $^1\text{H}$  NMR ( $\text{CDCl}_3$ , TMS, 400 MHz)  $\delta$  7.78 - 7.76 (m, 2H), 7.26 - 7.20 (m, 5H), 7.00 - 6.98 (m, 2H), 4.35 (s, 2H), 3.89 (s, 2H), 2.31 (s, 3H), 1.83 (s, 3H), 1.48 - 1.43 (m, 2H), 1.42 - 1.36 (m, 2H).  $^{13}\text{C}$  NMR ( $\text{CDCl}_3$ , TMS, 100 MHz)  $\delta$  189.0, 143.3, 136.1, 131.4, 129.4, 128.2, 128.0, 127.8, 122.4, 96.4, 85.4, 81.8, 51.0, 36.4, 21.4, 16.8, 7.2.

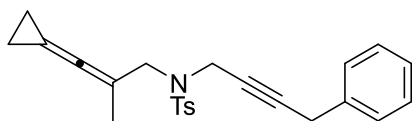

***N*-(3-cyclopropylidene-2-methyl-3 $\lambda^5$ -allyl)-4-methyl-*N*-(4-phenylbut-2-yn-1-yl)benzenesulfonamide (1j)**

This is a known compound and its spectroscopic data are consistent with those reported in the previous literature,<sup>[8]</sup> 48% yield, 187.9 mg. <sup>1</sup>H NMR (CDCl<sub>3</sub>, TMS, 400 MHz) δ 7.72 (d, *J* = 8.0 Hz, 2H), 7.16 - 7.25 (m, 3H), 7.15 (d, *J* = 8.0 Hz, 2H), 7.04 (d, *J* = 8.4 Hz, 2H), 4.18 (s, 2H), 3.83 (s, 2H), 3.26 (s, 2H), 2.30 (s, 3H), 1.78 (s, 3H), 1.41 - 1.44 (m, 2H), 1.30 - 1.32 (m, 2H); <sup>13</sup>C NMR (CDCl<sub>3</sub>, TMS, 100 MHz) δ 188.9, 143.1, 136.19, 136.16, 129.2, 128.3, 127.8, 127.6, 126.5, 96.4, 83.1, 77.5, 74.6, 50.8, 35.9, 24.8, 21.4, 16.7, 7.1.

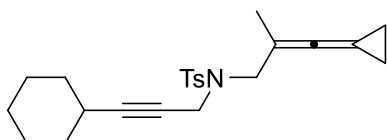

***N*-(3-cyclohexylprop-2-yn-1-yl)-*N*-(3-cyclopropylidene-2-methyl-3λ<sup>5</sup>-allyl)-4-methylbenzenesulfonamide (1k)**

This is a known compound and its spectroscopic data are consistent with those reported in the previous literature,<sup>[8]</sup> 40% yield, 153.4 mg. <sup>1</sup>H NMR (CDCl<sub>3</sub>, TMS, 400 MHz) δ 7.73 (d, *J* = 8.4 Hz, 2H), 7.27 (d, *J* = 7.2 Hz, 2H), 4.13 (d, *J* = 2.0 Hz, 2H), 3.83 (s, 2H), 2.40 (s, 3H), 2.05 (s, 1H), 1.79 (s, 3H), 1.38 - 1.49 (m, 9H), 1.02 - 1.18 (m, 5H); <sup>13</sup>C NMR (CDCl<sub>3</sub>, TMS, 100 MHz) δ 188.9, 143.0, 136.4, 129.3, 127.7, 96.5, 90.0, 77.4, 72.1, 50.5, 36.0, 32.1, 28.5, 25.8, 24.4, 21.4, 16.8, 7.1.

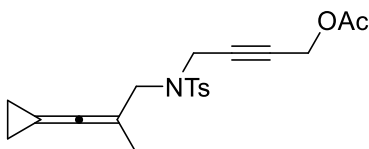

**4-((*N*-(3-cyclopropylidene-2-methyl-3λ<sup>5</sup>-allyl)-4-methylphenyl)sulfonamido)but-2-yn-1-yl acetate (1l)**

This is a known compound and its spectroscopic data are consistent with those reported in the previous literature,<sup>[8]</sup> 33% yield, 123.3 mg. <sup>1</sup>H NMR (CDCl<sub>3</sub>, TMS, 400 MHz) δ 7.73 (d, *J* = 8.0 Hz, 2H), 7.29 (d, *J* = 7.6 Hz, 2H), 4.33 (s, 2H), 4.16 (s, 2H), 3.79 (s, 2H), 2.42 (s, 3H), 2.04 (s, 3H), 1.77 (s, 3H), 1.46 - 1.49 (m, 2H), 1.40 - 1.43 (m, 2H); <sup>13</sup>C NMR (CDCl<sub>3</sub>, TMS, 100 MHz) δ 188.8, 169.8, 143.3, 136.0, 129.2, 127.7, 96.2, 79.4, 79.1, 77.6, 51.7, 50.9, 35.6, 21.4, 20.5, 16.7, 7.1.



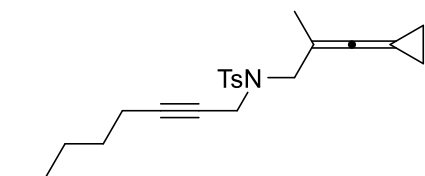

***N*-(3-cyclopropylidene-2-methyl-3 $\lambda^5$ -allyl)-4-methyl-*N*-(oct-2-yn-1-yl)benzenesulfonamide (1m)**

This is a known compound and its spectroscopic data are consistent with those reported in the previous literature,<sup>[8]</sup> 45% yield, 167.2 mg. <sup>1</sup>H NMR (CDCl<sub>3</sub>, TMS, 400 MHz)  $\delta$  7.73 (d,  $J$  = 7.2 Hz, 2H), 7.27 (d,  $J$  = 8.0 Hz, 2H), 4.11 (s, 2H), 3.81 (s, 2H), 2.40 (s, 3H), 1.83 (t,  $J$  = 6.0 Hz, 2H), 1.78 (s, 3H), 1.44 - 1.48 (m, 2H), 1.38 - 1.42 (m, 2H), 1.12 - 1.22 (m, 6H), 0.84 (t,  $J$  = 6.8 Hz, 3H); <sup>13</sup>C NMR (CDCl<sub>3</sub>, TMS, 100 MHz)  $\delta$  188.8, 143.0, 136.3, 129.1, 127.8, 96.5, 85.8, 77.4, 72.2, 50.5, 35.9, 30.7, 27.9, 22.0, 21.4, 18.3, 16.7, 13.8, 7.1.

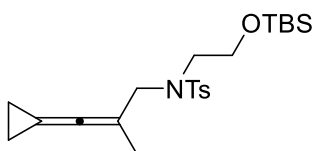

***N*-(2-((tert-butyldimethylsilyl)oxy)ethyl)-*N*-(3-cyclopropylidene-2-methyl-3 $\lambda^5$ -allyl)-4-methylbenzenesulfonamide (1n)**

A colorless oil, 44%, 185.5 mg. <sup>1</sup>H NMR (CDCl<sub>3</sub>, TMS, 400 MHz)  $\delta$  7.71 (d,  $J$  = 8.2 Hz, 2H), 7.30 - 7.27 (m, 2H), 3.86 (s, 2H), 3.73 (t,  $J$  = 6.9 Hz, 2H), 3.23 (t,  $J$  = 6.9 Hz, 2H), 2.41 (s, 3H), 1.72 (s, 3H), 1.46 - 1.42 (m, 2H), 1.38 - 1.35 (m, 2H), 0.85 (s, 9H), 0.01 (s, 6H). <sup>13</sup>C NMR (CDCl<sub>3</sub>, TMS, 100 MHz)  $\delta$  188.6, 143.0, 137.2, 129.5, 127.2, 97.9, 77.7, 61.7, 53.7, 49.0, 31.9, 29.7, 29.4, 25.8, 22.7, 21.5, 18.2, 16.9, 14.1, 7.0, -5.5. IR (neat)  $\nu$  2921, 2851, 1710, 1609, 1586, 1431, 1317, 1061, 1024, 998, 916 cm<sup>-1</sup>. HRMS (ESI) calcd. for C<sub>22</sub>H<sub>35</sub>NO<sub>3</sub>NaSiS (M+Na): 444.1999, Found: 444.1996.

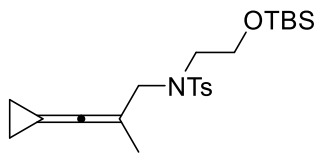

<sup>1</sup>H NMR (CDCl<sub>3</sub>, 400 MHz, TMS)

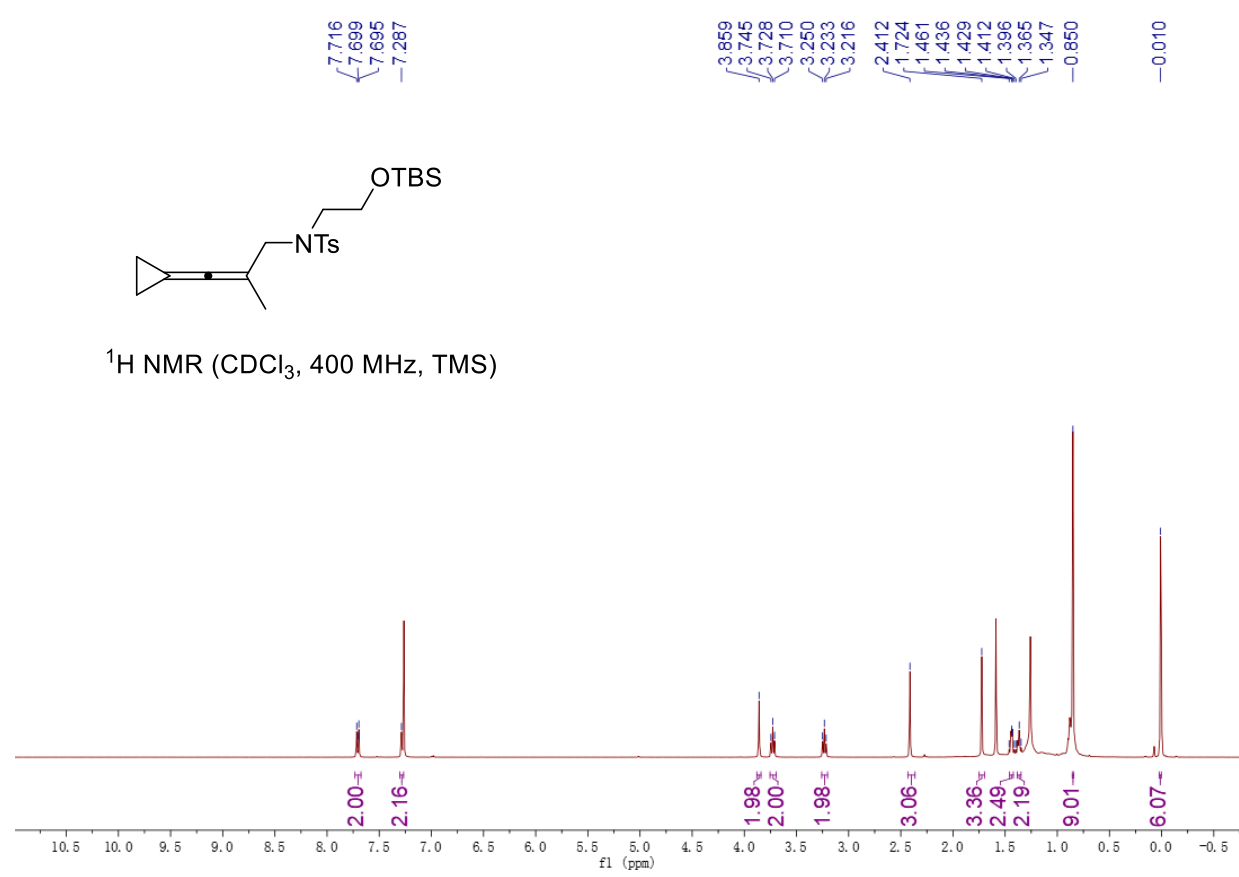

<sup>13</sup>C NMR (CDCl<sub>3</sub>, 100 MHz, TMS)

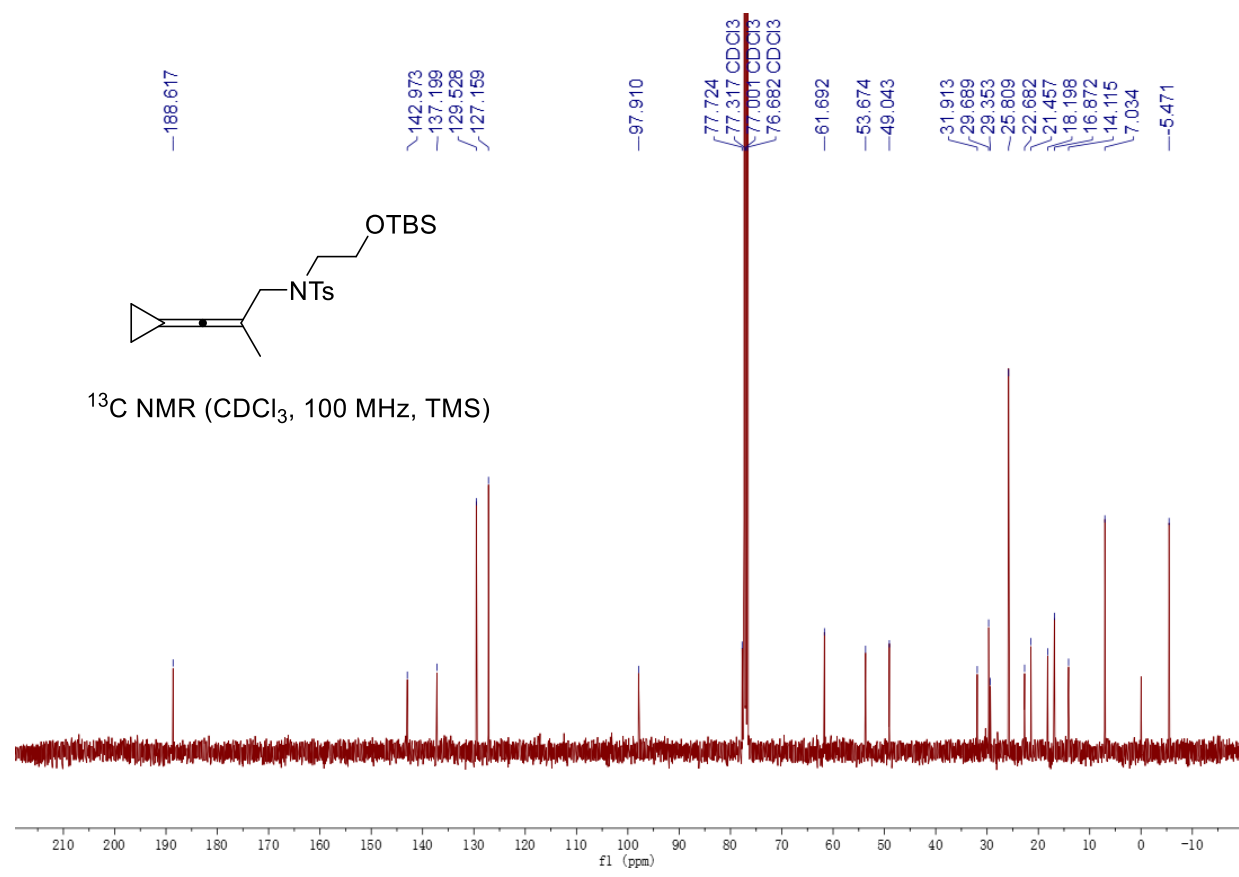

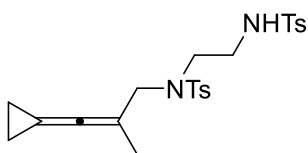

***N*-(3-cyclopropylidene-2-methyl-3-allyl)-4-methyl-*N*-(2-((4-methylphenyl)sulfonamido)ethyl)benzenesulfonamide (10)**

A colorless oil, 40% yield, 184.2 mg.  $^1\text{H}$  NMR ( $\text{CDCl}_3$ , TMS, 400 MHz)  $\delta$  7.76 (d,  $J = 8.3$  Hz, 2H), 7.62 (d,  $J = 8.3$  Hz, 2H), 7.34 - 7.25 (m, 4H), 5.14 (s, 1H), 3.67 (s, 2H), 3.19 - 3.10 (m, 4H), 2.43 (d,  $J = 7.4$  Hz, 6H), 1.49 - 1.33 (m, 4H).  $^{13}\text{C}$  NMR ( $\text{CDCl}_3$ , TMS, 150 MHz)  $\delta$  188.6, 143.6, 143.4, 136.8, 135.7, 129.73, 129.66, 127.20, 127.16, 97.3, 78.2, 54.0, 47.6, 42.2, 21.48, 21.47, 16.8, 7.2. IR (neat)  $\nu$  3026, 2964, 1712, 1644, 1359, 1316, 1219, 1090, 774, 698  $\text{cm}^{-1}$ . HRMS (ESI) calcd. for  $\text{C}_{23}\text{H}_{28}\text{N}_2\text{O}_4\text{S}_2\text{Na}$  ( $\text{M}+\text{Na}$ ): 483.1383, Found: 483.1382.

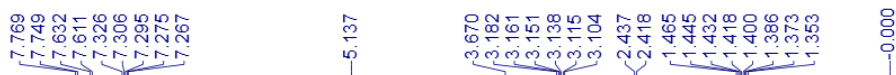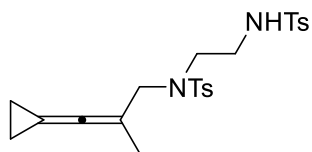

$^1\text{H}$  NMR ( $\text{CDCl}_3$ , 400 MHz, TMS)

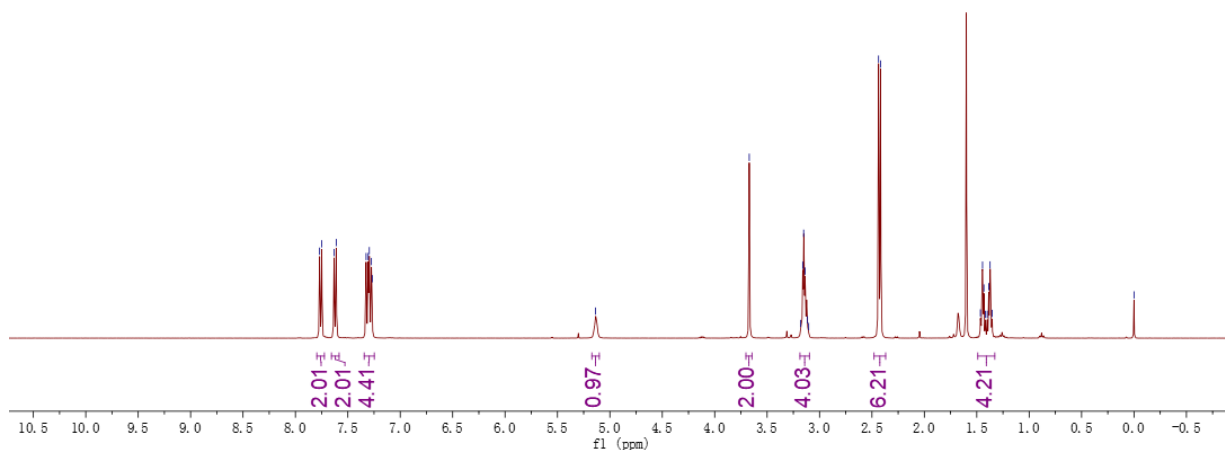

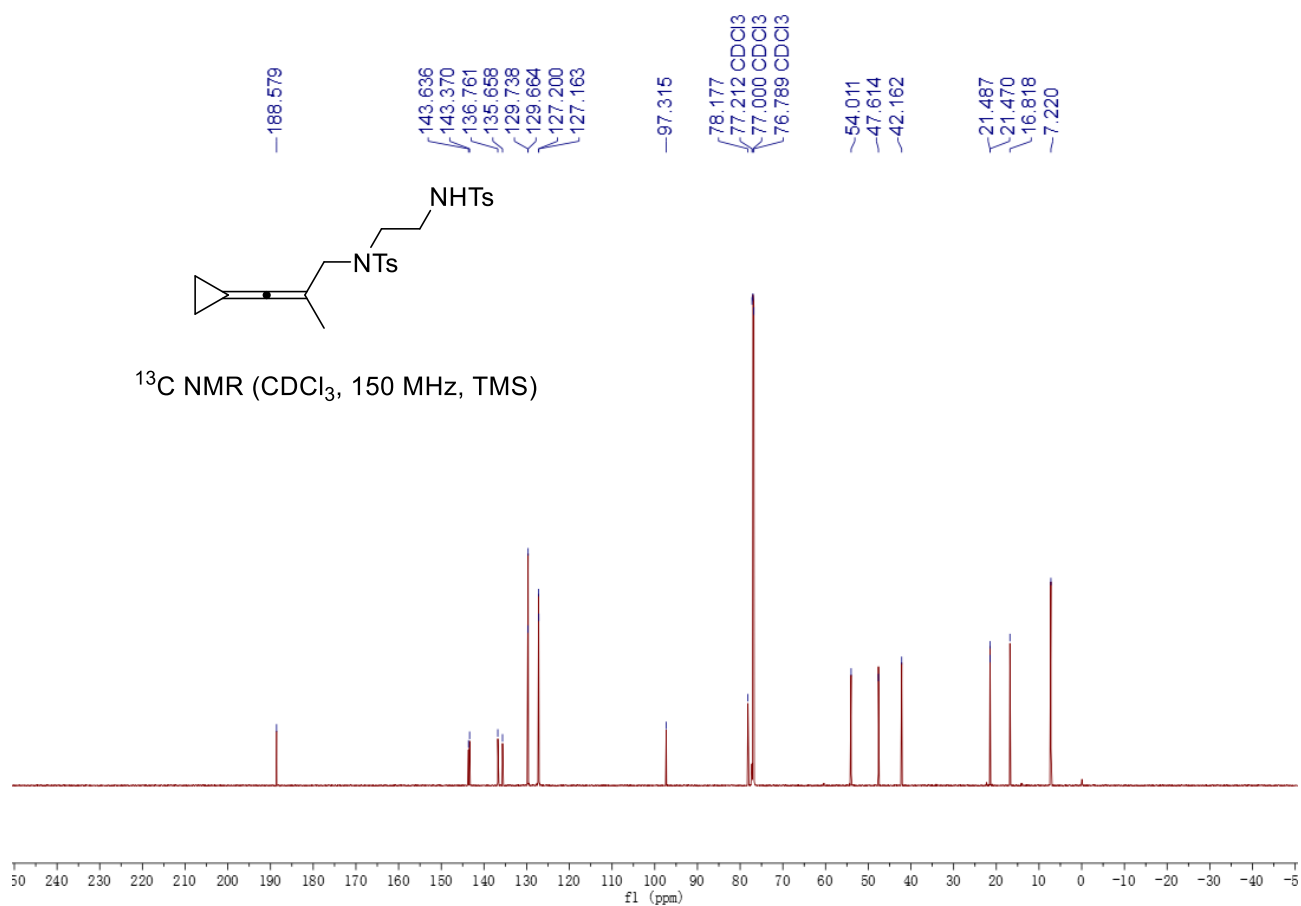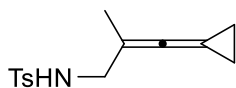

***N*-(3-cyclopropylidene-2-methyl-3-allyl)-4-methylbenzenesulfonamide (1p)**

A colorless oil, 38% yield, 100.1 mg. <sup>1</sup>H NMR (CDCl<sub>3</sub>, TMS, 400 MHz) δ 7.74 (d, *J* = 8.2 Hz, 2H), 7.30 (d, *J* = 8.0 Hz, 2H), 4.48 (s, 1H), 3.53 (d, *J* = 5.3 Hz, 2H), 2.43 (s, 3H), 1.69 (s, 3H), 1.45 (s, 4H). <sup>13</sup>C NMR (CDCl<sub>3</sub>, TMS, 100 MHz) δ 185.8, 143.3, 136.9, 129.6, 127.1, 98.8, 80.6, 46.1, 21.5, 17.3, 7.1. IR (neat) ν 2917, 1694, 1511, 1477, 1464, 1396, 317, 1169, 1048, 964, 833 cm<sup>-1</sup>. HRMS (ESI) calcd. for C<sub>14</sub>H<sub>17</sub>NO<sub>2</sub>NaS (M+Na): 286.0872, Found: 286.0873.

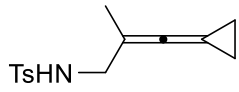

$^1\text{H}$  NMR ( $\text{CDCl}_3$ , 400 MHz, TMS)

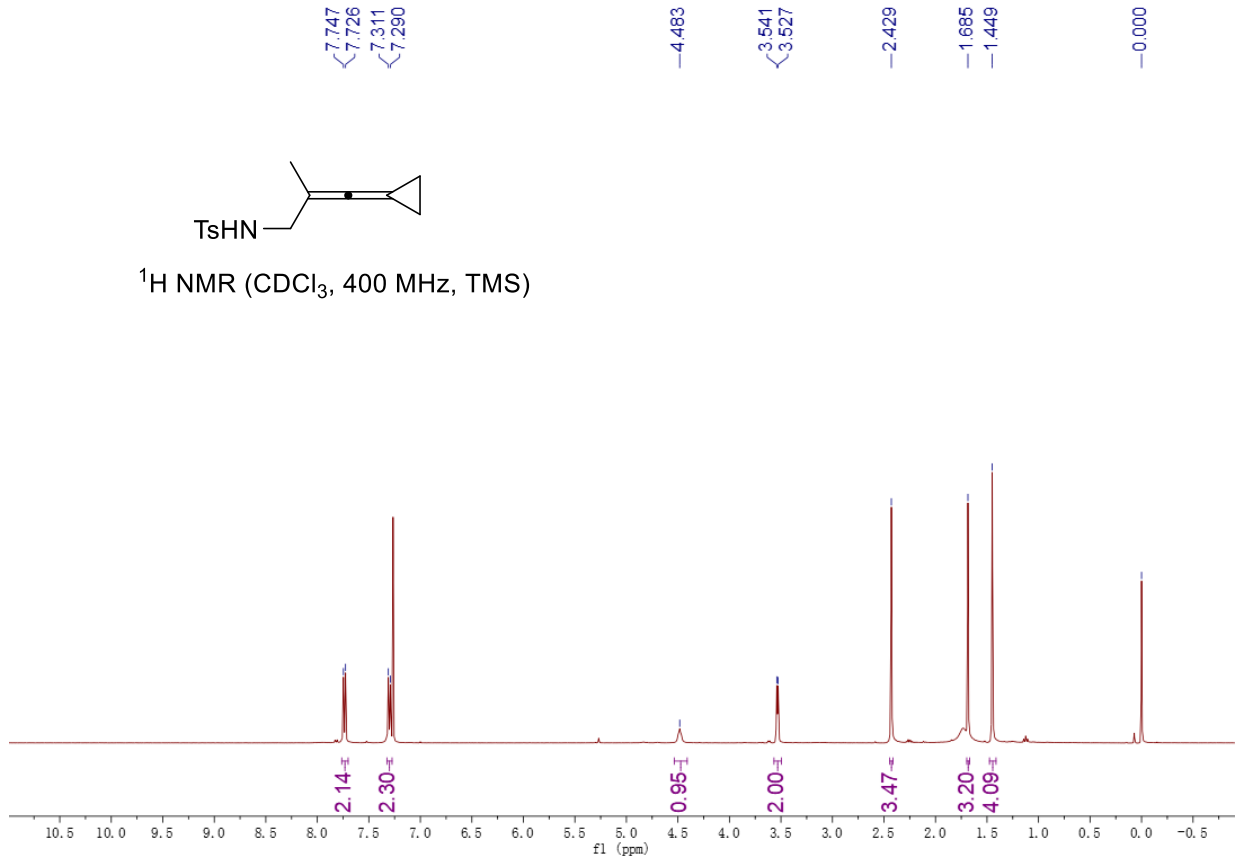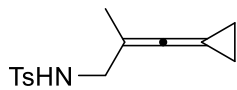

$^{13}\text{C}$  NMR ( $\text{CDCl}_3$ , 100 MHz, TMS)

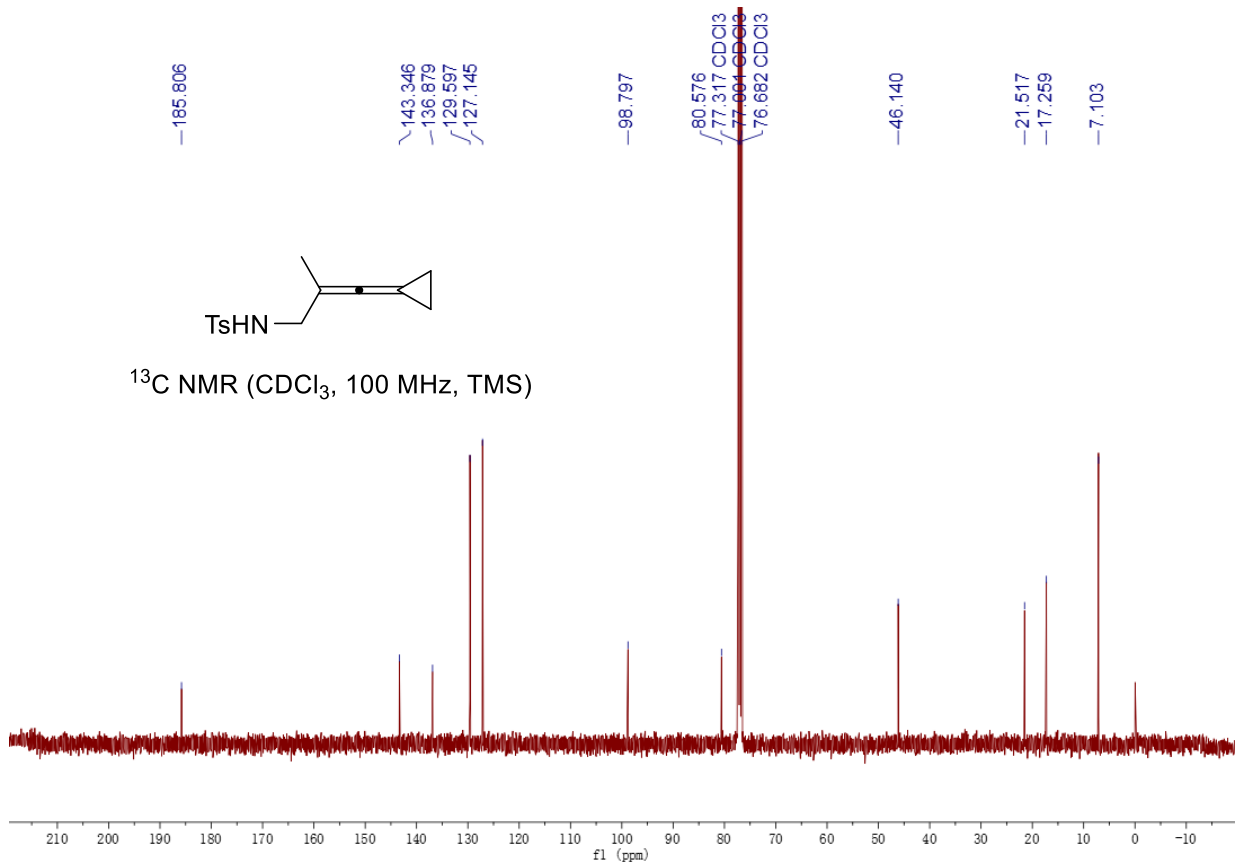

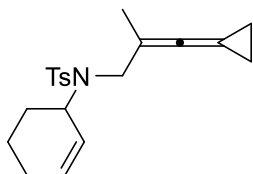

***N*-(cyclohex-2-en-1-yl)-*N*-(3-cyclopropylidene-2-methyl-3 $\lambda$ <sup>5</sup>-allyl)-4-methylbenzenesulfonamide (**1q**)**

A colorless oil, 22% yield, 75.6 mg. <sup>1</sup>H NMR (CDCl<sub>3</sub>, TMS, 400 MHz)  $\delta$  7.71 (d,  $J$  = 8.3 Hz, 2H), 7.27 (d,  $J$  = 7.9 Hz, 2H), 5.80 - 5.70 (m, 1H), 5.06 (d,  $J$  = 10.2 Hz, 1H), 4.50 - 4.40 (m, 1H), 3.94 (d,  $J$  = 15.6 Hz, 1H), 3.64 (d,  $J$  = 15.6 Hz, 1H), 2.41 (s, 3H), 1.95 - 1.88 (m, 2H), 1.85 - 1.69 (m, 6H), 1.58 - 1.50 (m, 1H), 1.47 - 1.37 (m, 4H). <sup>13</sup>C NMR (CDCl<sub>3</sub>, TMS, 100 MHz)  $\delta$  188.0, 142.8, 138.4, 132.0, 129.5, 127.3, 127.1, 100.8, 78.5, 55.2, 48.1, 28.4, 24.5, 21.9, 21.5, 17.0, 6.6, 6.5. IR (neat)  $\nu$  2983, 1613, 1512, 1463, 1398, 1385, 1318, 1220, 1033, 765, 713 cm<sup>-1</sup>. HRMS (ESI) calcd. for C<sub>20</sub>H<sub>25</sub>NO<sub>2</sub>NaS (M+Na): 366.1498, Found: 366.1493.

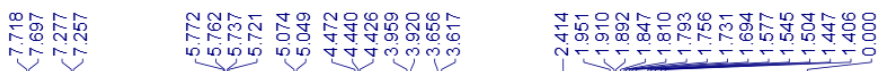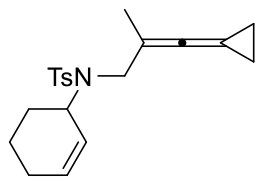

<sup>1</sup>H NMR (CDCl<sub>3</sub>, 400 MHz, TMS)

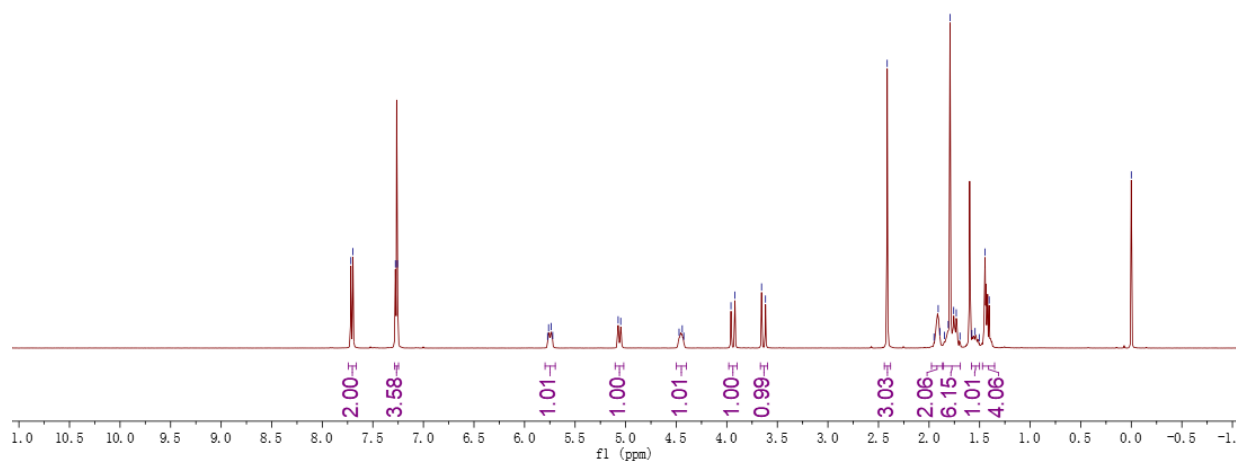

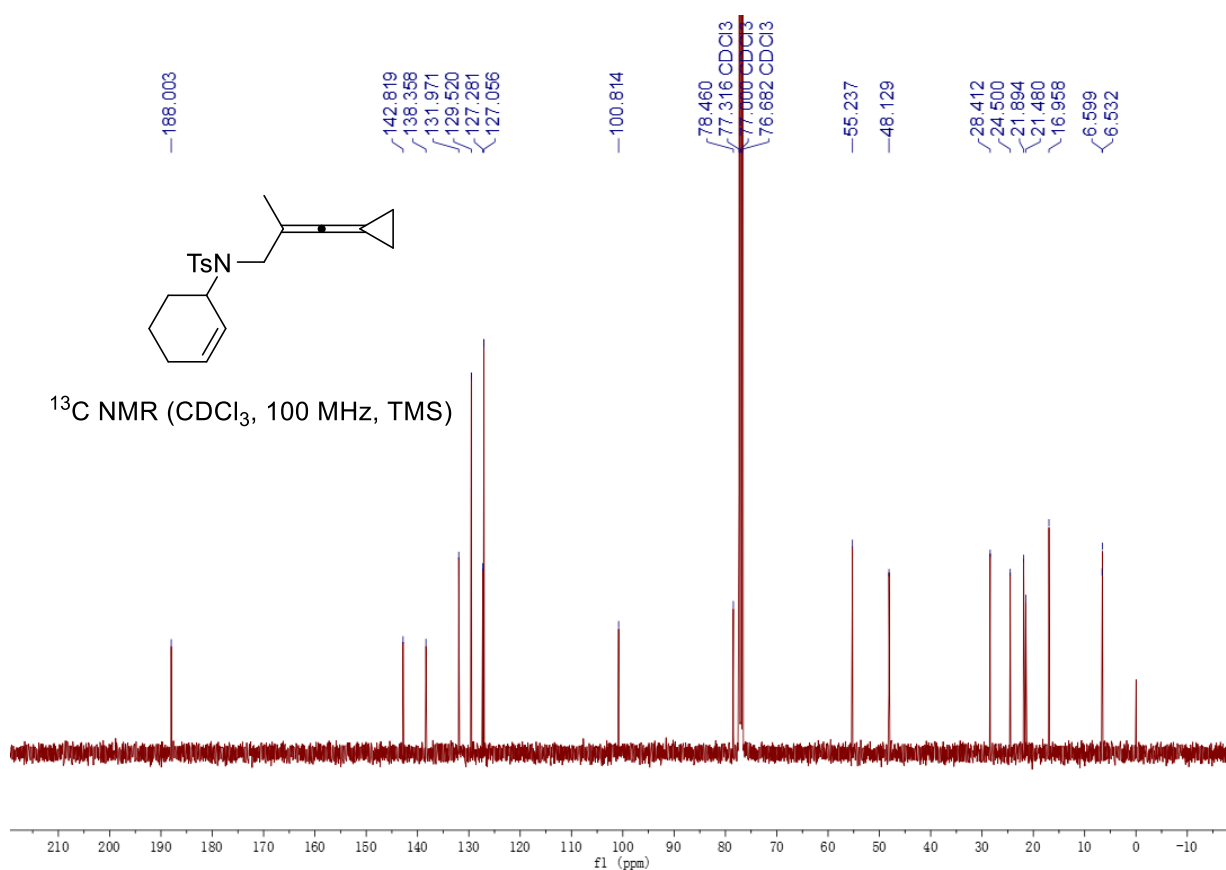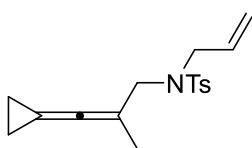

***N*-allyl-*N*-(3-cyclopropylidene-2-methyl-3λ<sup>5</sup>-allyl)-4-methylbenzenesulfonamide (1r)**

This is a known compound and its spectroscopic data are consistent with those reported in the previous literature,<sup>[7]</sup> 51%, 154.7 mg. <sup>1</sup>H NMR (CDCl<sub>3</sub>, TMS, 400 MHz) δ 1.36-1.41 (m, 2H), 1.43-1.47 (m, 2H), 1.73 (s, 3H), 2.26 (q, *J* = 8.4 Hz, 2H), 2.41 (s, 3H), 3.18-3.22 (m, 2H), 3.81 (m, 2H), 4.97-4.99 (m, 1H), 4.99-5.03 (m, 1H), 5.62-5.73 (m, 1H), 7.28 (d, *J* = 8.4 Hz, 2H), 7.69 (d, *J* = 8.4 Hz, 2H). <sup>13</sup>C NMR (CDCl<sub>3</sub>, TMS, 100 MHz) δ 6.9, 16.9, 21.4, 32.5, 46.9, 52.5, 77.5, 97.5, 116.7, 127.1, 129.5, 135.0, 137.2, 143.0, 188.7.

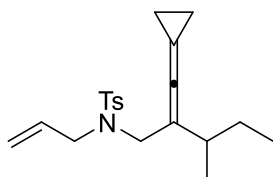

***N*-allyl-*N*-(2-(cyclopropylidene-λ<sup>5</sup>-methylene)-3-methylpentyl)-4-methylbenzenesulfonamide**

**(1s)**

This is a known compound and its spectroscopic data are consistent with those reported in the previous literature,<sup>[9]</sup> 46% yield, 159.0 mg. <sup>1</sup>H NMR (CDCl<sub>3</sub>, TMS, 400 MHz) δ 7.70 (d, *J* = 8.2 Hz, 2H), 7.27 (d, *J* = 8.0 Hz, 2H), 5.58 - 5.48 (m, 1H), 5.13 - 5.06 (m, 2H), 3.86 - 3.81 (m, 4H), 2.42 (s, 3H), 2.03 - 1.98 (m, 1H), 1.50 - 1.40 (m, 3H), 1.37 - 1.24 (m, 3H), 1.00 (d, *J* = 6.8 Hz, 3H), 0.86 (t, *J* = 7.4 Hz, 3H). <sup>13</sup>C NMR (CDCl<sub>3</sub>, TMS, 100 MHz) δ 187.9, 142.9, 137.7, 132.4, 129.5, 127.2, 119.1, 107.1, 79.6, 49.0, 48.6, 35.1, 28.2, 21.5, 19.0, 11.5, 6.9, 6.8.

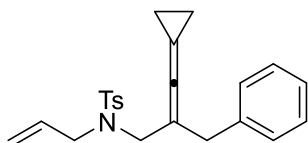***N*-allyl-*N*-(2-benzyl-3-cyclopropylidene-3λ<sup>5</sup>-allyl)-4-methylbenzenesulfonamide (1t)**

This is a known compound and its spectroscopic data are consistent with those reported in the previous literature,<sup>[7]</sup> 48% yield, 174.6 mg. <sup>1</sup>H NMR (CDCl<sub>3</sub>, TMS, 400 MHz) δ 1.35-1.42 (m, 4H), 2.41 (s, 3H), 3.34 (s, 2H), 3.79 (s, 2H), 3.83 (d, *J* = 7.2 Hz, 2H), 5.03 (s, 1H), 5.07 (d, *J* = 8.0 Hz, 1H), 5.46-5.56 (m, 1H), 7.18-7.27 (m, 7H), 7.67 (d, *J* = 8.0 Hz, 2H). <sup>13</sup>C NMR (CDCl<sub>3</sub>, TMS, 100 MHz) δ 7.1, 21.5, 37.0, 49.1, 49.3, 78.9, 101.5, 119.2, 126.1, 127.2, 128.1, 129.0, 129.5, 132.2, 137.5, 143.0, 189.6.

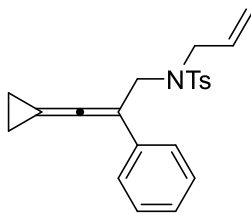***N*-allyl-*N*-(3-cyclopropylidene-2-phenyl-3λ<sup>5</sup>-allyl)-4-methylbenzenesulfonamide (1u)**

A colorless oil, 41% yield, 149.9 mg. <sup>1</sup>H NMR (CDCl<sub>3</sub>, TMS, 400 MHz) δ 7.77 (d, *J* = 8.0 Hz, 2H), 7.43 (d, *J* = 8.0 Hz, 2H), 7.33 - 7.26 (m, 4H), 7.19 (t, *J* = 7.2 Hz, 1H), 5.62 - 5.45 (m, 1H), 5.16 - 4.99 (m, 2H), 4.32 (s, 2H), 3.90 - 3.76 (m, 2H), 2.43 (s, 3H), 1.71 - 1.62 (m, 2H), 1.56 (s, 2H). <sup>13</sup>C NMR (CDCl<sub>3</sub>, TMS, 150 MHz) δ 190.5, 143.1, 137.2, 135.5, 132.3, 129.6, 128.4, 127.4, 126.7, 126.3, 119.0, 103.1, 80.3, 49.2, 47.8, 21.5, 8.4. IR (neat) ν 2996, 2929, 2008, 1596, 1442, 1091, 897, 752 cm<sup>-1</sup>. HRMS (ESI) calcd. for C<sub>22</sub>H<sub>23</sub>NO<sub>2</sub>NaS (M+Na)<sup>+</sup>: 388.1341, Found: 388.1349.



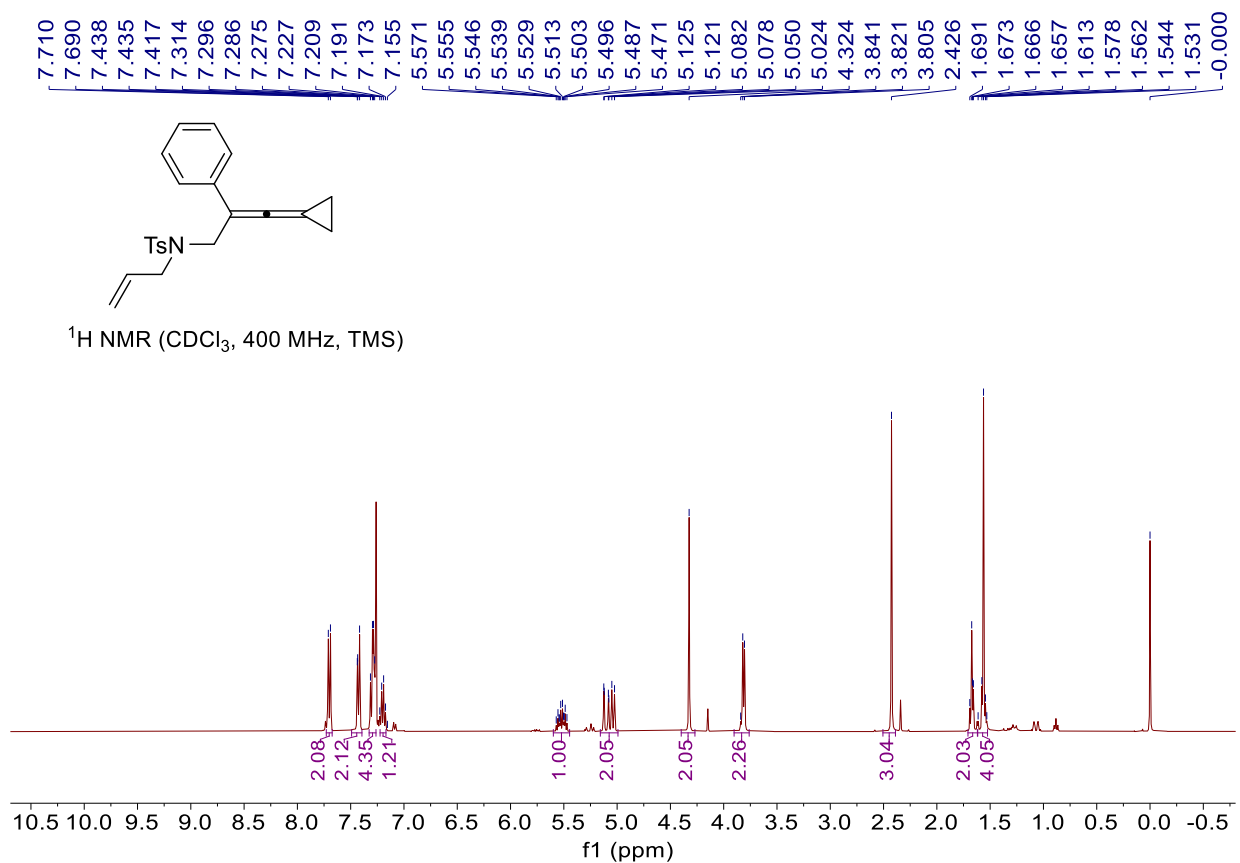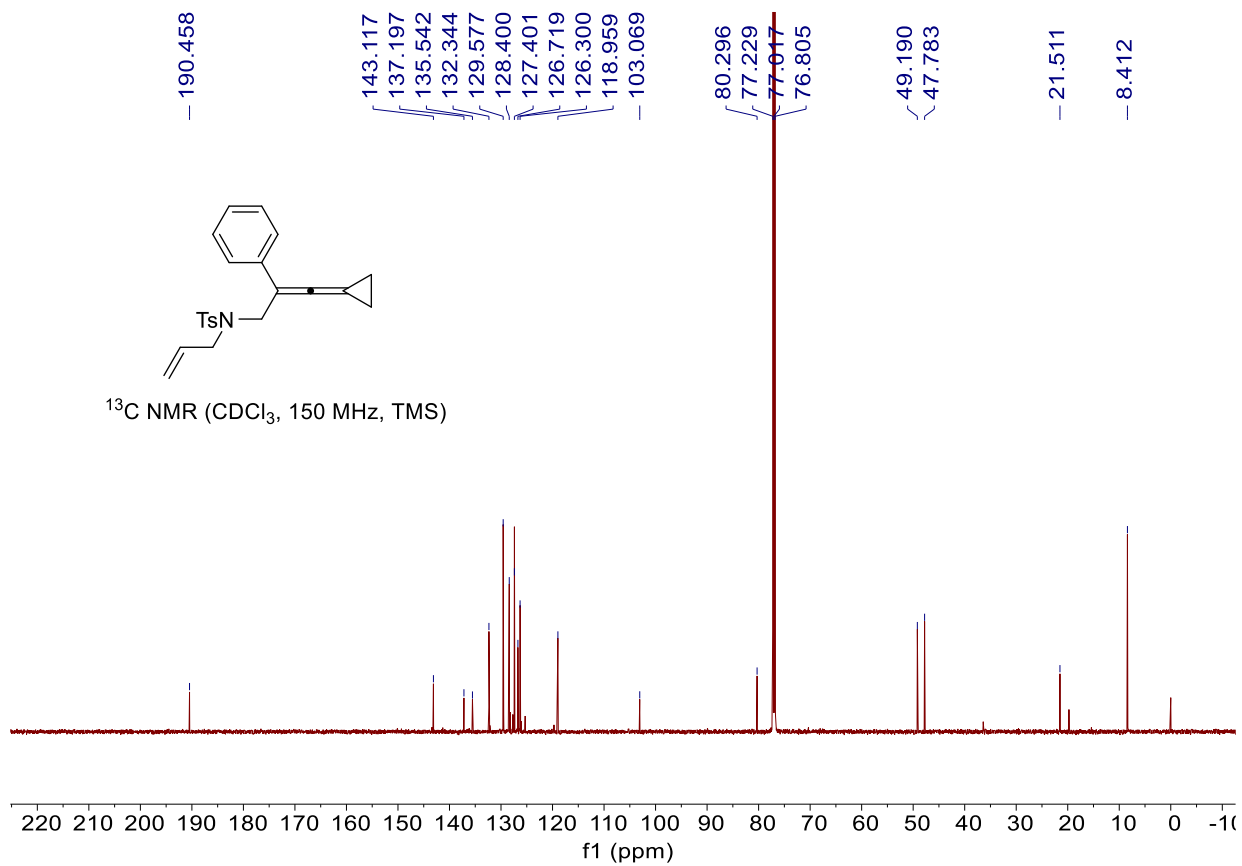

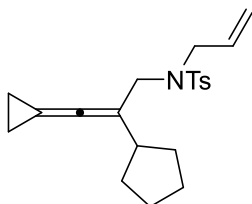

***N*-allyl-*N*-(2-cyclopentyl-3-cyclopropylidene-3λ<sup>5</sup>-allyl)-4-methylbenzenesulfonamide (1v)**

This is a known compound and its spectroscopic data are consistent with those reported in the previous literature,<sup>[9]</sup> 51% yield, 182.3 mg. <sup>1</sup>H NMR (CDCl<sub>3</sub>, TMS, 400 MHz) δ 7.70 (d, *J* = 8.0 Hz, 2H), 7.27 (d, *J* = 8.4 Hz, 2H), 5.54 (td, *J* = 16.8, 6.6 Hz, 1H), 5.14 - 5.06 (m, 2H), 3.86 - 3.82 (m, 4H), 2.42 (s, 3H), 2.39 - 2.33 (m, 1H), 1.85 - 1.77 (m, 2H), 1.65 - 1.59 (m, 2H), 1.53 - 1.50 (m, 2H), 1.46 - 1.43 (m, 2H), 1.39 - 1.33 (m, 4H). <sup>13</sup>C NMR (CDCl<sub>3</sub>, TMS, 100 MHz) δ 187.1, 142.9, 137.6, 132.3, 129.5, 127.2, 125.2, 119.1, 106.6, 105.0, 79.6, 49.5, 49.1, 39.9, 31.8, 29.7, 24.9, 21.5, 6.9.

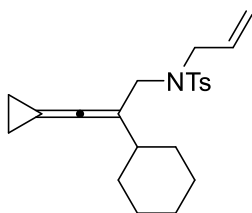

***N*-allyl-*N*-(2-cyclohexyl-3-cyclopropylidene-3λ<sup>5</sup>-allyl)-4-methylbenzenesulfonamide (1w)**

A white solid, this is a known compound and its spectroscopic data are consistent with those reported in the previous literature,<sup>[9]</sup> 46% yield, 170.9 mg, M.P.: 87-89 °C. <sup>1</sup>H NMR (CDCl<sub>3</sub>, TMS, 300 MHz) δ 1.03 - 1.25 (m, 5H), 1.33 - 1.38 (m, 2H), 1.42 - 1.46 (m, 2H), 1.61 - 1.86 (m, 6H), 2.42 (s, 3H), 3.82 (d, *J* = 6.6 Hz, 2H), 3.85 (s, 2H), 5.08 (d, *J* = 8.4 Hz, 1H), 5.11 (d, *J* = 15.3 Hz, 1H), 5.49 - 5.62 (m, 1H), 7.28 (d, *J* = 7.8 Hz, 2H), 7.70 (d, *J* = 7.8 Hz, 2H). <sup>13</sup>C NMR (CDCl<sub>3</sub>, TMS, 75 MHz) δ 7.0, 21.4, 26.2, 26.3, 32.1, 37.7, 48.3, 49.0, 79.3, 107.5, 119.0, 127.2, 129.5, 132.4, 137.6, 142.9, 188.1.

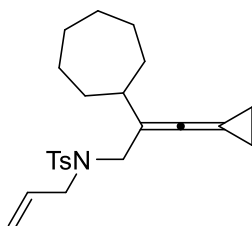

***N*-allyl-*N*-(2-cycloheptyl-3-cyclopropylidene-3λ<sup>5</sup>-allyl)-4-methylbenzenesulfonamide (1x)**

A white solid, 47% yield, 181.2 mg, M.P.: 83-86 °C.  $^1\text{H}$  NMR ( $\text{CDCl}_3$ , TMS, 400 MHz)  $\delta$  7.70 (d,  $J$  = 8.0 Hz, 2H), 7.28 (d,  $J$  = 8.0 Hz, 2H), 5.63 - 5.48 (m, 1H), 5.15 - 5.04 (m, 2H), 3.93 - 3.76 (m, 4H), 2.42 (s, 3H), 2.12 - 1.96 (m, 1H), 1.83 - 1.73 (m, 2H), 1.64 - 1.53 (m, 4H) 1.49 - 1.29 (m, 10H).  $^{13}\text{C}$  NMR ( $\text{CDCl}_3$ , TMS, 100 MHz)  $\delta$  188.0, 143.0, 137.7, 132.5, 129.5, 127.2, 119.0, 108.6, 79.5, 49.1, 48.9, 39.4, 33.7, 28.3, 26.2, 21.5, 7.0. IR (neat)  $\nu$  2922, 2853, 2018, 1598, 1444, 1091, 905, 764  $\text{cm}^{-1}$ . HRMS (ESI) calcd. for  $\text{C}_{23}\text{H}_{31}\text{NO}_2\text{NaS}$  ( $\text{M}+\text{Na}$ ) $^+$ : 408.1967, Found: 408.1972.

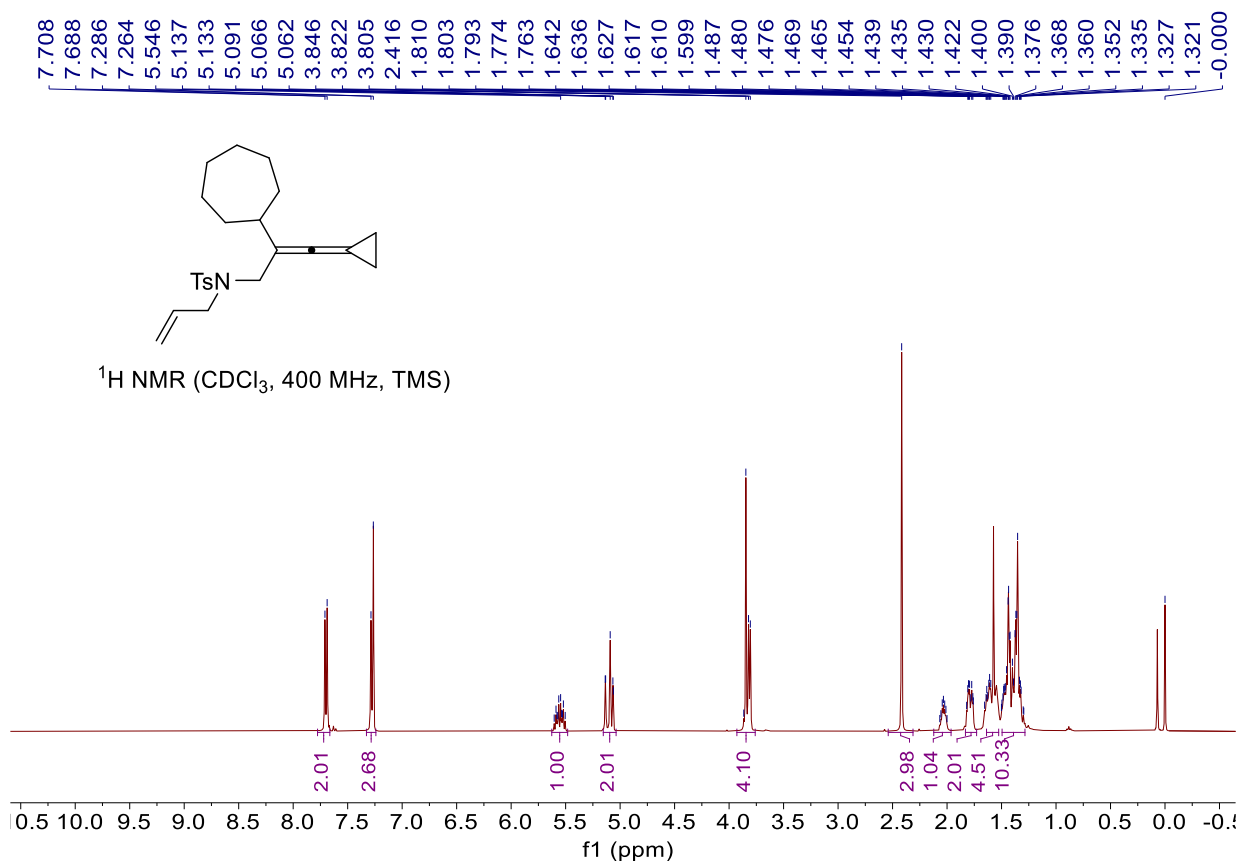

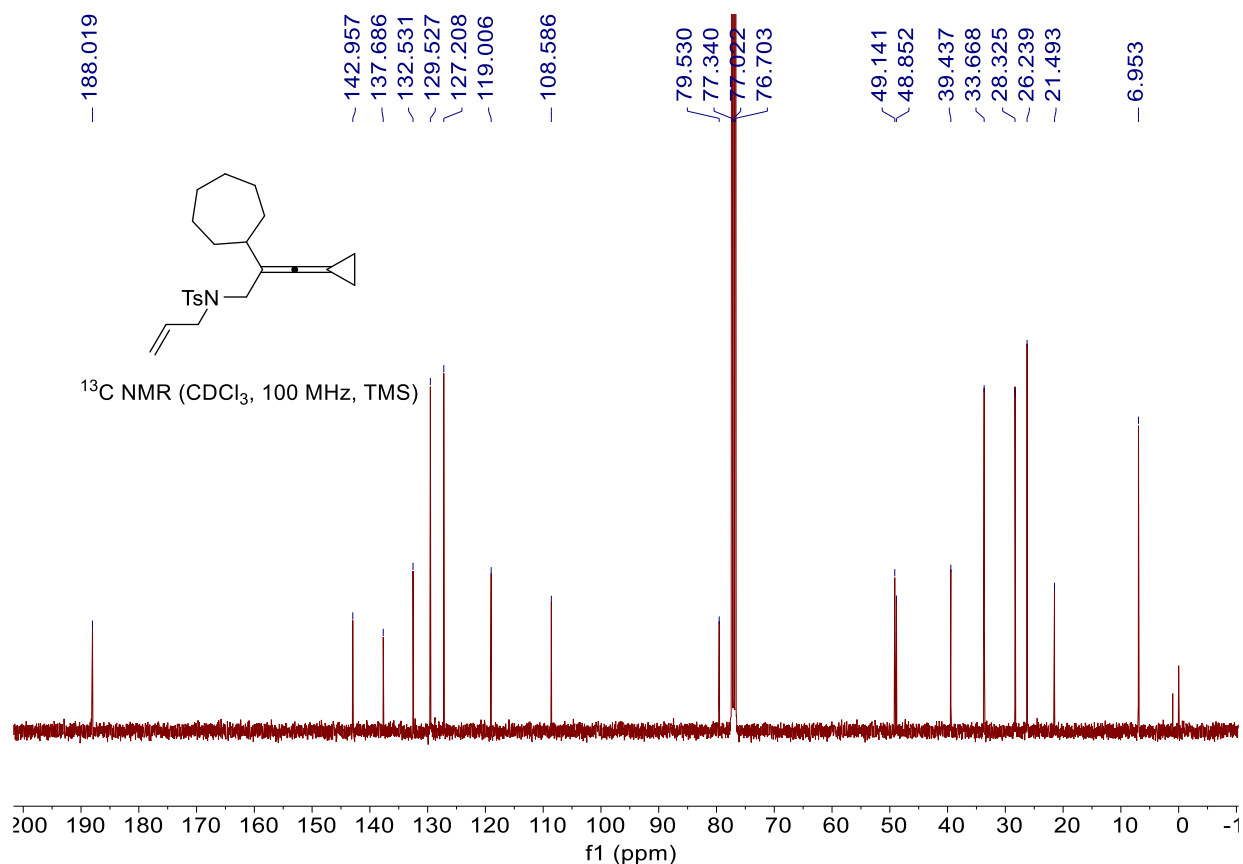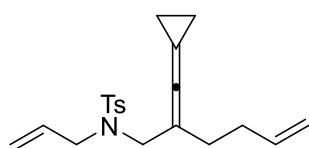

***N*-allyl-*N*-(2-(cyclopropylidene- $\lambda^5$ -methylene)hex-5-en-1-yl)-4-methylbenzenesulfonamide (1y)**

A colorless oil, 39% yield, 134.0 mg. <sup>1</sup>H NMR (CDCl<sub>3</sub>, TMS, 400 MHz)  $\delta$  7.70 (d,  $J$  = 8.2 Hz, 2H), 7.28 (d,  $J$  = 8.3 Hz, 2H), 5.87 - 5.72 (m, 1H), 5.61 - 5.45 (m, 1H), 5.16 - 5.04 (m, 2H), 5.03 - 4.90 (m, 2H), 3.83 (s, 4H), 2.42 (s, 3H), 2.19 - 2.11 (m, 2H), 2.11 - 2.04 (m, 2H), 1.47 - 1.36 (m, 4H). <sup>13</sup>C NMR (CDCl<sub>3</sub>, TMS, 100 MHz)  $\delta$  188.5, 143.0, 138.3, 137.6, 132.2, 129.5, 127.2, 119.2, 114.6, 101.5, 79.2, 49.9, 49.1, 31.6, 29.3, 21.5, 7.0. IR (Acetone)  $\nu$  2923, 1710, 1597, 1461, 1396, 1220, 1025, 991, 890, 803, 697 cm<sup>-1</sup>. HRMS (ESI) calcd. for C<sub>20</sub>H<sub>25</sub>NO<sub>2</sub>NaS (M+Na): 366.1492, Found: 366.1502.

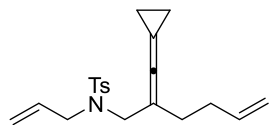

$^1\text{H}$  NMR ( $\text{CDCl}_3$ , 400 MHz, TMS)

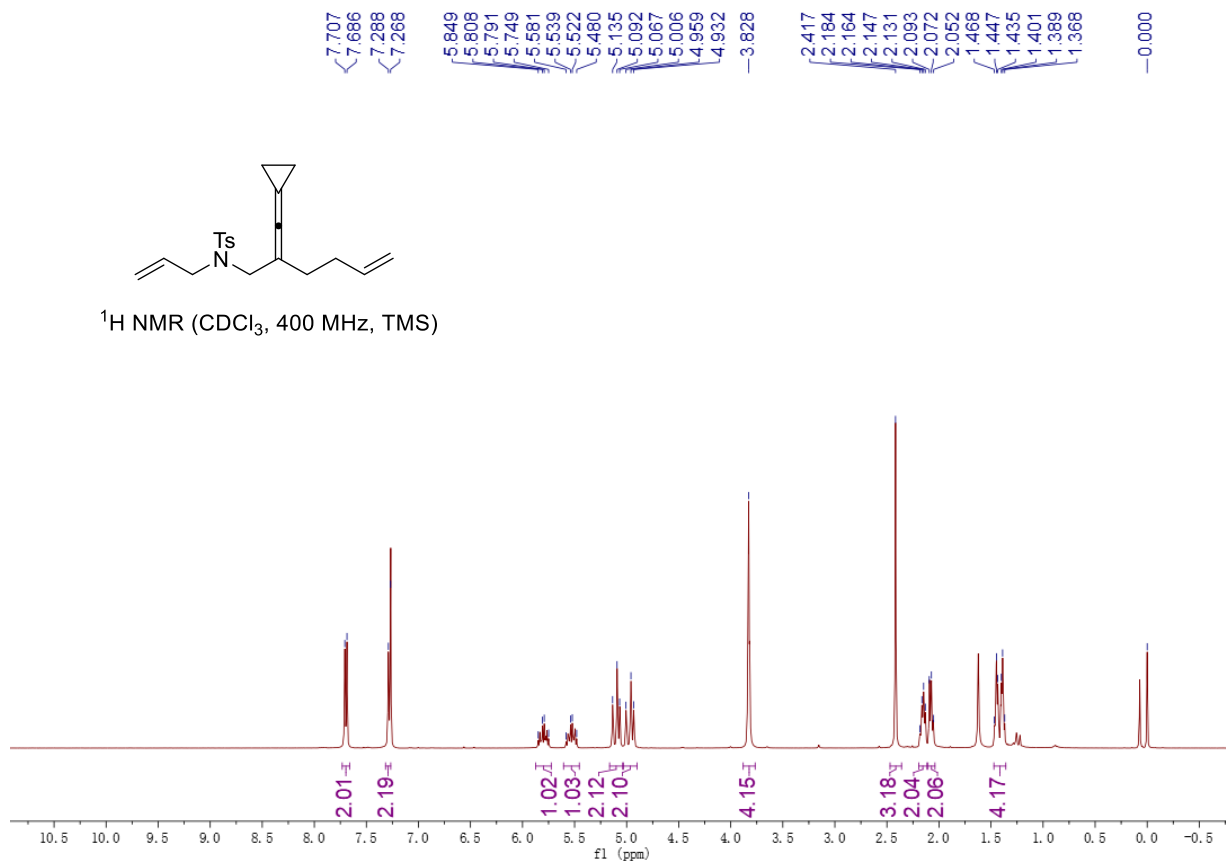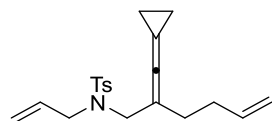

$^{13}\text{C}$  NMR ( $\text{CDCl}_3$ , 100 MHz, TMS)

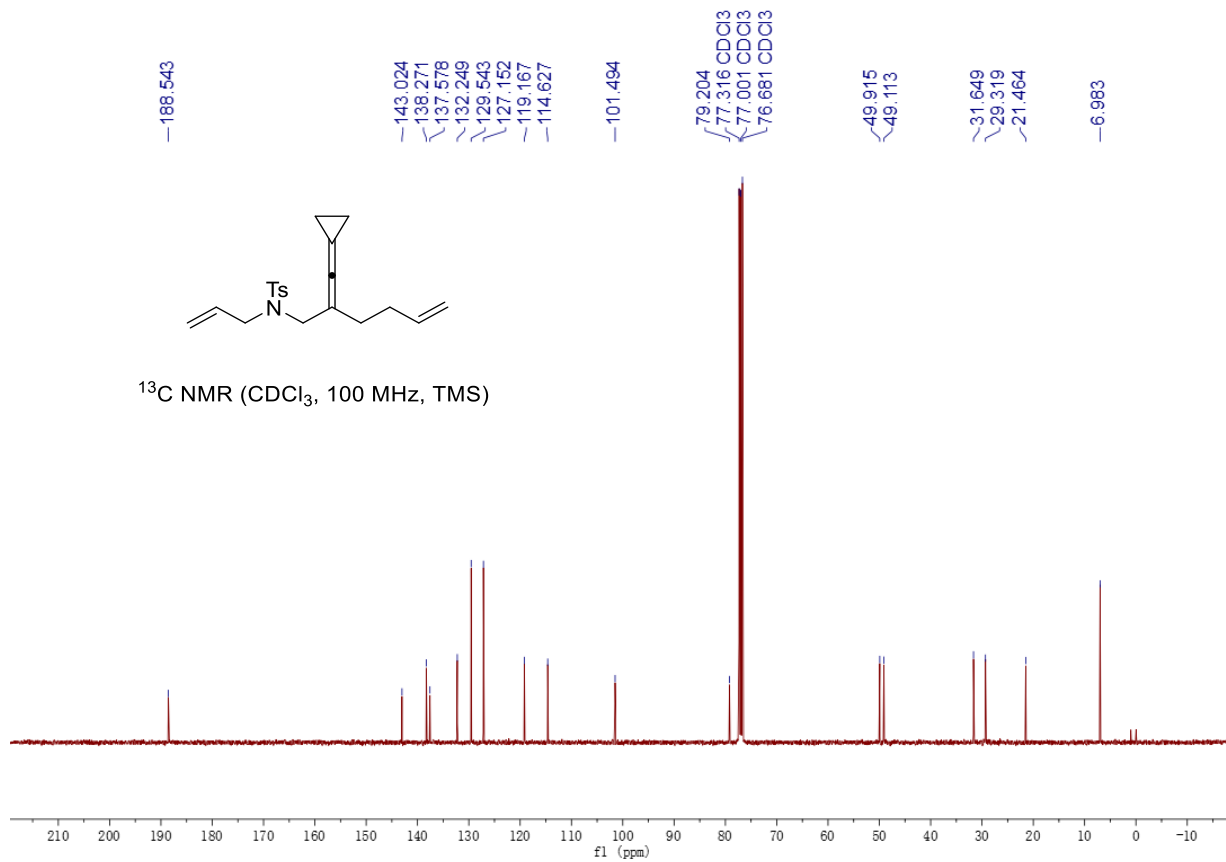

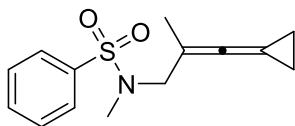

***N*-(3-cyclopropylidene-2-methyl-3λ<sup>5</sup>-allyl)-*N*-methylbenzenesulfonamide (1aa)**

A colorless oil, 50% yield, 131.7 mg. <sup>1</sup>H NMR (CDCl<sub>3</sub>, TMS, 400 MHz) δ 7.79 (d, *J* = 7.3 Hz, 2H), 7.63 - 7.48 (m, 3H), 3.62 (s, 2H), 2.70 (s, 3H), 1.79 (s, 3H), 1.48 - 1.42 (m, 2H), 1.41 - 1.36 (m, 2H). <sup>13</sup>C NMR (CDCl<sub>3</sub>, TMS, 100 MHz) δ 188.8, 137.4, 132.5, 129.0, 127.4, 97.1, 77.5, 54.7, 46.9, 33.8, 16.7, 7.0. IR (neat) ν 2921, 2855, 1711, 1488, 1396, 1332, 1219, 1034, 991, 790, 759 cm<sup>-1</sup>. HRMS (ESI) calcd. for C<sub>14</sub>H<sub>17</sub>NO<sub>2</sub>NaS (M+Na): 286.0872, Found: 286.0873.

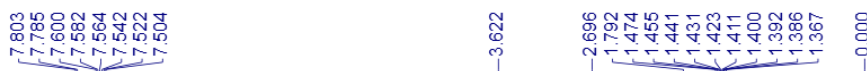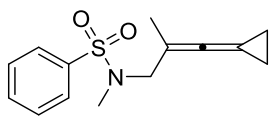

<sup>1</sup>H NMR (CDCl<sub>3</sub>, 400 MHz, TMS)

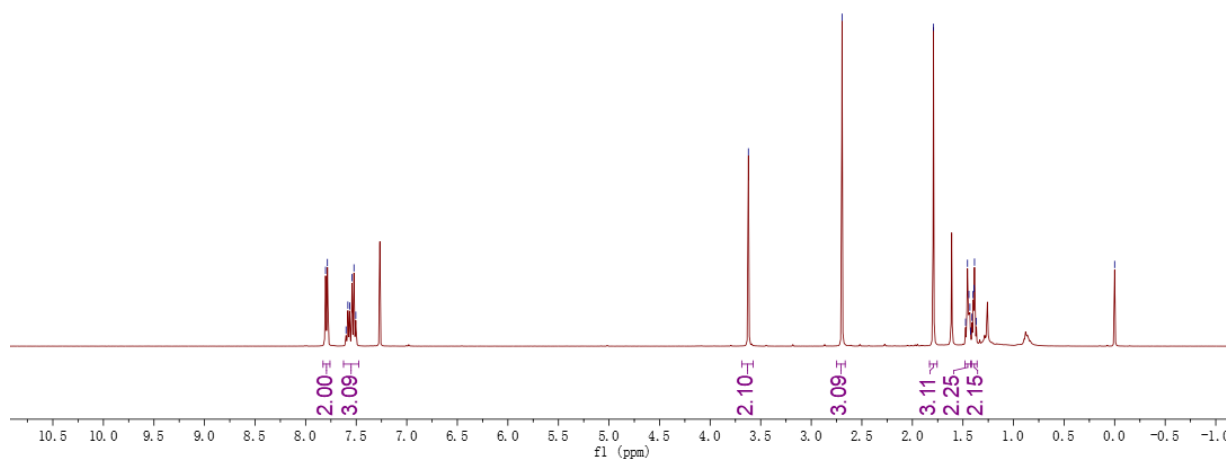

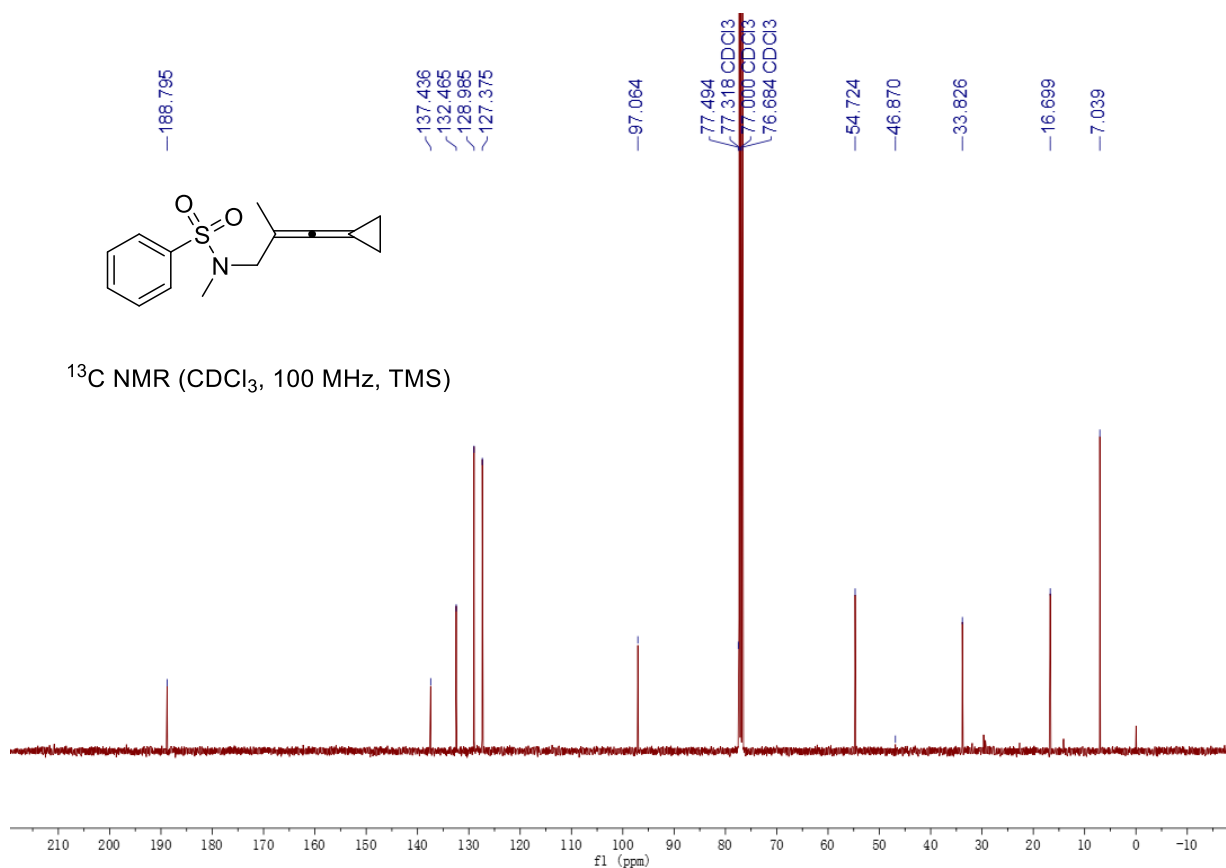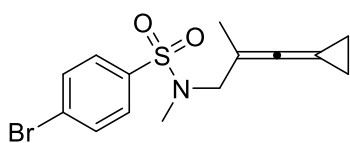

**4-bromo-*N*-(3-cyclopropylidene-2-methyl-3-allyl)-*N*-methylbenzenesulfonamide (1ab)**

A colorless oil, 43% yield, 147.2 mg. <sup>1</sup>H NMR (CDCl<sub>3</sub>, TMS, 600 MHz) δ 7.65 (s, 4H), 3.62 (s, 2H), 2.70 (s, 3H), 1.78 (s, 3H), 1.49 - 1.37 (m, 4H). <sup>13</sup>C NMR (CDCl<sub>3</sub>, TMS, 150 MHz) δ 188.8, 136.6, 132.3, 128.9, 127.4, 96.8, 77.7, 54.7, 33.8, 16.7, 7.1. IR (neat) ν 2942, 1658, 1428, 1343, 1253, 1221, 1161, 992, 945, 803, 754, 699 cm<sup>-1</sup>. HRMS (ESI) calcd. for C<sub>14</sub>H<sub>16</sub>NO<sub>2</sub>NaSBr (M+Na): 363.9977, Found: 363.9977.

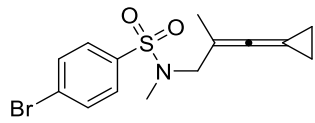

$^1\text{H}$  NMR ( $\text{CDCl}_3$ , 600 MHz, TMS)

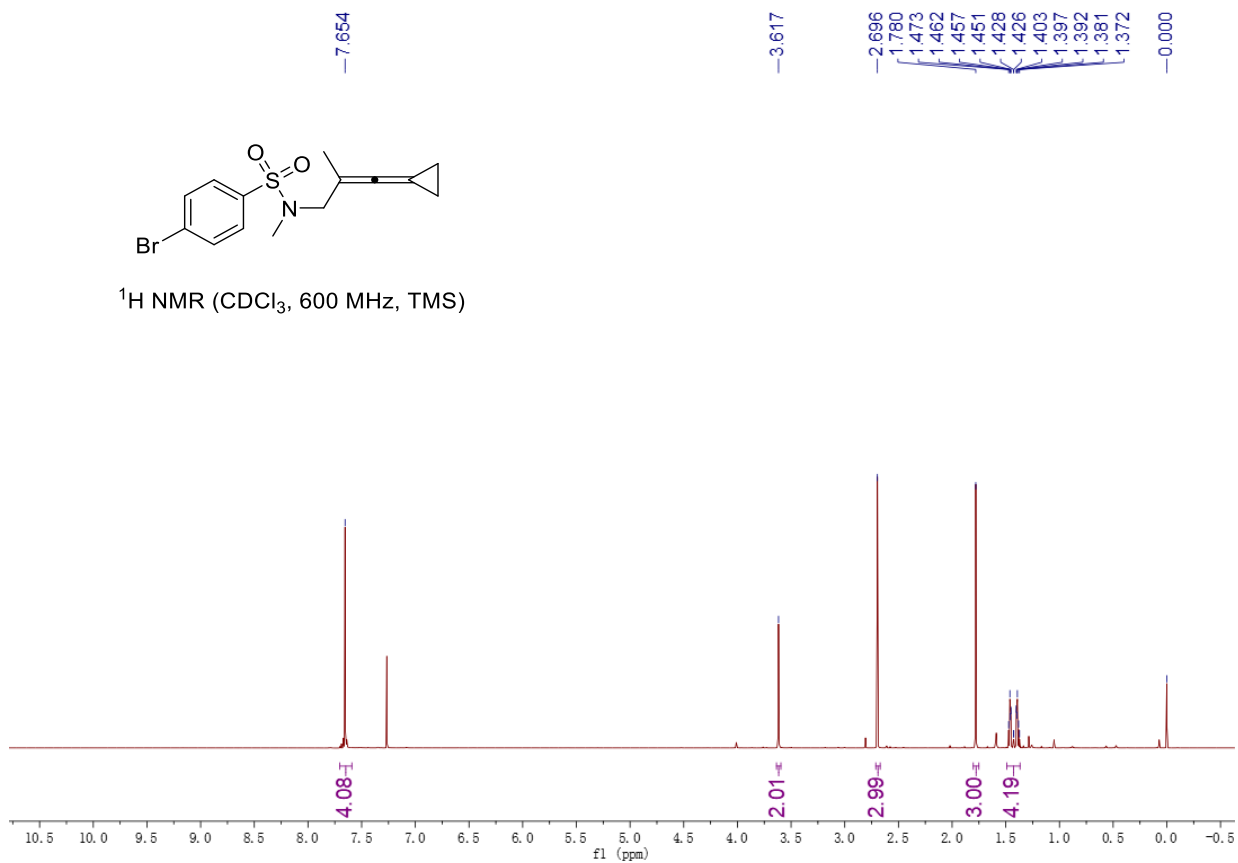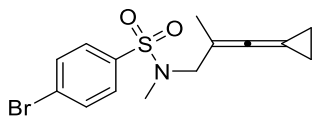

$^{13}\text{C}$  NMR ( $\text{CDCl}_3$ , 150 MHz, TMS)

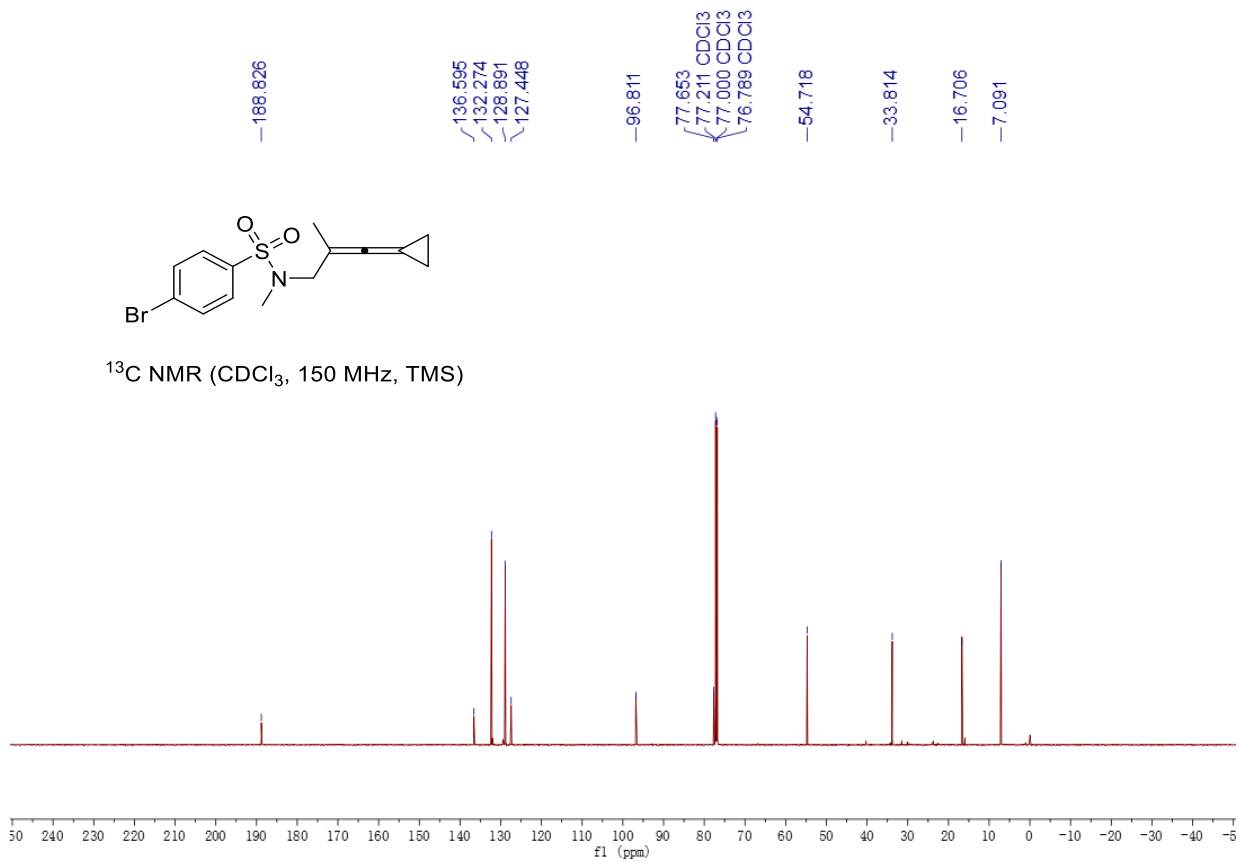



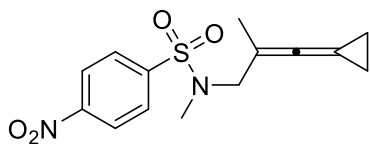

***N*-(3-cyclopropylidene-2-methyl-3 $\lambda^5$ -allyl)-*N*-methyl-4-nitrobenzenesulfonamide (1ac)**

A yellow oil, 40% yield, 123.4 mg.  $^1\text{H}$  NMR ( $\text{CDCl}_3$ , TMS, 400 MHz)  $\delta$  8.37 (d,  $J = 8.9$  Hz, 2H), 7.98 (d,  $J = 8.8$  Hz, 2H), 3.69 (s, 2H), 2.76 (s, 3H), 1.78 (s, 3H), 1.49 - 1.37 (m, 4H).  $^{13}\text{C}$  NMR ( $\text{CDCl}_3$ , TMS, 100 MHz)  $\delta$  188.8, 150.0, 143.7, 128.5, 124.3, 96.4, 77.9, 54.7, 33.9, 16.7, 7.2. IR (neat)  $\nu$  2966, 1674, 1480, 1448, 1396, 1219, 991, 756, 738, 722, 697  $\text{cm}^{-1}$ . HRMS (ESI) calcd. for  $\text{C}_{14}\text{H}_{17}\text{N}_2\text{O}_4\text{S}$  (M+H): 309.0905, Found: 309.0904.

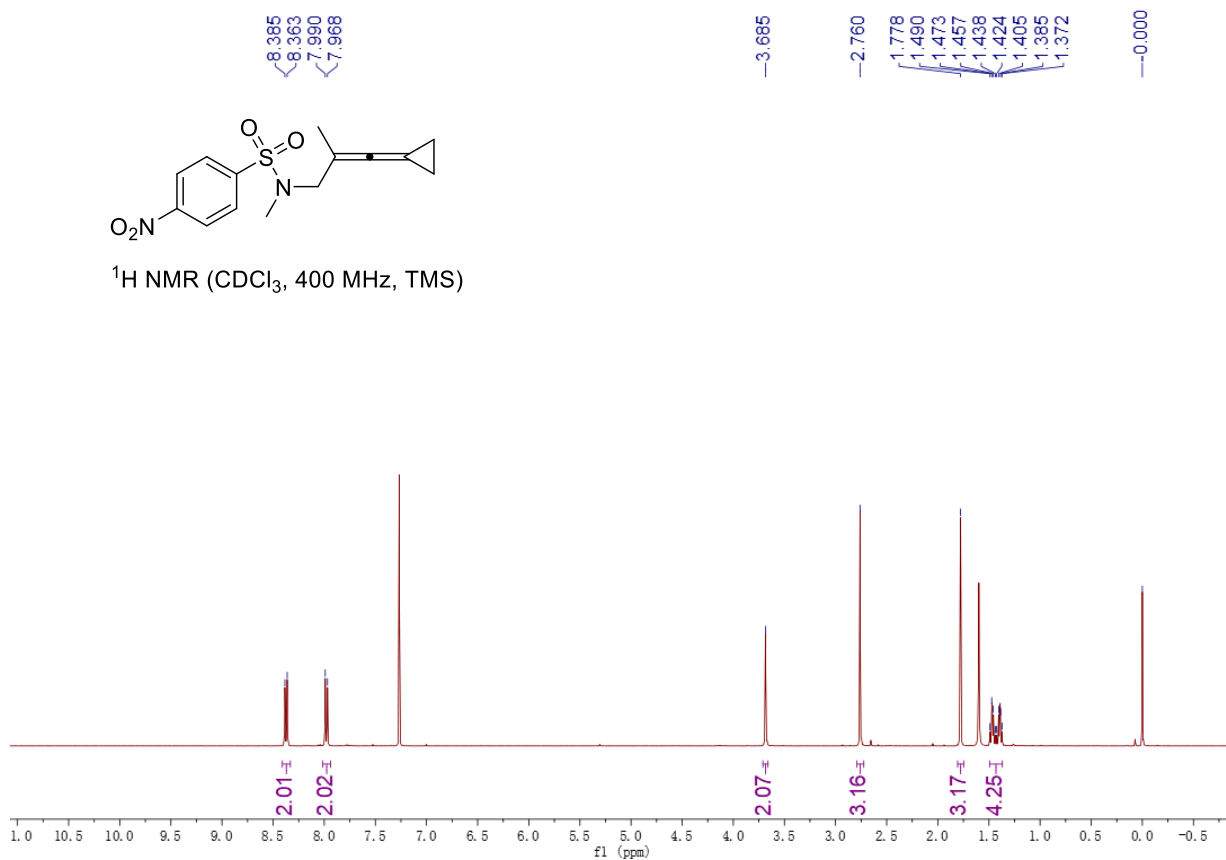

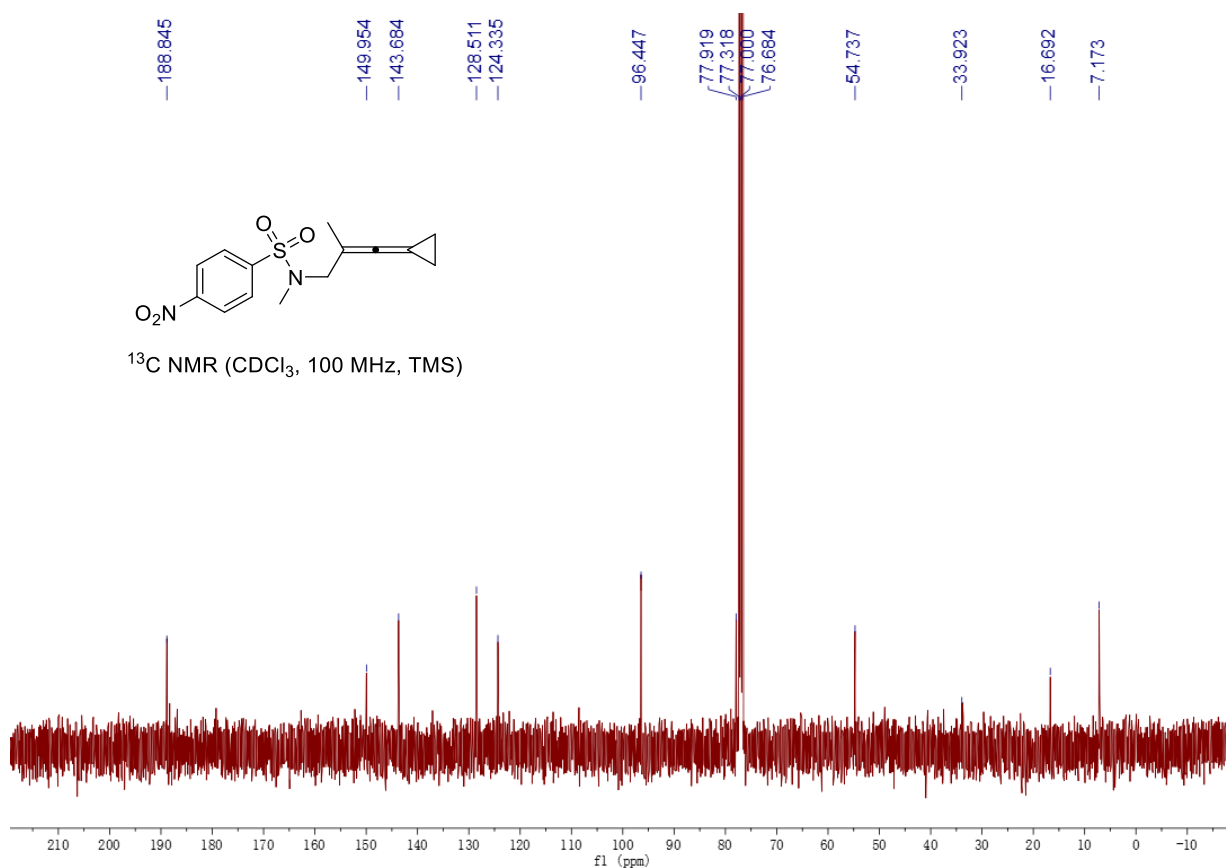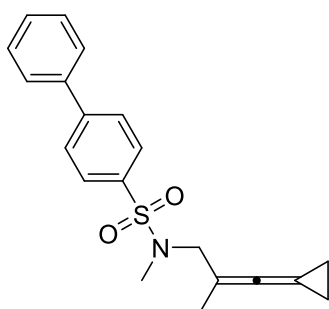

***N*-(3-cyclopropylidene-2-methyl-3 $\lambda^5$ -allyl)-*N*-methyl-[1,1'-biphenyl]-4-sulfonamide (1ad)**

A colorless oil, 44% yield, 149.4 mg.  $^1\text{H}$  NMR (CDCl<sub>3</sub>, TMS, 400 MHz)  $\delta$  7.85 (d,  $J$  = 8.5 Hz, 2H), 7.72 (d,  $J$  = 8.4 Hz, 2H), 7.62 - 7.58 (m, 2H), 7.51 - 7.39 (m, 3H), 3.67 (s, 2H), 2.74 (s, 3H), 1.81 (s, 3H), 1.48 - 1.36 (m, 4H).  $^{13}\text{C}$  NMR (CDCl<sub>3</sub>, TMS, 100 MHz)  $\delta$  188.8, 145.4, 139.3, 136.0, 129.0, 128.4, 127.9, 127.6, 127.3, 97.1, 77.5, 54.8, 33.9, 16.7, 7.1. IR (neat)  $\nu$  2932, 1712, 1588, 1461, 1418, 1396, 1034, 991, 891, 747, 697 cm<sup>-1</sup>. HRMS (ESI) calcd. for C<sub>20</sub>H<sub>22</sub>NO<sub>2</sub>S (M+H): 340.1365, Found: 340.1366.

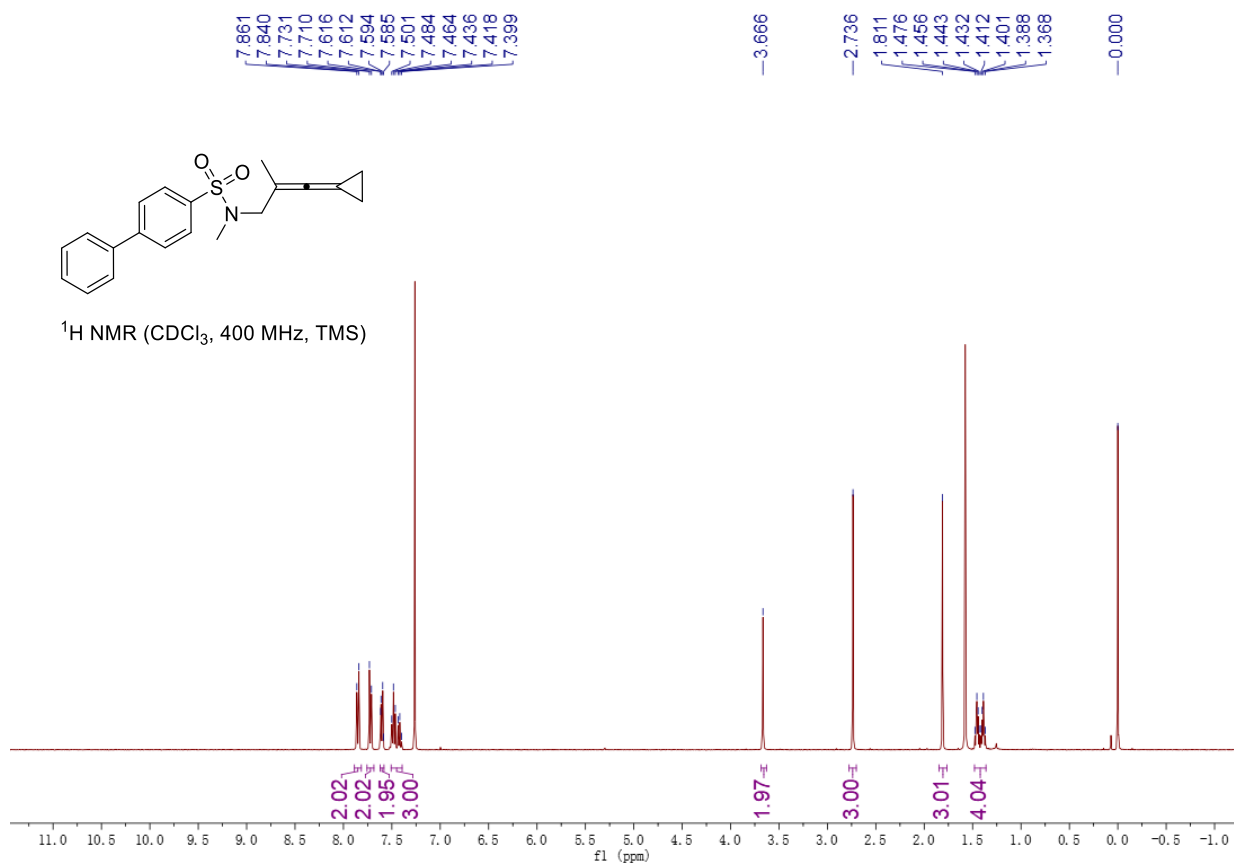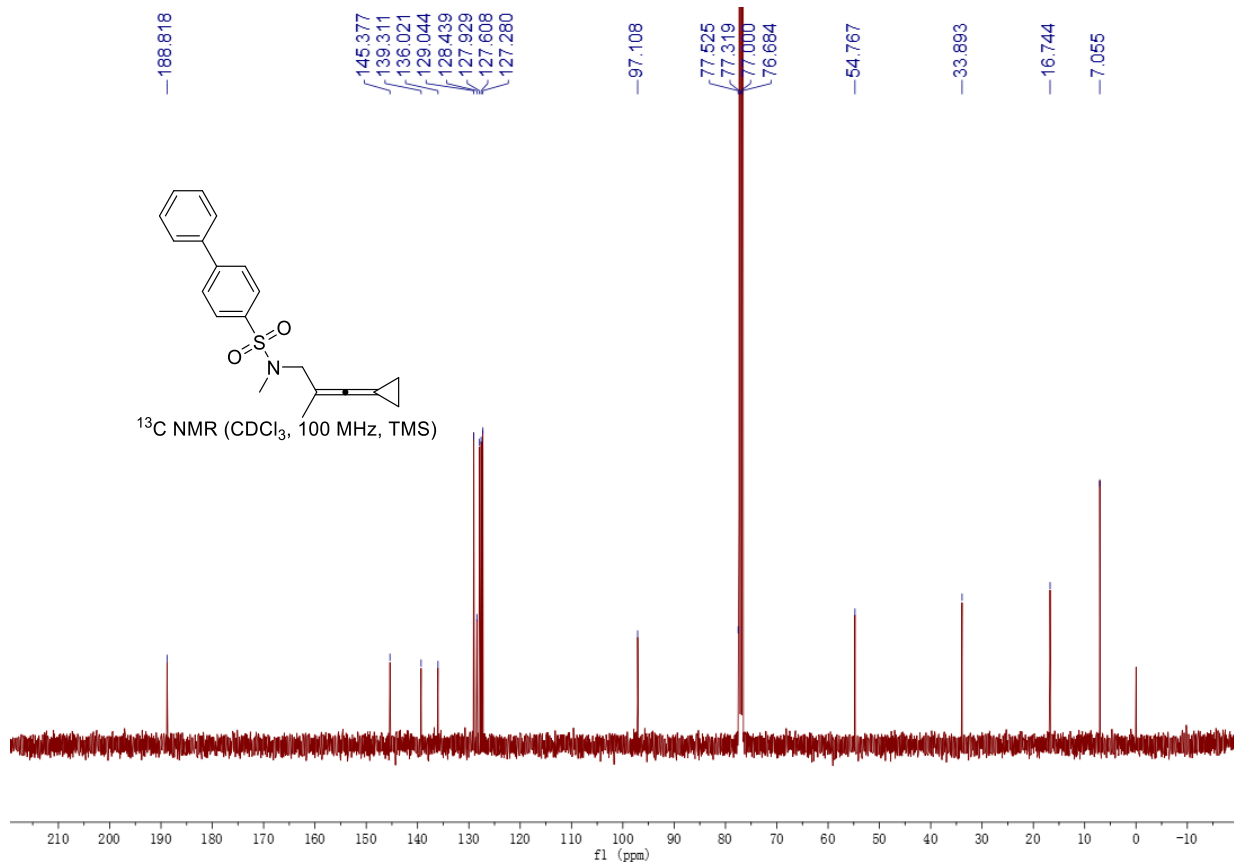

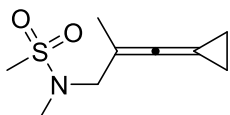

***N*-(3-cyclopropylidene-2-methyl-3-allyl)-*N*-methylmethanesulfonamide (1ae)**

A colorless oil, 52% yield, 104.7 mg.  $^1\text{H}$  NMR ( $\text{CDCl}_3$ , TMS, 400 MHz)  $\delta$  3.77 (s, 2H), 2.85 (s, 3H), 2.81 (s, 3H), 1.78 (s, 3H), 1.54 - 1.44 (m, 4H).  $^{13}\text{C}$  NMR ( $\text{CDCl}_3$ , TMS, 150 MHz)  $\delta$  188.3, 97.5, 78.2, 77.2, 77.0, 76.8, 54.1, 36.2, 34.0, 16.9, 7.0. IR (neat)  $\nu$  2917, 1634, 1493, 1456, 1397, 1301, 1221, 1034, 991, 746, 697  $\text{cm}^{-1}$ . HRMS (ESI) calcd. for  $\text{C}_9\text{H}_{15}\text{NO}_2\text{NaS}$  ( $\text{M}+\text{Na}$ ): 224.0721, Found: 224.0732.

3.773  
2.847  
2.809  
1.782  
1.528  
1.510  
1.496  
1.478  
1.464  
1.446  
0.000

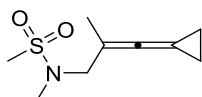

$^1\text{H}$  NMR ( $\text{CDCl}_3$ , 400 MHz, TMS)

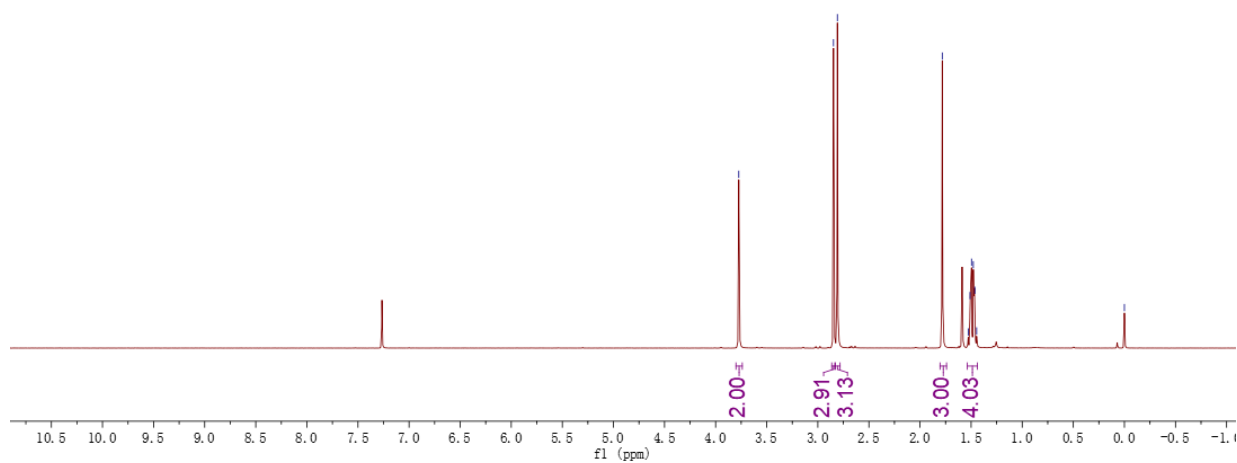

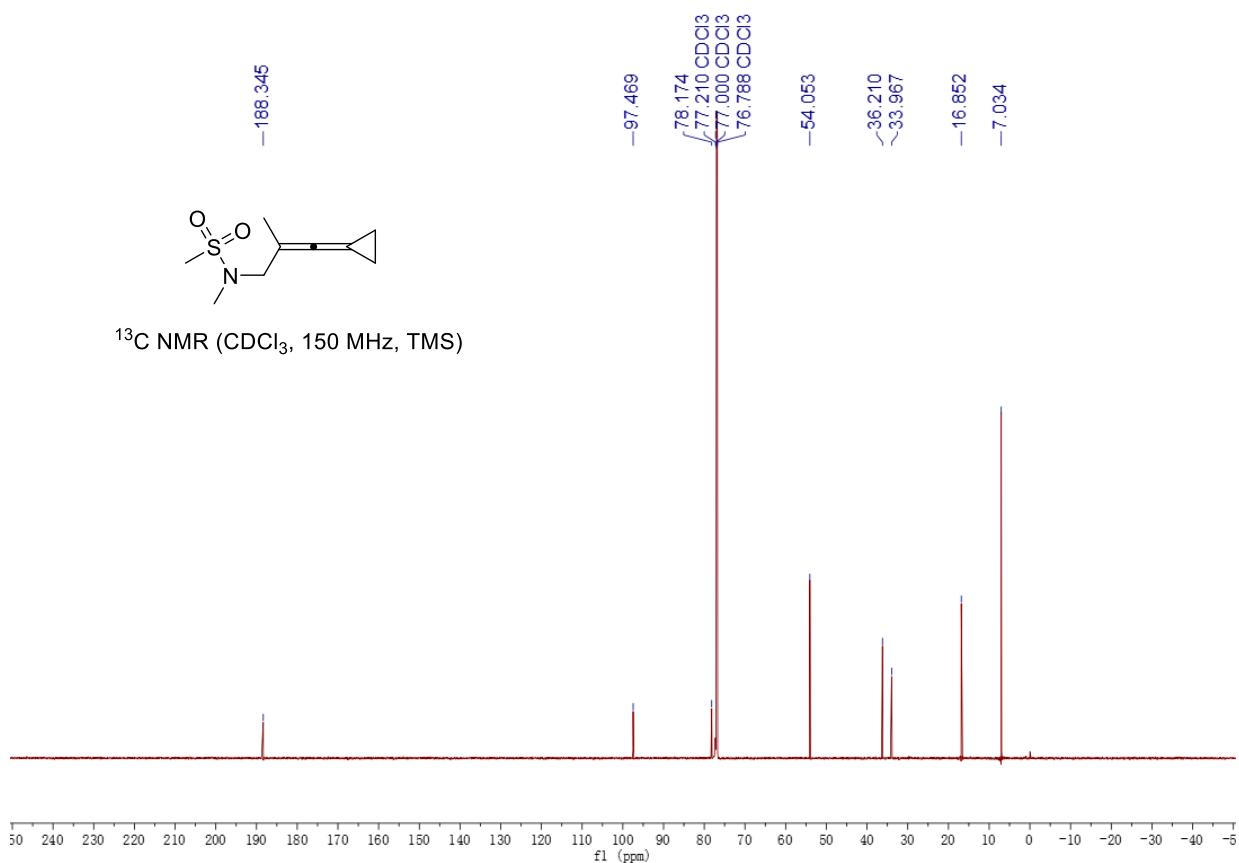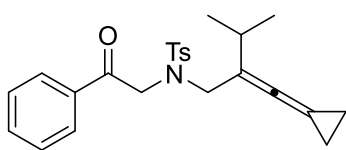

***N*-(2-(cyclopropylidene-15-methylene)-3-methylbutyl)-4-methyl-*N*-(2-oxo-2-phenylethyl)benzenesulfonamide (1z)**

A light yellow oil, this is a known compound and its spectroscopic data are consistent with those reported in the previous literature,<sup>[10]</sup> 33% yield, 135.1 mg. <sup>1</sup>H NMR (CDCl<sub>3</sub>, TMS, 400 MHz) δ 0.95 (d, *J* = 6.8 Hz, 6H), 1.13-1.16 (m, 2H), 1.28-1.31 (m, 2H), 2.19-2.26 (m, 1H), 2.43 (s, 3H), 4.00 (s, 2H), 4.73 (s, 2H), 7.29 (d, *J* = 8.4 Hz, 2H), 7.46 (dd, *J*<sub>1</sub> = 7.6 Hz, *J*<sub>2</sub> = 8.0 Hz, 2H), 7.58 (dd, *J*<sub>1</sub> = 7.2 Hz, *J*<sub>2</sub> = 7.6 Hz, 1H), 7.75 (d, *J* = 8.0 Hz, 2H), 7.89 (d, *J* = 7.2 Hz, 2H). <sup>13</sup>C NMR (CDCl<sub>3</sub>, TMS, 100 MHz) δ 7.1, 21.49, 21.54, 28.4, 49.8, 51.8, 79.4, 108.0, 127.5, 127.9, 128.7, 129.4, 133.5, 135.3, 137.0, 143.2, 188.0, 193.9.

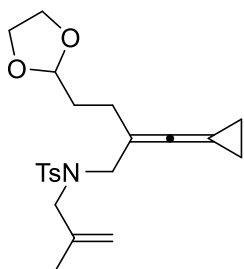

***N*-(2-(cyclopropylidene- $\lambda^5$ -methylene)-4-(1,3-dioxolan-2-yl)butyl)-4-methyl-*N*-(2-methylallyl)benzenesulfonamide (1af)**

A yellow oil, this is a known compound and its spectroscopic data are consistent with those reported in the previous literature,<sup>[11]</sup> 35% yield, 141.2 mg. <sup>1</sup>H NMR (CDCl<sub>3</sub>, TMS, 400 MHz)  $\delta$  1.32- 1.36 (m, 2H), 1.38-1.42 (m, 2H), 1.63 (s, 3H), 1.66-1.71 (m, 2H), 2.00 (t,  $J = 8.0$  Hz, 3H), 2.41 (s, 3H), 3.75 (s, 2H), 3.82-3.84 (m, 4H), 3.92-3.96 (m, 2H), 4.81(t,  $J = 4.8$  Hz, 1H), 4.84-4.86 (m, 2H), 7.27 (d,  $J = 8.0$  Hz, 2H), 7.70 (d,  $J = 8.0$  Hz, 2H). <sup>13</sup>C NMR (CDCl<sub>3</sub>, TMS, 100 MHz)  $\delta$  6.8, 19.9, 21.4, 23.9, 24.6, 31.8, 33.7, 50.1, 52.9, 64.7, 79.8, 101.8, 103.9, 104.4, 114.3, 127.1, 129.3, 137.5, 140.0, 142.8, 187.9

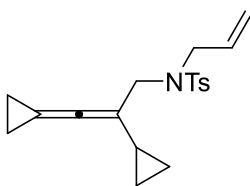

***N*-allyl-*N*-(2-cyclopropyl-3-cyclopropylidene-3-allyl)-4-methylbenzenesulfonamide (1aj)**

A yellow oil, this is a known compound and its spectroscopic data are consistent with those reported in the previous literature,<sup>[11]</sup> 39% yield, 128.3 mg. <sup>1</sup>H NMR (CDCl<sub>3</sub>, TMS, 400 MHz)  $\delta$  7.71 (d,  $J = 8.3$  Hz, 2H), 7.28 (d,  $J = 8.0$ Hz, 2H), 5.67 - 5.56 (m, 1H), 5.19 - 4.94 (m, 2H), 3.94 (s, 2H), 3.89 - 3.84 (m, 2H), 2.41 (s, 3H), 1.46 - 1.32 (m, 4H), 1.23 - 1.17 (m, 1H), 0.70 - 0.59 (m, 2H), 0.40 - 0.27 (m, 2H). <sup>13</sup>C NMR (CDCl<sub>3</sub>, TMS, 100 MHz)  $\delta$  185.5, 141.9, 136.8, 131.4, 128.5, 126.2, 118.1, 104.6, 79.4, 48.9, 48.1, 20.5, 9.8, 6.12, 6.07.

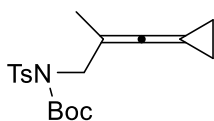

***tert*-butyl (3-cyclopropylidene-2-methyl-3 $\lambda^5$ -allyl)(tosyl)carbamate (1ak)**

A colorless oil, 60% yield, 217.8 mg. <sup>1</sup>H NMR (CDCl<sub>3</sub>, TMS, 400 MHz)  $\delta$  7.82 (d,  $J = 8.3$  Hz, 2H),

7.28 (d,  $J = 7.8$  Hz, 2H), 4.44 (s, 2H), 2.43 (s, 3H), 1.78 (s, 3H), 1.43 - 1.39 (m, 2H), 1.35 (s, 9H), 1.31 - 1.27 (m, 2H).  $^{13}\text{C}$  NMR ( $\text{CDCl}_3$ , TMS, 100 MHz)  $\delta$  186.4, 150.9, 143.9, 137.4, 129.1, 128.3, 99.7, 83.8, 80.6, 49.5, 27.9, 21.6, 17.2, 6.8. IR (neat)  $\nu$  2919, 1810, 1618, 1329, 1307, 1289, 1103, 981, 867, 709, 698  $\text{cm}^{-1}$ . HRMS (ESI) calcd. for  $\text{C}_{19}\text{H}_{26}\text{O}_4\text{NS}$  ( $\text{M}+\text{H}$ ): 364.1577, Found: 364.1563.

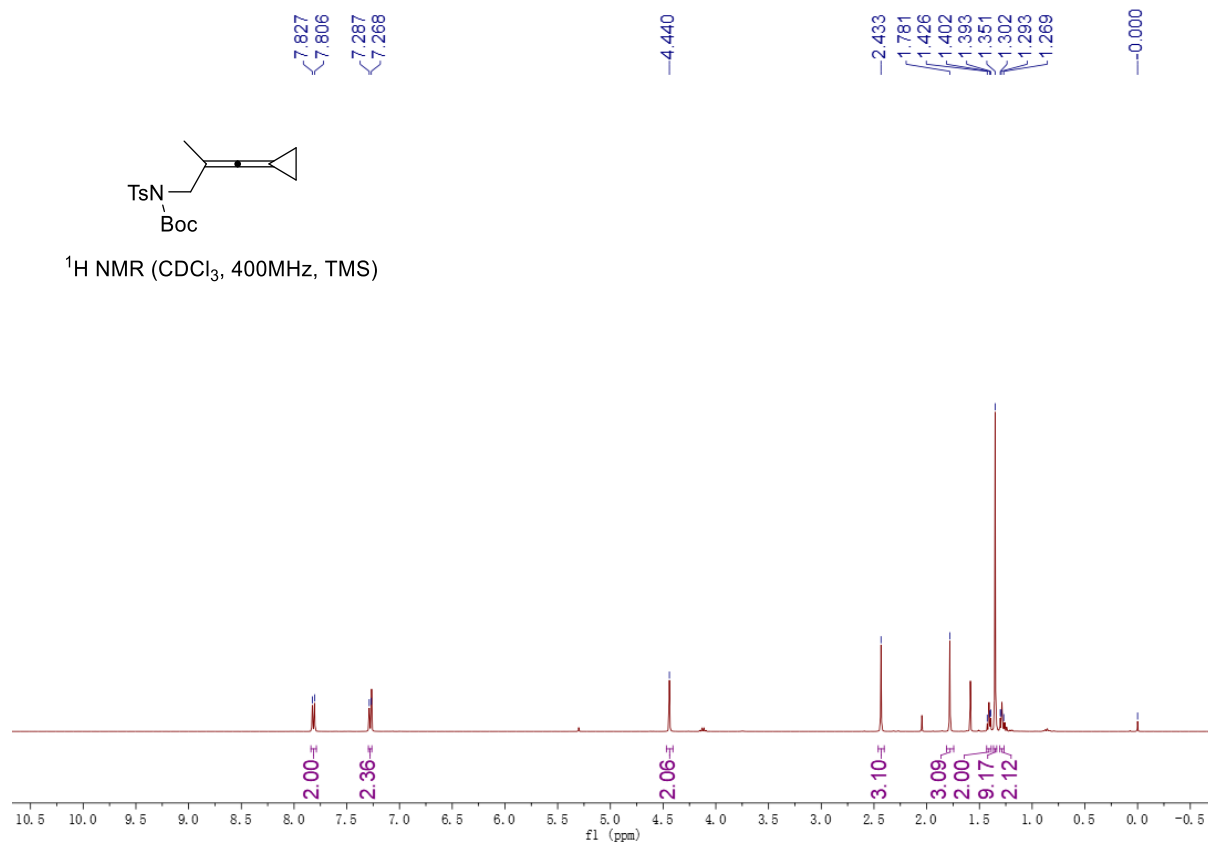

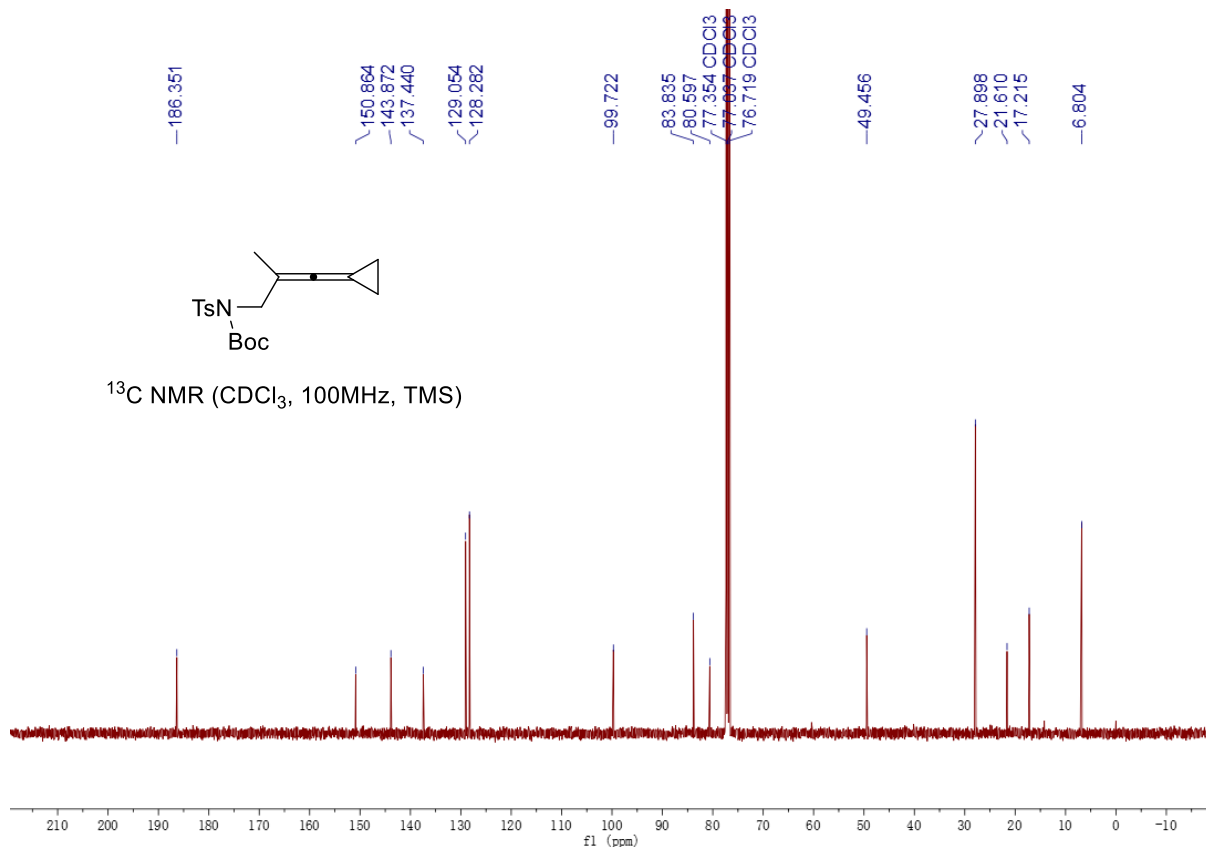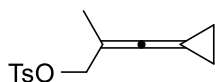

### 3-cyclopropylidene-2-methyl-3λ<sup>5</sup>-allyl 4-methylbenzenesulfonate (**5a**)

A colorless oil, 46% yield, 121.6 mg. <sup>1</sup>H NMR (CDCl<sub>3</sub>, TMS, 600 MHz) δ 7.81 (d, *J* = 8.3 Hz, 2H), 7.32 (d, *J* = 8.1 Hz, 2H), 5.21 (s, 1H), 4.95 (s, 1H), 2.45 (s, 3H), 1.52 - 1.46 (m, 2H), 1.04 - 0.98 (m, 2H). <sup>13</sup>C NMR (CDCl<sub>3</sub>, TMS, 150 MHz) δ 144.7, 139.0, 137.4, 134.4, 129.6, 128.2, 114.6, 113.4, 21.7, 20.2, 6.7, 4.2. IR (neat) ν 2925, 1710, 1508, 1437, 1397, 1358, 1335, 1219, 1025, 991, 888, 739, 697 cm<sup>-1</sup>. HRMS (ESI) calcd. for C<sub>14</sub>H<sub>16</sub>O<sub>3</sub>NaS (M+Na): 287.0735, Found: 287.0718.



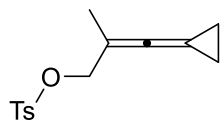

$^1\text{H}$  NMR ( $\text{CDCl}_3$ , 600 MHz, TMS)

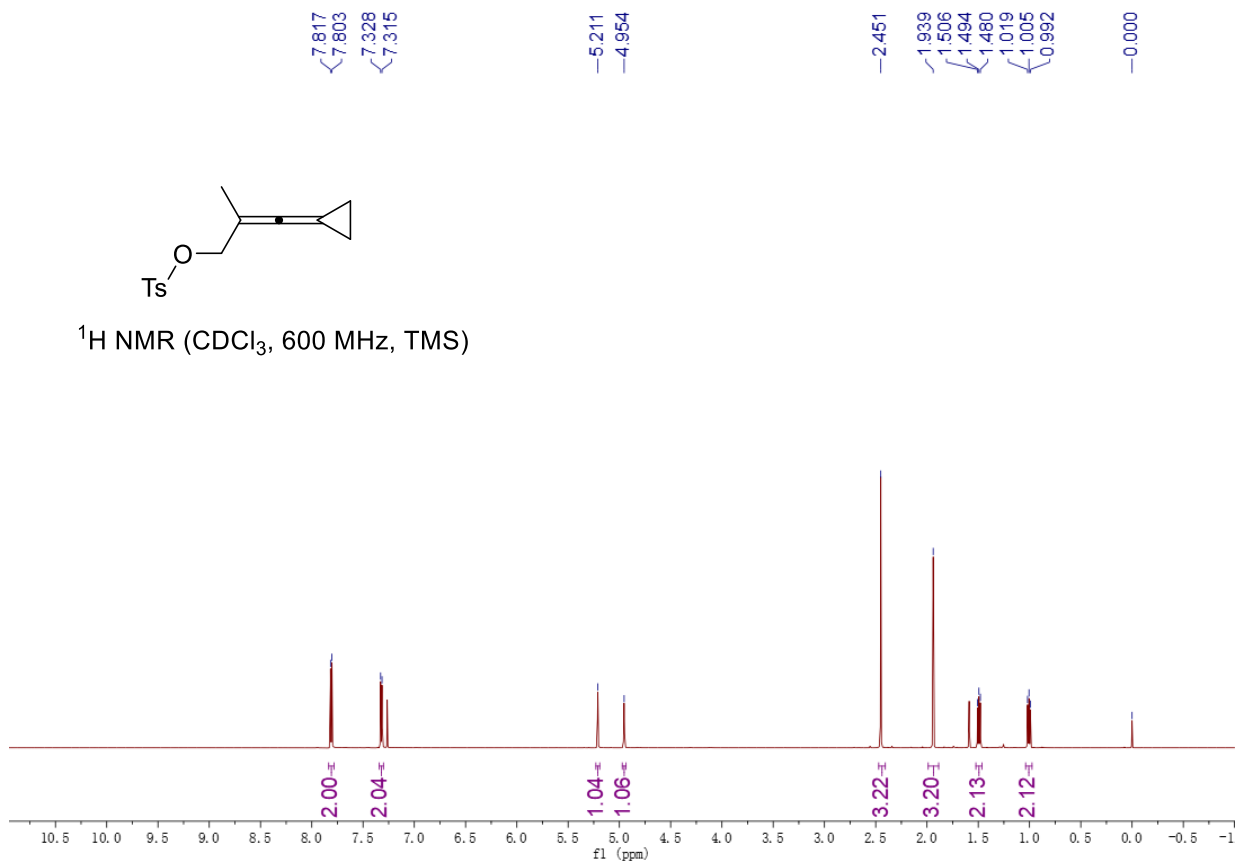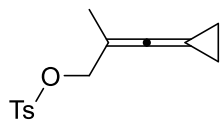

$^{13}\text{C}$  NMR ( $\text{CDCl}_3$ , 150 MHz, TMS)

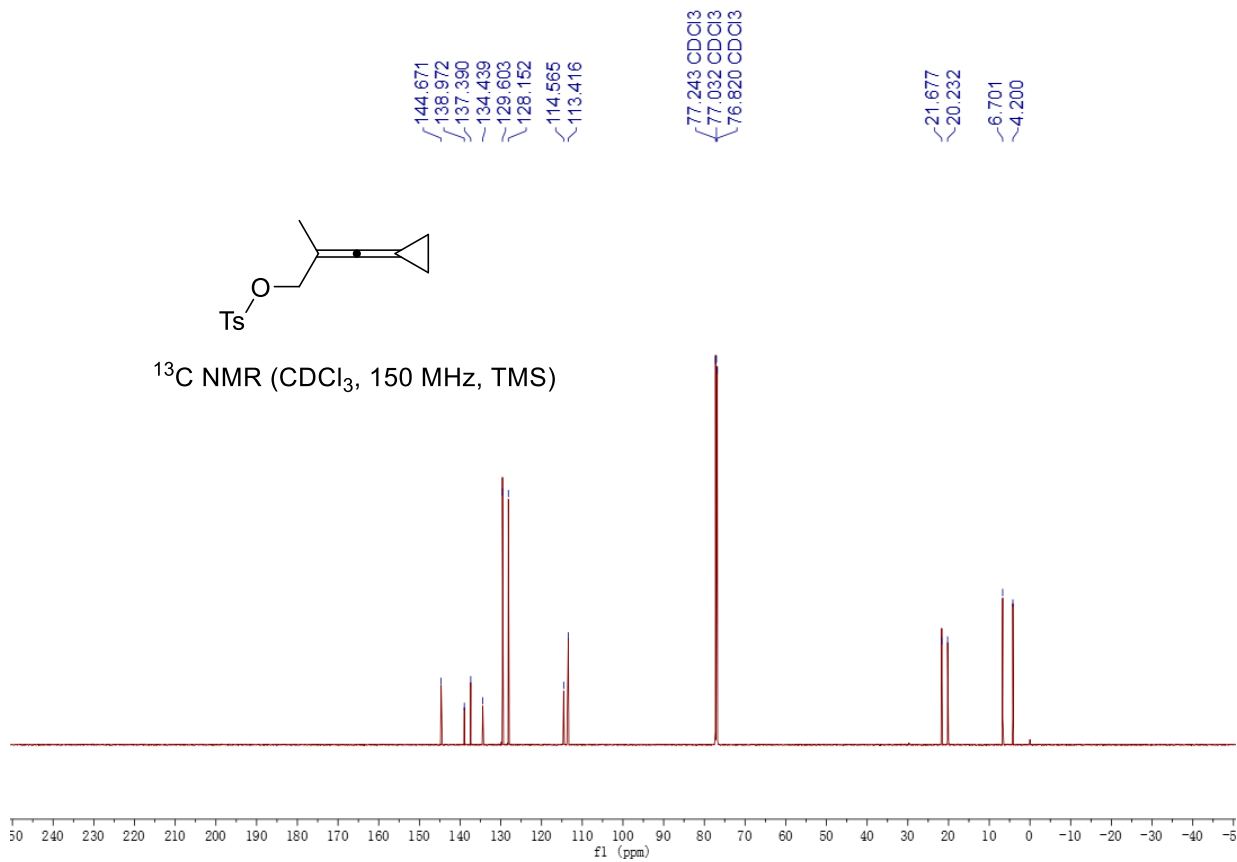

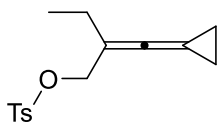

**2-(cyclopropylidene- $\lambda^5$ -methylene)butyl 4-methylbenzenesulfonate (5b)**

A colorless oil, 43% yield, 119.7 mg.  $^1\text{H}$  NMR ( $\text{CDCl}_3$ , TMS, 600 MHz)  $\delta$  7.82 (d,  $J = 8.4$  Hz, 2H), 7.35 (d,  $J = 8.1$  Hz, 2H), 4.85 (s, 1H), 4.84 (s, 2H), 2.71 - 2.69 (m, 2H), 2.46 (s, 3H), 2.18 - 2.14 (m, 2H), 2.10 (q,  $J = 7.5$  Hz, 2H), 0.97 (t,  $J = 7.4$  Hz, 3H).  $^{13}\text{C}$  NMR ( $\text{CDCl}_3$ , TMS, 150 MHz)  $\delta$  145.3, 142.8, 133.5, 132.5, 129.9, 128.0, 111.8, 30.5, 26.2, 21.7, 21.6, 12.7. IR (neat)  $\nu$  2915, 1665, 1466, 1310, 1230, 1025, 991, 737, 698  $\text{cm}^{-1}$ . HRMS (ESI) calcd. for  $\text{C}_{15}\text{H}_{18}\text{O}_3\text{NaS}$  ( $\text{M}+\text{Na}$ ): 301.0887, Found: 301.0874.

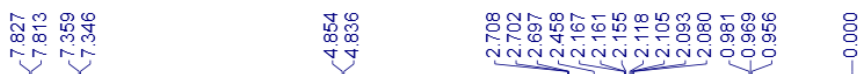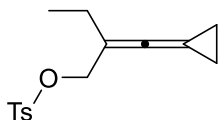

$^1\text{H}$  NMR ( $\text{CDCl}_3$ , 600 MHz, TMS)

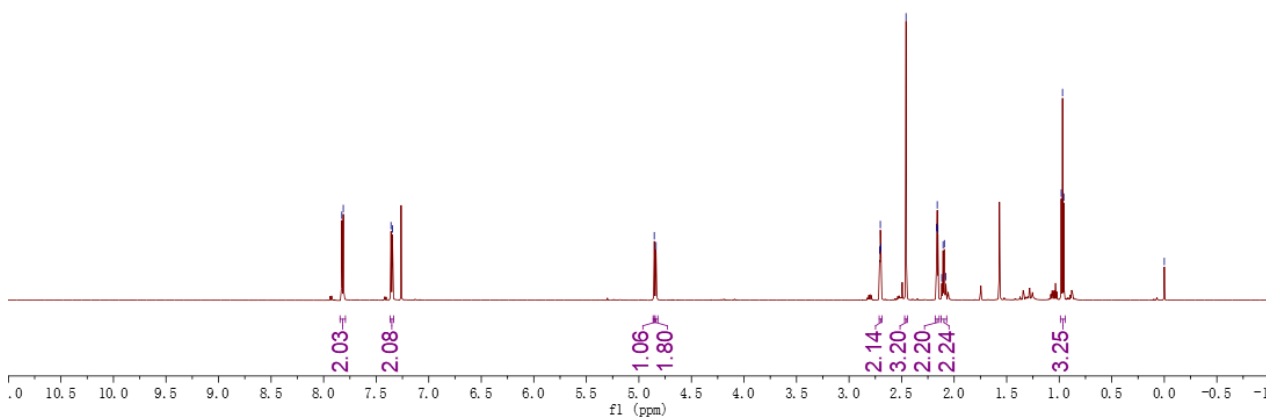

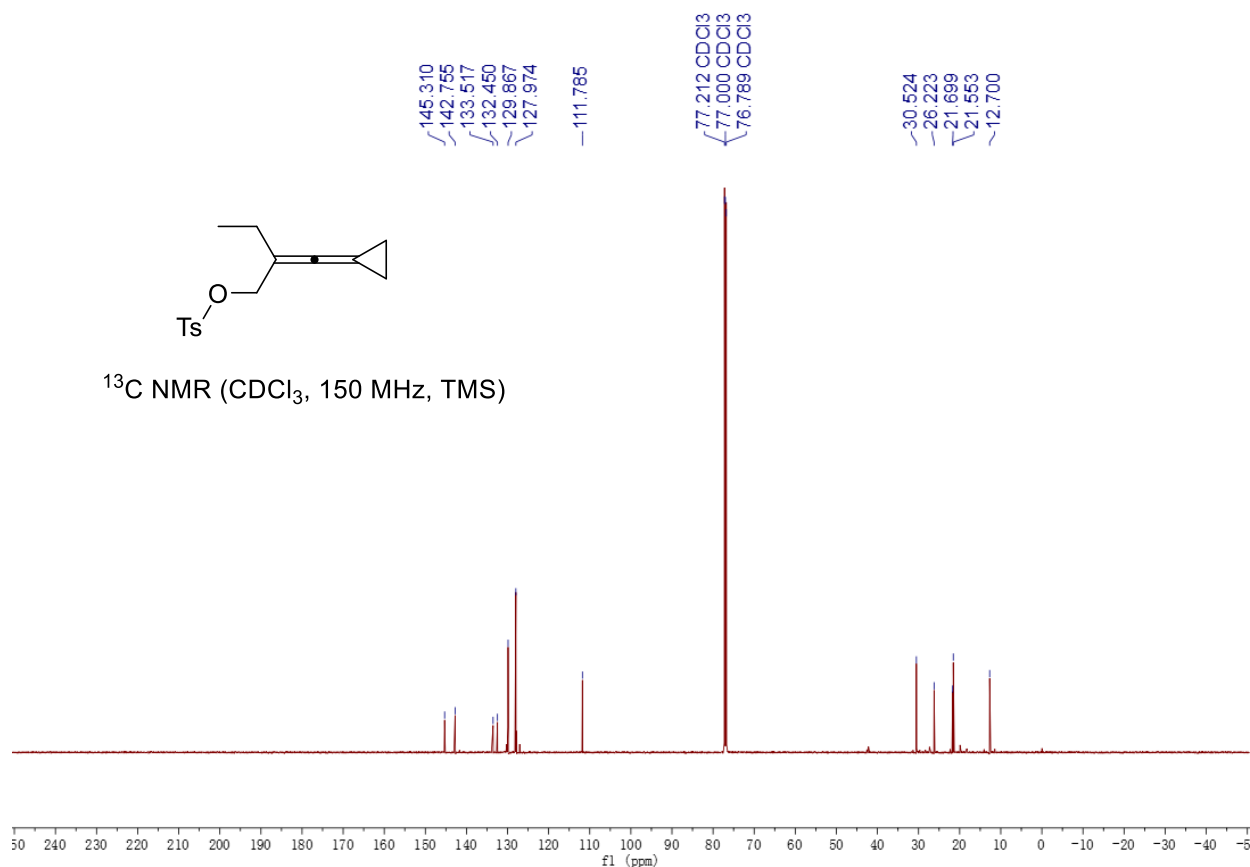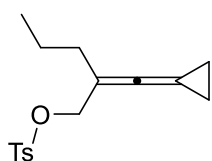

### 2-(cyclopropylidene- $\lambda^5$ -methylene)pentyl 4-methylbenzenesulfonate (5c)

A colorless oil, 45% yield, 131.6 mg. <sup>1</sup>H NMR (CDCl<sub>3</sub>, TMS, 600 MHz)  $\delta$  7.80 (d,  $J$  = 8.4 Hz, 2H), 7.31 (d,  $J$  = 8.0 Hz, 2H), 5.25 (s, 1H), 4.94 (s, 1H), 2.45 (s, 3H), 2.27 - 2.21 (m, 2H), 1.49 - 1.45 (m, 2H), 1.44 - 1.38 (m, 2H), 1.07 - 1.00 (m, 2H), 0.88 (t,  $J$  = 7.4 Hz, 3H). <sup>13</sup>C NMR (CDCl<sub>3</sub>, TMS, 150 MHz)  $\delta$  144.6, 141.5, 138.7, 134.4, 129.5, 128.2, 113.9, 112.9, 35.2, 21.9, 21.6, 13.7, 6.6, 4.2. IR (neat)  $\nu$  3075, 2895, 2859, 1781, 1675, 1566, 1440, 1386, 1325, 1226, 1025, 981, 747, 688 cm<sup>-1</sup>. HRMS (ESI) calcd. for C<sub>16</sub>H<sub>20</sub>O<sub>3</sub>NaS (M+Na): 315.1048, Found: 315.1031.

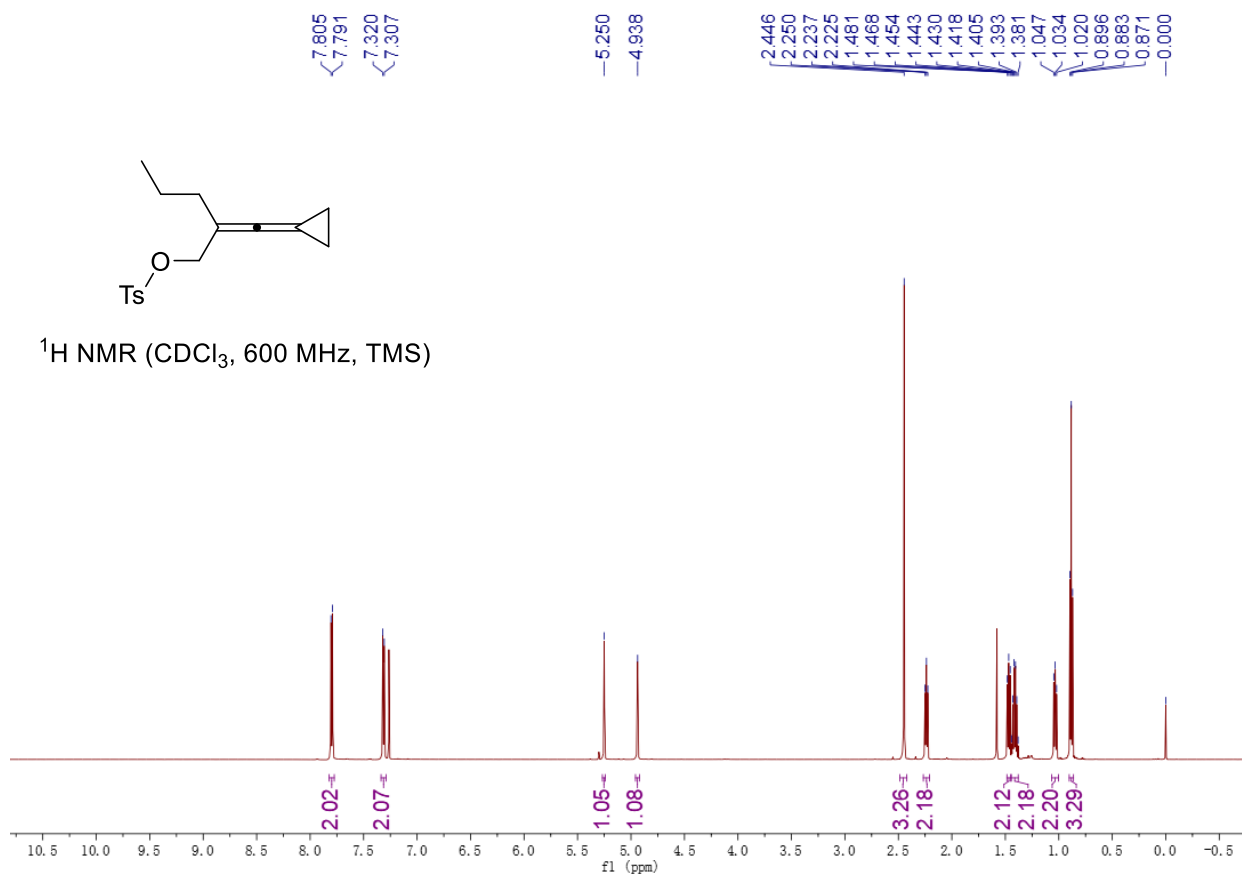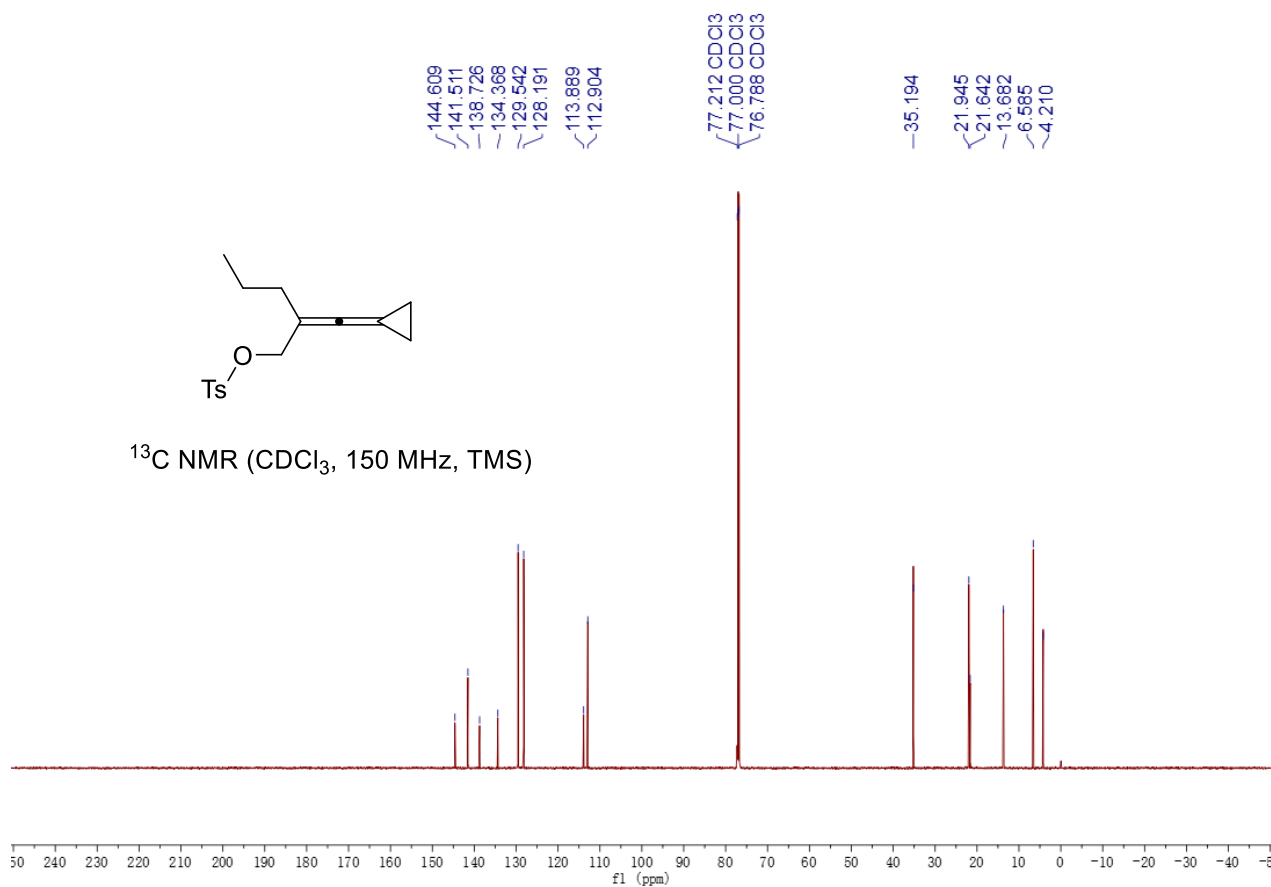

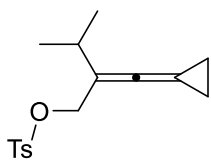

### 2-(cyclopropylidene- $\lambda^5$ -methylene)-3-methylbutyl 4-methylbenzenesulfonate (**5d**)

A colorless oil, 44% yield, 128.7 mg.  $^1\text{H}$  NMR ( $\text{CDCl}_3$ , TMS, 400 MHz)  $\delta$  7.79 (d,  $J = 8.1$  Hz, 2H), 7.31 (d,  $J = 8.0$  Hz, 2H), 5.27 (s, 1H), 4.97 (s, 1H), 2.77 - 2.66 (m, 1H), 2.44 (s, 3H), 1.51 - 1.43 (m, 2H), 1.09 - 1.05 (m, 2H), 1.02 (d,  $J = 6.8$  Hz, 6H).  $^{13}\text{C}$  NMR ( $\text{CDCl}_3$ , TMS, 100 MHz)  $\delta$  148.1, 144.6, 138.8, 134.4, 129.5, 128.2, 113.4, 110.1, 29.1, 22.2, 21.6, 6.7, 4.2. IR (neat)  $\nu$  2959, 1663, 1596, 1437, 1314, 1219, 1035, 990, 783, 736, 696  $\text{cm}^{-1}$ . HRMS (ESI) calcd. for  $\text{C}_{16}\text{H}_{20}\text{O}_3\text{NaS}$  ( $\text{M}+\text{Na}$ ): 315.1058, Found: 315.1031.

7.804  
7.784  
7.316  
7.296

5.271  
4.968

2.759  
2.742  
2.725  
2.709  
2.691  
2.442  
1.491  
1.473  
1.466  
1.451  
1.082  
1.067  
1.061  
1.042  
1.030  
1.013  
-0.001

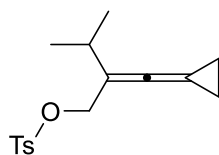

$^1\text{H}$  NMR ( $\text{CDCl}_3$ , 400 MHz, TMS)

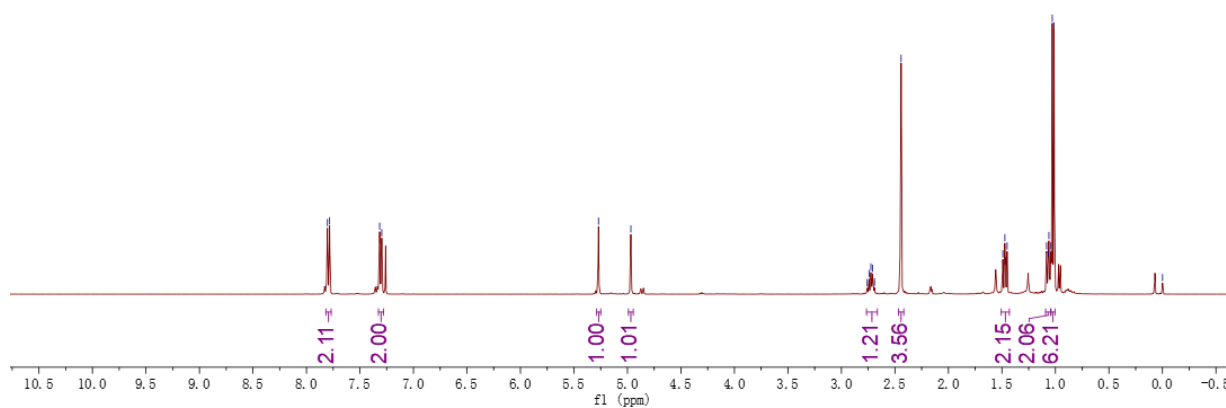

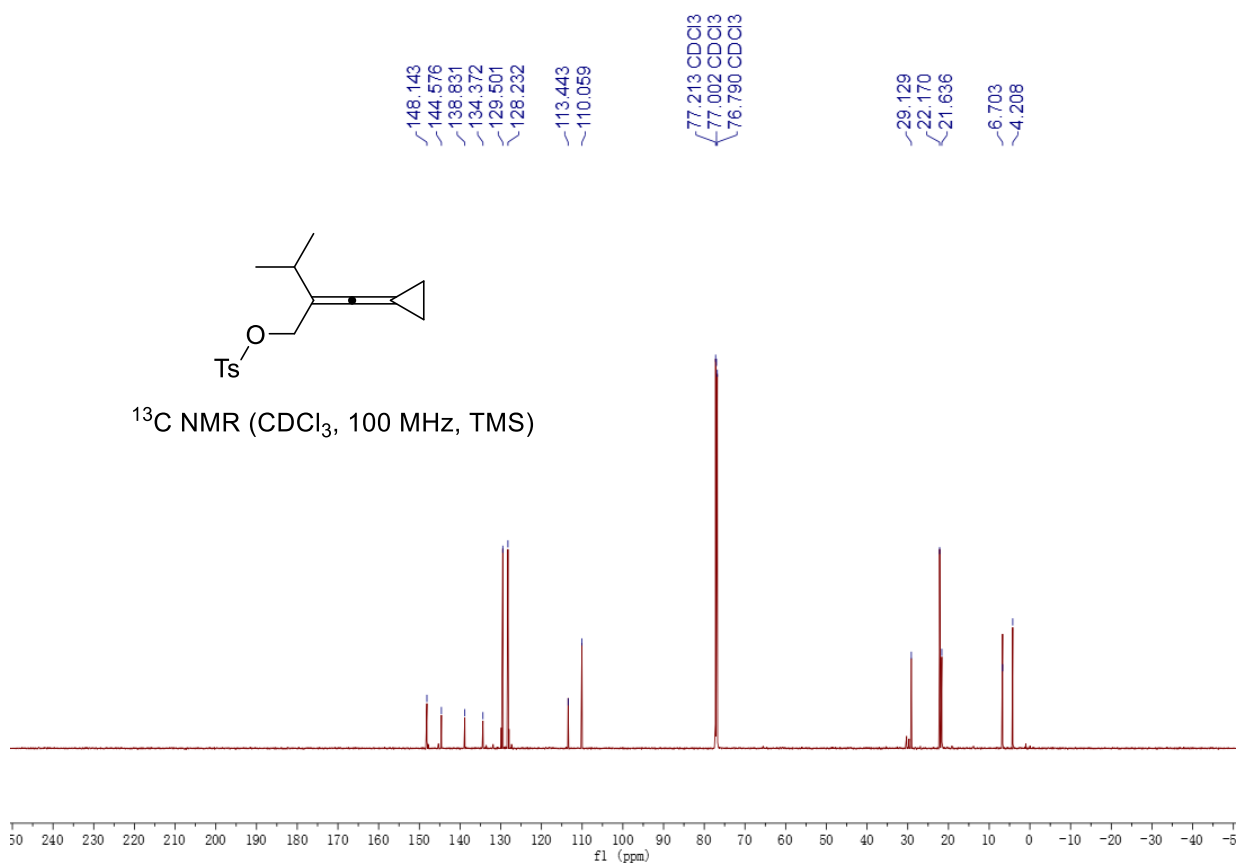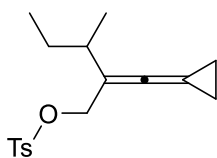

**2-(cyclopropylidene- $\lambda^5$ -methylene)-3-methylpentyl 4-methylbenzenesulfonate (5e)**

A colorless oil, 43% yield, 131.7 mg. <sup>1</sup>H NMR (CDCl<sub>3</sub>, TMS, 600 MHz)  $\delta$  7.80 (d,  $J$  = 8.3 Hz, 2H), 7.31 (d,  $J$  = 8.0 Hz, 2H), 5.31 (s, 1H), 4.94 (s, 1H), 2.57 - 2.51 (m, 1H), 2.45 (s, 3H), 1.53 - 1.45 (m, 3H), 1.31 - 1.23 (m, 1H), 1.09 - 1.02 (m, 2H), 1.00 (d,  $J$  = 6.9 Hz, 3H), 0.83 (t,  $J$  = 7.4 Hz, 3H). <sup>13</sup>C NMR (CDCl<sub>3</sub>, TMS, 150 MHz)  $\delta$  146.9, 144.6, 139.1, 134.3, 129.5, 128.2, 113.4, 110.8, 35.7, 29.0, 21.6, 19.5, 11.6, 6.8, 4.1. IR (neat)  $\nu$  2914, 1594, 1496, 1448, 1396, 1333, 1318, 1036, 992, 740, 709 cm<sup>-1</sup>. HRMS (ESI) calcd. for C<sub>17</sub>H<sub>22</sub>O<sub>3</sub>NaS (M+Na): 329.1187, Found: 329.1195.

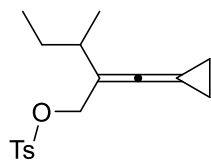

$^1\text{H}$  NMR ( $\text{CDCl}_3$ , 600 MHz, TMS)

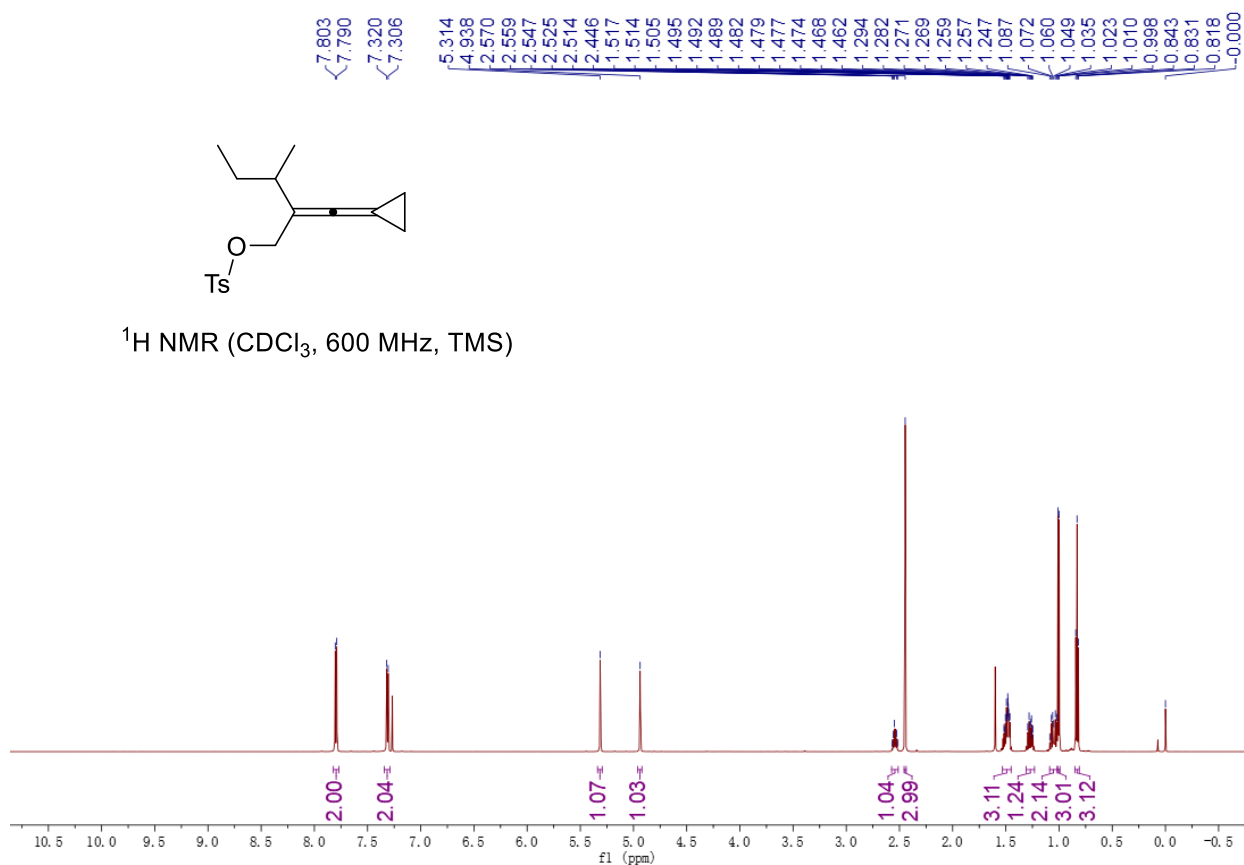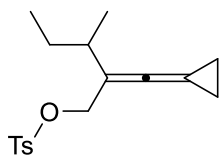

$^{13}\text{C}$  NMR ( $\text{CDCl}_3$ , 150 MHz, TMS)

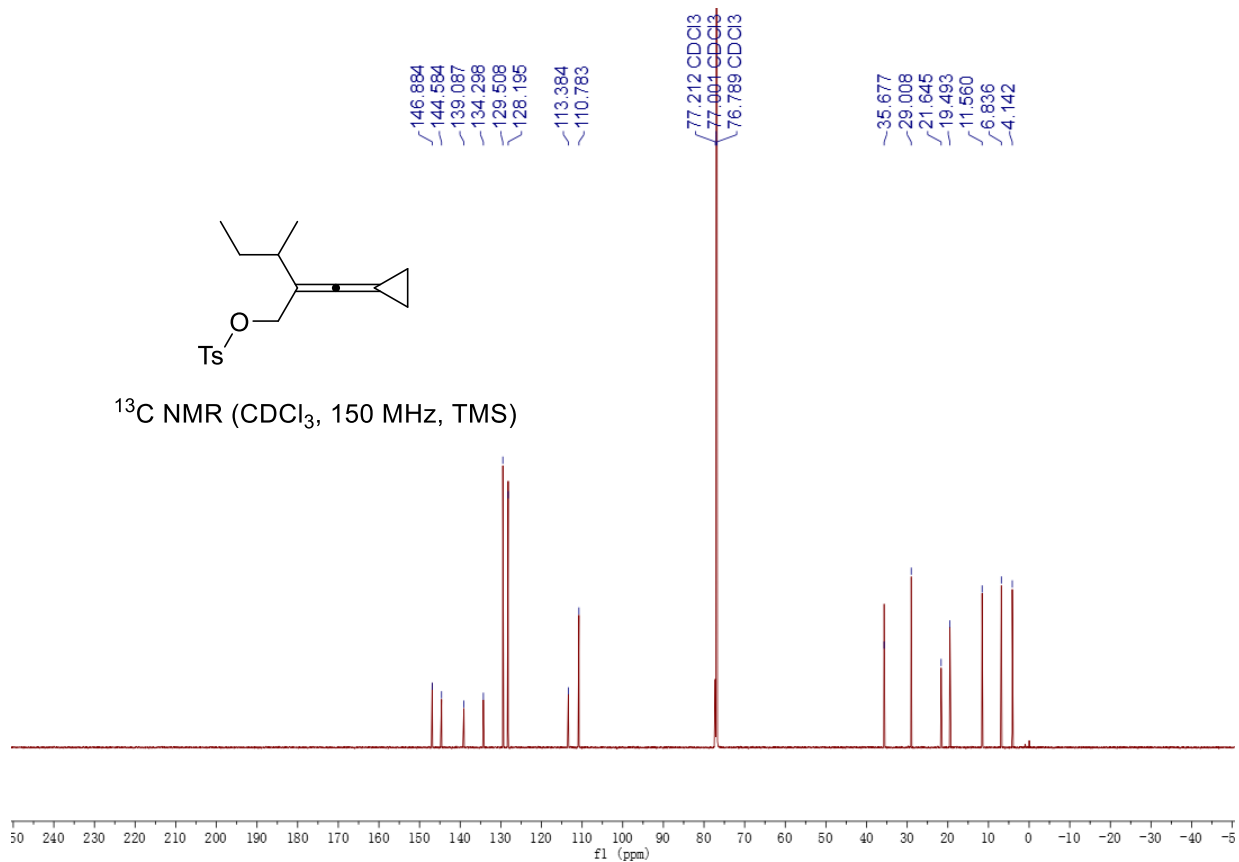

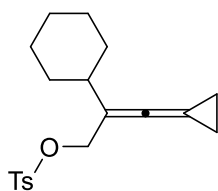

### 2-cyclohexyl-3-cyclopropylidene-3 $\lambda^5$ -allyl 4-methylbenzenesulfonate (5f)

A colorless oil, 45%, 149.6 mg.  $^1\text{H}$  NMR ( $\text{CDCl}_3$ , TMS, 600 MHz)  $\delta$  7.79 (d,  $J = 8.3$  Hz, 2H), 7.31 (d,  $J = 8.0$  Hz, 2H), 5.25 (s, 1H), 4.92 (s, 1H), 2.45 (s, 3H), 2.36 - 2.30 (m, 1H), 1.78 - 1.72 (m, 4H), 1.71 - 1.67 (m, 1H), 1.49 - 1.45 (m, 2H), 1.31 - 1.22 (m, 3H), 1.19 - 1.11 (m, 2H), 1.07 - 1.03 (m, 2H).  $^{13}\text{C}$  NMR ( $\text{CDCl}_3$ , TMS, 150 MHz)  $\delta$  147.2, 144.6, 138.9, 134.4, 129.5, 128.2, 113.2, 110.4, 39.6, 33.0, 26.8, 26.4, 21.6, 6.6, 4.1. IR (neat)  $\nu$  2845, 1663, 1510, 1439, 1402, 1325, 1220, 1032, 741, 703  $\text{cm}^{-1}$ . HRMS (ESI) calcd. for  $\text{C}_{19}\text{H}_{24}\text{O}_3\text{NaS}$  ( $\text{M}+\text{Na}$ ): 355.1344, Found: 355.1365.

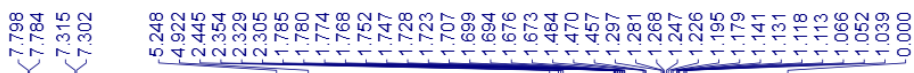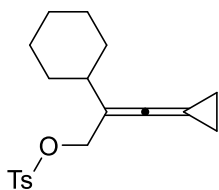

$^1\text{H}$  NMR ( $\text{CDCl}_3$ , 600 MHz, TMS)

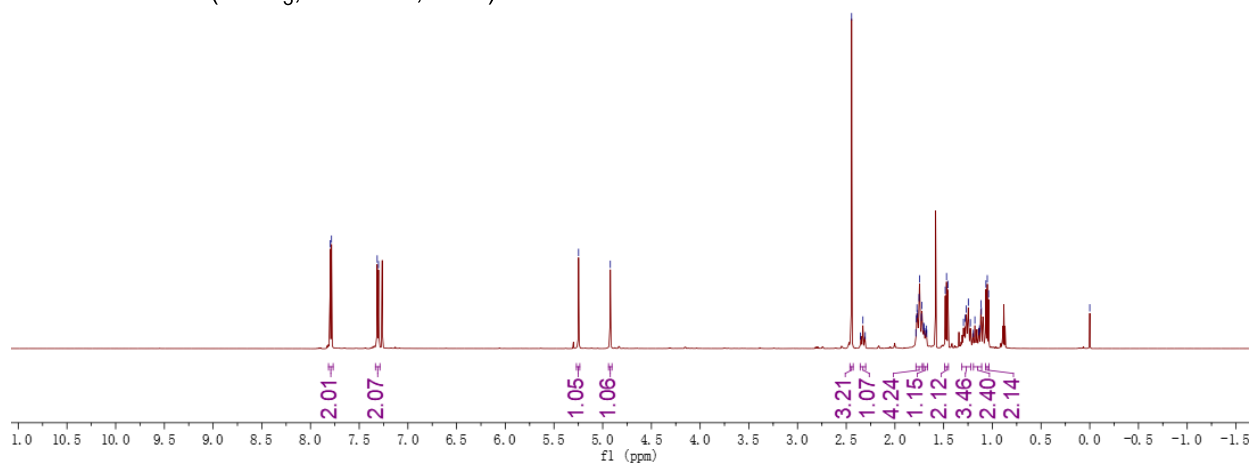



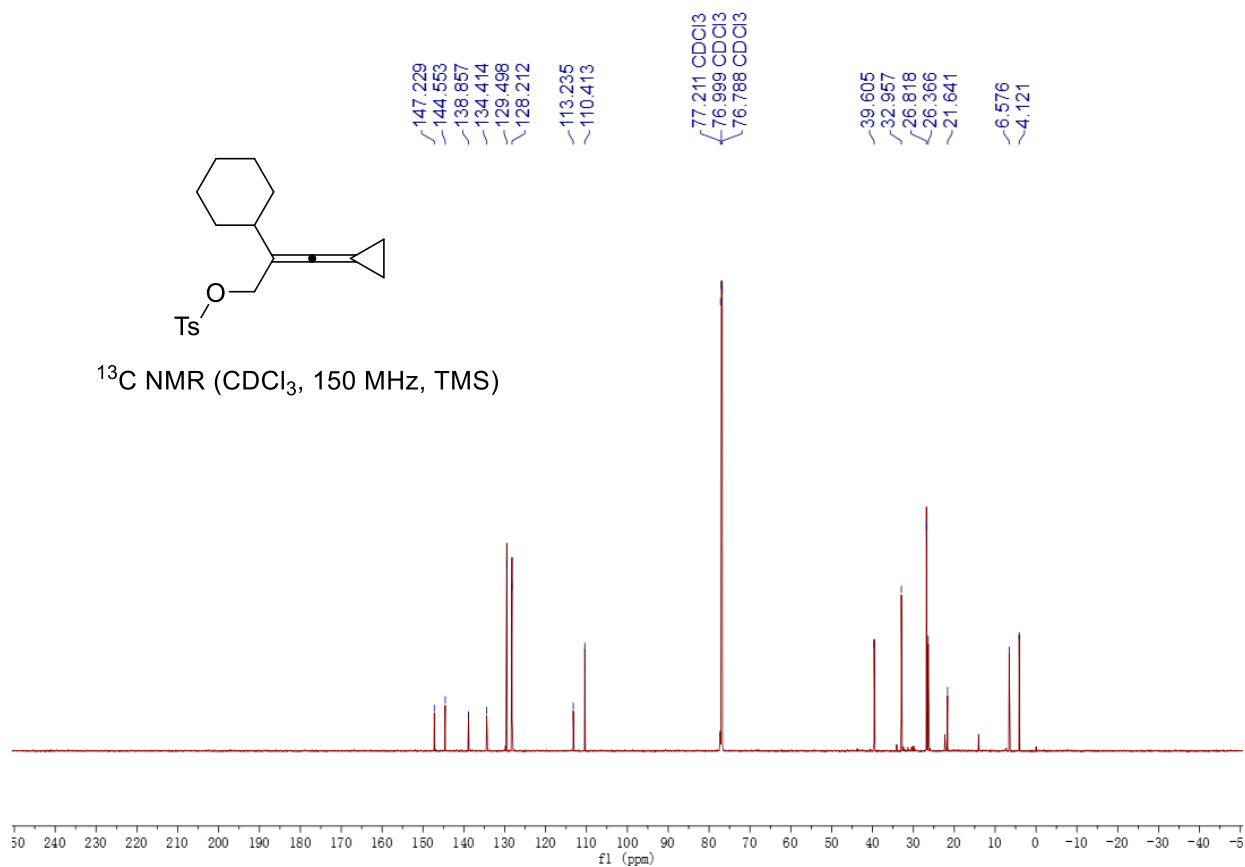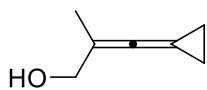

### 3-cyclopropylidene-2-methyl-3λ<sup>5</sup>-prop-2-en-1-ol (5g)

A colorless oil, 40%, 44.0 mg. <sup>1</sup>H NMR (CDCl<sub>3</sub>, TMS, 600 MHz) δ 4.09 (s, 2H), 1.80 (s, 3H), 1.52 - 1.49 (m, 4H), 1.47 - 1.43 (m, 1H). <sup>13</sup>C NMR (CDCl<sub>3</sub>, TMS, 100 MHz) δ 185.1, 134.8, 103.4, 80.3, 64.5, 16.2, 7.0. IR (neat) ν 3016, 2985, 1663, 1510, 1439, 1300, 1087, 701, 695 cm<sup>-1</sup>. HRMS (EI) calcd. for C<sub>7</sub>H<sub>10</sub>O (M): 110.0726, Found: 110.0726.

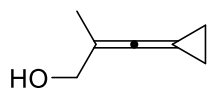

$^1\text{H}$  NMR ( $\text{CDCl}_3$ , 600 MHz, TMS)

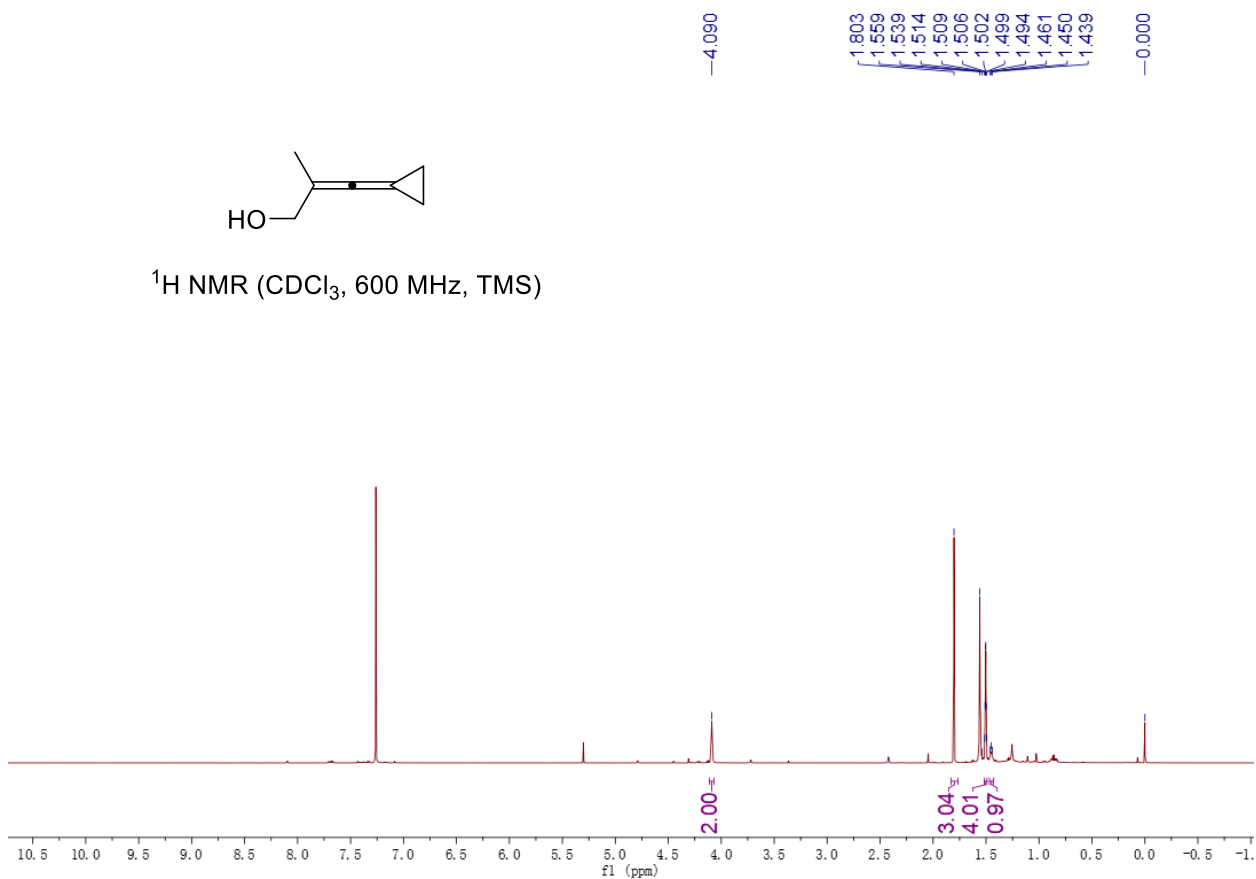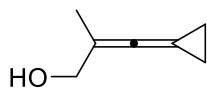

$^{13}\text{C}$  NMR ( $\text{CDCl}_3$ , 100 MHz, TMS)

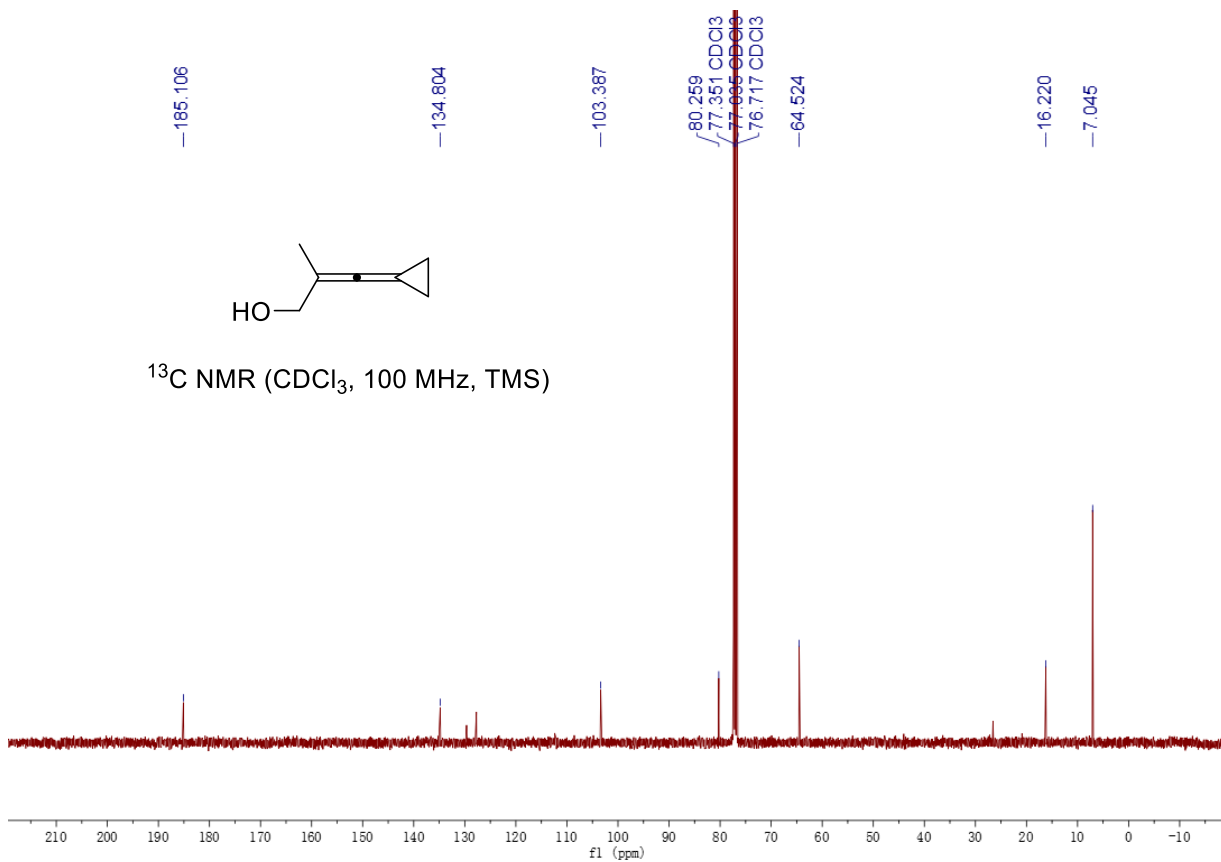

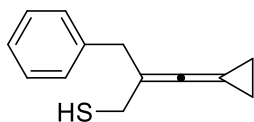

**2-benzyl-3-cyclopropylidene-3 $\lambda^5$ -prop-2-ene-1-thiol (7a)**

A colorless oil, 33%, 66.7 mg.  $^1\text{H}$  NMR ( $\text{CDCl}_3$ , TMS, 600 MHz)  $\delta$  7.23 (t,  $J = 7.5$  Hz, 2H), 7.17 - 7.11 (m, 3H), 4.85 (s, 1H), 3.75 (s, 2H), 3.35 (s, 2H), 0.90 - 0.85 (m, 2H), 0.82 - 0.78 (m, 2H).  $^{13}\text{C}$  NMR ( $\text{CDCl}_3$ , TMS, 150 MHz)  $\delta$  139.3, 138.8, 132.0, 128.8, 128.5, 126.4, 41.0, 37.9, 36.6, 14.7. IR (neat)  $\nu$  733, 906, 1077, 1255, 1388, 2924, 2990  $\text{cm}^{-1}$ . HRMS (EI) calcd. for  $\text{C}_{13}\text{H}_{14}\text{S}$  ( $\text{M}^+$ ): 202.0809, Found: 202.0811.

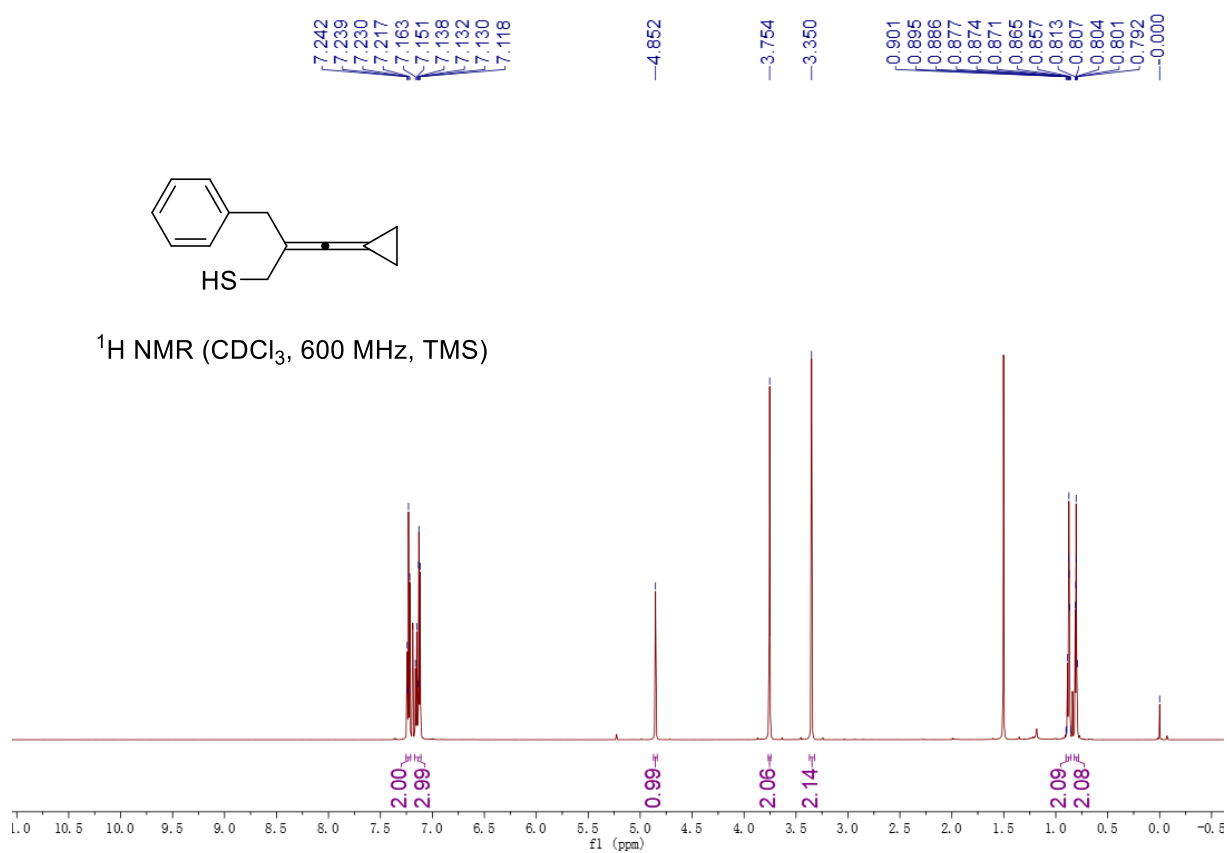

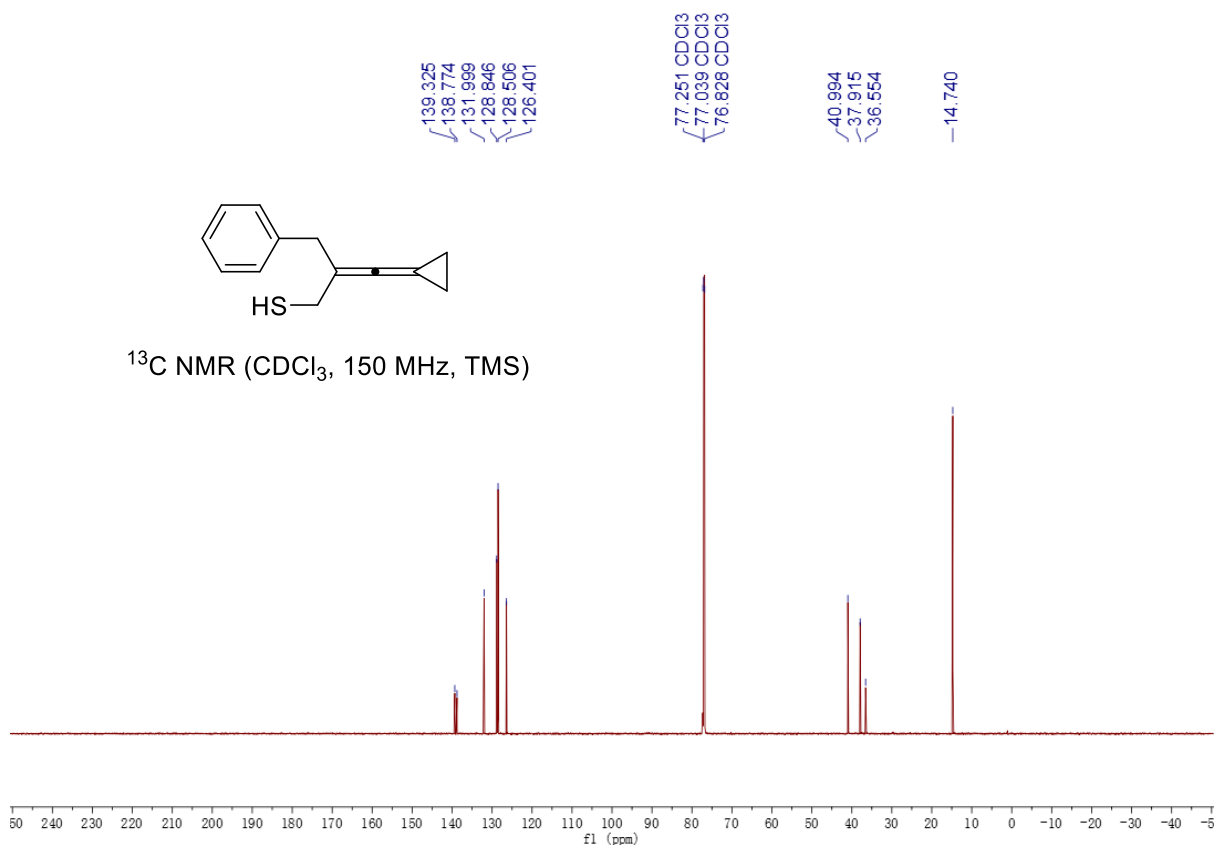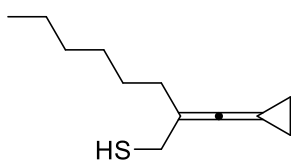

### 2-(cyclopropylidene- $\lambda^5$ -methylene)octane-1-thiol (7b)

A colorless oil, 30%, 58.9 mg.  $^1\text{H}$  NMR (CDCl<sub>3</sub>, TMS, 600 MHz)  $\delta$  4.93 (s, 1H), 3.87 (s, 2H), 2.09 (t,  $J = 7.7$  Hz, 2H), 1.50 - 1.39 (m, 2H), 1.35 - 1.21 (m, 8H), 0.96 - 0.93 (m, 2H), 0.89 - 0.86 (m, 5H).  $^{13}\text{C}$  NMR (CDCl<sub>3</sub>, TMS, 150 MHz)  $\delta$  140.4, 129.7, 41.3, 36.6, 34.1, 31.6, 31.3, 29.1, 27.9, 22.6, 22.3, 14.6, 14.1. IR (neat)  $\nu$  700, 928, 961, 1044, 1083, 1249, 1641, 2902 cm<sup>-1</sup>. HRMS (EI) calcd. for C<sub>12</sub>H<sub>20</sub>S (M<sup>+</sup>): 196.1278, Found: 196.1280.

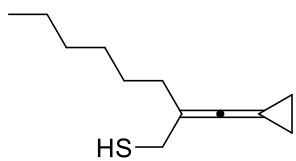

$^1\text{H NMR}$  ( $\text{CDCl}_3$ , 600 MHz, TMS)

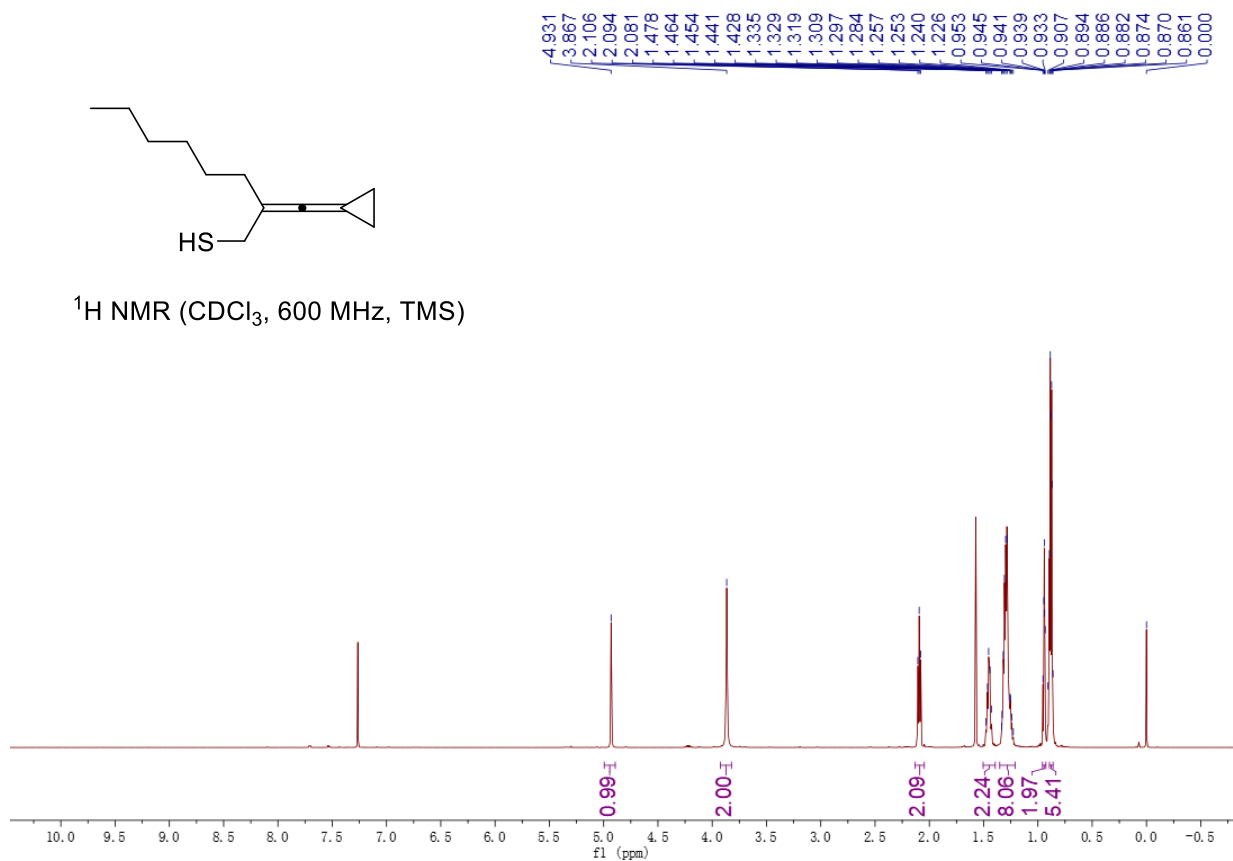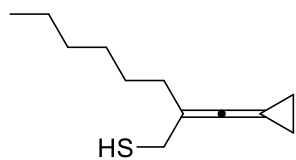

$^{13}\text{C NMR}$  ( $\text{CDCl}_3$ , 150 MHz, TMS)

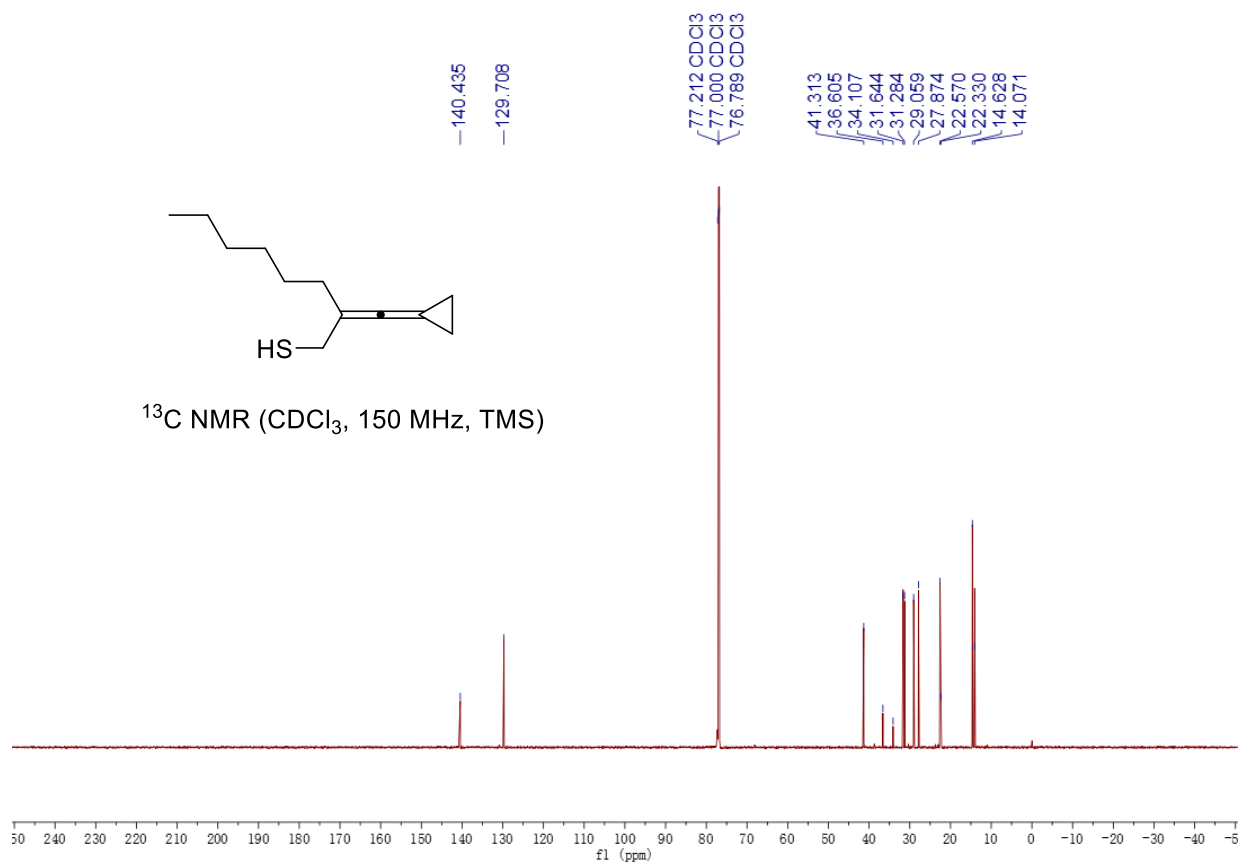

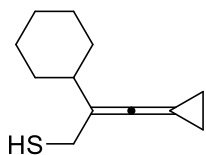

### 2-cyclohexyl-3-cyclopropylidene-3 $\lambda^5$ -prop-2-ene-1-thiol (7c)

A colorless oil, 35%, 68.0 mg.  $^1\text{H}$  NMR ( $\text{CDCl}_3$ , TMS, 600 MHz)  $\delta$  4.84 (s, 1H), 3.84 (s, 2H), 1.98 - 1.92 (m, 1H), 1.78 - 1.73 (m, 2H), 1.69 (dt,  $J = 12.9, 3.4$  Hz, 2H), 1.63 - 1.58 (m, 1H), 1.22 - 1.16 (m, 2H), 1.13 - 1.05 (m, 3H), 0.90 - 0.85 (m, 2H), 0.83 - 0.77 (m, 2H).  $^{13}\text{C}$  NMR ( $\text{CDCl}_3$ , TMS, 150 MHz)  $\delta$  145.5, 128.1, 40.2, 39.9, 36.5, 32.4, 32.2, 26.4, 26.2, 14.8. IR (neat)  $\nu$  699, 922, 950, 1084, 1103, 1284, 1643, 2900  $\text{cm}^{-1}$ . HRMS (EI) calcd. for  $\text{C}_{12}\text{H}_{20}\text{S}$  ( $\text{M}^+$ ): 194.1122, Found: 194.1124.

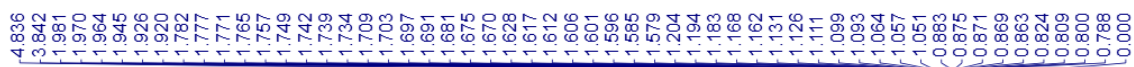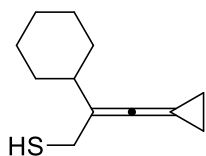

$^1\text{H}$  NMR ( $\text{CDCl}_3$ , 600 MHz, TMS)

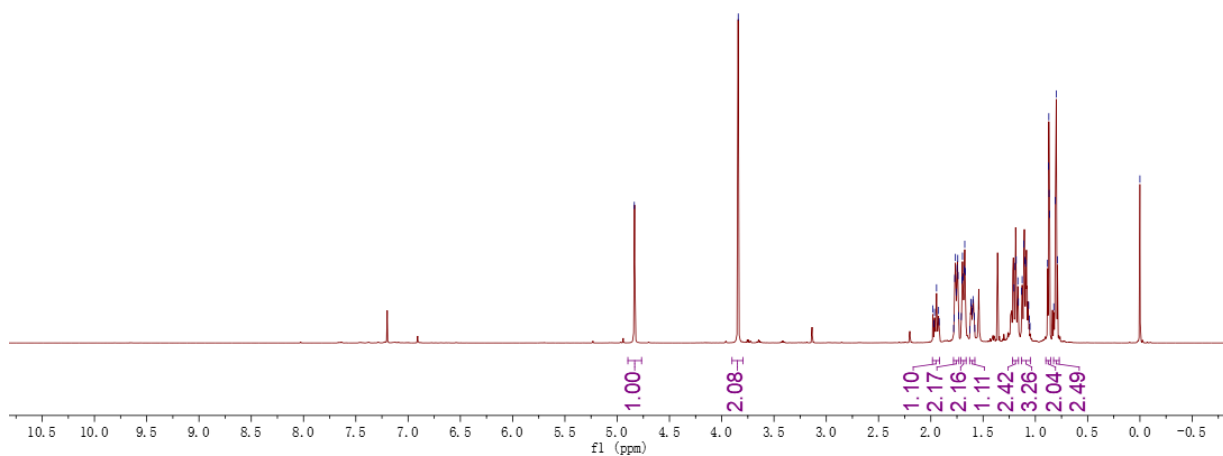

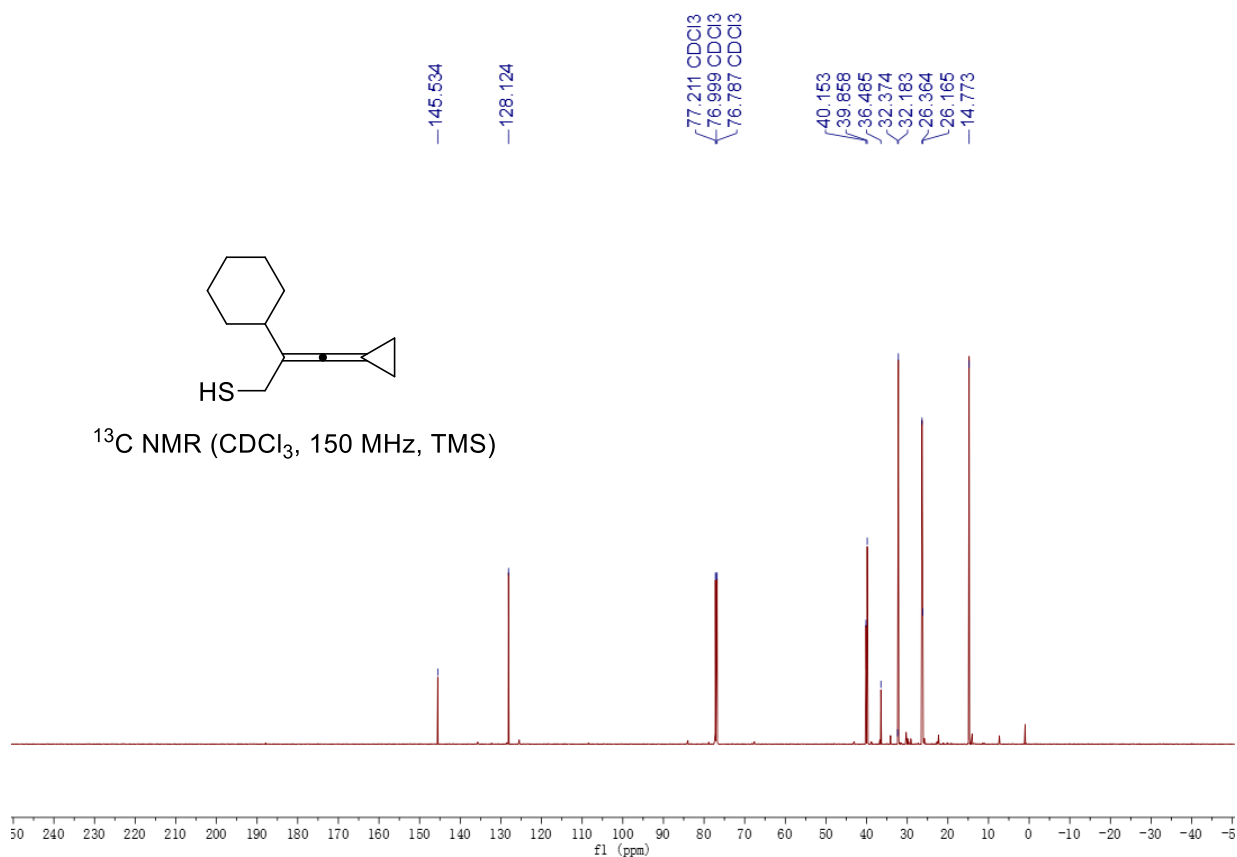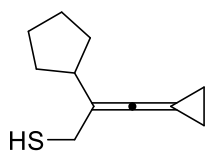

**2-cyclopentyl-3-cyclopropylidene-3λ<sup>5</sup>-prop-2-ene-1-thiol (7d)**

A colorless oil, 33%, 59.5 mg. <sup>1</sup>H NMR (CDCl<sub>3</sub>, TMS, 400 MHz) δ 4.94 (s, 1H), 3.91 (s, 2H), 2.56 - 2.42 (m, 1H), 1.88 - 1.79 (m, 2H), 1.72 - 1.63 (m, 2H), 1.61 - 1.56 (m, 2H), 1.47 - 1.34 (m, 2H), 0.97 - 0.92 (m, 2H), 0.90 - 0.86 (m, 2H). <sup>13</sup>C NMR (CDCl<sub>3</sub>, TMS, 150 MHz) δ 143.8, 128.3, 41.9, 40.3, 31.6, 25.0, 22.6, 14.7, 14.1. IR (neat) ν 701, 902, 946, 1101, 1133, 1254, 1601, 2913 cm<sup>-1</sup>. HRMS (EI) calcd. for C<sub>11</sub>H<sub>16</sub>S (M<sup>+</sup>): 180.0966, Found: 180.0967.

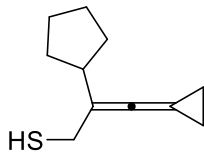

$^1\text{H}$  NMR ( $\text{CDCl}_3$ , 400 MHz, TMS)

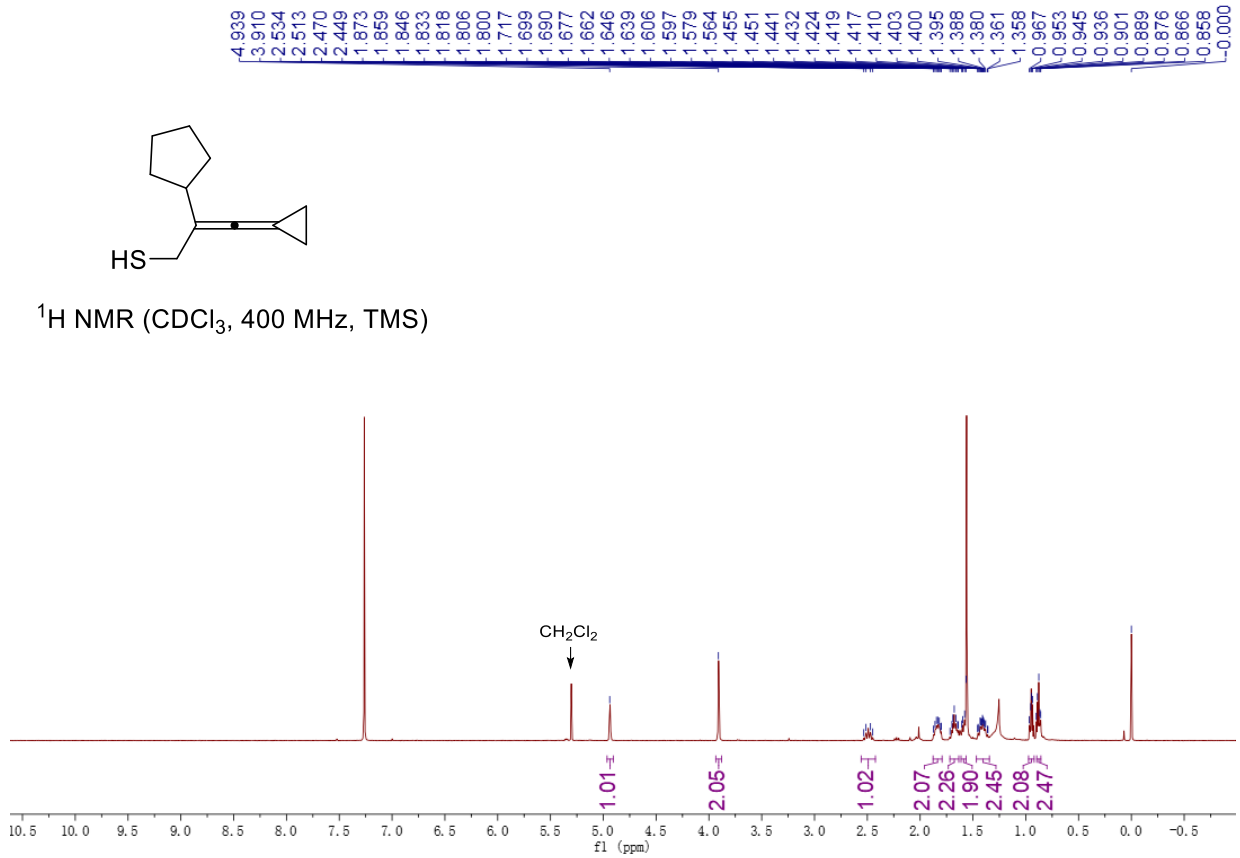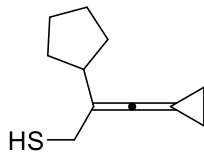

$^{13}\text{C}$  NMR ( $\text{CDCl}_3$ , 150 MHz, TMS)

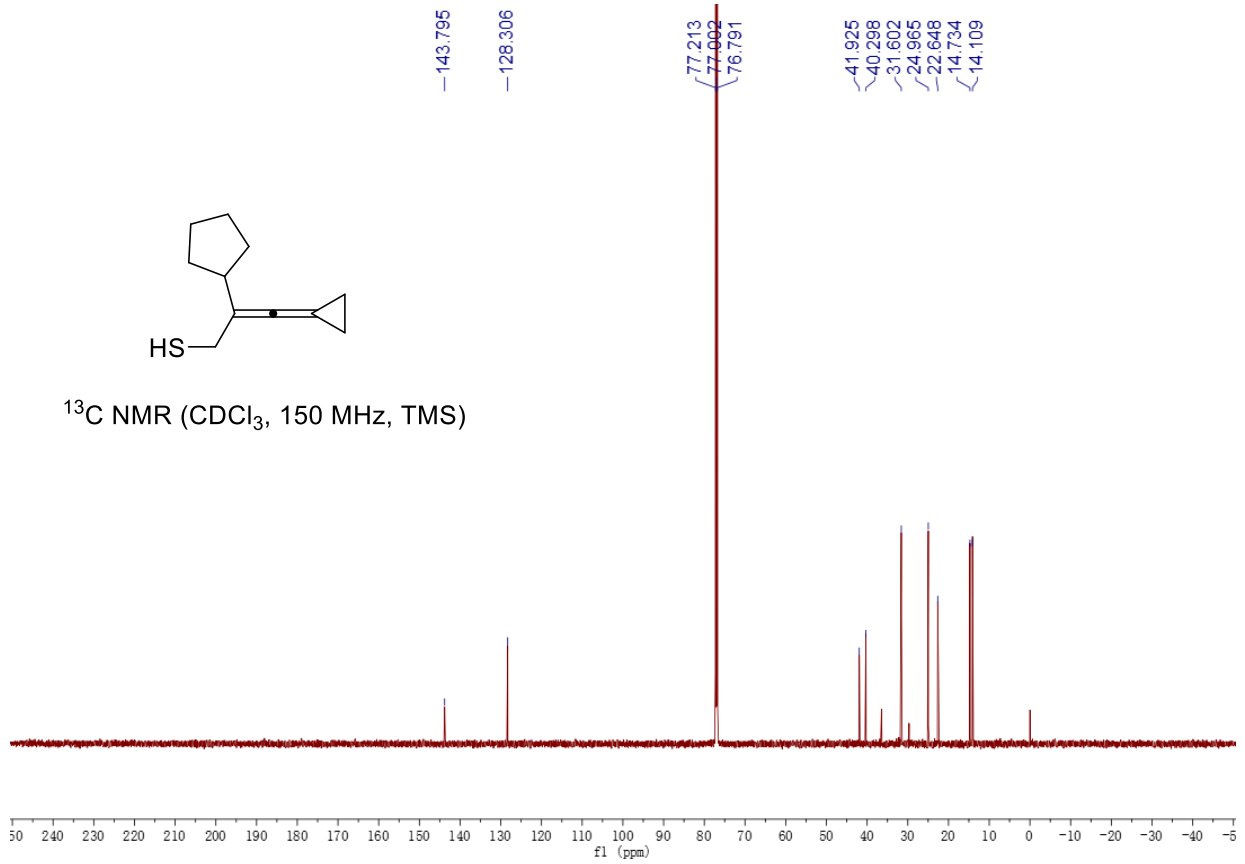



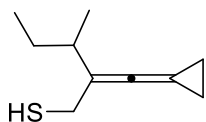

**2-(cyclopropylidene- $\lambda^5$ -methylene)-3-methylpentane-1-thiol (7e)**

A colorless oil, 36%, 60.6 mg.  $^1\text{H}$  NMR ( $\text{CDCl}_3$ , TMS, 600 MHz)  $\delta$  4.93 (s, 1H), 3.90 (d,  $J = 14.2$  Hz, 1H), 3.84 (d,  $J = 14.2$  Hz, 1H), 2.26 - 2.17 (m, 1H), 1.49 - 1.43 (m, 1H), 1.34 (dq,  $J = 14.4$  Hz, 1H), 1.06 (d,  $J = 6.9$  Hz, 3H), 0.97 - 0.93 (m, 2H), 0.90 - 0.85 (m, 5H).  $^{13}\text{C}$  NMR ( $\text{CDCl}_3$ , TMS, 150 MHz)  $\delta$  144.8, 129.4, 39.0, 37.2, 36.3, 28.1, 19.1, 14.8, 11.7. IR (neat)  $\nu$  720, 902, 961, 1034, 1083, 1264, 1603, 2920  $\text{cm}^{-1}$ . HRMS (EI) calcd. for  $\text{C}_{10}\text{H}_{16}\text{S}$  ( $\text{M}^+$ ): 168.0966, Found: 168.0967.

4.932  
3.915  
3.891  
3.866  
3.833  
2.247  
2.235  
2.224  
2.212  
2.201  
2.189  
1.494  
1.482  
1.471  
1.459  
1.447  
1.433  
1.372  
1.360  
1.349  
1.337  
1.325  
1.313  
1.062  
1.051  
0.959  
0.950  
0.947  
0.944  
0.938  
0.886  
0.883  
0.877  
0.873  
0.870  
0.861  
0.000

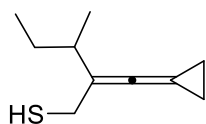

$^1\text{H}$  NMR ( $\text{CDCl}_3$ , 600 MHz, TMS)

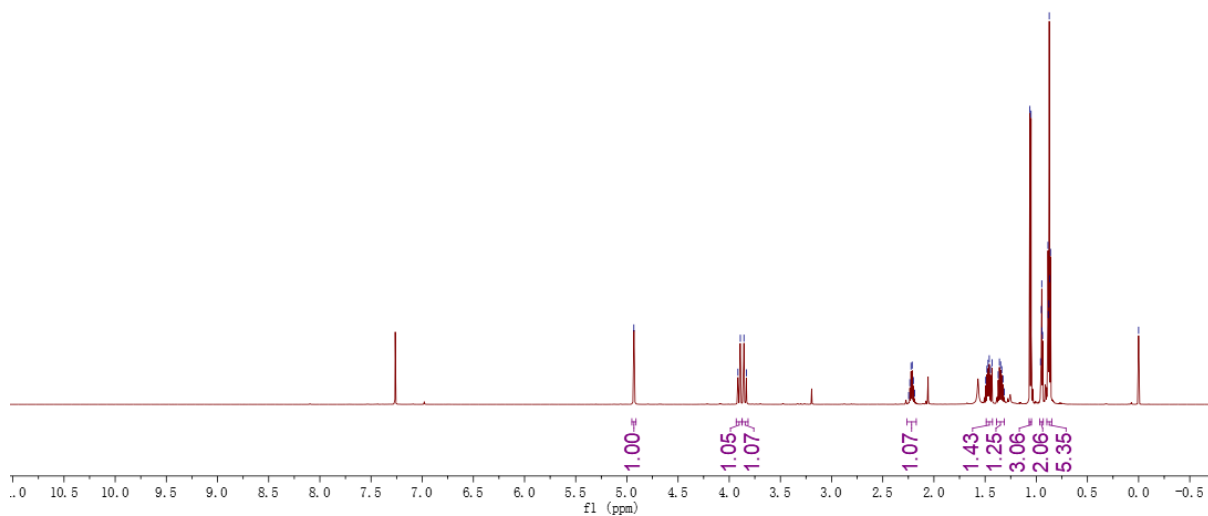

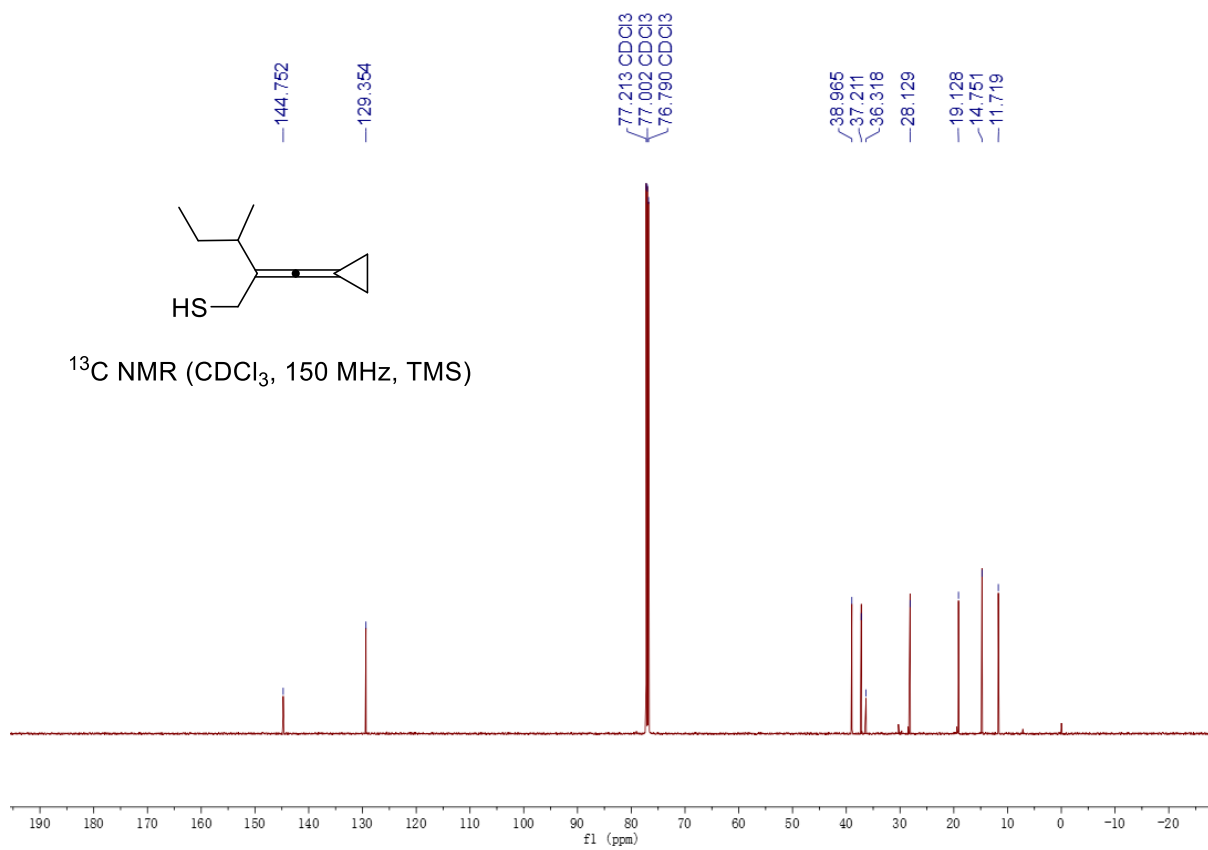

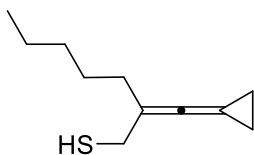

**2-(cyclopropylidene- $\lambda^5$ -methylene)heptane-1-thiol (7f)**

A colorless oil, 40%, 72.9 mg.  $^1\text{H}$  NMR ( $\text{CDCl}_3$ , TMS, 600 MHz)  $\delta$  4.93 (s, 1H), 3.87 (s, 2H), 2.09 (t,  $J = 7.7$  Hz, 2H), 1.49 - 1.43 (m, 2H), 1.34 - 1.26 (m, 4H), 0.96 - 0.93 (m, 2H), 0.91 - 0.86 (m, 5H).  $^{13}\text{C}$  NMR ( $\text{CDCl}_3$ , TMS, 150 MHz)  $\delta$  140.4, 129.7, 41.3, 36.6, 31.6, 31.2, 27.6, 22.5, 14.6, 14.0. IR (neat)  $\nu$  715, 916, 931, 1064, 1093, 1224, 1613, 2933  $\text{cm}^{-1}$ . HRMS (EI) calcd. for  $\text{C}_{11}\text{H}_{18}\text{S}$  ( $\text{M}^+$ ): 182.1122, Found: 182.1124.

4.933  
3.866  
2.106  
2.093  
2.080  
1.487  
1.462  
1.449  
1.432  
1.339  
1.324  
1.314  
1.306  
1.299  
1.294  
1.285  
1.277  
1.270  
1.264  
0.954  
0.945  
0.942  
0.939  
0.933  
0.905  
0.898  
0.893  
0.882  
0.873  
0.861  
0.000

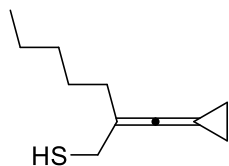

$^1\text{H}$  NMR ( $\text{CDCl}_3$ , 600 MHz, TMS)

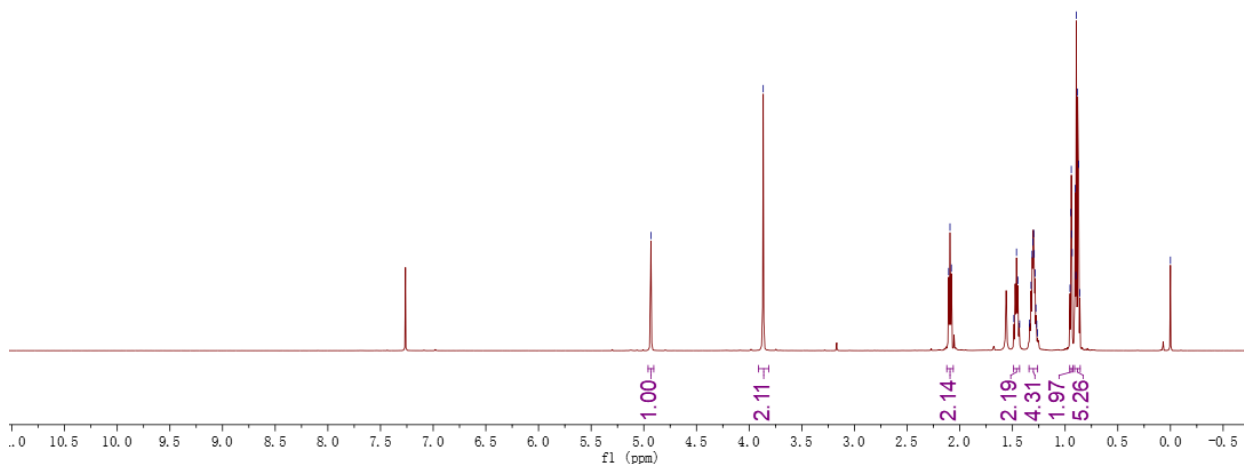

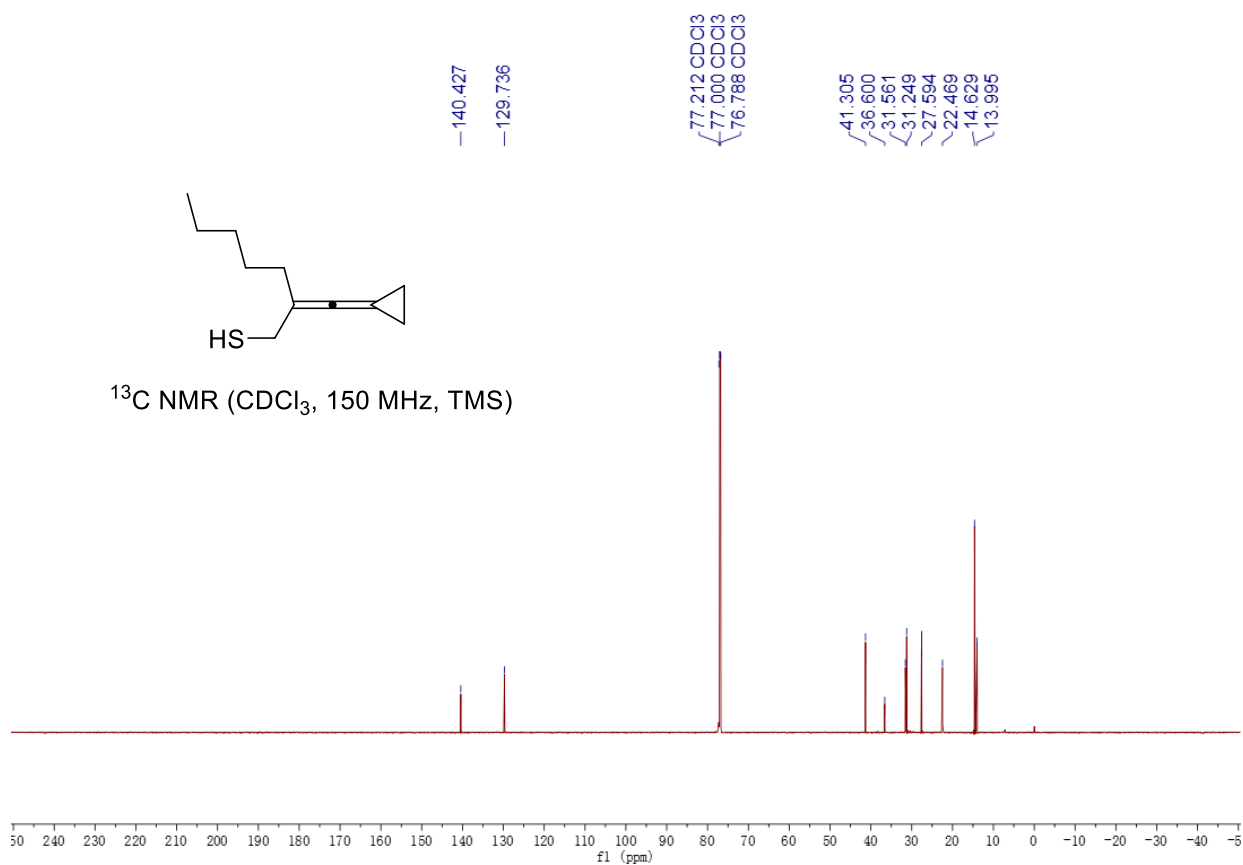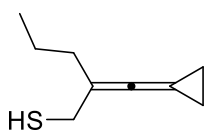

### 2-(cyclopropylidene- $\lambda^5$ -methylene)pentane-1-thiol (7g)

A colorless oil, 46%, 71.0 mg. <sup>1</sup>H NMR (CDCl<sub>3</sub>, TMS, 600 MHz)  $\delta$  4.94 - 4.93 (m, 1H), 3.87 - 3.86 (m, 2H), 2.10 - 2.06 (m, 2H), 1.52 - 1.46 (m, 2H), 0.96 - 0.90 (m, 5H), 0.89 - 0.86 (m, 2H). <sup>13</sup>C NMR (CDCl<sub>3</sub>, TMS, 150 MHz)  $\delta$  140.2, 129.9, 41.3, 36.6, 33.4, 21.1, 14.6, 13.9. IR (neat)  $\nu$  716, 921, 965, 1033, 1088, 1270, 1611, 2914 cm<sup>-1</sup>. HRMS (EI) calcd. for C<sub>9</sub>H<sub>14</sub>S (M<sup>+</sup>): 154.0811, Found: 154.0811.

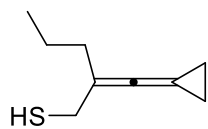

$^1\text{H}$  NMR ( $\text{CDCl}_3$ , 600 MHz, TMS)

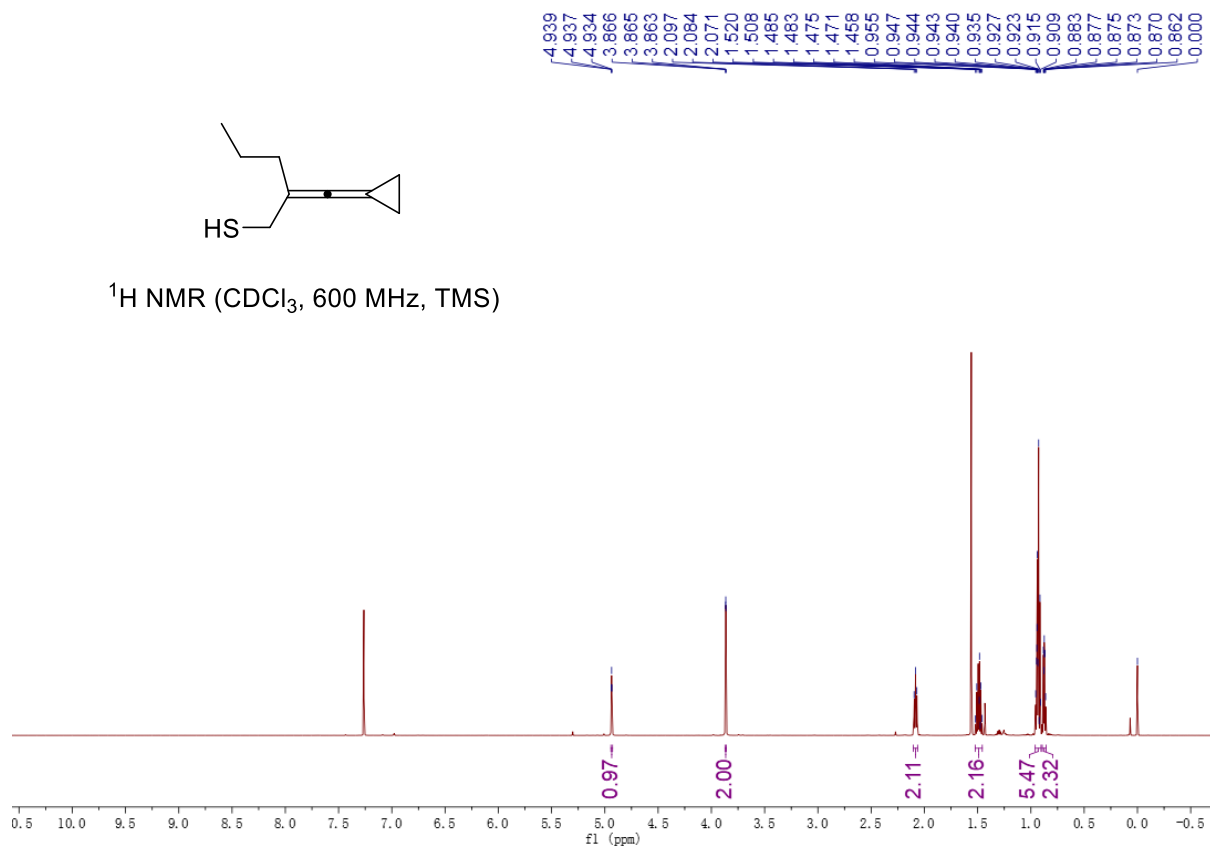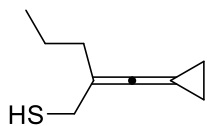

$^{13}\text{C}$  NMR ( $\text{CDCl}_3$ , 150 MHz, TMS)

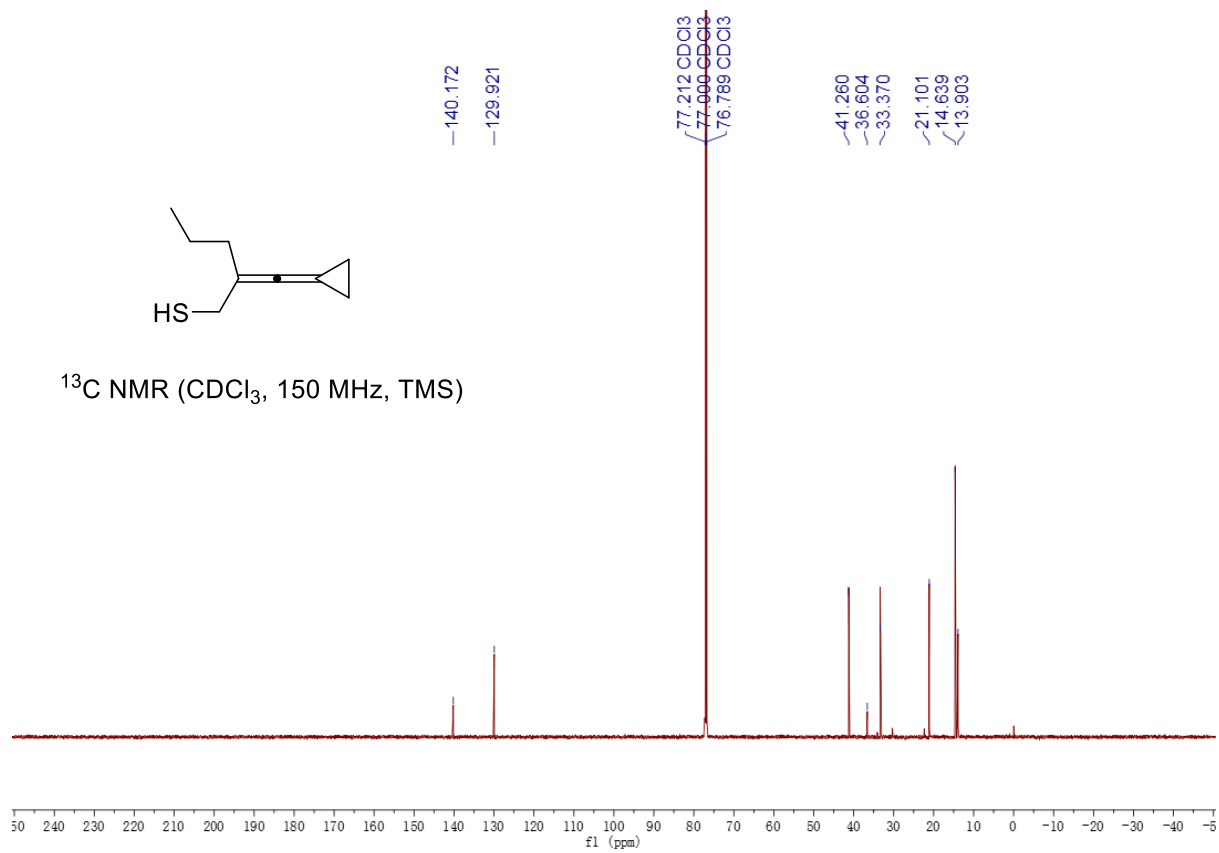

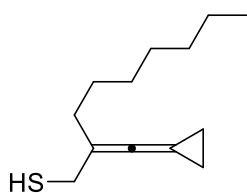

### 2-(cyclopropylidene- $\lambda^5$ -methylene)nonane-1-thiol (7h)

A colorless oil, 39%, 82.0 mg.  $^1\text{H}$  NMR ( $\text{CDCl}_3$ , TMS, 600 MHz)  $\delta$  4.93 (s, 1H), 3.86 (s, 2H), 2.11 - 2.07 (m, 2H), 1.48 - 1.43 (m, 2H), 1.31 - 1.26 (m, 8H), 0.96 - 0.93 (m, 2H), 0.90 - 0.86 (m, 5H).  $^{13}\text{C}$  NMR ( $\text{CDCl}_3$ , TMS, 150 MHz)  $\delta$  140.4, 129.7, 61.8, 41.3, 36.6, 31.8, 31.3, 29.3, 29.1, 27.9, 22.6, 14.6, 14.1. IR (neat)  $\nu$  718, 900, 966, 1038, 1072, 1253, 1631, 2928  $\text{cm}^{-1}$ . HRMS (EI) calcd. for  $\text{C}_{13}\text{H}_{22}\text{S}$  ( $\text{M}^+$ ): 210.1439, Found: 210.1437.

4.930  
3.864  
2.106  
2.104  
2.092  
2.080  
2.078  
1.489  
1.473  
1.468  
1.455  
1.448  
1.432  
1.312  
1.305  
1.289  
1.288  
1.275  
1.268  
1.255  
1.252  
0.952  
0.944  
0.940  
0.937  
0.931  
0.906  
0.895  
0.883  
0.880  
0.874  
0.872  
0.868  
0.860  
0.000

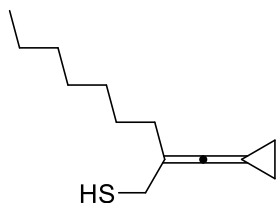

$^1\text{H}$  NMR ( $\text{CDCl}_3$ , 600 MHz, TMS)

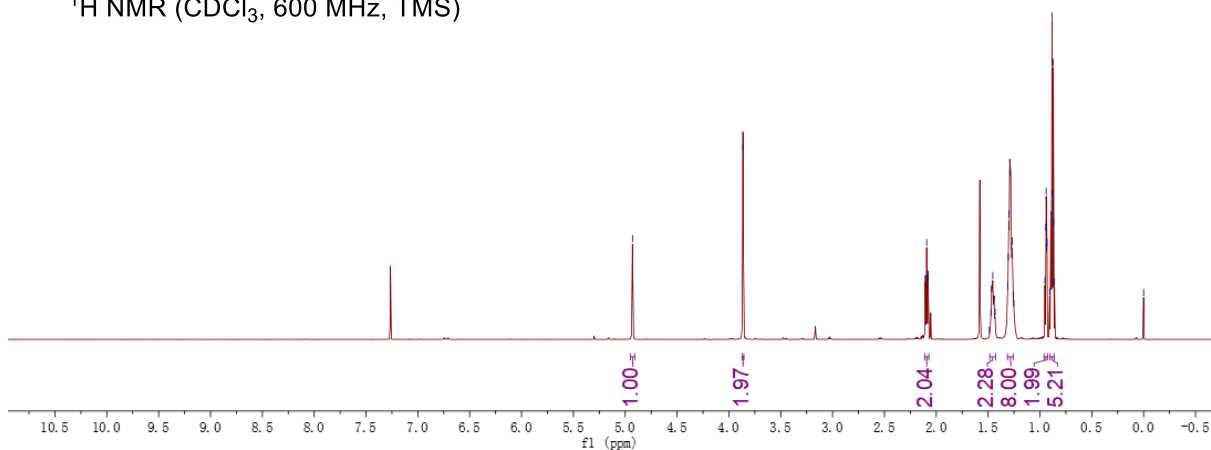

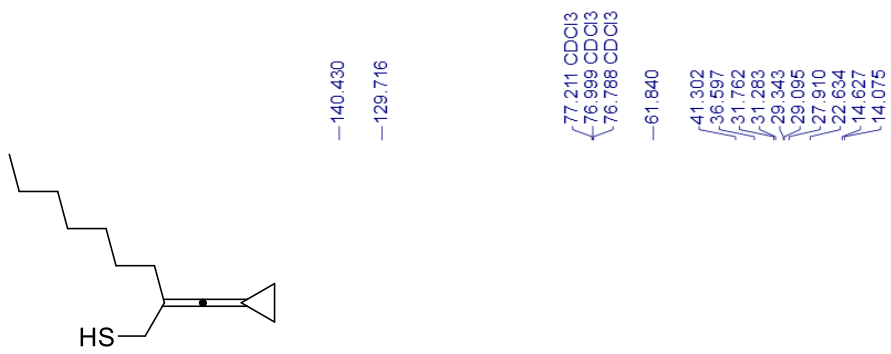

<sup>13</sup>C NMR (CDCl<sub>3</sub>, 150 MHz, TMS)

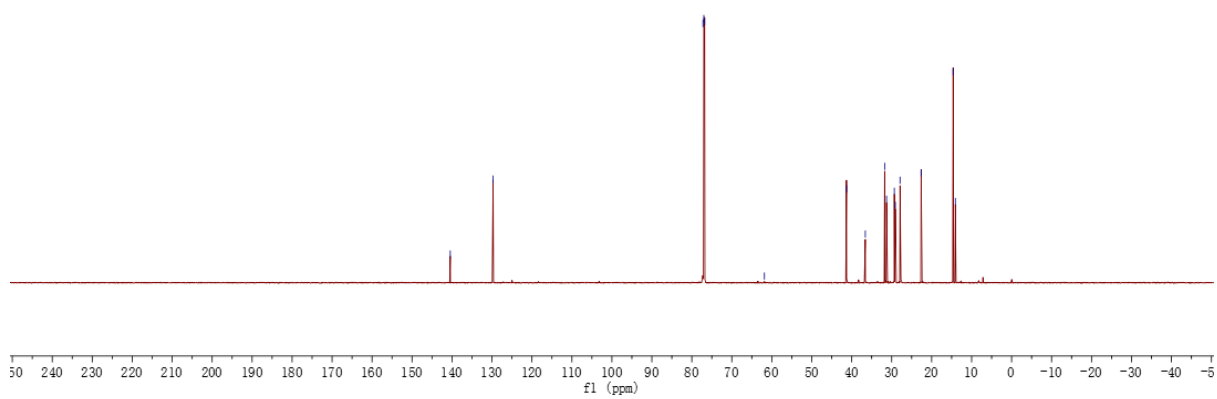

## 9. Spectroscopic data of products 3, 4, 6, 8, 9, 11, 12, 13.

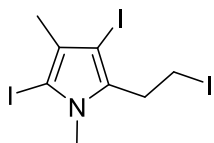

### 2,4-diiodo-5-(2-iodoethyl)-1,3-dimethyl-1H-pyrrole (3aa)

A colorless oil, 45.1 mg, 95% yield.  $^1\text{H}$  NMR ( $\text{CDCl}_3$ , TMS, 600 MHz)  $\delta$  3.60 (s, 3H), 3.31 - 3.23 (m, 2H), 3.18 - 3.10 (m, 2H), 2.04 (s, 3H).  $^{13}\text{C}$  NMR ( $\text{CDCl}_3$ , TMS, 150 MHz)  $\delta$  136.8, 133.2, 126.6, 117.0, 71.1, 68.5, 51.4, 33.1, 16.7, 1.9. IR (Neat)  $\nu$  722, 1007, 1051, 1168, 1332, 1387, 1431, 2843, 2920  $\text{cm}^{-1}$ . HRMS (EI) calcd. for  $\text{C}_8\text{H}_{10}\text{I}_3\text{N}$ : 500.7947, Found: 500.7942.

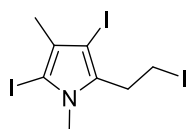

$^1\text{H}$  NMR ( $\text{CDCl}_3$ , 600 MHz, TMS)

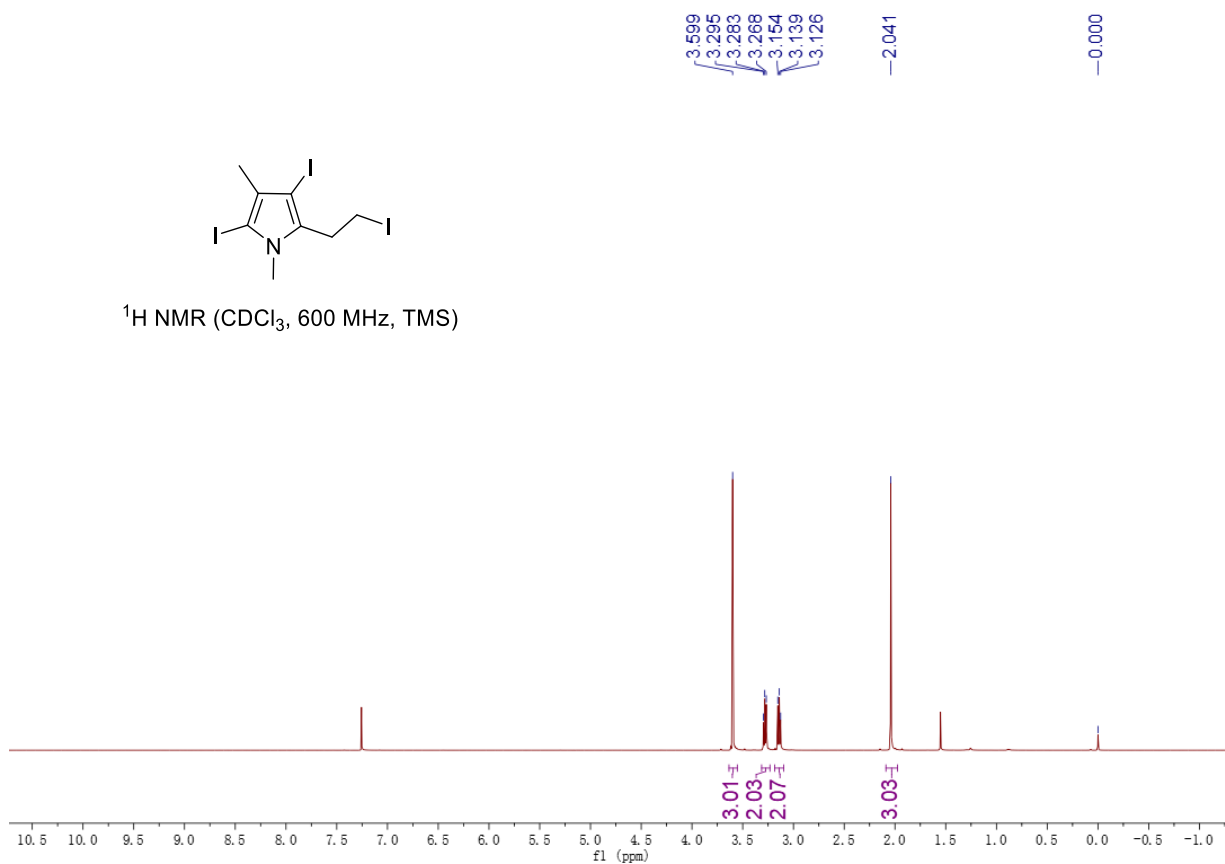



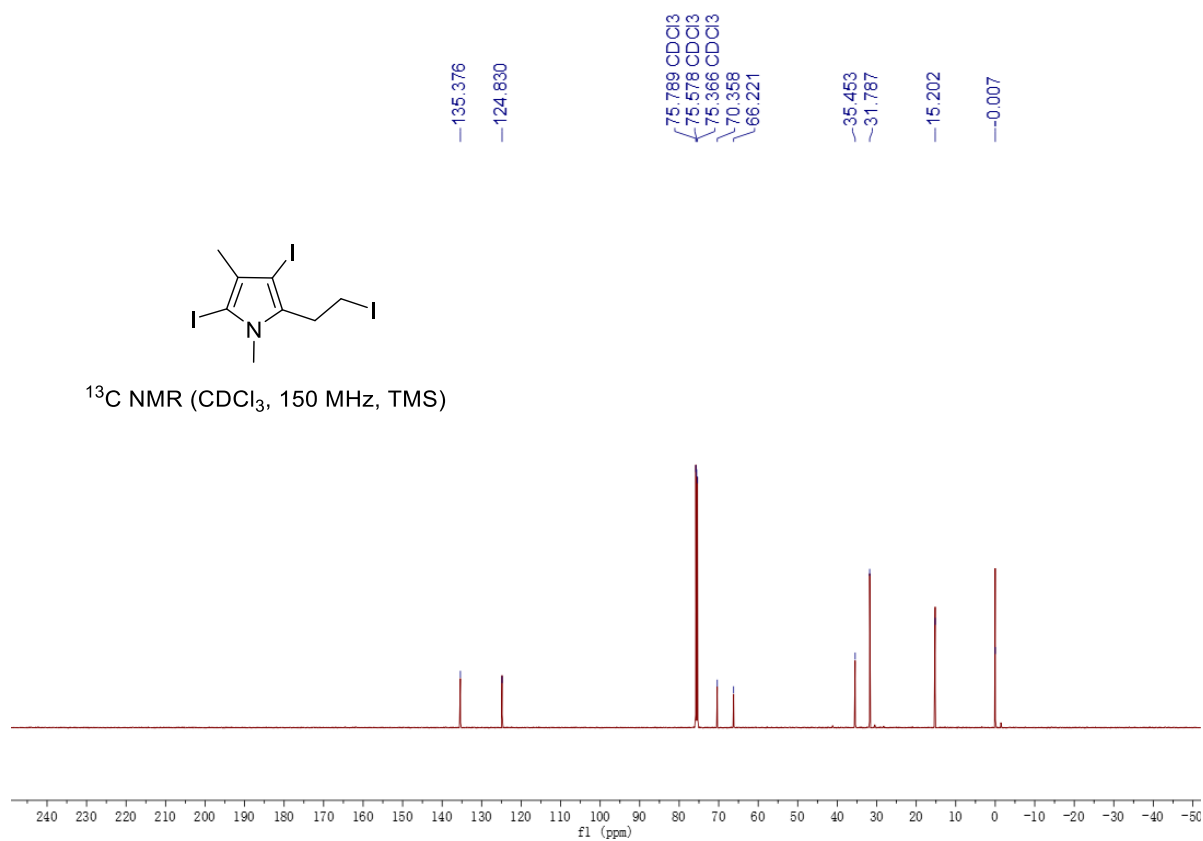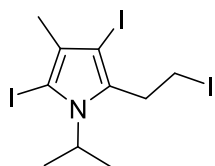

### 2,4-diiodo-5-(2-iodoethyl)-1-isopropyl-3-methyl-1H-pyrrole (3ba)

A colorless oil, 51.6 mg, 20% yield. <sup>1</sup>H NMR (CDCl<sub>3</sub>, TMS, 600 MHz) 4.63 (s, 1H), 3.29 (s, 2H), 3.14 (s, 2H), 2.04 (s, 3H), 1.52 (s, 6H). <sup>13</sup>C NMR (CDCl<sub>3</sub>, TMS, 150 MHz) δ 135.9, 126.2, 114.2, 54.5, 34.2, 22.6, 17.0, 1.5. IR (Neat) ν 2960, 2917, 1486, 1456, 1392, 1352, 1311, 1219, 1069, 1035, 1008, 820, 748, 735, 721 cm<sup>-1</sup>. HRMS (ESI) calcd. for C<sub>10</sub>H<sub>15</sub>I<sub>3</sub>N (M+H): 529.8260, Found: 529.8271.

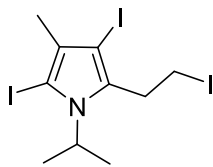

<sup>1</sup>H NMR (CDCl<sub>3</sub>, 600 MHz, TMS)

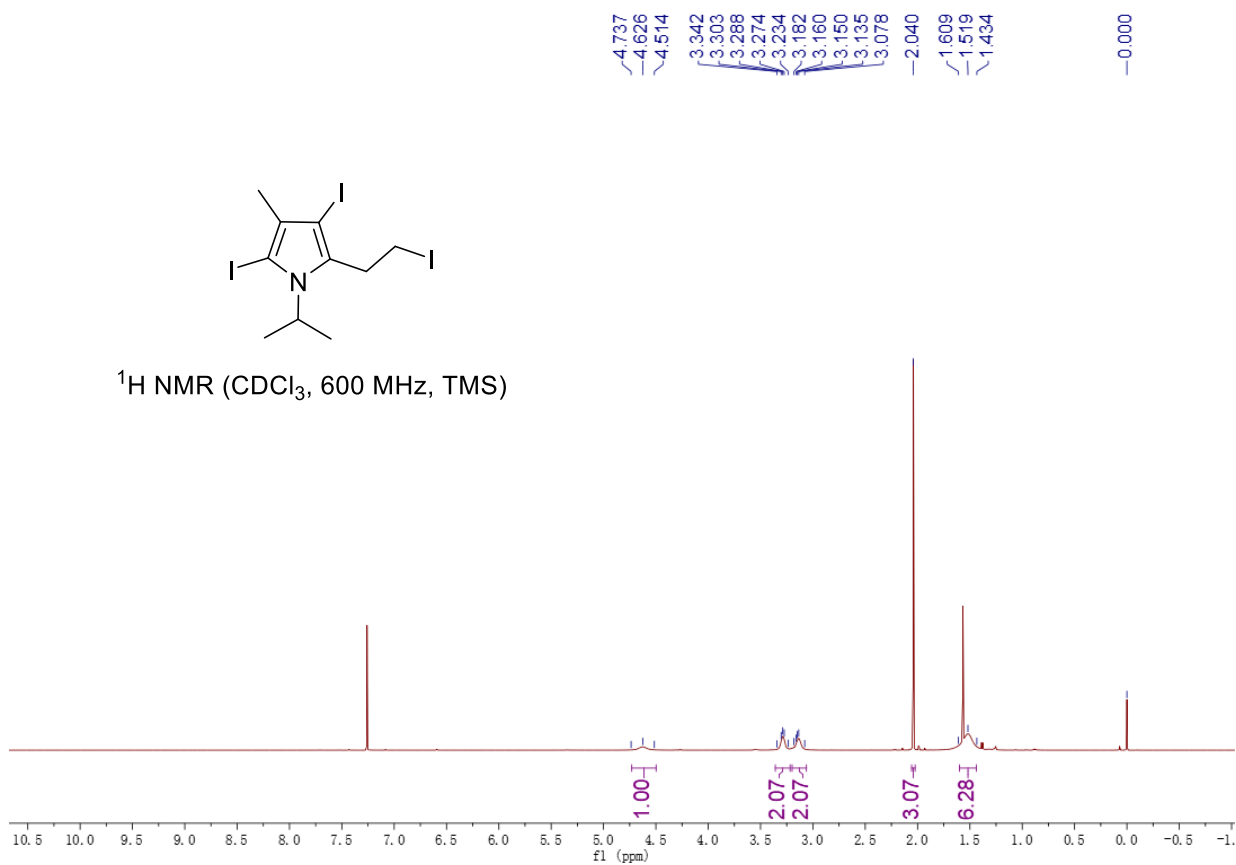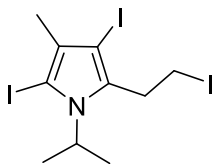

<sup>13</sup>C NMR (CDCl<sub>3</sub>, 150 MHz, TMS)

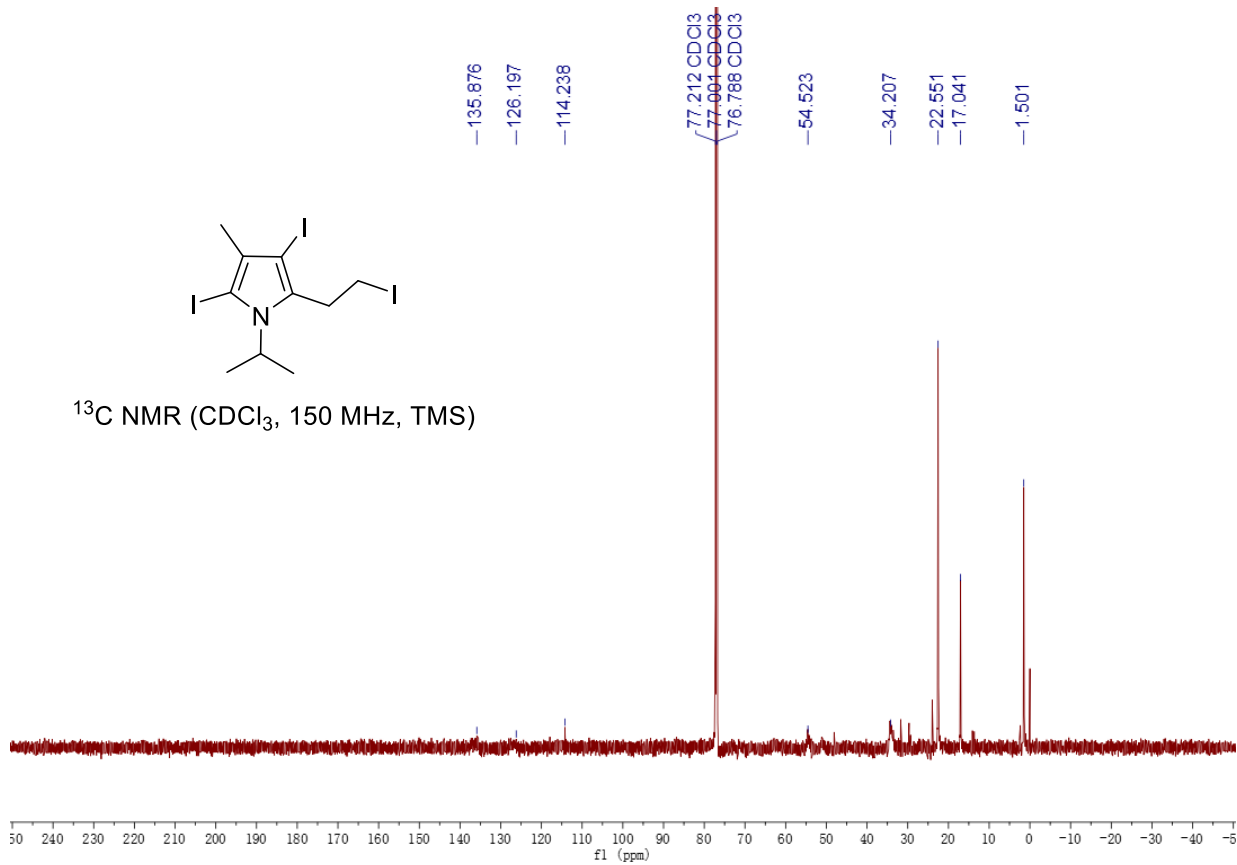

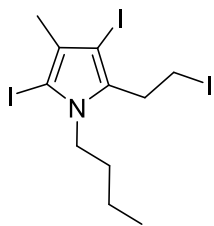

**1-butyl-2,4-diiodo-5-(2-iodoethyl)-3-methyl-1H-pyrrole (3ca)**

A colorless oil, 48.3 mg, 89% yield.  $^1\text{H}$  NMR ( $\text{CDCl}_3$ , TMS, 600 MHz)  $\delta$  3.93 - 3.86 (m, 2H), 3.28 - 3.20 (m, 2H), 3.18 - 3.12 (m, 2H), 2.03 (s, 3H), 1.63 - 1.56 (m, 3H), 1.43 - 1.33 (m, 2H), 0.98 (t,  $J = 7.4$  Hz, 3H).  $^{13}\text{C}$  NMR ( $\text{CDCl}_3$ , TMS, 150 MHz)  $\delta$  136.3, 126.3, 70.5, 68.0, 49.3, 33.6, 33.2, 32.7, 19.85, 19.83, 16.6, 13.8, 1.7. IR (Neat)  $\nu$  731, 1009, 1099, 1244, 1380, 1465, 2864, 2956  $\text{cm}^{-1}$ . HRMS (EI) calcd. for  $\text{C}_{11}\text{H}_{16}\text{I}_3\text{N}$ : 542.8428, Found: 542.8411.

3.908  
3.895  
3.881  
3.261  
3.248  
3.243  
3.231  
3.165  
3.163  
3.153  
3.148  
3.137  
2.033  
1.615  
1.602  
1.589  
1.576  
1.397  
1.384  
1.372  
1.359  
0.988  
0.976  
0.963  
0.000

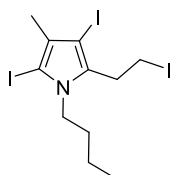

$^1\text{H}$  NMR ( $\text{CDCl}_3$ , 600 MHz, TMS)

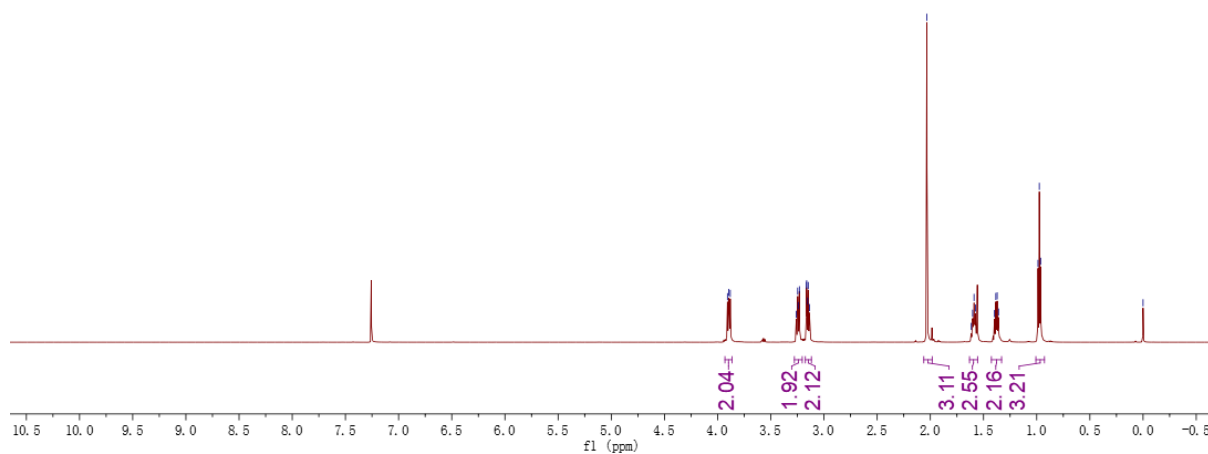

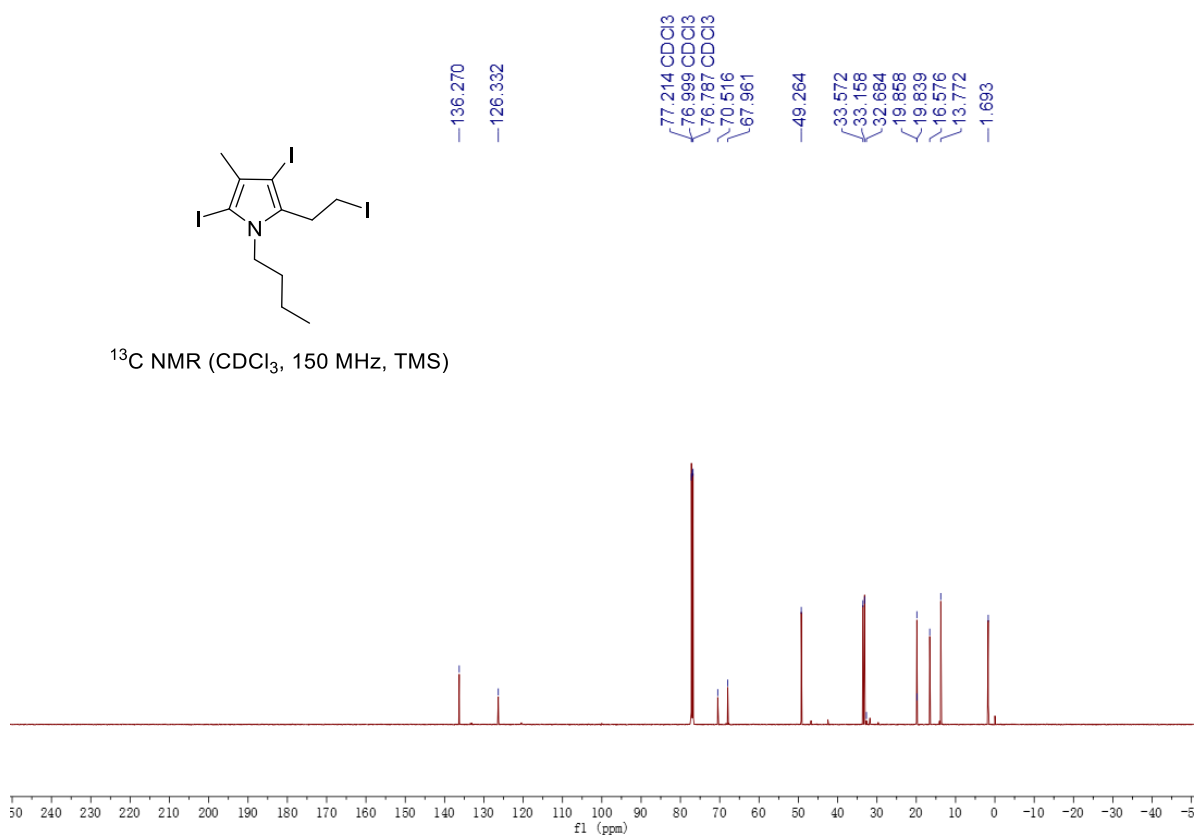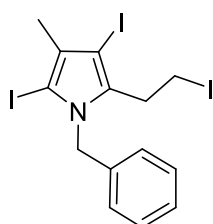

### 1-benzyl-2,4-diiodo-5-(2-iodoethyl)-3-methyl-1H-pyrrole (3da)

A colorless oil, 41.5 mg, 72% yield. <sup>1</sup>H NMR (CDCl<sub>3</sub>, TMS, 400 MHz) δ 7.37 - 7.27 (m, 3H), 6.95 (d, *J* = 7.5 Hz, 2H), 5.21 (s, 2H), 3.21 - 3.10 (m, 2H), 2.90 - 2.79 (m, 2H), 2.10 (s, 3H). <sup>13</sup>C NMR (CDCl<sub>3</sub>, TMS, 100 MHz) δ 137.1, 129.0, 127.7, 126.8, 125.9, 72.1, 69.1, 52.7, 33.3, 16.8, 1.5. IR (Neat) ν 693, 727, 1029, 1173, 1443, 1495, 2927 cm<sup>-1</sup>. HRMS (ESI) calcd. for C<sub>14</sub>H<sub>15</sub>I<sub>3</sub>N (M+H): 577.8342, Found: 577.8490.

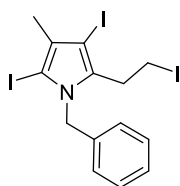

$^1\text{H}$  NMR ( $\text{CDCl}_3$ , 400 MHz, TMS)

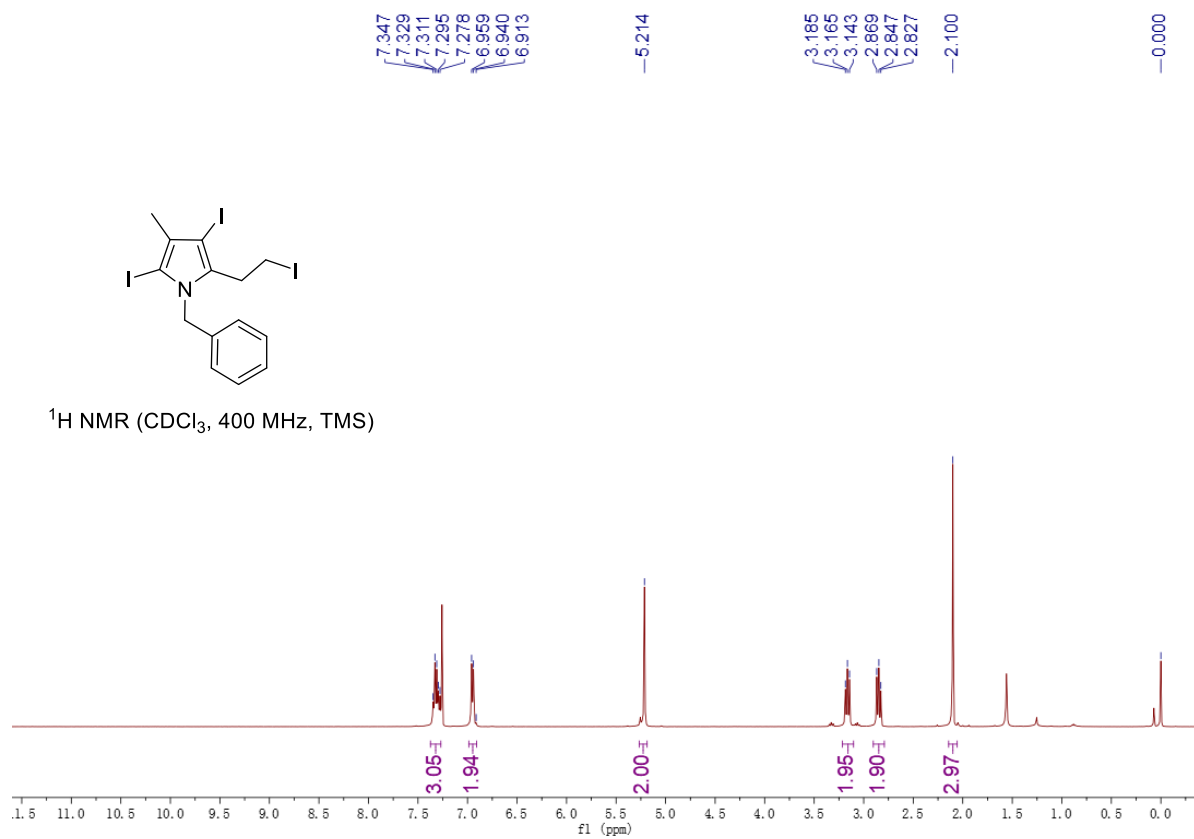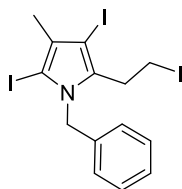

$^{13}\text{C}$  NMR ( $\text{CDCl}_3$ , 100 MHz, TMS)

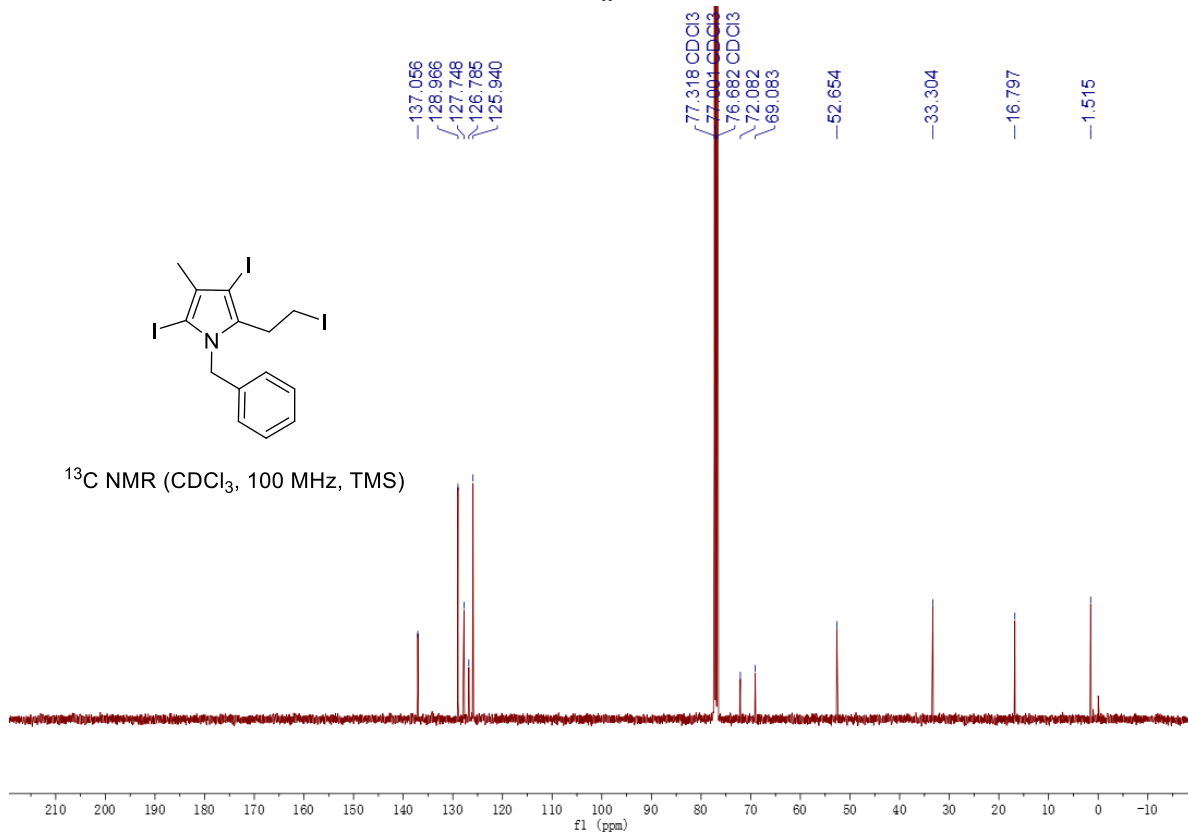

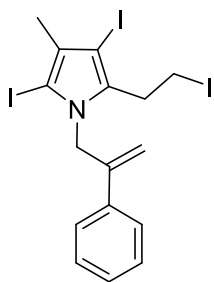

### 2,4-diiodo-5-(2-iodoethyl)-3-methyl-1-(2-phenylallyl)-1H-pyrrole (3ea)

A colorless oil, 40.2 mg, 82% yield.  $^1\text{H}$  NMR ( $\text{CDCl}_3$ , TMS, 400 MHz)  $\delta$  7.50 - 7.32 (m, 5H), 5.38 (s, 1H), 4.91 (s, 2H), 4.25 (s, 1H), 3.26 - 3.14 (m, 4H), 2.10 (s, 3H).  $^{13}\text{C}$  NMR ( $\text{CDCl}_3$ , TMS, 100 MHz)  $\delta$  143.7, 138.2, 136.9, 128.7, 128.4, 126.7, 125.9, 113.1, 71.9, 68.7, 52.5, 33.1, 16.7, 2.1. IR (Neat)  $\nu$  705, 779, 898, 1164, 1257, 1333, 1430, 2846, 2922  $\text{cm}^{-1}$ . HRMS (EI) calcd. for  $\text{C}_{16}\text{H}_{16}\text{I}_3\text{N}$ : 602.8436, Found: 602.8411.

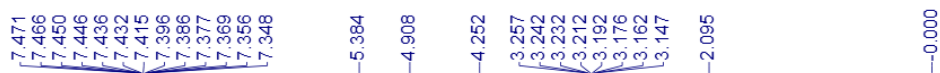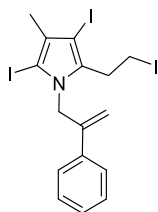

$^1\text{H}$  NMR ( $\text{CDCl}_3$ , 400 MHz, TMS)

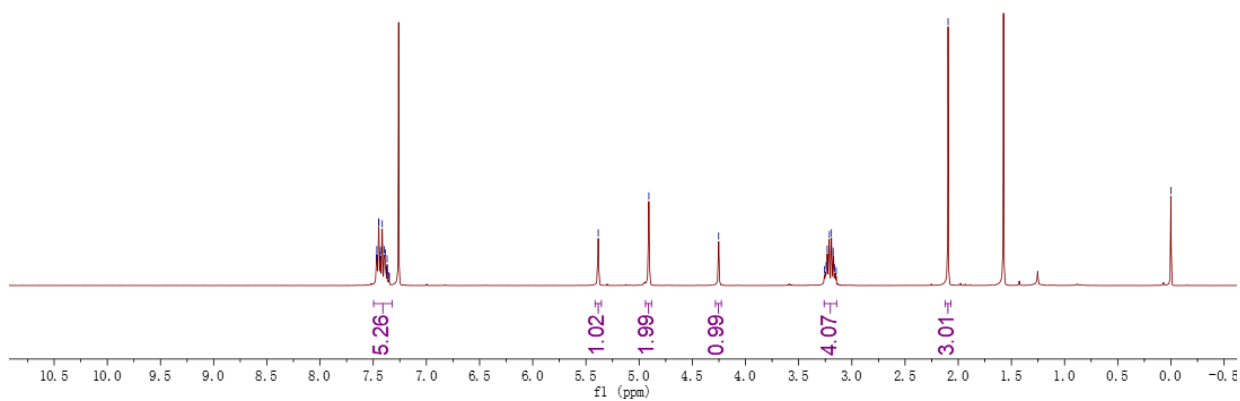

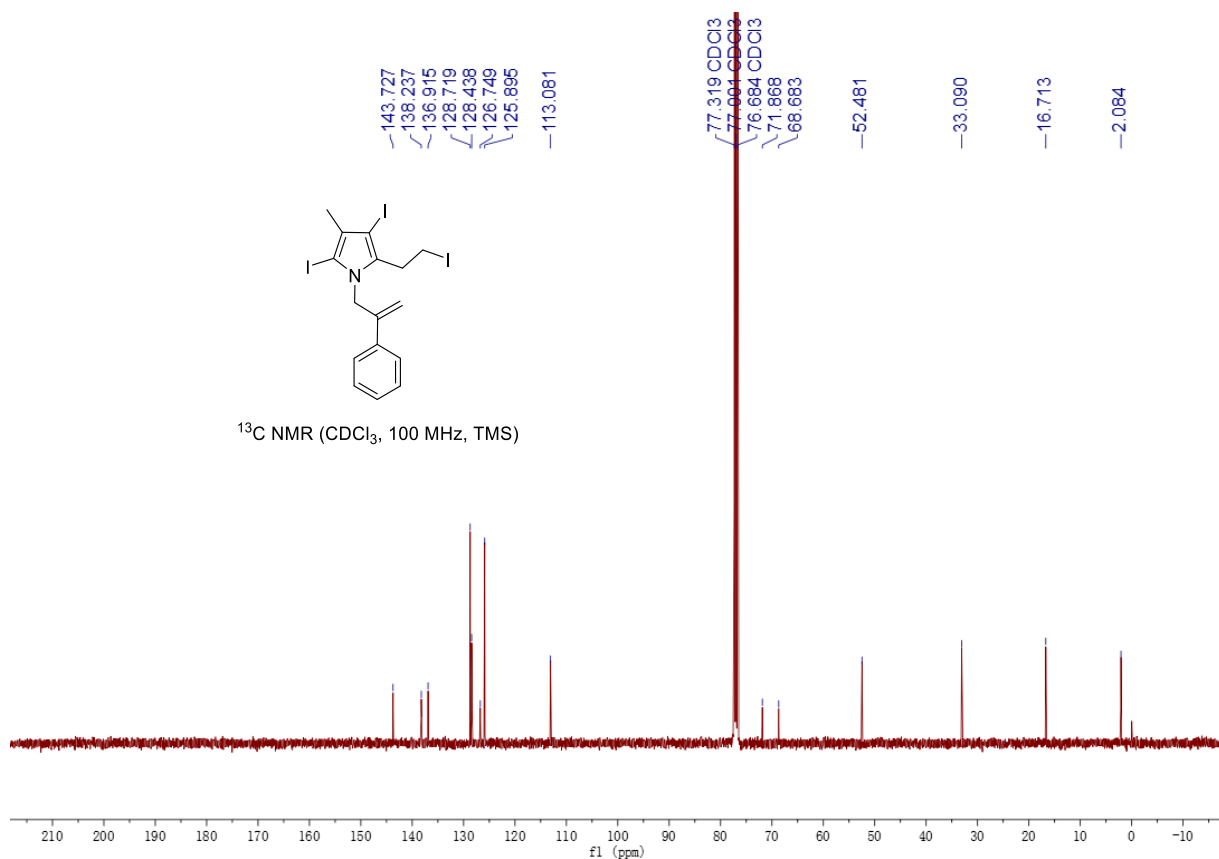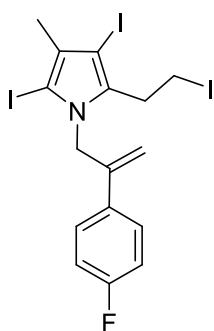

**1-(2-(4-fluorophenyl)allyl)-2,4-diiodo-5-(2-iodoethyl)-3-methyl-1H-pyrrole (3fa)**

A colorless oil, 48.4 mg, 78% yield. <sup>1</sup>H NMR (CDCl<sub>3</sub>, TMS, 400 MHz) δ δ 7.47 - 7.37 (m, 2H), 7.15 - 7.04 (m, 2H), 5.33 (s, 1H), 4.87 (s, 2H), 4.26 (s, 1H), 3.27 - 3.12 (m, 4H), 2.09 (s, 3H). <sup>13</sup>C NMR (CDCl<sub>3</sub>, TMS, 100 MHz) δ 162.8 (d, *J* = 240.0 Hz), 142.8, 136.9, 134.3 (d, *J* = 3.6 Hz), 127.6 (d, *J* = 8.0 Hz), 126.9, 115.6 (d, *J* = 21.6 Hz), 113.2, 71.8, 68.8, 52.5, 33.1, 16.7, 2.0. <sup>19</sup>F NMR (CDCl<sub>3</sub>, TMS, 376 MHz) δ -113.3. IR (Neat) ν 734, 835, 906, 1161, 1233, 1331, 1399, 1508, 1602, 2919 cm<sup>-1</sup>. HRMS (EI) calcd. for C<sub>16</sub>H<sub>15</sub>FI<sub>3</sub>N: 620.8336, Found: 620.8317.

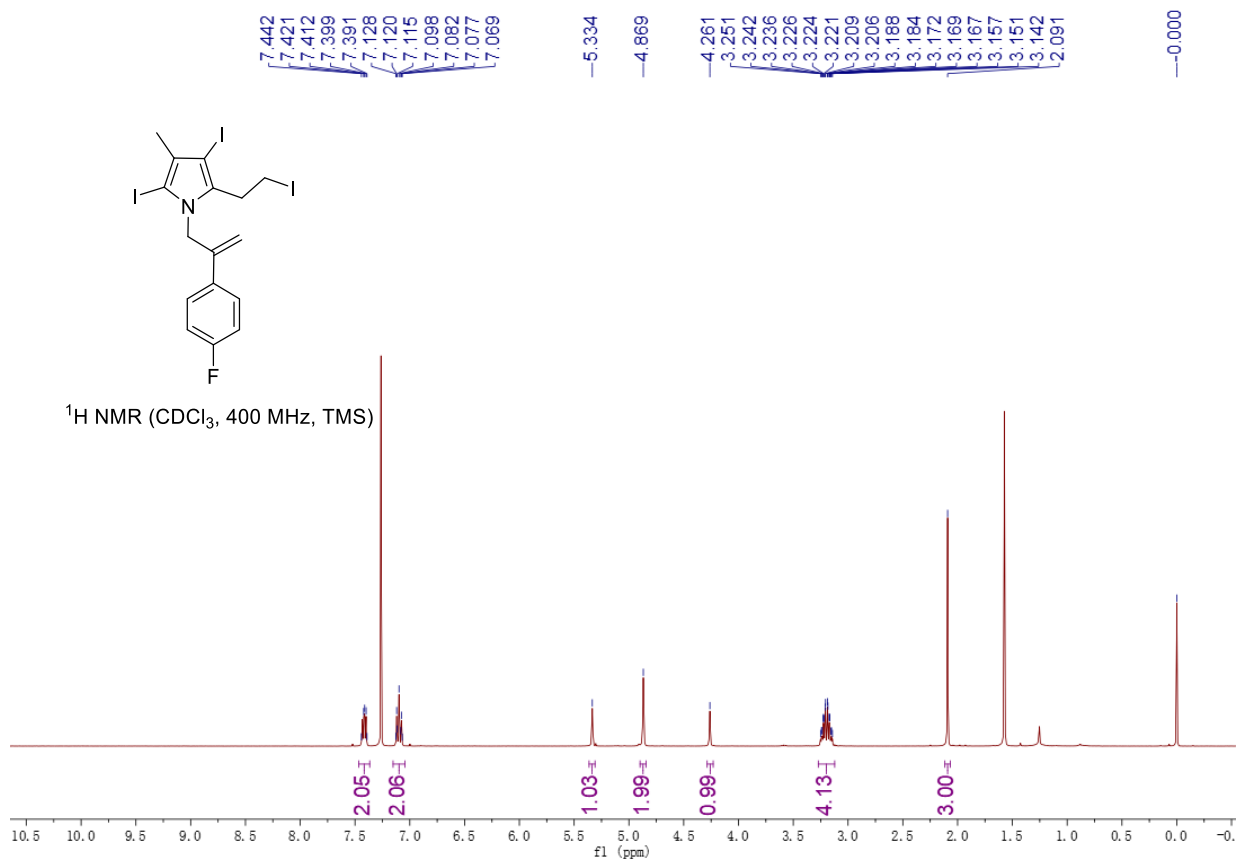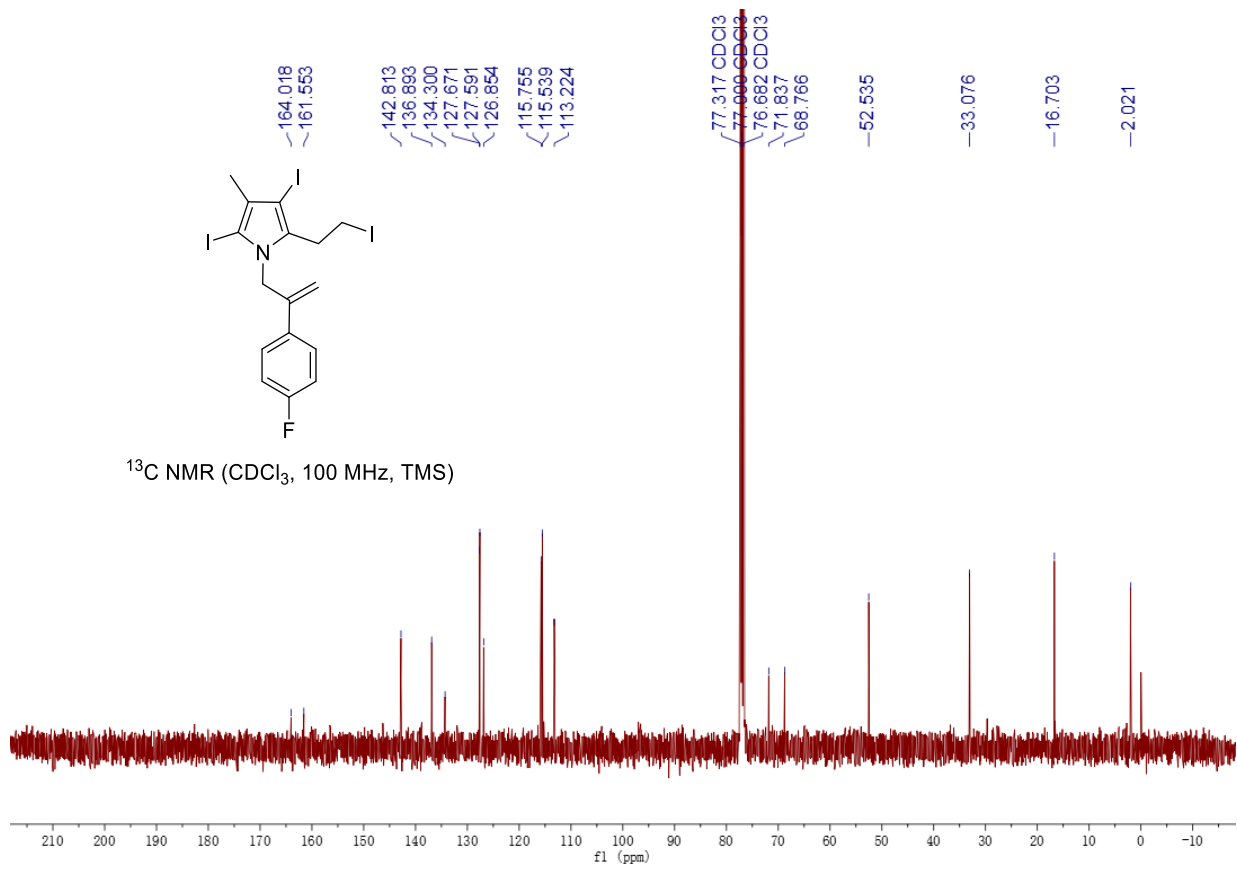



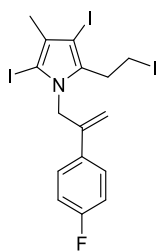

$^{19}\text{F}$  NMR ( $\text{CDCl}_3$ , 376 MHz, TMS)

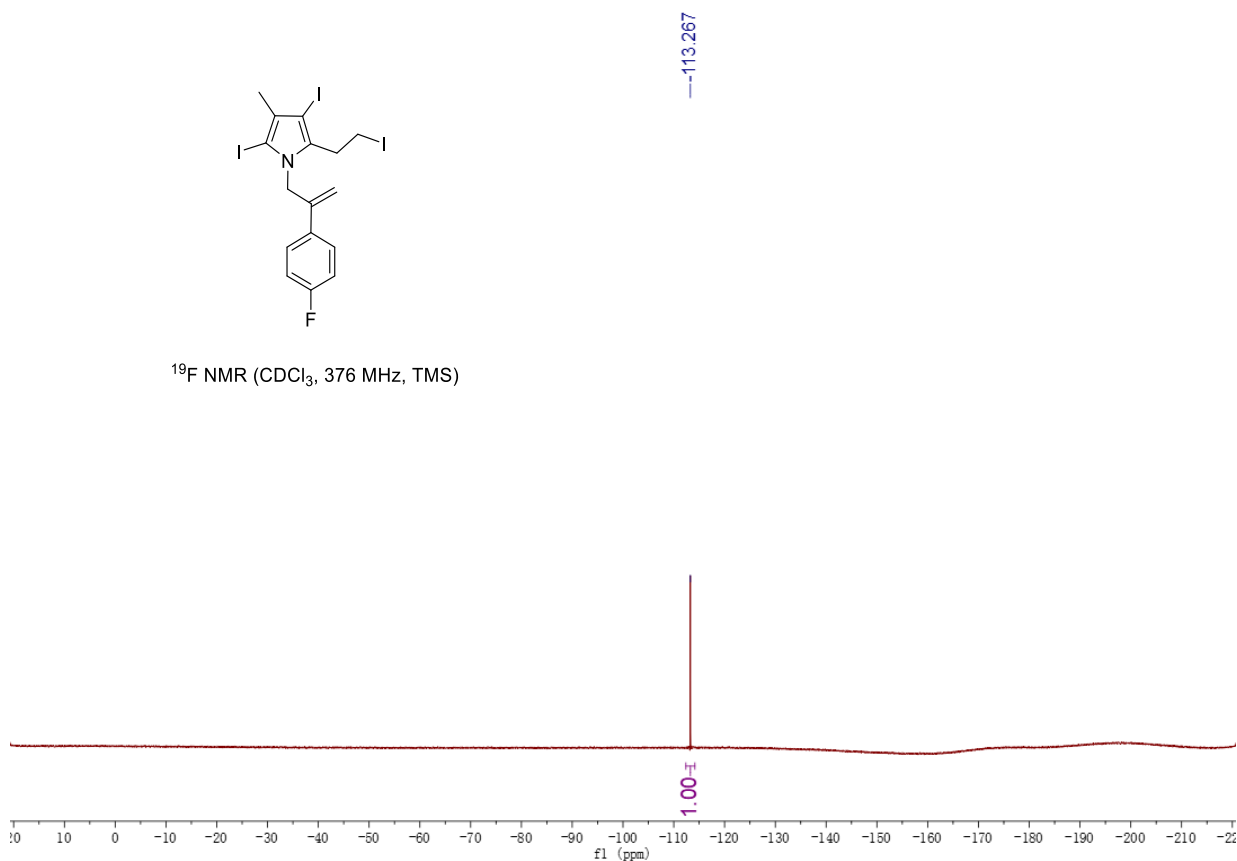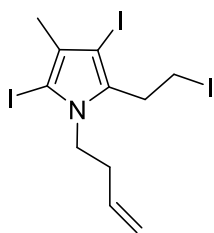

**1-(but-3-en-1-yl)-2,4-diiodo-5-(2-iodoethyl)-3-methyl-1H-pyrrole (3ga)**

A colorless oil, 48.1 mg, 89% yield.  $^1\text{H}$  NMR ( $\text{CDCl}_3$ , TMS, 600 MHz)  $\delta$  5.80 - 5.72 (m, 1H), 5.17 - 5.09 (m, 2H), 4.00 - 3.94 (m, 2H), 3.27 - 3.23 (m, 2H), 3.18 - 3.14 (m, 2H), 2.40 - 2.32 (m, 2H), 2.04 (s, 3H).  $^{13}\text{C}$  NMR ( $\text{CDCl}_3$ , TMS, 100 MHz)  $\delta$  136.4, 133.4, 126.6, 118.0, 70.3, 68.2, 48.7, 35.6, 33.1, 16.6, 1.7. IR (Acetone)  $\nu$  927, 989, 1165, 1260, 1323, 1446, 2961  $\text{cm}^{-1}$ . HRMS (ESI) calcd. for  $\text{C}_{11}\text{H}_{15}\text{I}_3\text{N}$  (M+H): 541.8333, Found: 541.8342.

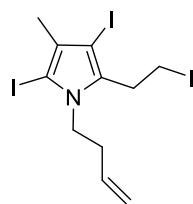

<sup>1</sup>H NMR (CDCl<sub>3</sub>, 600 MHz, TMS)

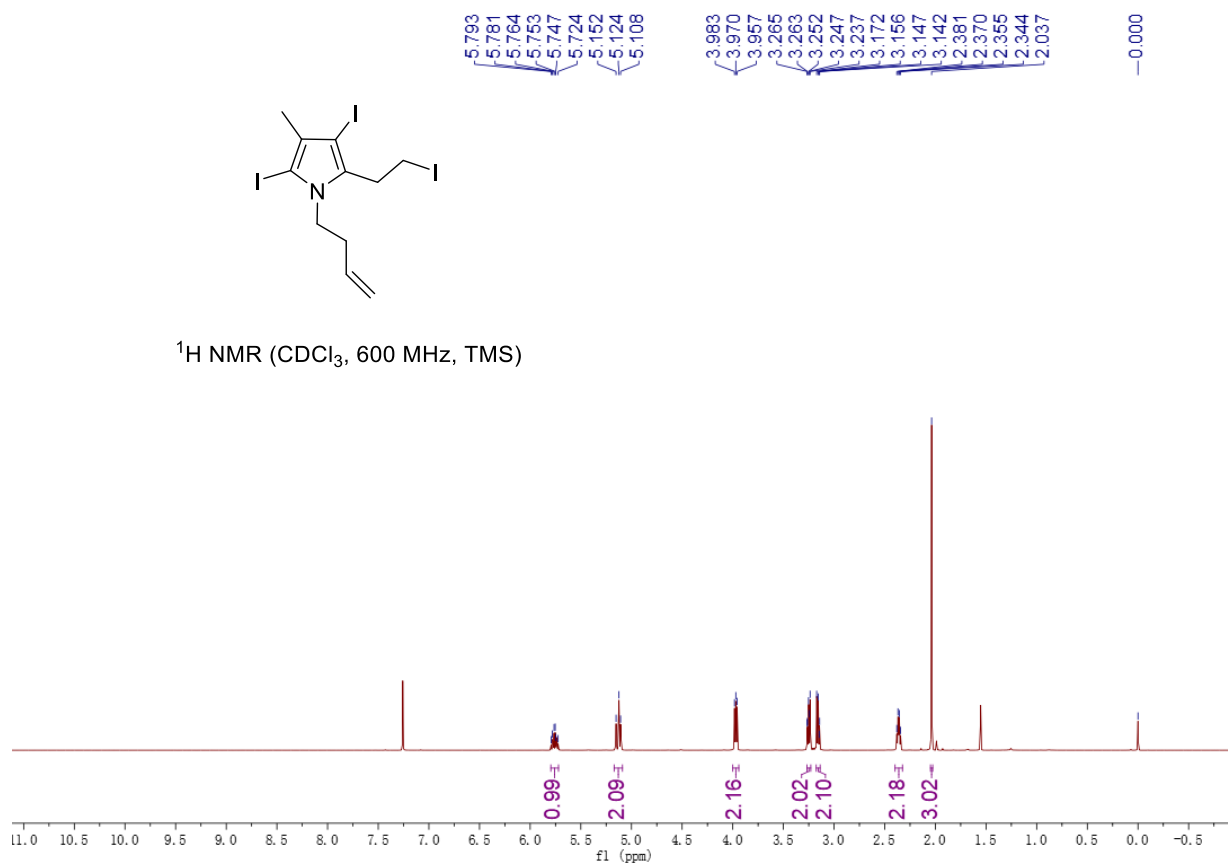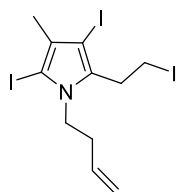

<sup>13</sup>C NMR (CDCl<sub>3</sub>, 100 MHz, TMS)

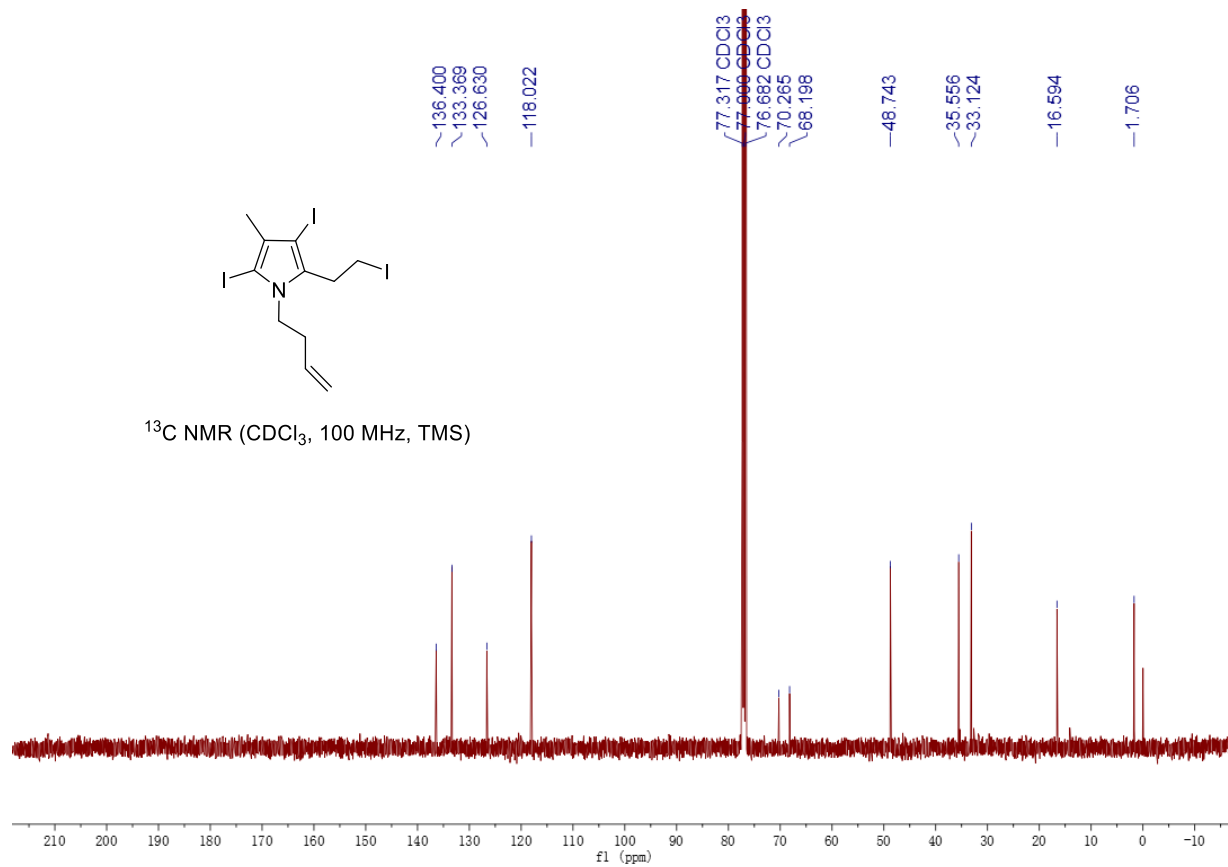

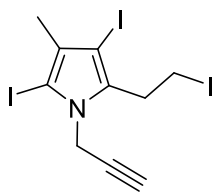

**2,4-diiodo-5-(2-iodoethyl)-3-methyl-1-(prop-2-yn-1-yl)-1H-pyrrole (3ha)**

A colorless oil, 44.6 mg, 85% yield.  $^1\text{H}$  NMR ( $\text{CDCl}_3$ , TMS, 400 MHz)  $\delta$  4.75 (d,  $J = 2.5$  Hz, 2H), 3.38 - 3.30 (m, 2H), 3.29 - 3.20 (m, 2H), 2.40 (t,  $J = 2.5$  Hz, 1H), 2.05 (s, 3H).  $^{13}\text{C}$  NMR ( $\text{CDCl}_3$ , TMS, 100 MHz)  $\delta$  136.7, 127.3, 77.8, 73.7, 70.8, 69.5, 39.2, 33.2, 16.7, 1.5. IR (Neat)  $\nu$  675, 734, 946, 1174, 1325, 1378, 1442, 2919, 3281  $\text{cm}^{-1}$ . HRMS (EI) calcd. for  $\text{C}_{10}\text{H}_{10}\text{I}_3\text{N}$ : 524.7960, Found: 524.7942.

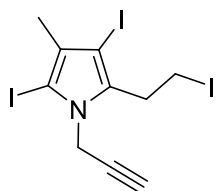

$^1\text{H}$  NMR ( $\text{CDCl}_3$ , 400 MHz, TMS)

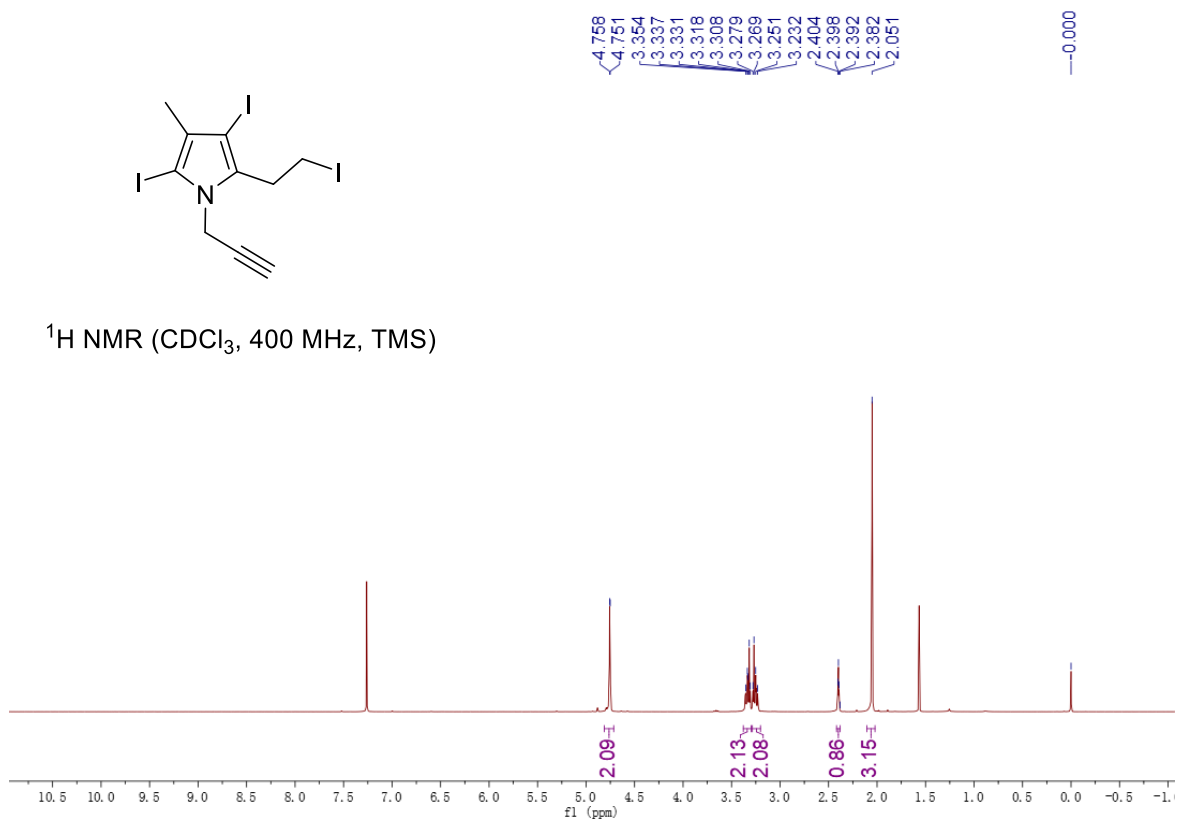

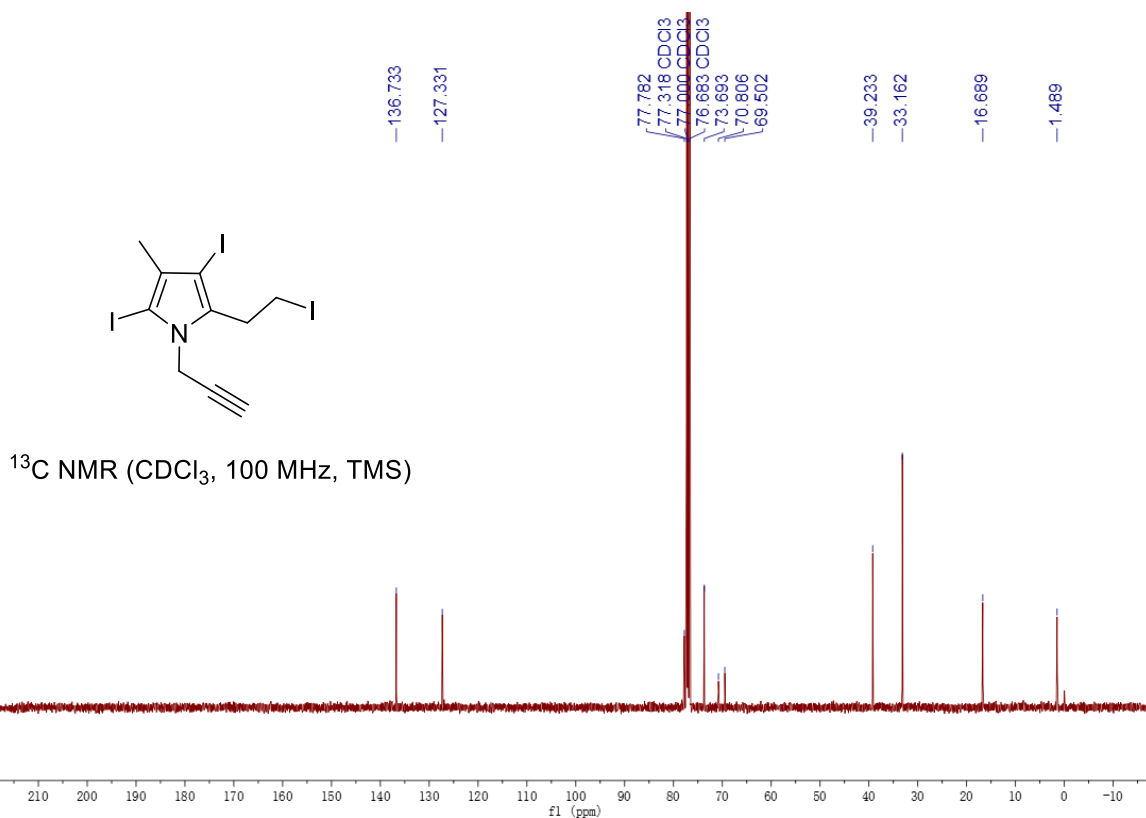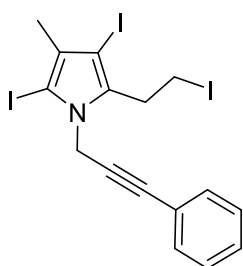

**2,4-diiodo-5-(2-iodoethyl)-3-methyl-1-(3-phenylprop-2-yn-1-yl)-1H-pyrrole (3ia)**

A colorless oil, 49.3 mg, 82% yield. <sup>1</sup>H NMR (CDCl<sub>3</sub>, TMS, 600 MHz) δ 7.43 (d, *J* = 8.3 Hz, 2H), 7.36-7.26 (m, 3H), 4.96 (s, 2H), 3.44 - 3.36 (m, 2H), 3.35 - 3.27 (m, 2H), 2.06 (s, 3H). <sup>13</sup>C NMR (CDCl<sub>3</sub>, TMS, 150 MHz) δ 136.8, 131.9, 128.8, 128.3, 127.1, 121.9, 85.3, 83.0, 70.9, 69.3, 40.1, 33.3, 16.7, 1.6. IR (Neat) ν 696, 735, 792, 1028, 1172, 1261, 1327, 1380, 1490, 2922 cm<sup>-1</sup>. HRMS (ESI) calcd. for C<sub>16</sub>H<sub>15</sub>I<sub>3</sub>N (M+H): 601.8339, Found: 601.8547.

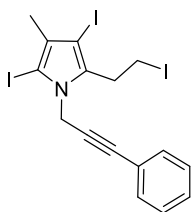

<sup>1</sup>H NMR (CDCl<sub>3</sub>, 600 MHz, TMS)

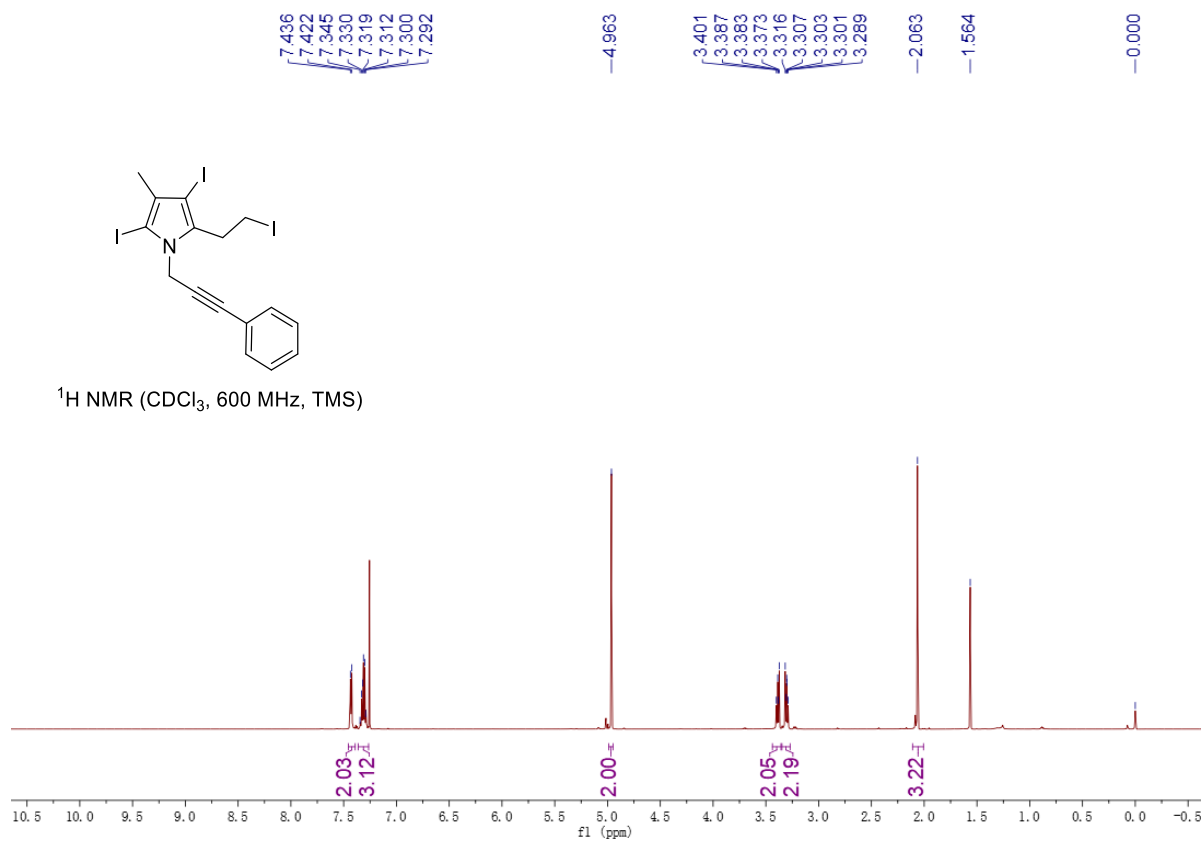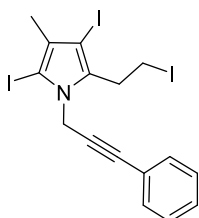

<sup>13</sup>C NMR (CDCl<sub>3</sub>, 150 MHz, TMS)

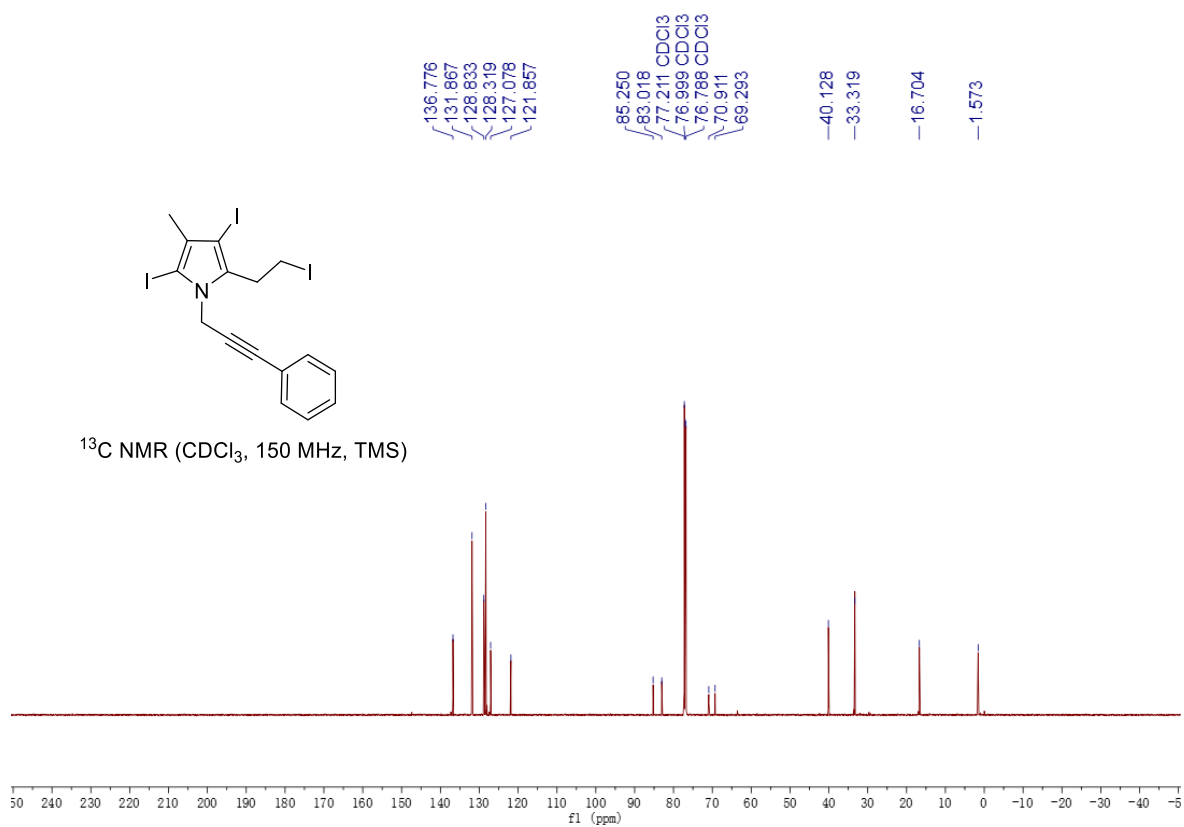

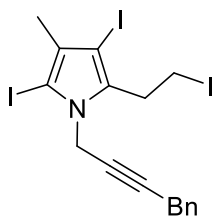

**2,4-diiodo-5-(2-iodoethyl)-3-methyl-1-(4-phenylbut-2-yn-1-yl)-1H-pyrrole (3ja)**

A colorless oil, 51.7 mg, 84% yield.  $^1\text{H}$  NMR ( $\text{CDCl}_3$ , TMS, 600 MHz)  $\delta$  7.36 - 7.28 (m, 4H), 7.27 - 7.22 (m, 1H), 4.78 (t,  $J = 2.3$  Hz, 2H), 3.60 - 3.58 (m, 2H), 3.39 - 3.31 (m, 2H), 3.30 - 3.21 (m, 2H), 2.06 (s, 3H).  $^{13}\text{C}$  NMR ( $\text{CDCl}_3$ , TMS, 150 MHz)  $\delta$  136.7, 135.9, 128.6, 127.9, 127.0, 126.8, 83.6, 76.3, 70.8, 69.1, 39.8, 33.3, 25.1, 16.7, 1.6. IR (Neat)  $\nu$  703, 814, 926, 1062, 1169, 1362, 1723, 2951  $\text{cm}^{-1}$ . HRMS (ESI) calcd. for  $\text{C}_{17}\text{H}_{17}\text{I}_3\text{N}$  ( $\text{M}+\text{H}$ ): 615.8456, Found: 615.9012.

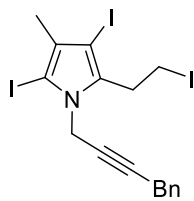

$^1\text{H}$  NMR ( $\text{CDCl}_3$ , 600 MHz, TMS)

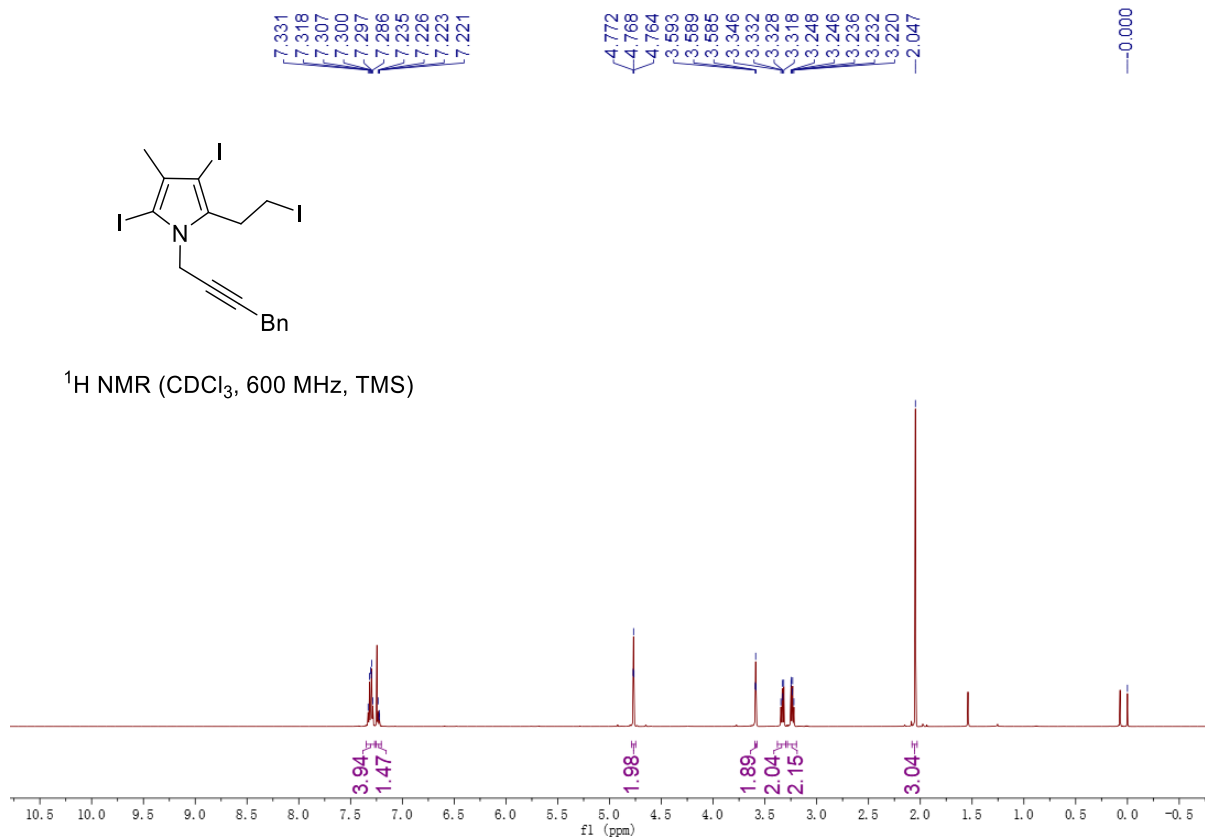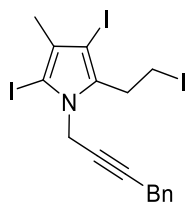

$^{13}\text{C}$  NMR ( $\text{CDCl}_3$ , 150 MHz, TMS)

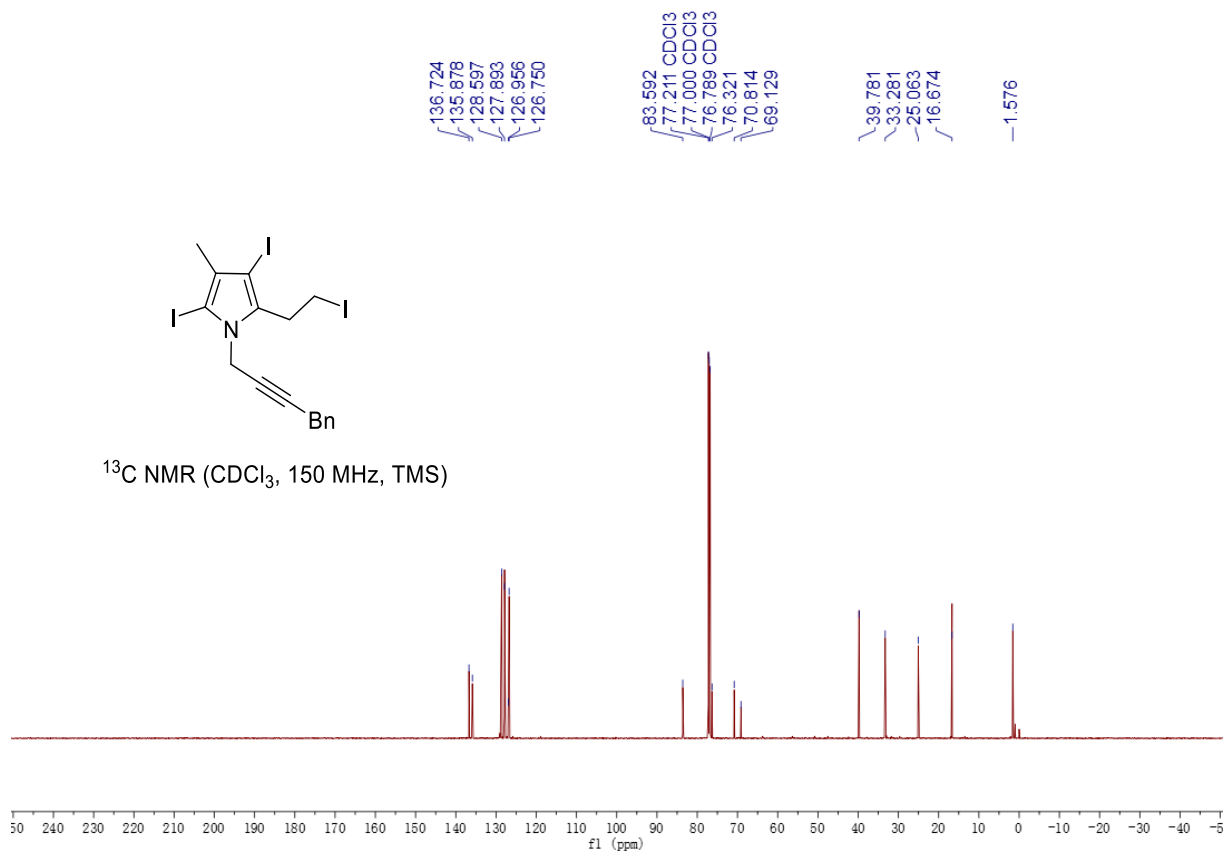

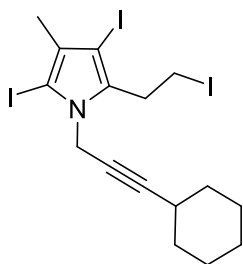

**1-(3-cyclohexylprop-2-yn-1-yl)-2,4-diiodo-5-(2-iodoethyl)-3-methyl-1H-pyrrole (3ka)**

A colorless oil, 50.4 mg, 83% yield.  $^1\text{H}$  NMR ( $\text{CDCl}_3$ , TMS, 400 MHz)  $\delta$  4.71 (d,  $J = 2.1$  Hz, 2H), 3.37 - 3.21 (m, 4H), 2.39 - 2.29 (m, 1H), 2.04 (s, 3H), 1.83 - 1.72 (m, 2H), 1.73 - 1.61 (m, 2H), 1.55 - 1.47 (m, 1H), 1.45 - 1.34 (m, 2H), 1.33 - 1.22 (m, 3H).  $^{13}\text{C}$  NMR ( $\text{CDCl}_3$ , TMS, 100 MHz)  $\delta$  136.7, 126.7, 90.2, 74.1, 70.8, 68.9, 39.8, 33.3, 32.3, 29.0, 25.7, 24.8, 16.7, 1.7. IR (Neat)  $\nu$  721, 1173, 1326, 1442, 2213, 2849, 2919, 2934  $\text{cm}^{-1}$ . HRMS (EI) calcd. for  $\text{C}_{16}\text{H}_{20}\text{I}_3\text{N}$ : 606.8750, Found: 606.8724.

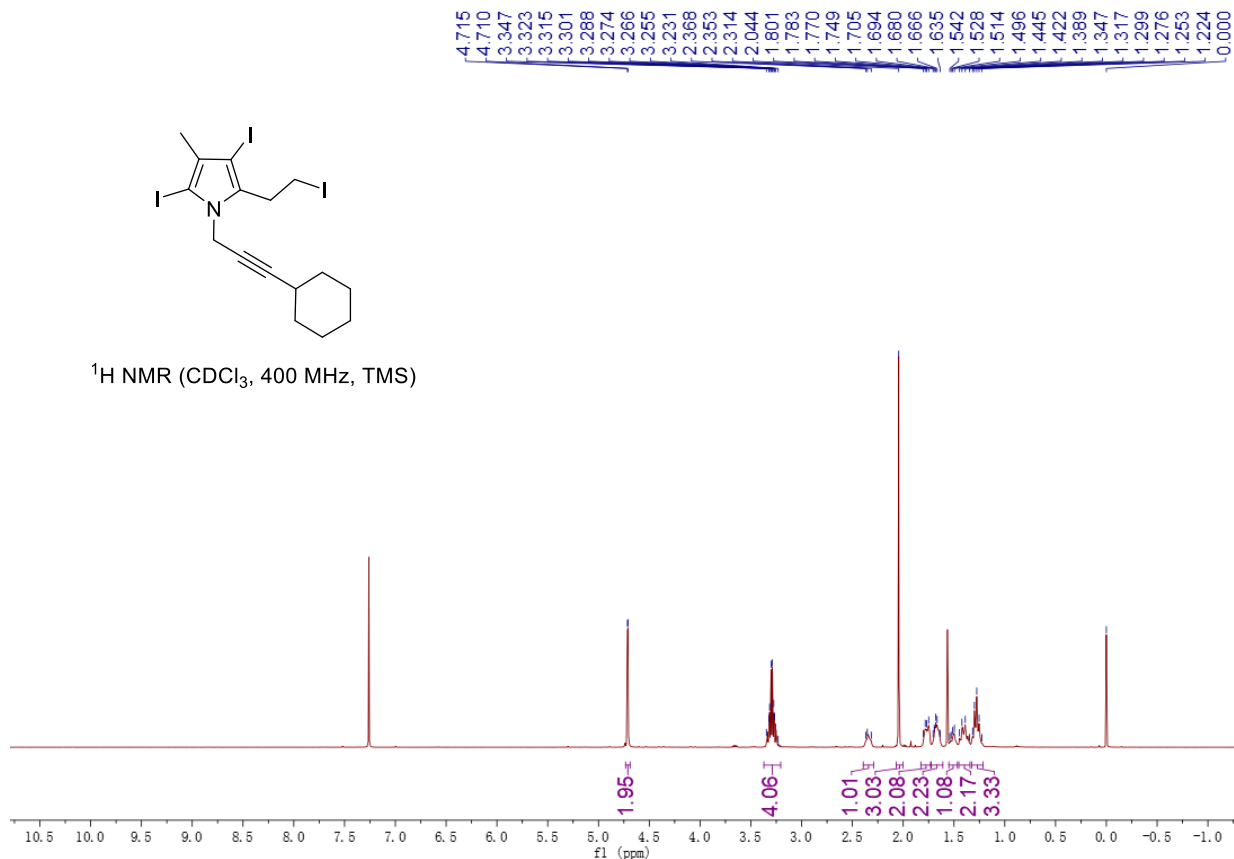



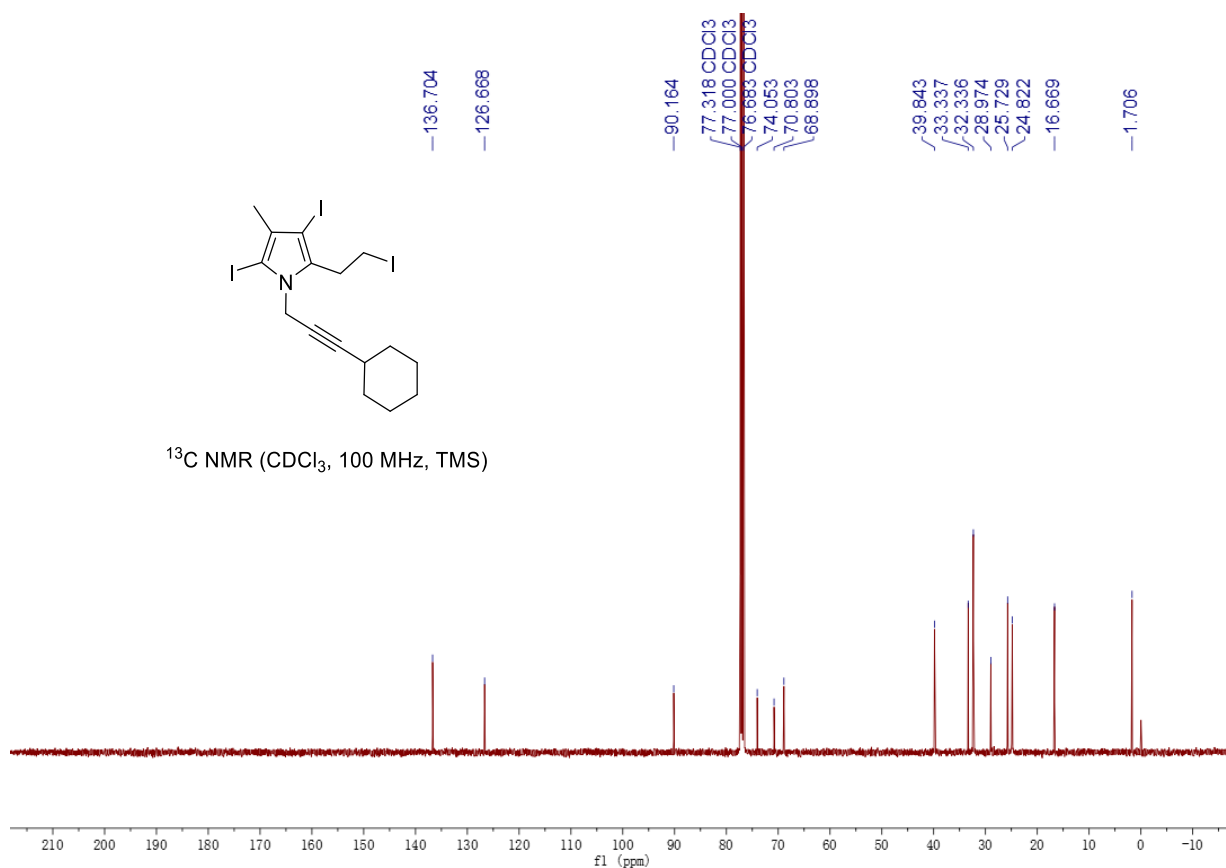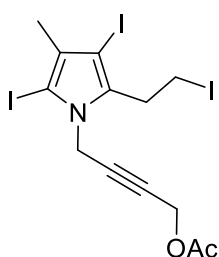

**4-(2,4-diiodo-5-(2-iodoethyl)-3-methyl-1H-pyrrol-1-yl)but-2-yn-1-yl acetate (3la)**

A colorless oil, 54.9 mg, 92% yield. <sup>1</sup>H NMR (CDCl<sub>3</sub>, TMS, 400 MHz) δ 4.79 (t, *J* = 2.0 Hz, 2H), 4.66 (t, *J* = 1.9 Hz, 2H), 3.35 - 3.29 (m, 2H), 3.27 - 3.21 (m, 2H), 2.11 (s, 3H), 2.05 (s, 3H). <sup>13</sup>C NMR (CDCl<sub>3</sub>, TMS, 100 MHz) δ 170.1, 136.7, 127.2, 80.6, 79.4, 70.8, 69.4, 52.0, 39.4, 33.1, 20.8, 16.7, 1.5. IR (Neat) ν 734, 1031, 1171, 1216, 1240, 1327, 1379, 1422, 1729 1742, 2917 cm<sup>-1</sup>. HRMS (ESI) calcd. for C<sub>13</sub>H<sub>15</sub>NO<sub>2</sub>I<sub>3</sub> (M+H): 597.8231, Found: 597.8246.

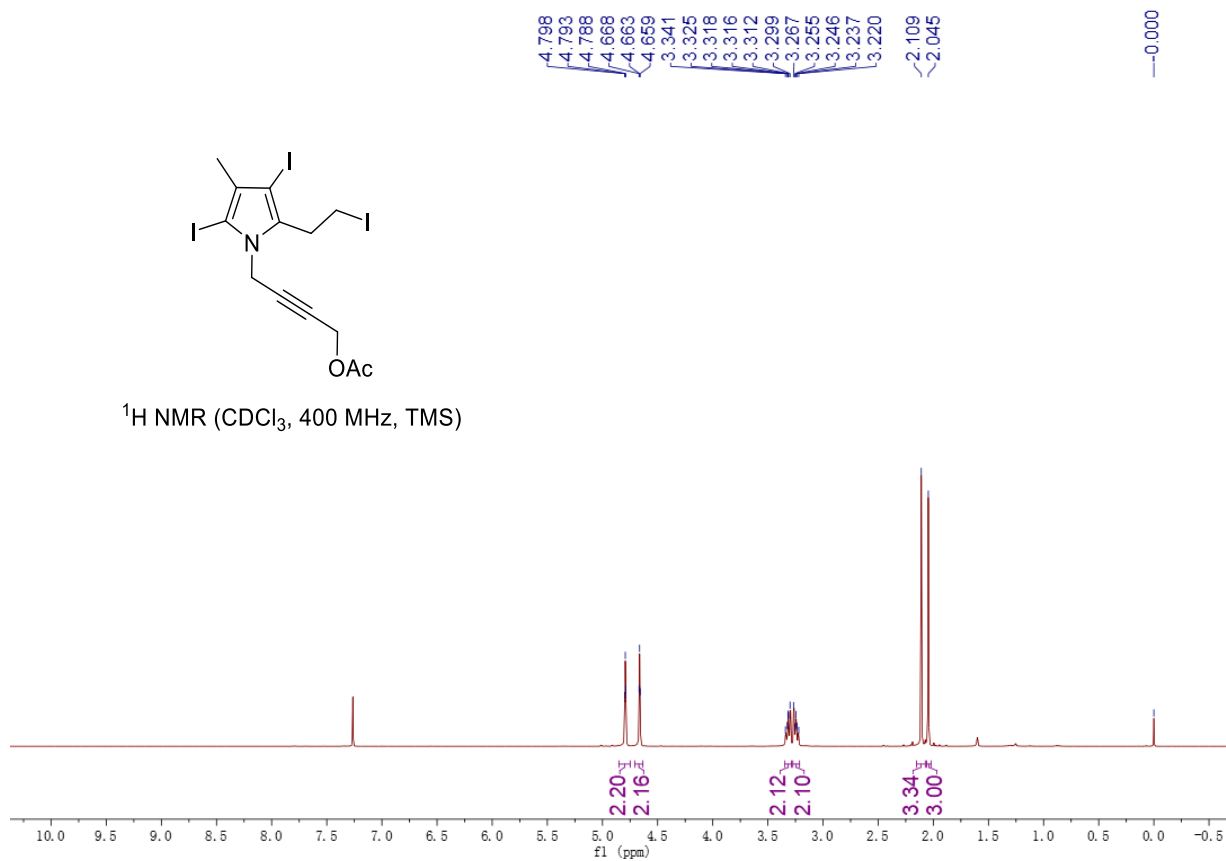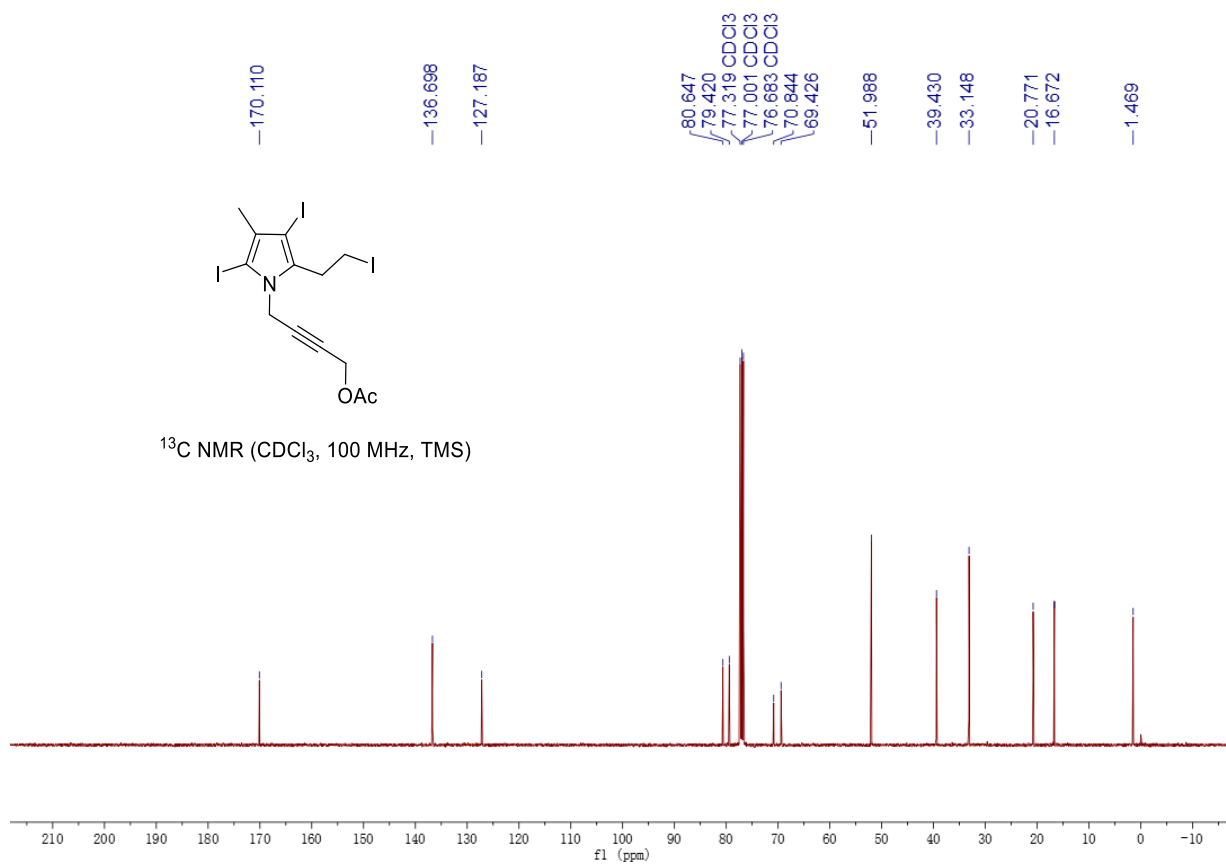

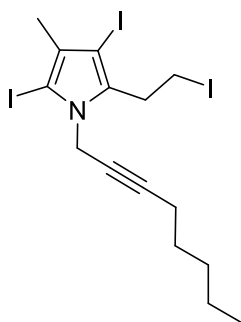

### 2,4-diiodo-5-(2-iodoethyl)-3-methyl-1-(oct-2-yn-1-yl)-1H-pyrrole (3ma)

A colorless oil, 50.6 mg, 85% yield.  $^1\text{H}$  NMR ( $\text{CDCl}_3$ , TMS, 600 MHz)  $\delta$  4.70 (t,  $J = 2.3$  Hz, 2H), 3.34 - 3.29 (m, 2H), 3.29 - 3.24 (m, 2H), 2.18 - 2.14 (m, 2H), 2.04 (s, 3H), 1.53 - 1.45 (m, 2H), 1.36 - 1.28 (m, 4H), 0.89 (t,  $J = 7.1$  Hz, 3H).  $^{13}\text{C}$  NMR ( $\text{CDCl}_3$ , TMS, 150 MHz)  $\delta$  136.7, 126.8, 86.3, 74.1, 70.8, 69.0, 39.8, 33.3, 31.0, 28.0, 22.2, 18.7, 16.7, 14.0, 1.6. IR (Neat)  $\nu$  716, 896, 965, 1020, 1066, 1104, 1180, 1325, 1406, 1445, 2920  $\text{cm}^{-1}$ . HRMS (ESI) calcd. for  $\text{C}_{15}\text{H}_{21}\text{I}_3\text{N}$  ( $\text{M}+\text{H}$ ): 595.8739, Found: 595.8846.

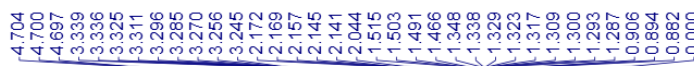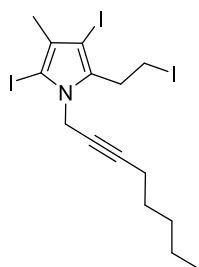

$^1\text{H}$  NMR ( $\text{CDCl}_3$ , 600 MHz, TMS)

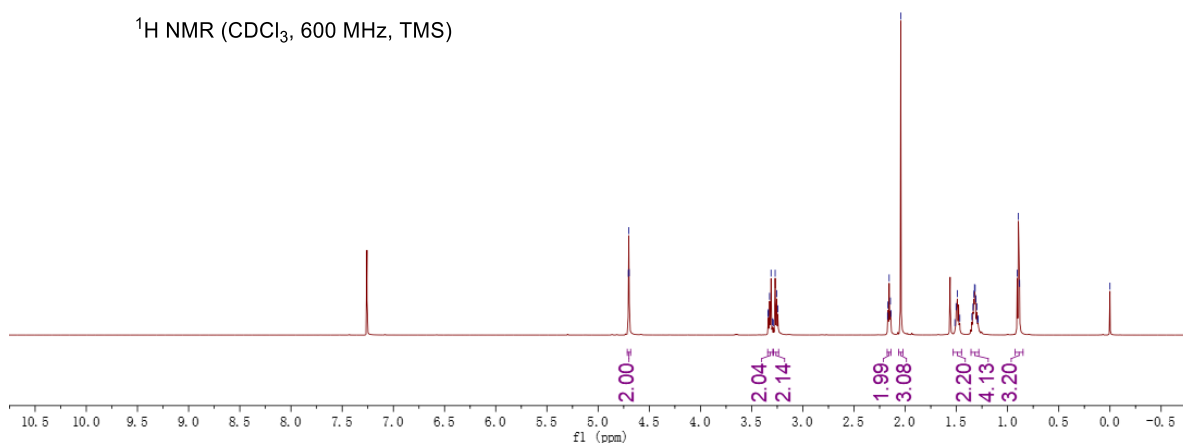

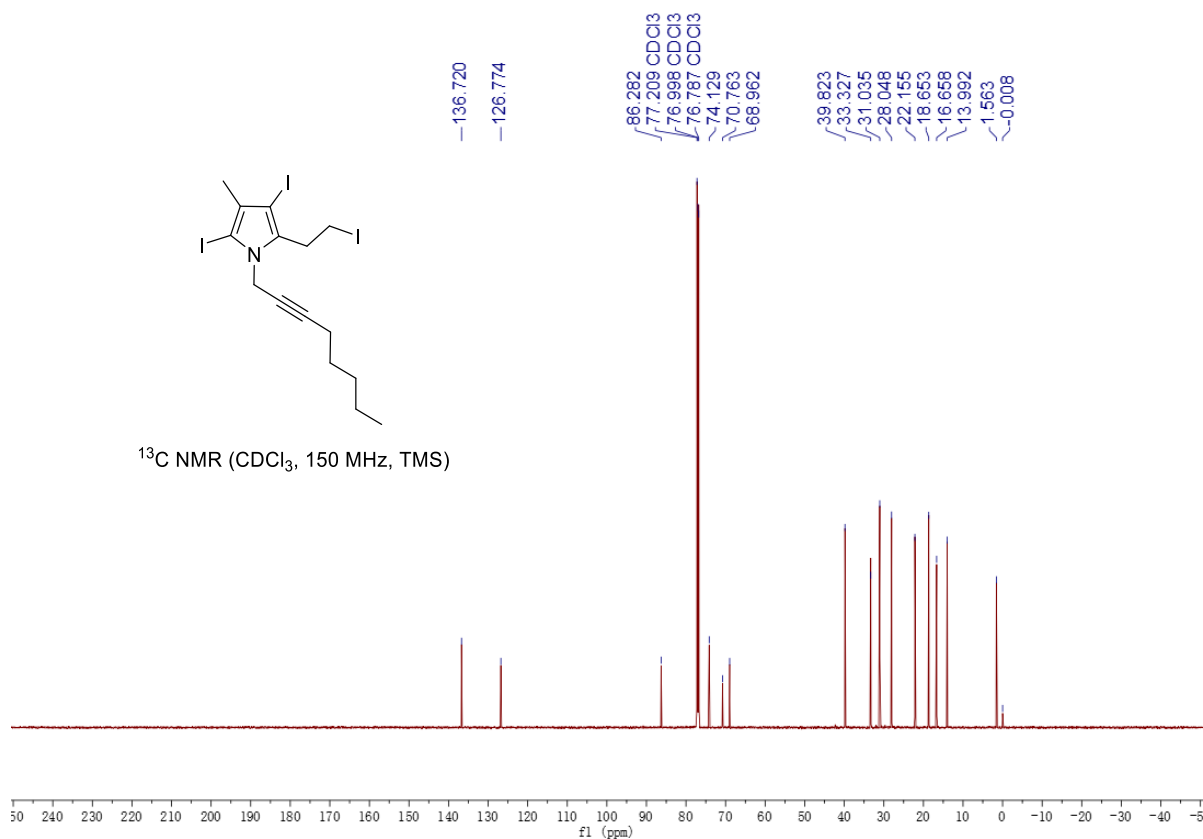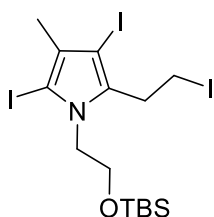

**1-(2-((tert-butyldimethylsilyl)oxy)ethyl)-2,4-diiodo-5-(2-iodoethyl)-3-methyl-1H-pyrrole (3na)**

A colorless oil, 48.4 mg, 75% yield. <sup>1</sup>H NMR (CDCl<sub>3</sub>, TMS, 400 MHz) δ 4.06 (t, *J* = 5.8 Hz, 2H), 3.75 (t, *J* = 5.8 Hz, 2H), 3.38 - 3.29 (m, 2H), 3.20 - 3.11 (m, 2H), 2.03 (s, 3H), 0.84 (s, 9H), -0.05 (s, 6H). <sup>13</sup>C NMR (CDCl<sub>3</sub>, TMS, 100 MHz) δ 137.8, 126.7, 69.8, 68.1, 62.6, 51.0, 33.0, 25.8, 18.3, 16.6, 1.9, -5.6. IR (Acetone) ν 725, 1027, 1171, 1183, 1306, 1329, 1439, 1705, 2927 cm<sup>-1</sup>. HRMS (ESI) calcd. for C<sub>15</sub>H<sub>27</sub>NOI<sub>3</sub>Si (M+H): 645.8997, Found: 645.8996.

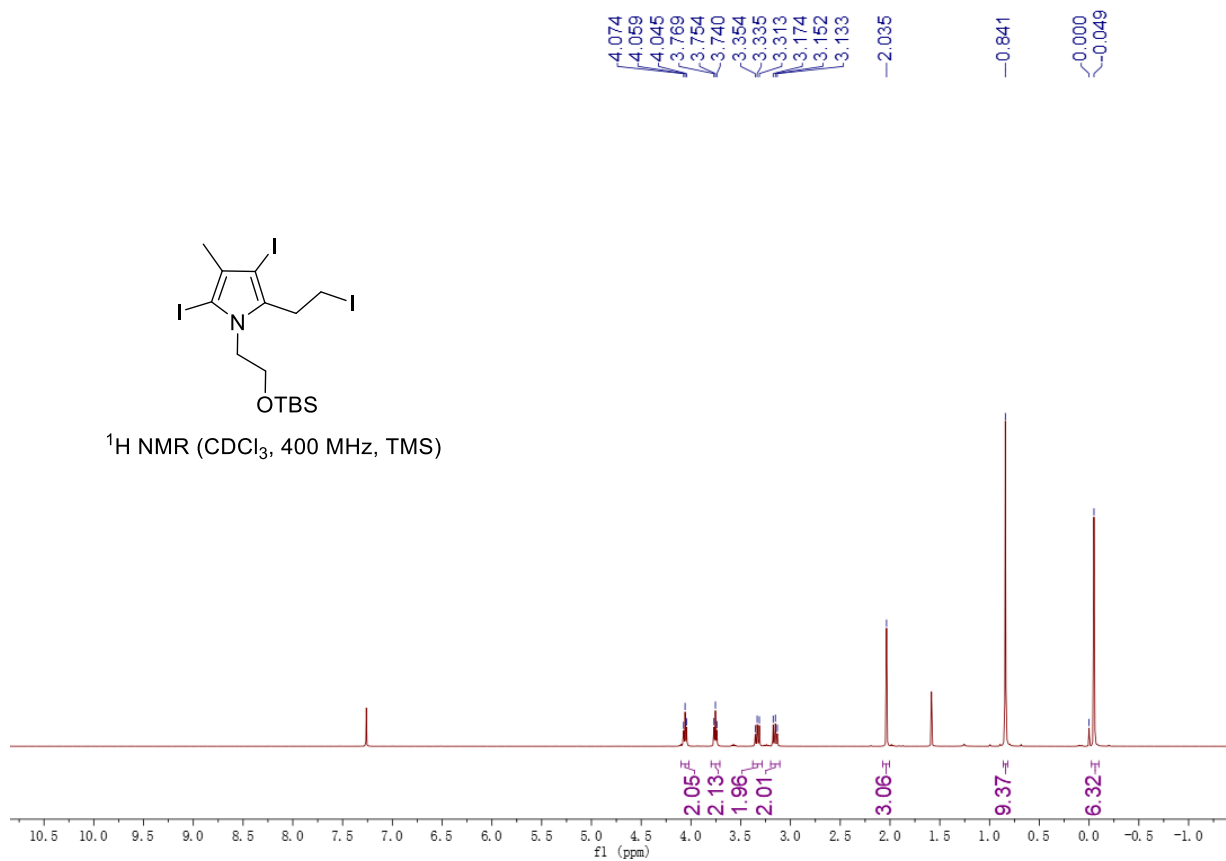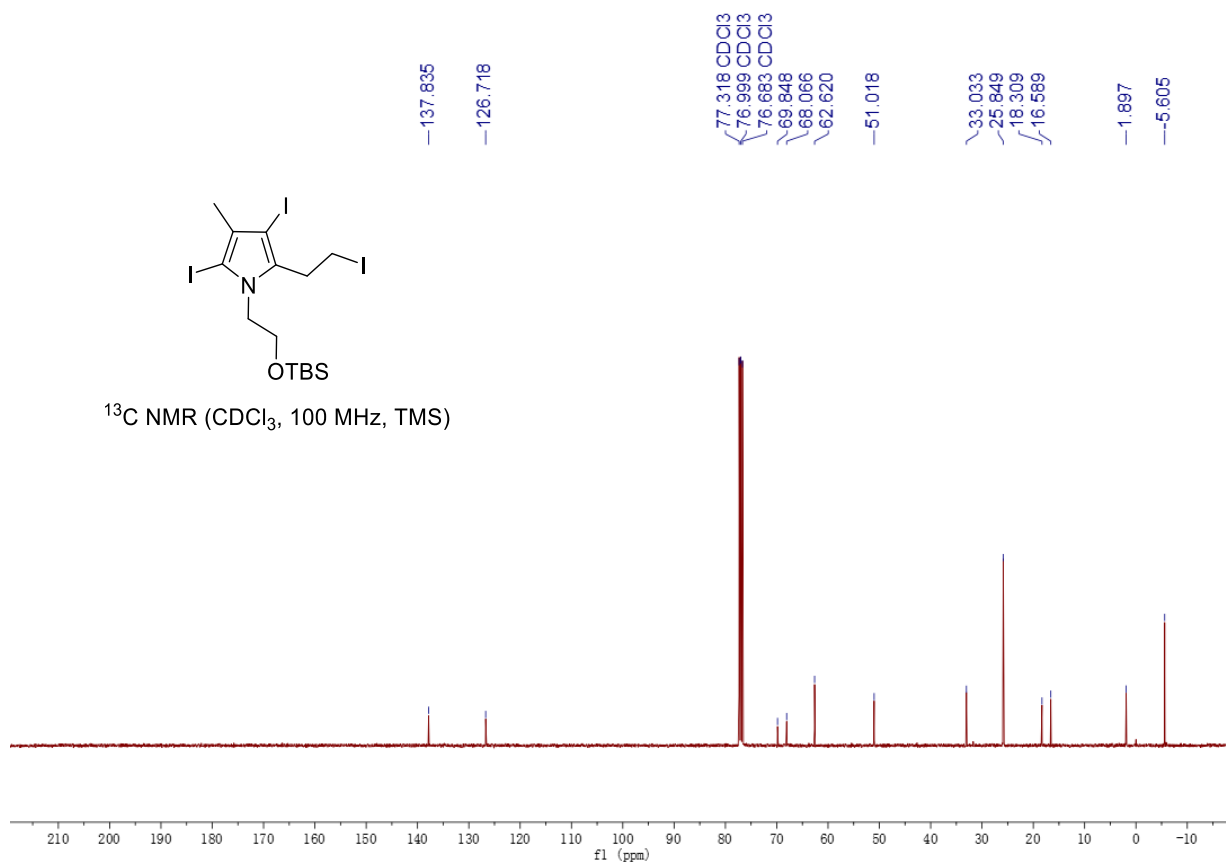

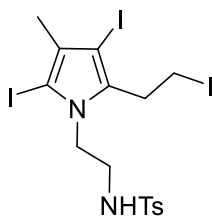

**N-(2-(2,4-diiodo-5-(2-iodoethyl)-3-methyl-1H-pyrrol-1-yl)ethyl)-4-methylbenzenesulfonamide (30a)**

A colorless oil, 36.3 mg, 53% yield.  $^1\text{H}$  NMR ( $\text{CDCl}_3$ , TMS, 400 MHz)  $\delta$  7.71 (d,  $J = 8.0$  Hz, 2H), 7.31 (d,  $J = 8.0$  Hz, 2H), 4.60 (t,  $J = 6.6$  Hz, 1H), 4.11 (t,  $J = 6.8$  Hz, 2H), 3.31 - 3.22 (m, 2H), 3.19 - 3.12 (m, 4H), 2.44 (s, 3H), 1.99 (s, 3H).  $^{13}\text{C}$  NMR ( $\text{CDCl}_3$ , TMS, 100 MHz)  $\delta$  143.9, 136.9, 136.5, 129.9, 127.4, 127.1, 69.9, 69.1, 48.7, 43.2, 32.5, 21.6, 16.6, 1.7. IR (Neat)  $\nu$  758, 806, 1027, 1090, 1146, 1326, 1433, 1462, 1603, 3300  $\text{cm}^{-1}$ . HRMS (ESI) calcd. for  $\text{C}_{16}\text{H}_{19}\text{N}_2\text{O}_2\text{NaSI}_3$  ( $\text{M}+\text{Na}$ ): 706.8194, Found: 706.8189.

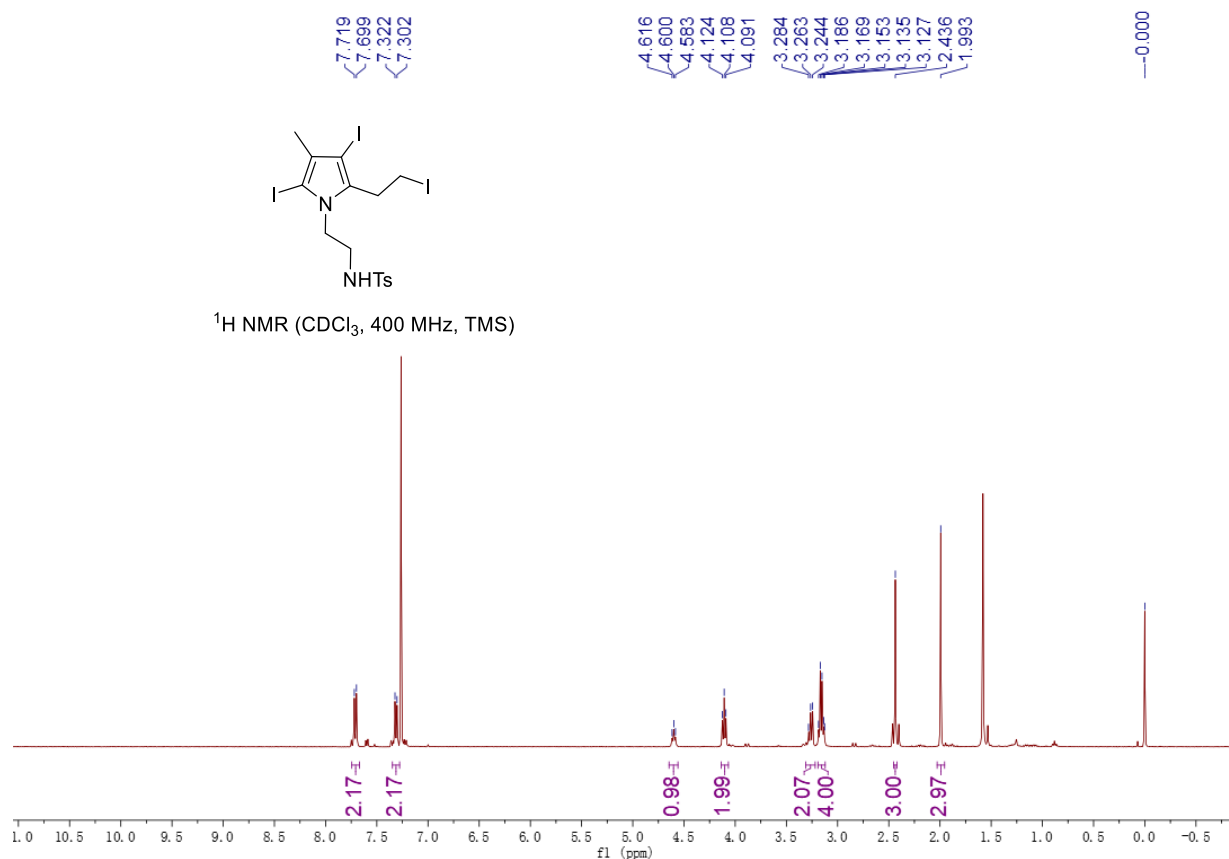

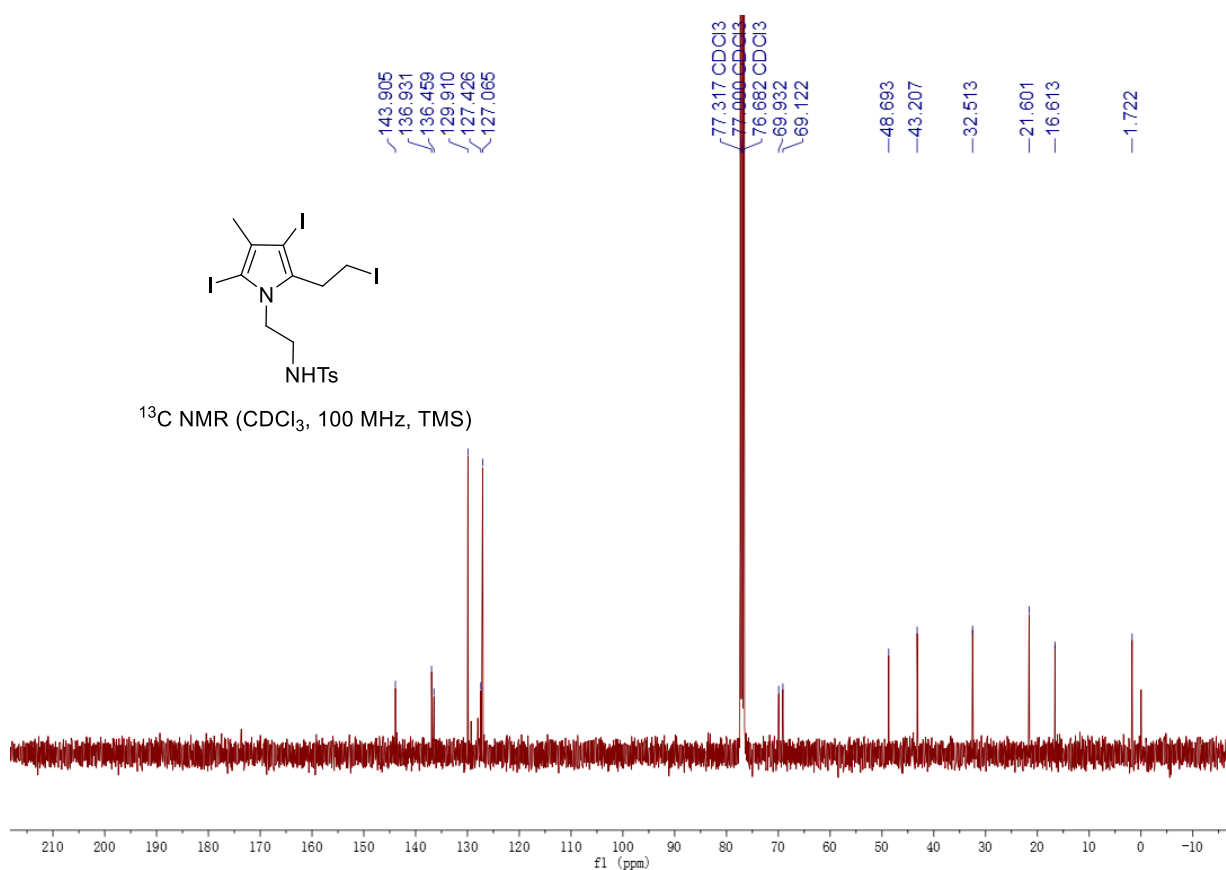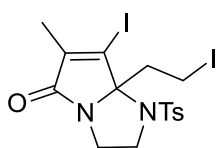

**7-iodo-7a-(2-iodoethyl)-6-methyl-1-tosyl-1,2,3,7a-tetrahydro-5H-pyrrolo[1,2-a]imidazol-5-one (30a')**

A colorless oil, 25.7 mg, 45% yield. <sup>1</sup>H NMR (CDCl<sub>3</sub>, TMS, 400 MHz) δ 7.71 (d, *J* = 8.4 Hz, 2H), 7.31 (d, *J* = 8.0 Hz, 2H), 4.06 - 4.01 (m, 1H), 3.71 - 3.66 (m, 1H), 3.41 - 3.33 (m, 1H), 3.28 - 3.21 (m, 1H), 3.17 - 3.09 (m, 1H), 2.95 - 2.81 (m, 2H), 2.67 - 2.56 (m, 1H), 2.43 (s, 3H), 1.88 (s, 3H). <sup>13</sup>C NMR (CDCl<sub>3</sub>, TMS, 100 MHz) δ 173.4, 163.0, 146.1, 144.3, 136.8, 129.8, 127.4, 115.9, 90.1, 77.3, 41.4, 21.6, 14.5, -5.7. IR (Neat) ν 2957, 1610, 1553, 1329, 1240, 809, 773 cm<sup>-1</sup>. HRMS (ESI) calcd. for C<sub>16</sub>H<sub>19</sub>N<sub>2</sub>O<sub>3</sub>NaSI<sub>2</sub> (M+H): 594.9197, Found: 594.9200.

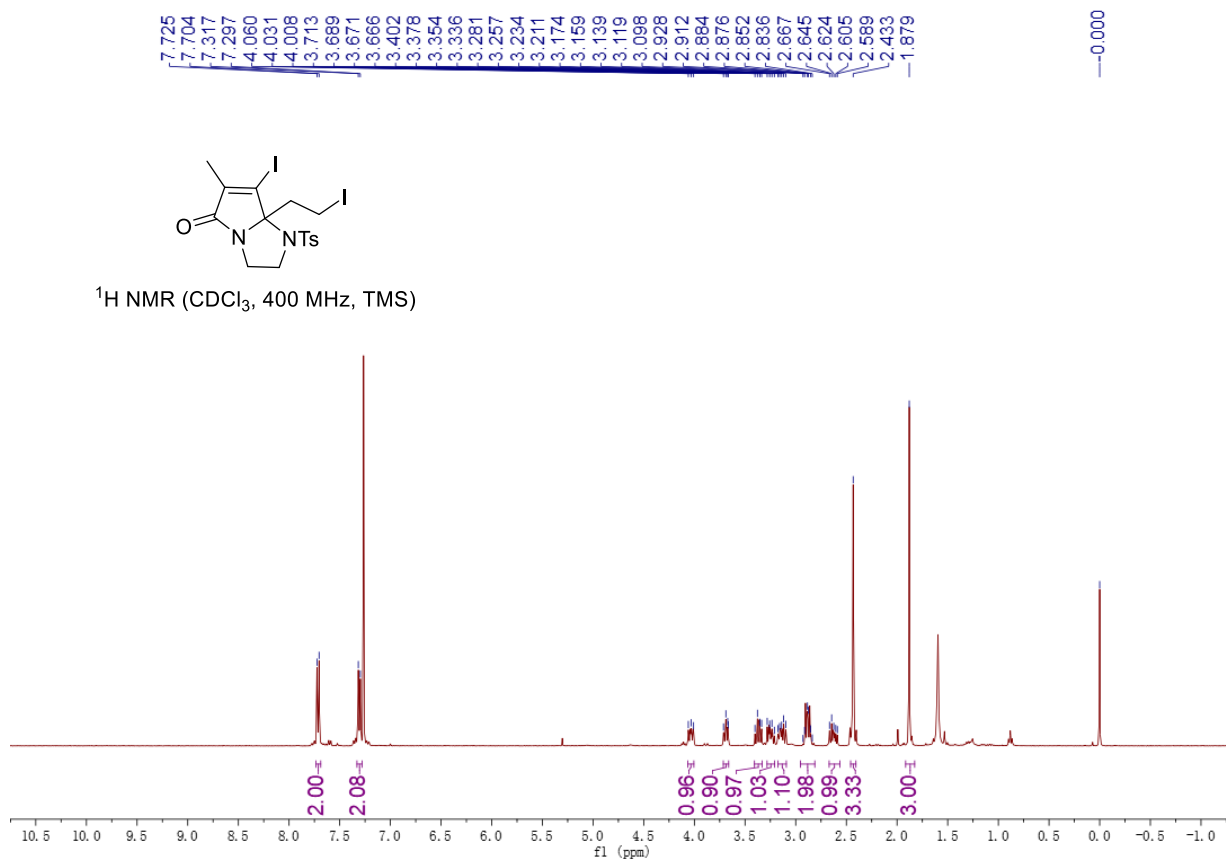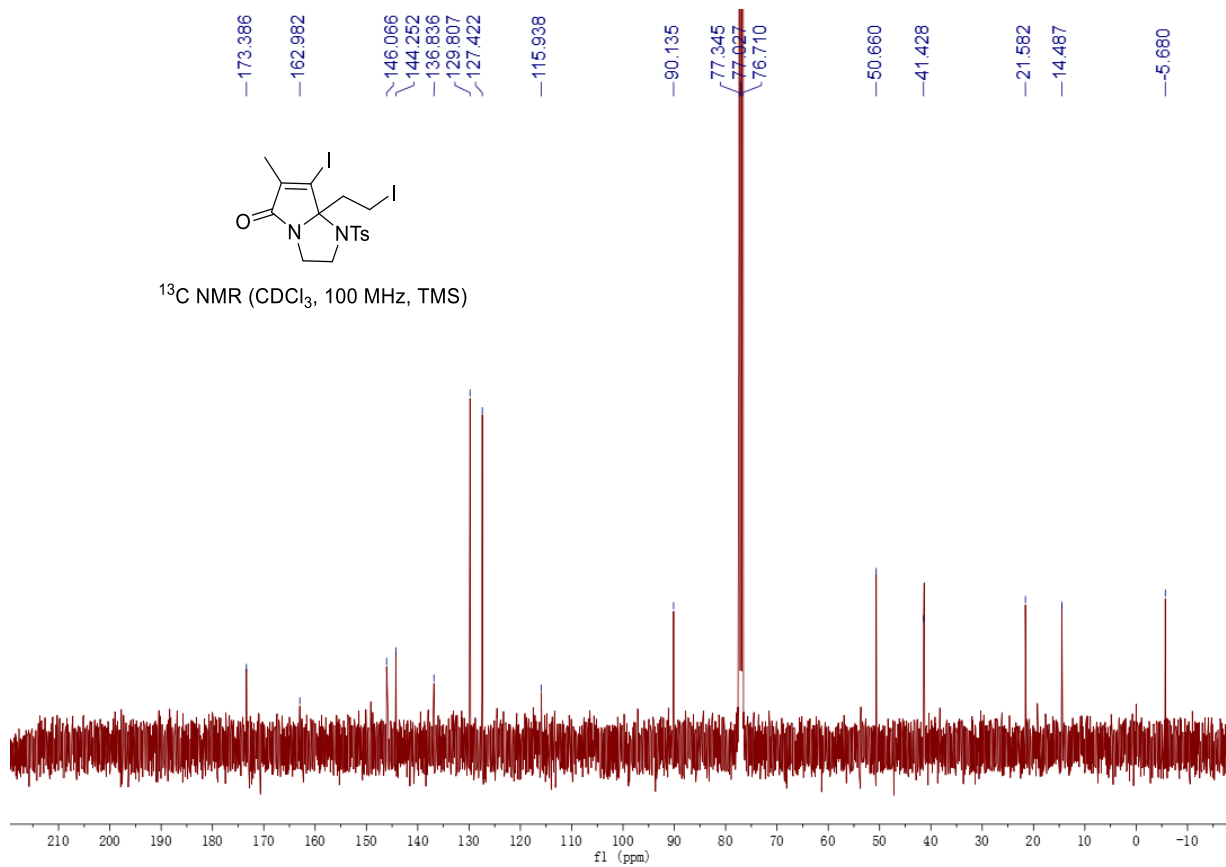



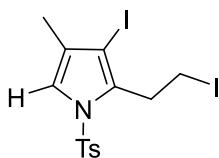

### 2,4-diiodo-5-(2-iodoethyl)-3-methyl-1-tosyl-1H-pyrrole (3pa)

A colorless oil, 38.5 mg, 60% yield.  $^1\text{H}$  NMR ( $\text{CDCl}_3$ , TMS, 600 MHz)  $\delta$  7.67 (d,  $J = 8.4$  Hz, 2H), 7.33 (d,  $J = 8.0$  Hz, 2H), 7.17 (s, 1H), 3.31 - 3.23 (m, 2H), 3.16 - 3.06 (m, 2H), 2.43 (s, 3H), 1.97 (s, 3H).  $^{13}\text{C}$  NMR ( $\text{CDCl}_3$ , TMS, 150 MHz)  $\delta$  145.4, 135.7, 134.2, 130.3, 126.8, 125.0, 119.2, 80.2, 33.1, 21.7, 13.7, 1.2. IR (Acetone)  $\nu$  735, 792, 1172, 1327, 1380, 2207, 2922  $\text{cm}^{-1}$ . HRMS (ESI) calcd. for  $\text{C}_{14}\text{H}_{15}\text{NO}_2\text{NaSI}_2$  ( $\text{M}+\text{Na}$ ): 537.8913, Found: 537.8903.

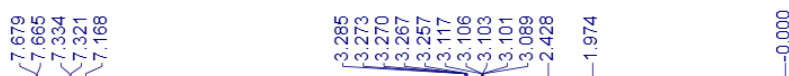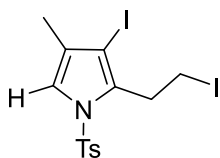

$^1\text{H}$  NMR ( $\text{CDCl}_3$ , 600 MHz, TMS)

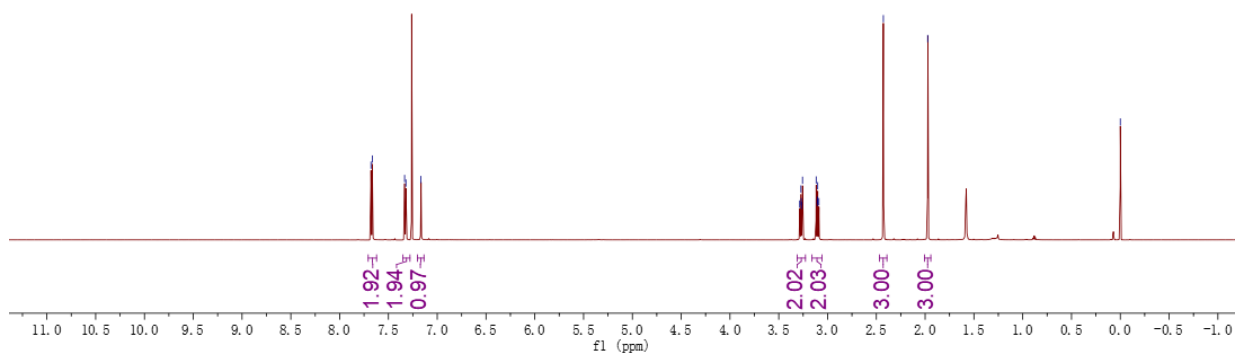

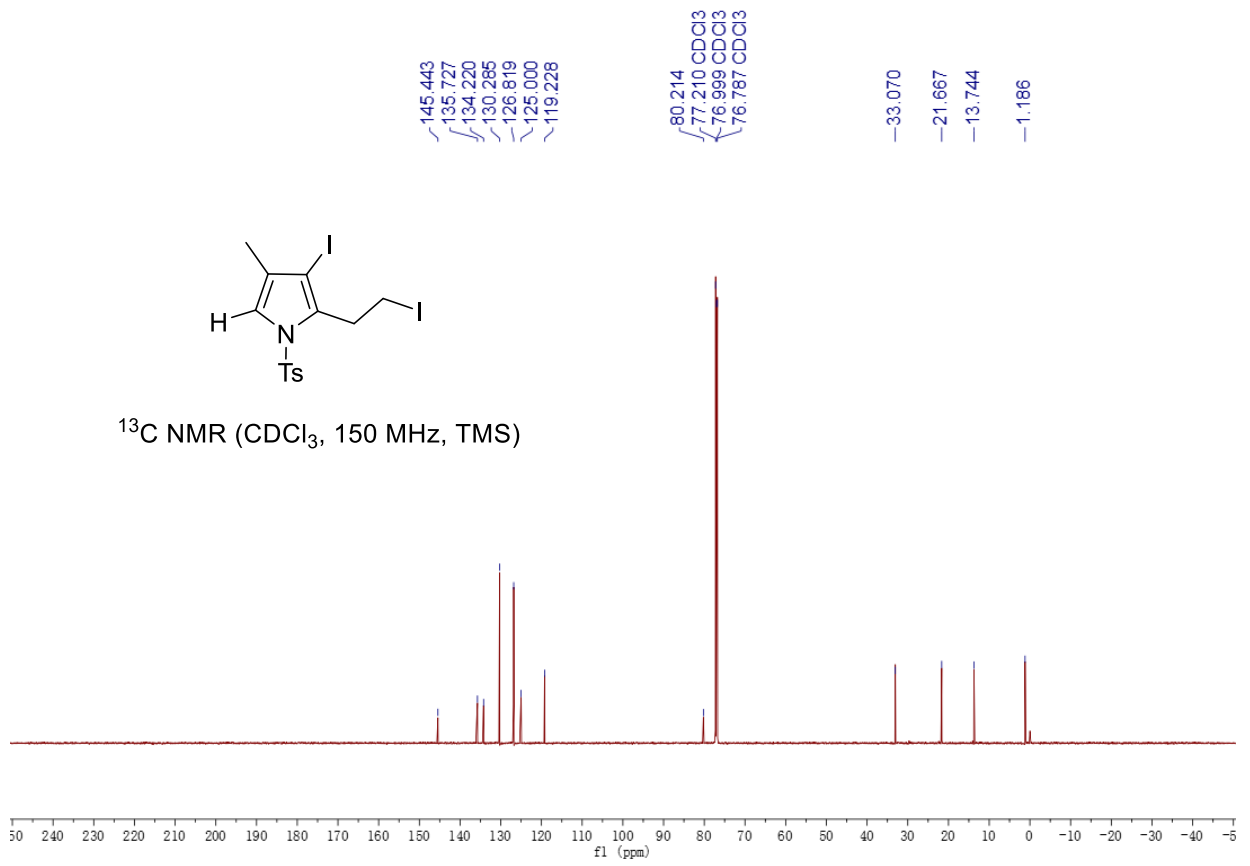

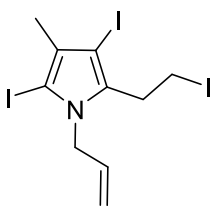

**1-allyl-2,4-diiodo-5-(2-iodoethyl)-3-methyl-1H-pyrrole (3ra)**

A colorless oil, 49.0 mg, 93% yield.  $^1\text{H}$  NMR ( $\text{CDCl}_3$ , TMS, 600 MHz)  $\delta$  5.89 - 5.79 (m, 1H), 5.19 (d,  $J = 10.5$  Hz, 1H), 4.81 (d,  $J = 17.1$  Hz, 1H), 4.60 - 4.57 (m, 2H), 3.23 - 3.19 (m, 2H), 3.16 - 3.12 (m, 2H), 2.06 (s, 3H).  $^{13}\text{C}$  NMR ( $\text{CDCl}_3$ , TMS, 150 MHz)  $\delta$  136.8, 133.2, 126.6, 117.0, 71.1, 68.5, 51.4, 33.1, 16.7, 1.9. IR (Neat)  $\nu$  927, 989, 1165, 1260, 1323, 1446, 2961  $\text{cm}^{-1}$ . HRMS (EI) calcd. for  $\text{C}_{10}\text{H}_{12}\text{NI}_3$ : 526.8111, Found: 526.8098.

5.868  
5.863  
5.844  
5.840  
5.832  
5.825  
5.815  
5.808  
5.201  
5.184  
4.823  
4.795  
4.591  
4.587  
4.580  
4.577  
3.230  
3.227  
3.217  
3.211  
3.200  
3.149  
3.140  
3.135  
3.124  
3.121  
2.055  
-0.000

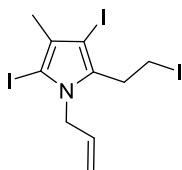

$^1\text{H}$  NMR ( $\text{CDCl}_3$ , 600 MHz, TMS)

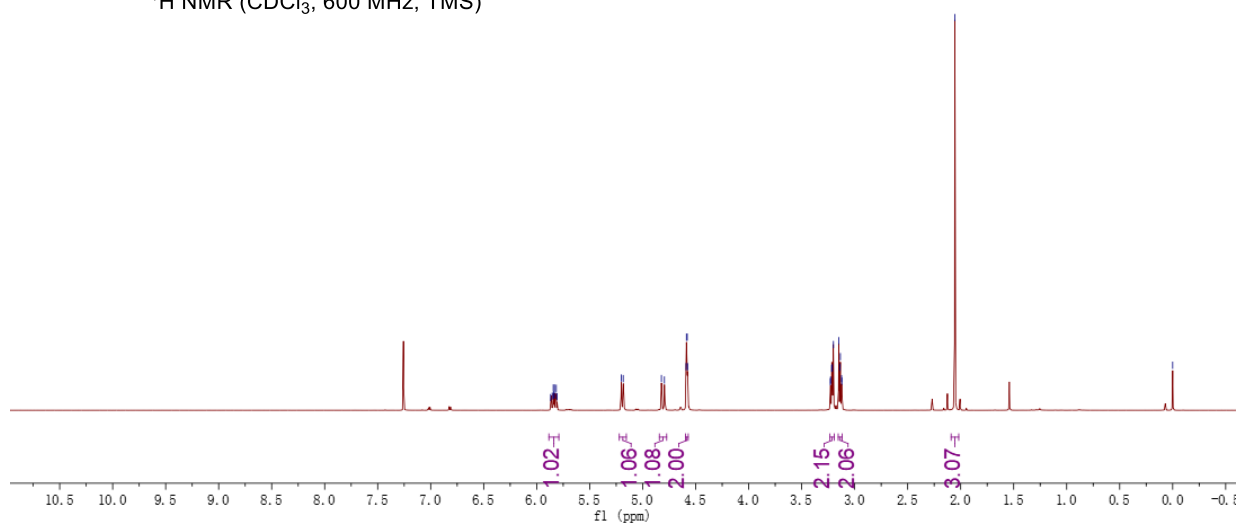

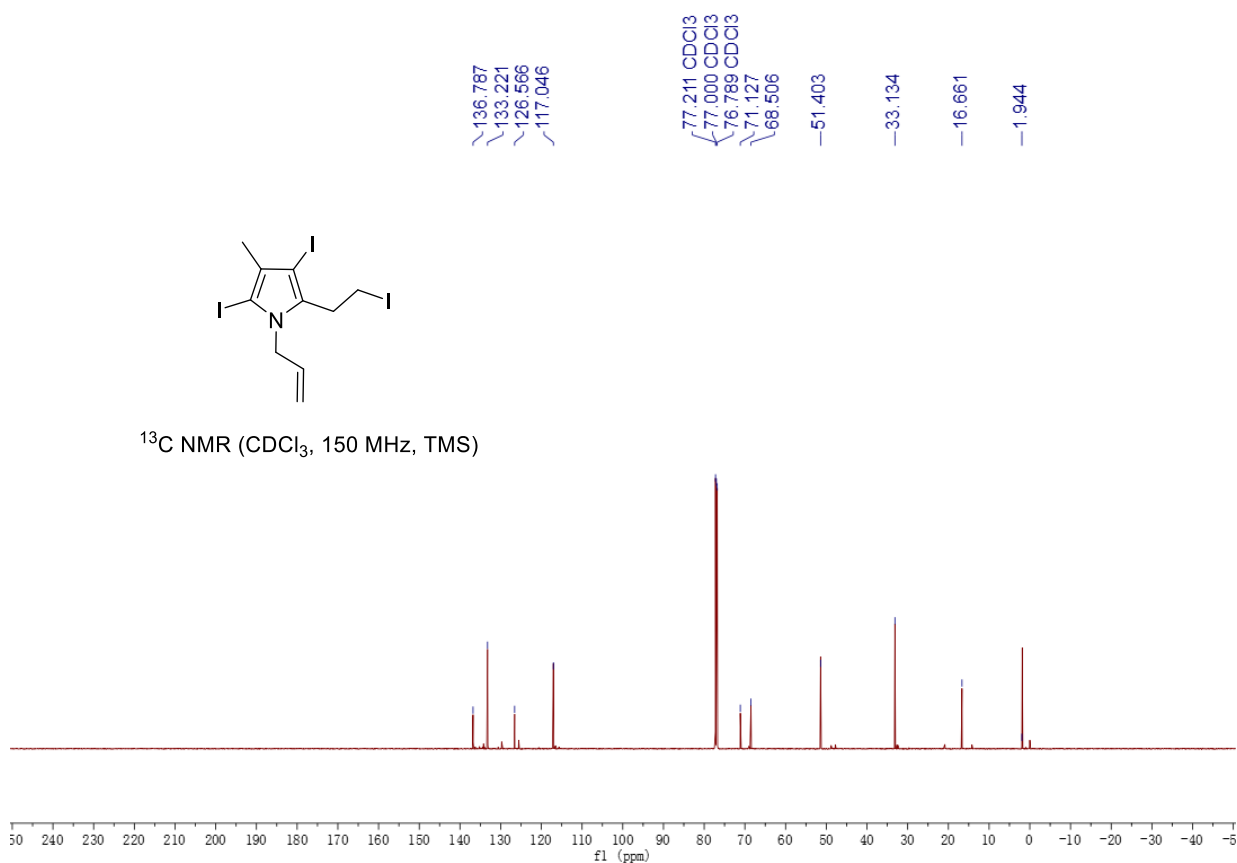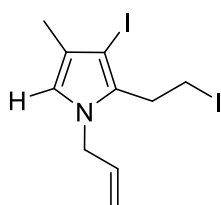

**1-allyl-2,4-diiodo-5-(2-iodoethyl)-3-methyl-1H-pyrrole (3ra')**

A colorless oil, 49.0 mg, 38% yield. <sup>1</sup>H NMR (CDCl<sub>3</sub>, TMS, 400 MHz) δ 6.49 (s, 1H), 5.94 - 5.85 (m, 1H), 5.20 (d, *J* = 10.3 Hz, 1H), 5.01 (d, *J* = 17.1 Hz, 1H), 4.48 - 4.43 (m, 2H), 3.20 - 3.12 (m, 4H), 1.99 (s, 3H). <sup>13</sup>C NMR (CDCl<sub>3</sub>, TMS, 100 MHz) δ 134.1, 132.5, 119.1, 117.3, 110.0, 69.0, 50.2, 31.6, 13.5, 2.4. IR (Neat) ν 2966, 1450, 1337, 1168, 1089, 989 cm<sup>-1</sup>. HRMS (EI) calcd. for C<sub>10</sub>H<sub>13</sub>NI<sub>2</sub>: 400.9137, Found: 400.9132.

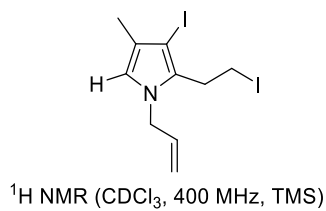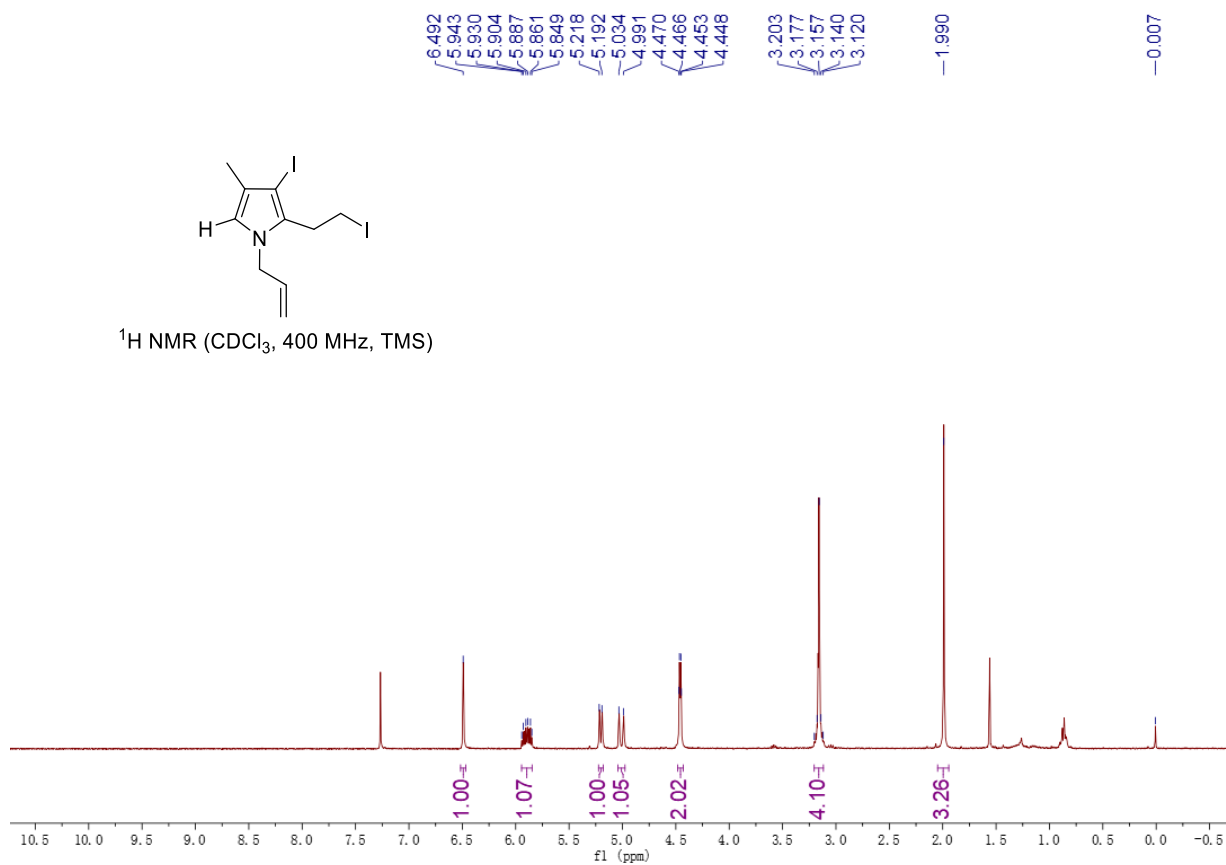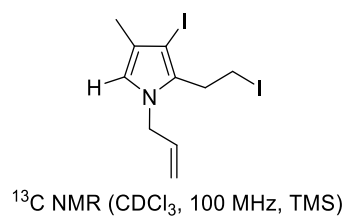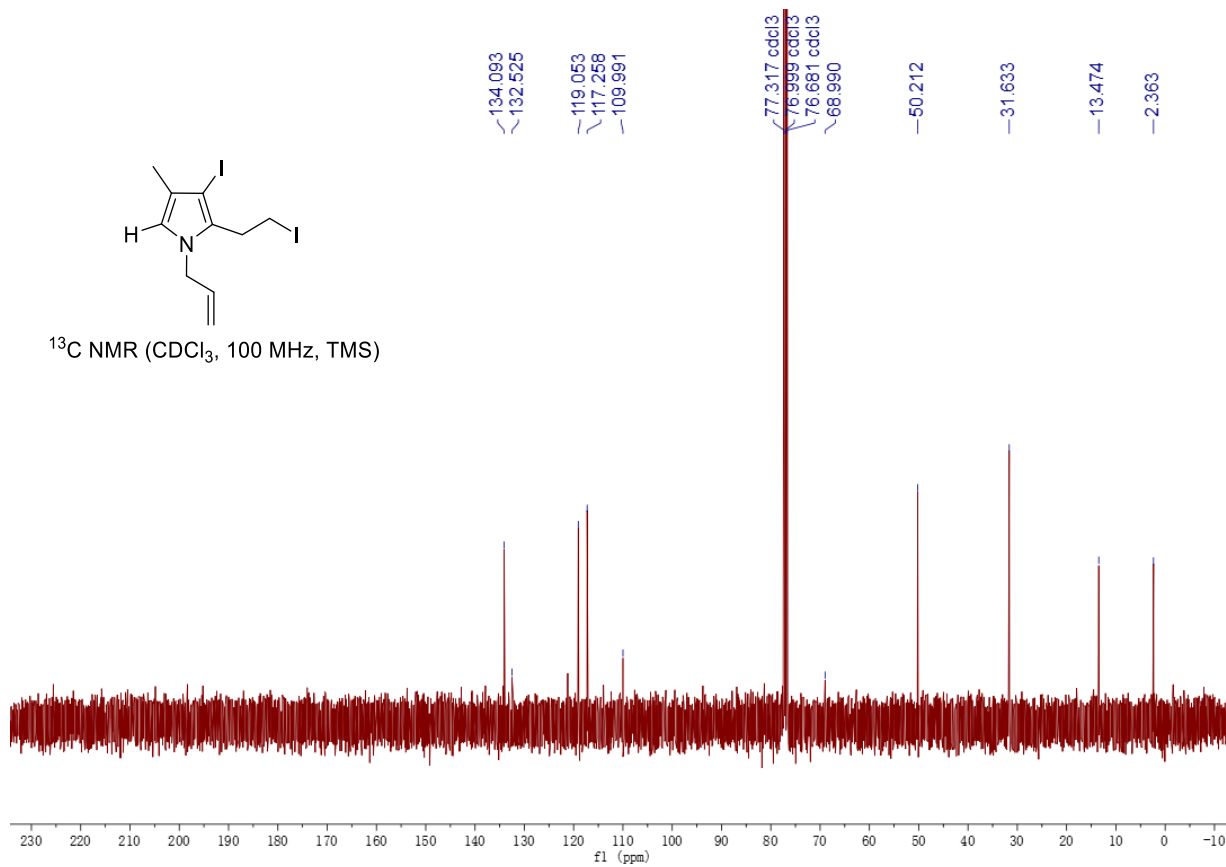

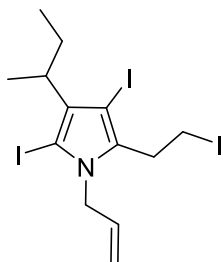

**1-allyl-3-(sec-butyl)-2,4-diiodo-5-(2-iodoethyl)-1H-pyrrole (3sa)**

A colorless oil, 52.3 mg, 92% yield.  $^1\text{H}$  NMR ( $\text{CDCl}_3$ , TMS, 400 MHz)  $\delta$  5.93 - 5.79 (m, 1H), 5.19 (d,  $J = 10.4$  Hz, 1H), 4.72 (d,  $J = 17.0$  Hz, 1H), 4.66 - 4.56 (m, 2H), 3.28 - 3.17 (m, 2H), 3.20 - 3.08 (m, 2H), 2.81 - 2.67 (m, 1H), 1.98 - 1.81 (m, 1H), 1.66 - 1.51 (m, 1H), 1.27 (d,  $J = 7.2$  Hz, 3H), 0.78 (t,  $J = 7.2$  Hz, 3H).  $^{13}\text{C}$  NMR ( $\text{CDCl}_3$ , TMS, 100 MHz)  $\delta$  137.4, 133.3, 131.5, 116.8, 51.2, 37.5, 33.2, 28.2, 19.5, 12.6, 1.9. IR (Neat)  $\nu$  733, 923, 989, 1087, 1169, 1326, 1374, 1451, 2875, 2925, 2956  $\text{cm}^{-1}$ . HRMS (EI) calcd. for  $\text{C}_{13}\text{H}_{18}\text{NI}_3$ : 568.8579, Found: 568.8568.

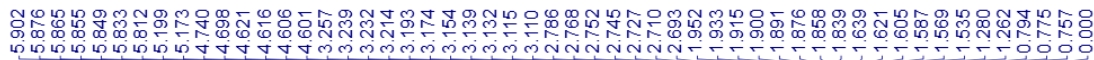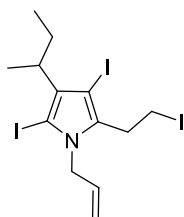

$^1\text{H}$  NMR ( $\text{CDCl}_3$ , 400 MHz, TMS)

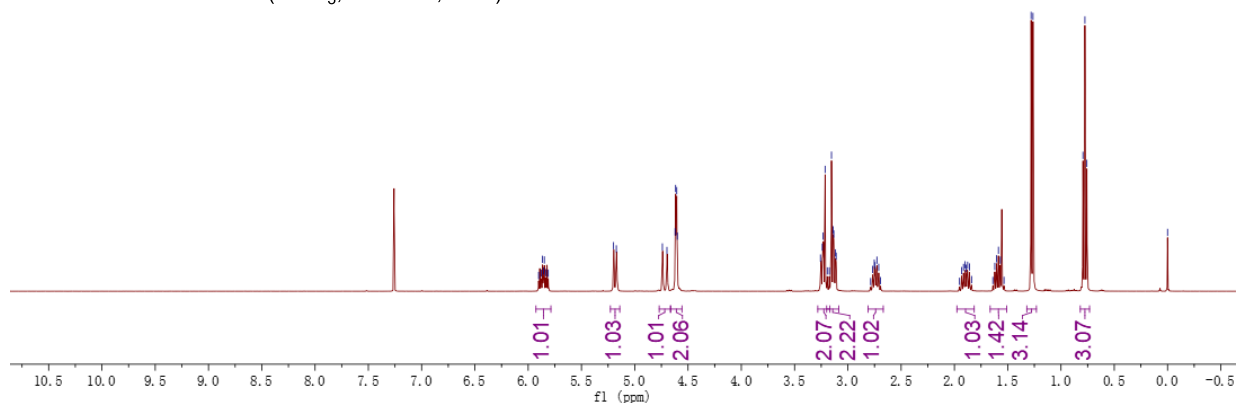

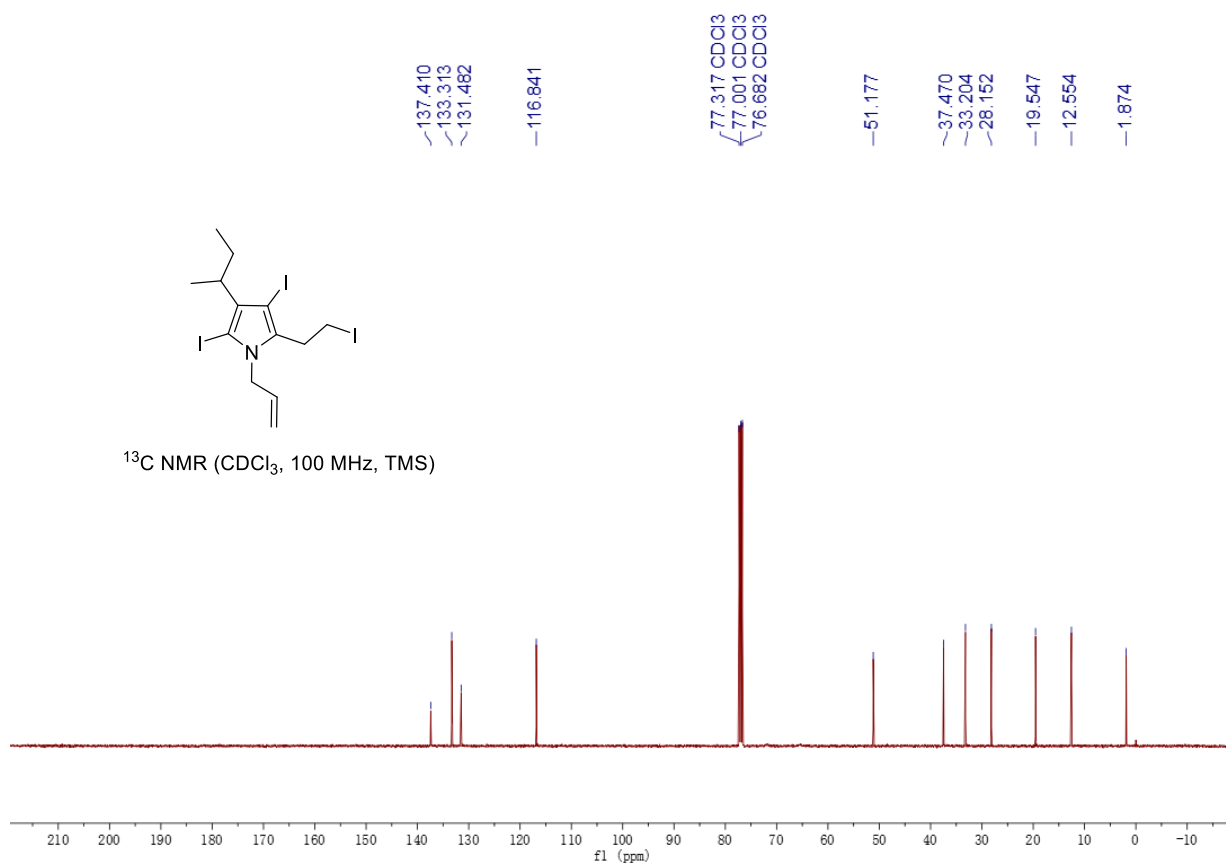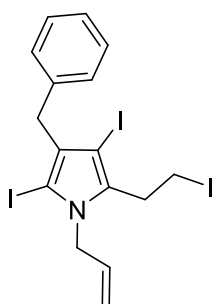

### 1-allyl-3-benzyl-2,4-diiodo-5-(2-iodoethyl)-1H-pyrrole (3ta)

A colorless oil, 48.2 mg, 80% yield. <sup>1</sup>H NMR (CDCl<sub>3</sub>, TMS, 400 MHz) δ 7.30 - 7.13 (m, 7H), 5.91 - 5.81 (m, 1H), 5.21 (d, *J* = 10.4, 0.9 Hz, 1H), 4.80 (d, *J* = 17.0, 0.9 Hz, 1H), 4.67 - 4.59 (m, 2H), 3.82 (s, 2H), 3.28 - 3.08 (m, 4H). <sup>13</sup>C NMR (CDCl<sub>3</sub>, TMS, 150 MHz) δ 139.8, 137.4, 133.1, 128.5, 128.2, 125.9, 117.1, 72.8, 68.7, 51.5, 36.1, 1.8. IR (Neat) ν 728, 925, 990, 1053, 1171, 1348, 1493, 2917, 3021 cm<sup>-1</sup>. HRMS (EI) calcd. for C<sub>16</sub>H<sub>16</sub>I<sub>3</sub>N: 602.8433, Found: 602.8411.

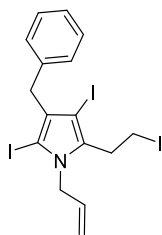

<sup>1</sup>H NMR (CDCl<sub>3</sub>, 400 MHz, TMS)

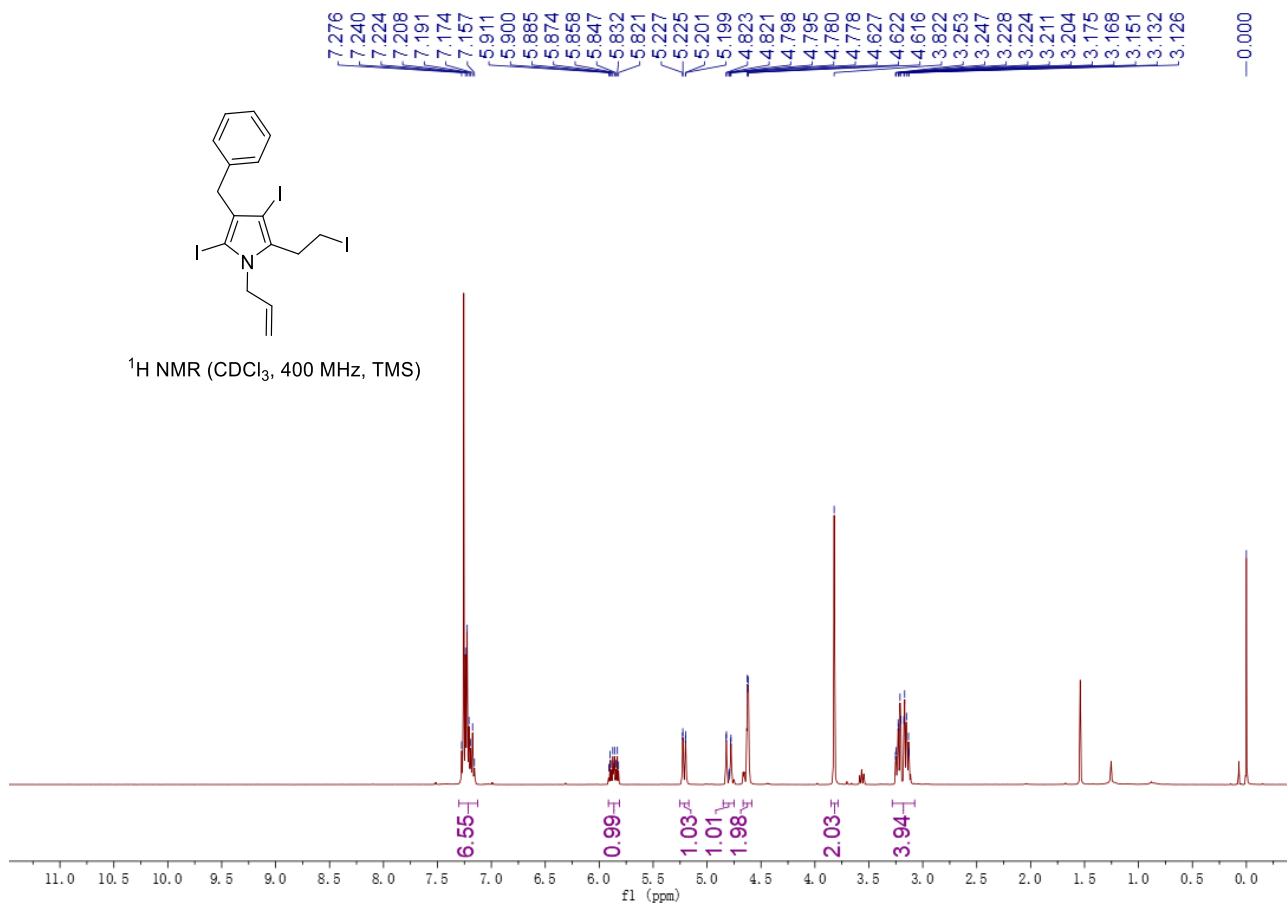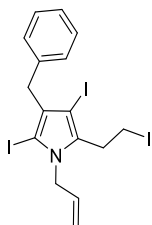

<sup>13</sup>C NMR (CDCl<sub>3</sub>, 150 MHz, TMS)

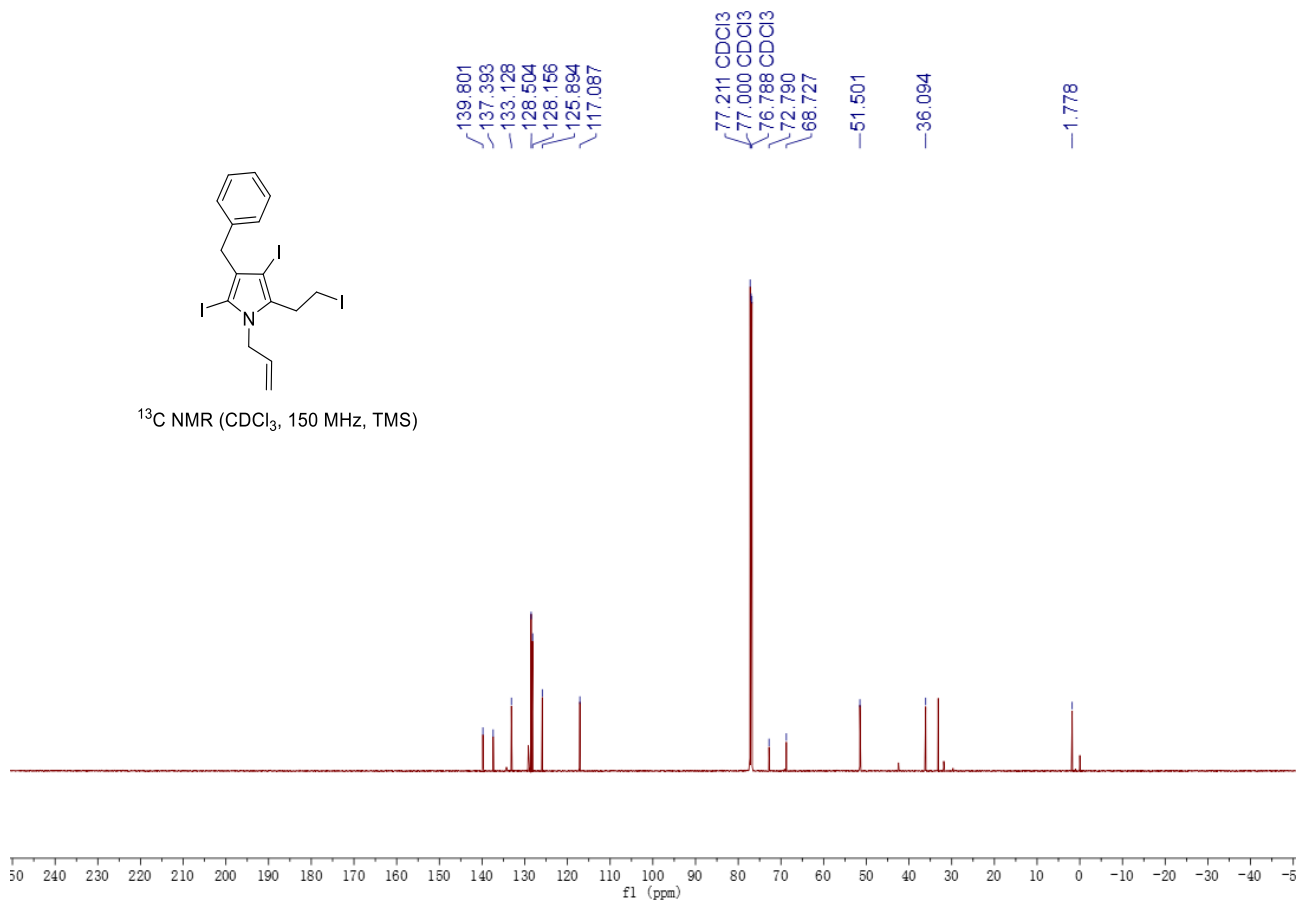



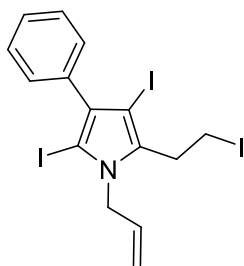

### 1-allyl-2,4-diiodo-5-(2-iodoethyl)-3-phenyl-1H-pyrrole (3ua)

A colorless oil, 5.89 mg, 10% yield.  $^1\text{H}$  NMR ( $\text{CDCl}_3$ , TMS, 400 MHz)  $\delta$  7.44 - 7.39 (m, 2H), 7.38 - 7.32 (m, 3H), 5.96 - 5.86 (m, 1H), 5.26 (d,  $J = 10.3$  Hz, 1H), 4.98 - 4.88 (m, 1H), 4.74 - 4.65 (m, 2H), 3.34 - 3.18 (m, 4H).  $^{13}\text{C}$  NMR ( $\text{CDCl}_3$ , TMS, 100 MHz)  $\delta$  137.8, 133.1, 130.5, 127.9, 127.4, 117.4, 72.2, 67.8, 51.9, 33.5, 26.9, 1.5. IR (Acetone)  $\nu$  3059, 2969, 2928, 1603, 1492, 1461, 1445, 1359, 1339, 1302, 1219, 1062, 1046, 1028, 905, 810, 759, 738, 700  $\text{cm}^{-1}$ . HRMS (ESI) calcd. for  $\text{C}_{15}\text{H}_{14}\text{I}_3\text{NNa}$  ( $\text{M}+\text{Na}$ ): 611.8758, Found: 611.9030.

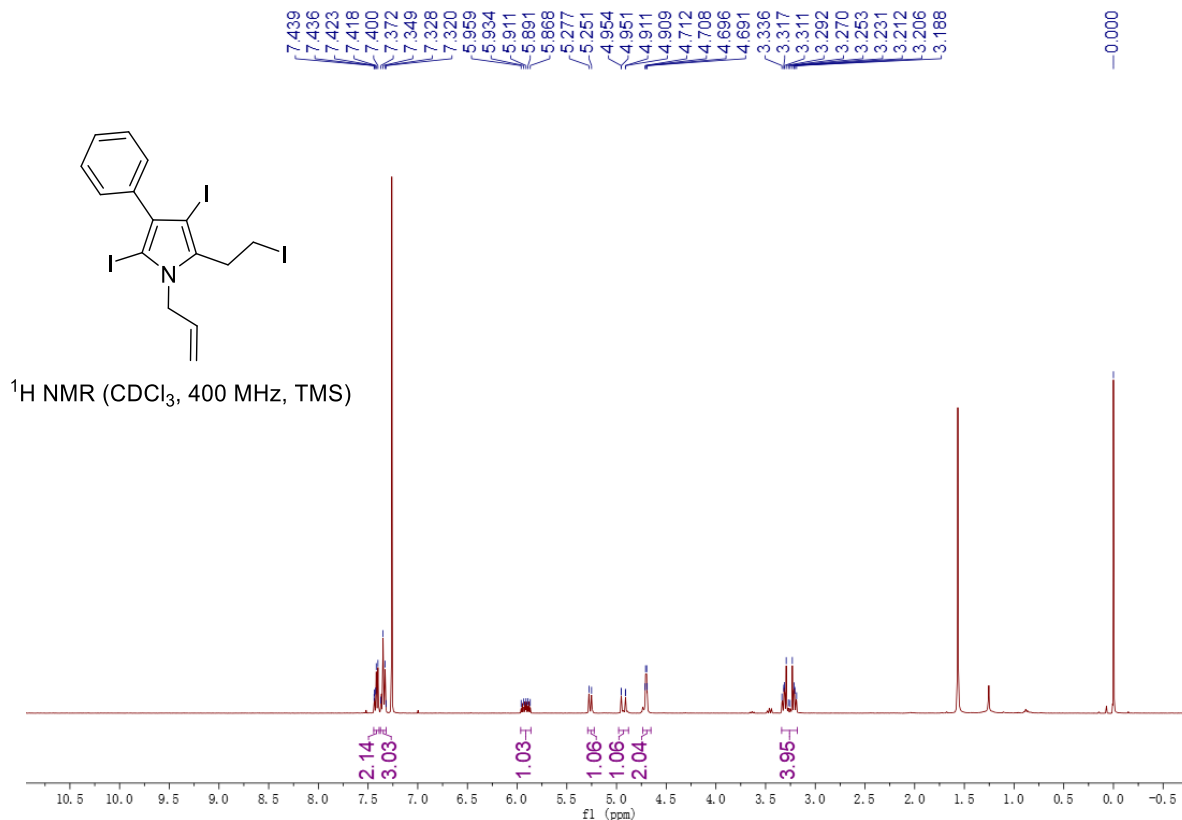

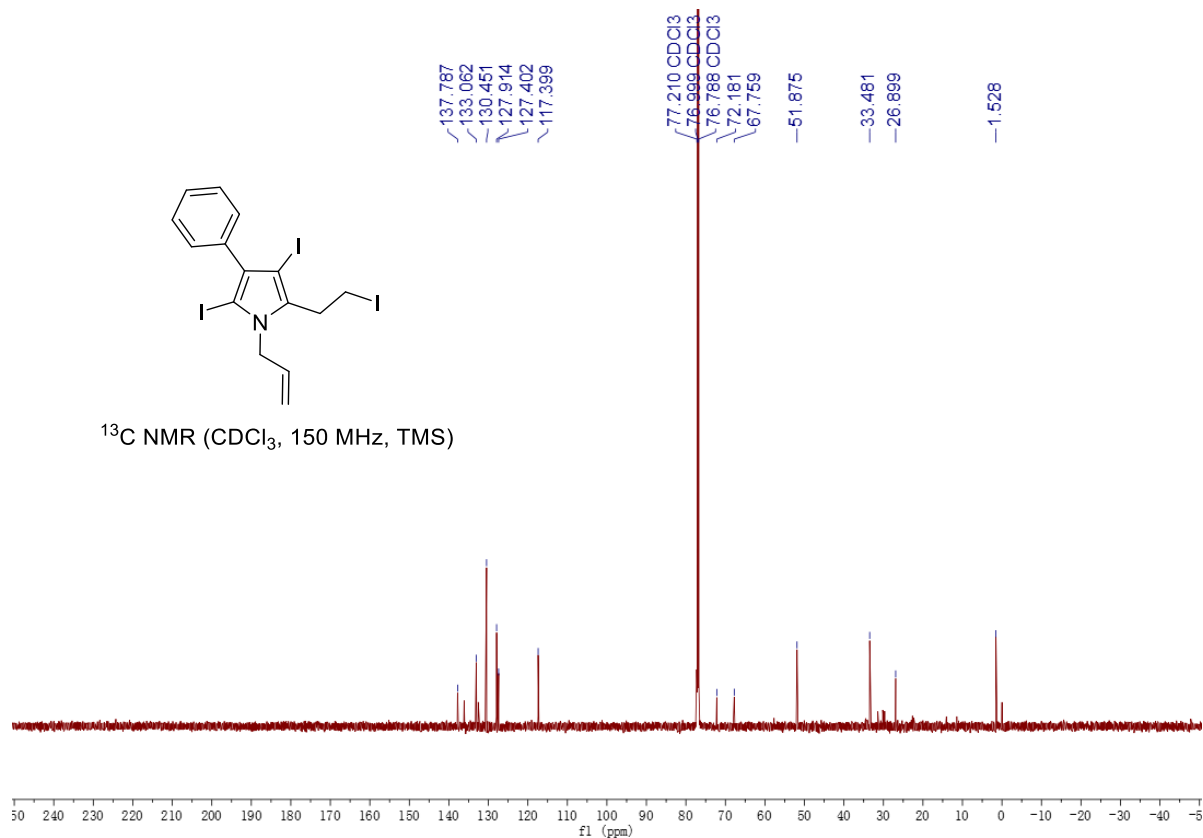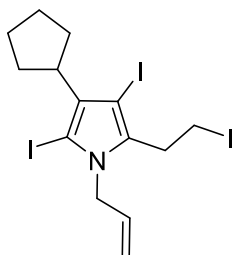

**1-allyl-3-cyclopentyl-2,4-diiodo-5-(2-iodoethyl)-1H-pyrrole (3va)**

A colorless oil, 50.5 mg, 87% yield. <sup>1</sup>H NMR (CDCl<sub>3</sub>, TMS, 400 MHz) δ 5.92 - 5.78 (m, 1H), 5.21 (d, *J* = 10.4 Hz, 1H), 4.84 (d, *J* = 17.2 Hz, 1H), 4.68 - 4.55 (m, 2H), 3.31 - 3.20 (m, 2H), 3.17 - 3.09 (m, 2H), 3.09 - 2.96 (m, 1H), 1.99 - 1.86 (m, 4H), 1.84 - 1.75 (m, 2H), 1.73 - 1.62 (m, 2H). <sup>13</sup>C NMR (CDCl<sub>3</sub>, TMS, 100 MHz) δ 137.5, 133.3, 130.0, 117.2, 71.7, 65.6, 51.4, 41.2, 33.3, 31.4, 26.4, 1.7. IR (Neat) ν 731, 906, 1169, 1341, 1398, 1448, 1647, 2859, 2949 cm<sup>-1</sup>. HRMS (EI) calcd. for C<sub>14</sub>H<sub>18</sub>I<sub>3</sub>N: 580.8584, Found: 580.8568.

5.888  
5.872  
5.860  
5.849  
5.844  
5.829  
5.806  
5.219  
5.193  
4.862  
4.819  
4.618  
4.602  
4.597  
4.597  
3.265  
3.261  
3.244  
3.236  
3.221  
3.149  
3.134  
3.126  
3.105  
3.061  
3.058  
3.036  
3.015  
2.990  
1.965  
1.964  
1.950  
1.935  
1.921  
1.908  
1.903  
1.891  
1.883  
1.872  
1.828  
1.805  
1.795  
1.780  
1.763  
1.749  
1.718  
1.709  
1.700  
1.686  
1.679  
1.671  
1.663  
1.648  
1.634  
1.621  
-0.000

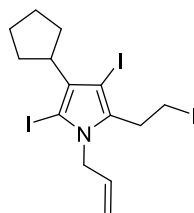

$^1\text{H NMR}$  ( $\text{CDCl}_3$ , 400 MHz, TMS)

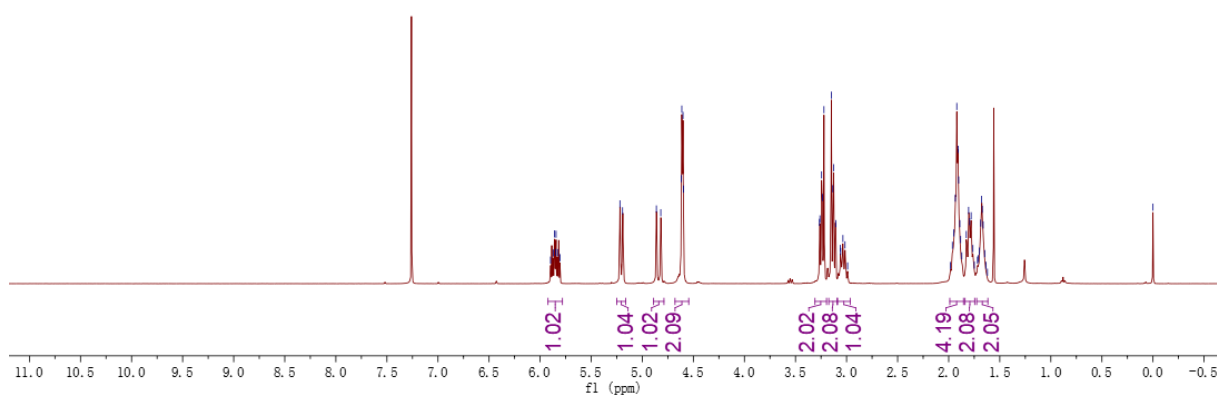

-137.526  
-133.282  
-129.950

-117.183

77.318  $\text{CDCl}_3$   
77.206  
77.001  $\text{CDCl}_3$   
76.683  $\text{CDCl}_3$   
71.721  
65.562

-51.384

41.246  
33.325  
31.368  
26.443

-1.691

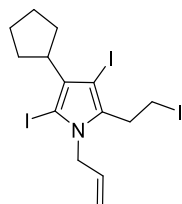

$^{13}\text{C NMR}$  ( $\text{CDCl}_3$ , 100 MHz, TMS)

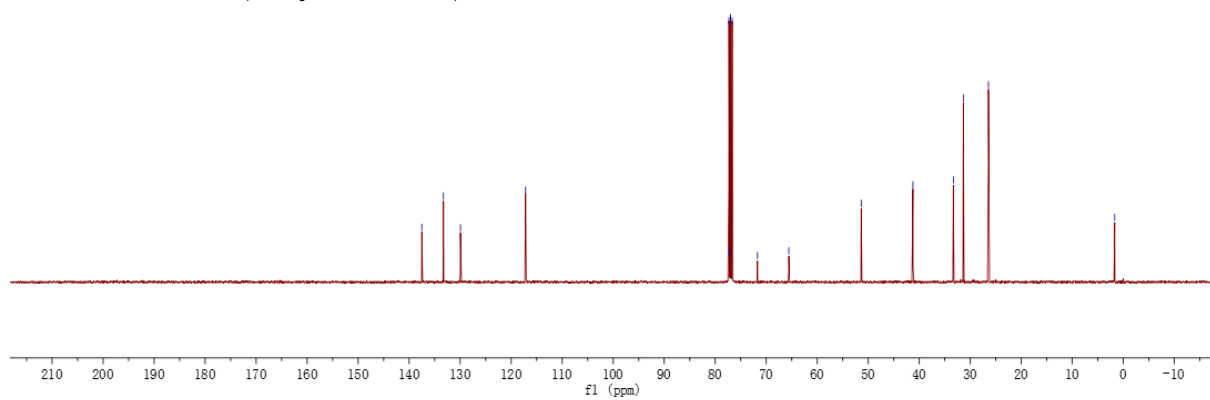

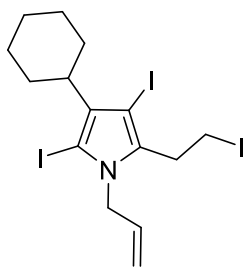

### 1-allyl-3-cyclohexyl-2,4-diiodo-5-(2-iodoethyl)-1H-pyrrole (3wa)

A colorless oil, 48.7 mg, 82% yield.  $^1\text{H}$  NMR ( $\text{CDCl}_3$ , TMS, 400 MHz)  $\delta$  5.92 - 5.78 (m, 1H), 5.19 (d,  $J = 10.4$  Hz, 1H), 4.79 (d,  $J = 17.1$  Hz, 1H), 4.66 - 4.56 (m, 2H), 3.28 - 3.18 (m, 2H), 3.17 - 3.07 (m, 2H), 2.67 - 2.54 (m, 1H), 2.11 - 1.96 (m, 2H), 1.89 - 1.78 (m, 2H), 1.74 - 1.64 (m, 1H), 1.58 - 1.49 (m, 2H), 1.44 - 1.22 (m, 3H).  $^{13}\text{C}$  NMR ( $\text{CDCl}_3$ , TMS, 100 MHz)  $\delta$  137.4, 133.3, 132.3, 117.1, 76.7, 51.3, 40.9, 33.4, 30.8, 27.0, 25.9, 1.7. IR (Acetone)  $\nu$  717, 921, 1172, 1337, 1402, 1431, 1645, 2847, 2925  $\text{cm}^{-1}$ . HRMS (EI) calcd. for  $\text{C}_{15}\text{H}_{20}\text{I}_3\text{N}$ : 594.8753, Found: 594.8724.

5.893  
5.867  
5.856  
5.840  
5.825  
5.802  
5.202  
5.176  
4.806  
4.764  
4.614  
4.609  
4.603  
4.597  
4.593  
3.257  
3.237  
3.228  
3.214  
3.143  
3.129  
3.121  
3.100  
2.636  
2.627  
2.614  
2.605  
2.596  
2.583  
2.574  
2.565  
2.055  
2.047  
2.024  
2.015  
1.984  
1.858  
1.849  
1.842  
1.817  
1.812  
1.719  
1.714  
1.689  
1.667  
1.558  
1.535  
1.530  
1.521  
1.408  
1.377  
1.368  
1.345  
1.338  
1.313  
1.289  
1.282  
1.258  
0.000

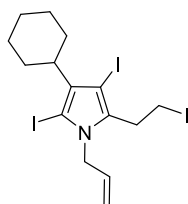

$^1\text{H}$  NMR ( $\text{CDCl}_3$ , 400 MHz, TMS)

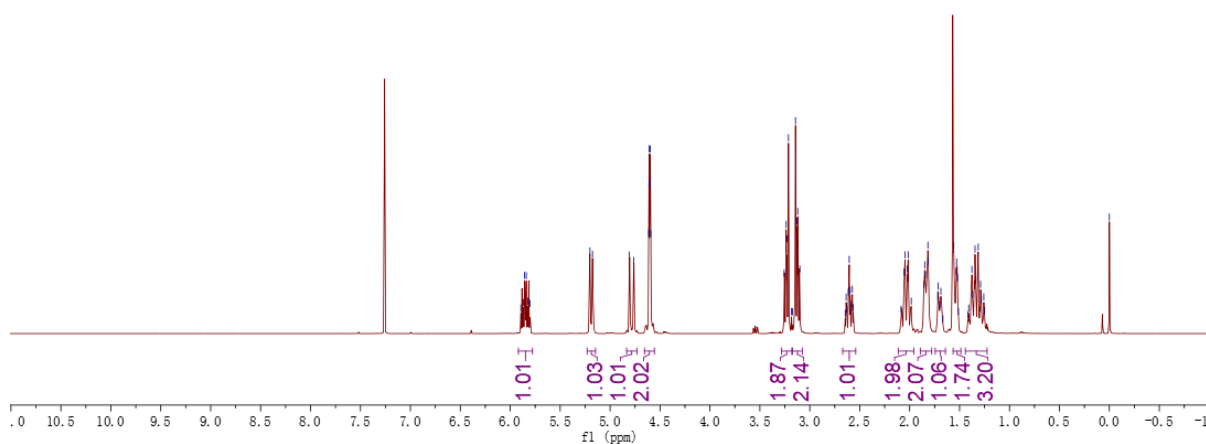

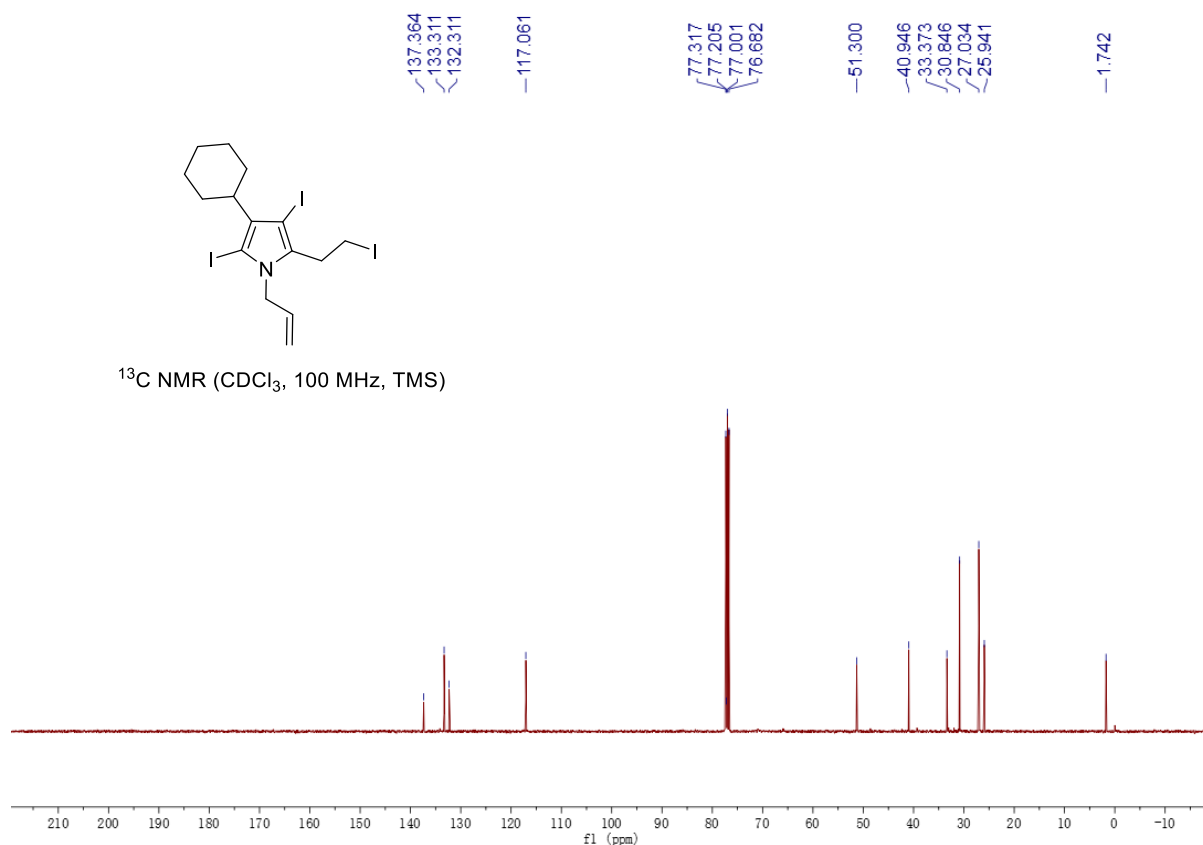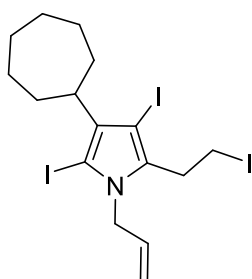

**1-allyl-3-cycloheptyl-2,4-diiodo-5-(2-iodoethyl)-1H-pyrrole (3xa)**

A colorless oil, 49.3 mg, 81% yield. <sup>1</sup>H NMR (CDCl<sub>3</sub>, TMS, 400 MHz) δ 5.92 - 5.77 (m, 1H), 5.19 (d, *J* = 10.4 Hz, 1H), 4.77 (d, *J* = 17.2 Hz, 1H), 4.65 - 4.53 (m, 2H), 3.27 - 3.17 (m, 2H), 3.17 - 3.07 (m, 2H), 2.74 (tt, *J* = 11.2, 3.6 Hz, 1H), 2.16 - 2.00 (m, 2H), 1.85 - 1.74 (m, 2H), 1.75 - 1.60 (m, 4H), 1.59 - 1.45 (m, 4H). <sup>13</sup>C NMR (CDCl<sub>3</sub>, TMS, 100 MHz) δ 137.3, 135.0, 133.3, 117.0, 76.7, 51.3, 42.6, 33.5, 33.3, 28.1, 27.8, 1.8. IR (Neat) ν 731, 921, 1170, 1327, 1401, 1444, 2235, 2848 cm<sup>-1</sup>. HRMS (EI) calcd. for C<sub>16</sub>H<sub>22</sub>I<sub>3</sub>N: 608.8910, Found: 608.8881.

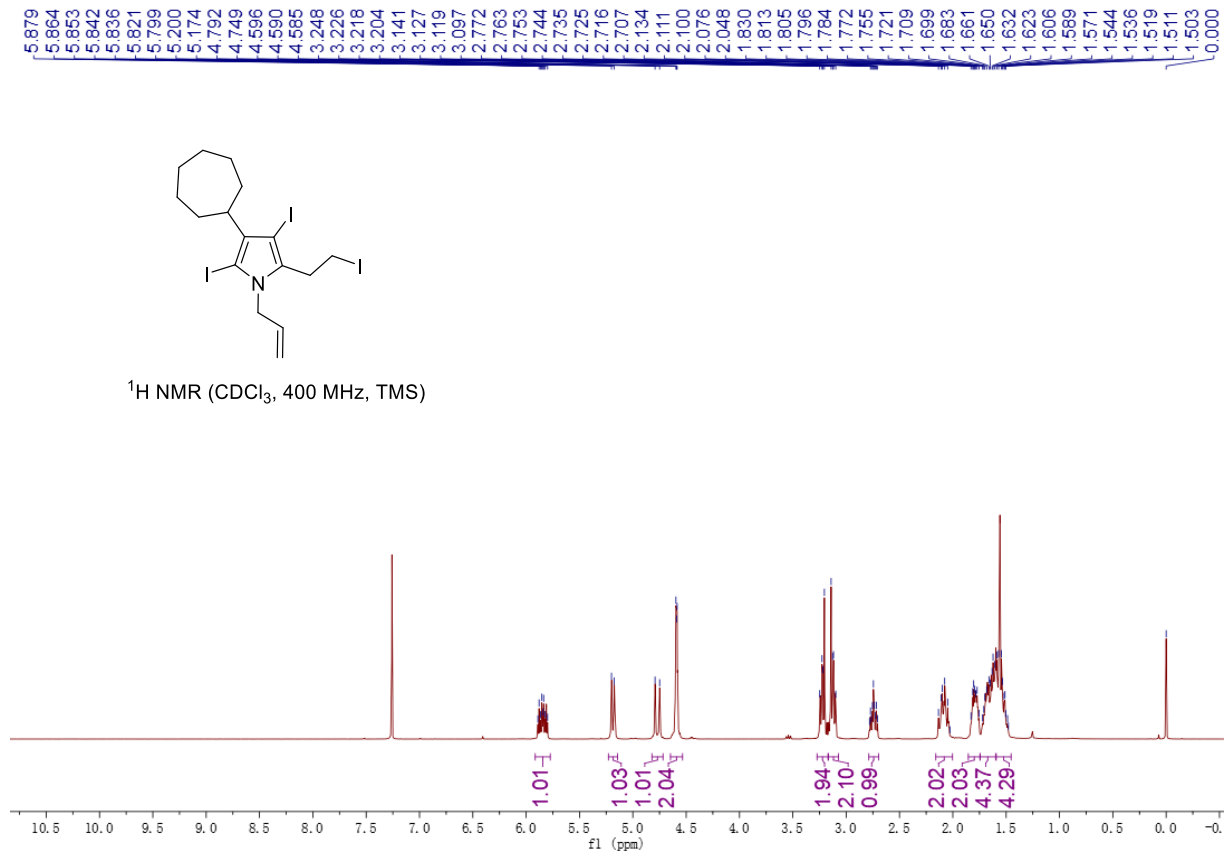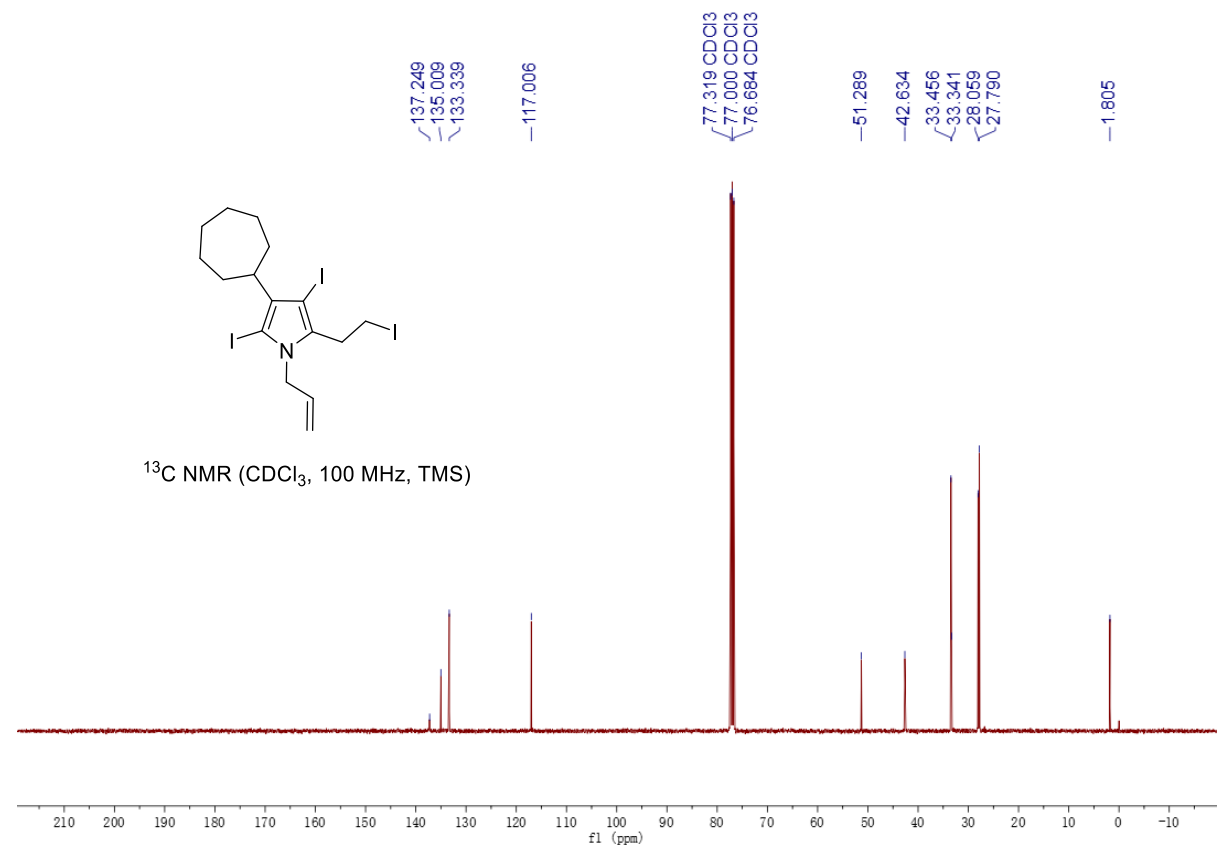

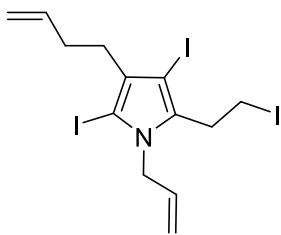

**1-allyl-3-(but-3-en-1-yl)-2,4-diiodo-5-(2-iodoethyl)-1H-pyrrole (3ya)**

A colorless oil, 41.4 mg, 73% yield.  $^1\text{H}$  NMR ( $\text{CDCl}_3$ , TMS, 400 MHz)  $\delta$  5.96 - 5.78 (m, 2H), 5.19 (d,  $J = 10.1$  Hz, 1H), 5.05 (d,  $J = 17.1$  Hz, 1H), 4.97 (d,  $J = 10.9$  Hz, 1H), 4.76 (d,  $J = 17.1$  Hz, 1H), 4.65 - 4.54 (m, 2H), 3.26 - 3.18 (m, 2H), 3.17 - 3.10 (m, 2H), 2.56 - 2.45 (m, 2H), 2.21 (q,  $J = 7.1$  Hz, 2H).  $^{13}\text{C}$  NMR ( $\text{CDCl}_3$ , TMS, 100 MHz)  $\delta$  138.0, 137.0, 133.2, 129.7, 117.0, 114.9, 71.4, 67.9, 51.3, 34.0, 33.1, 30.0, 1.8. IR (Neat)  $\nu$  729, 906, 1050, 1169, 1300 1332, 1453, 2248, 2966  $\text{cm}^{-1}$ . HRMS (ESI) calcd. for  $\text{C}_{13}\text{H}_{17}\text{I}_3\text{N}$  ( $\text{M}+\text{H}$ ): 567.8432, Found: 567.8661.

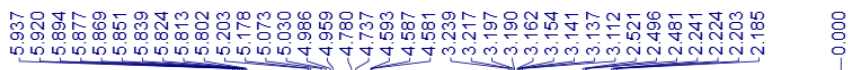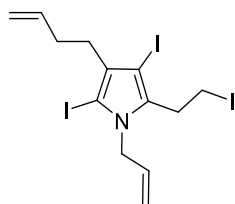

$^1\text{H}$  NMR ( $\text{CDCl}_3$ , 400 MHz, TMS)

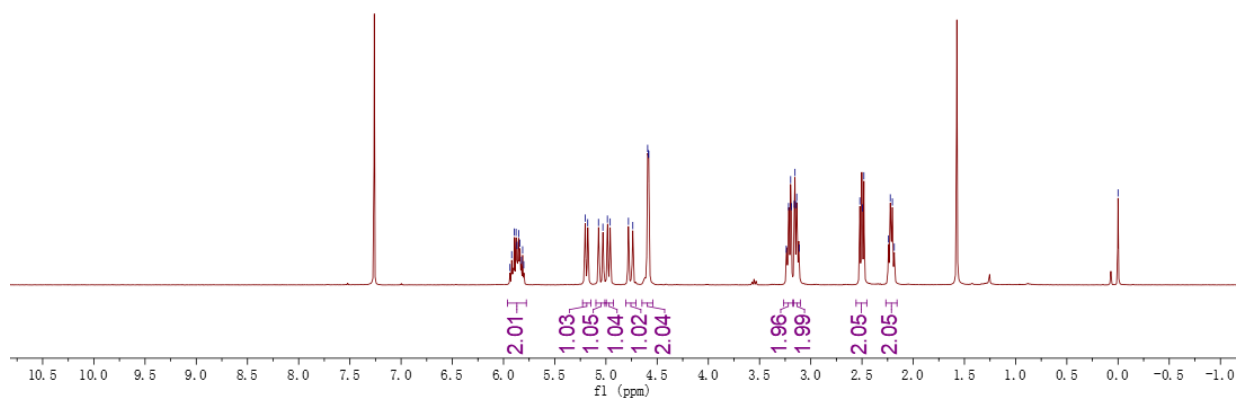

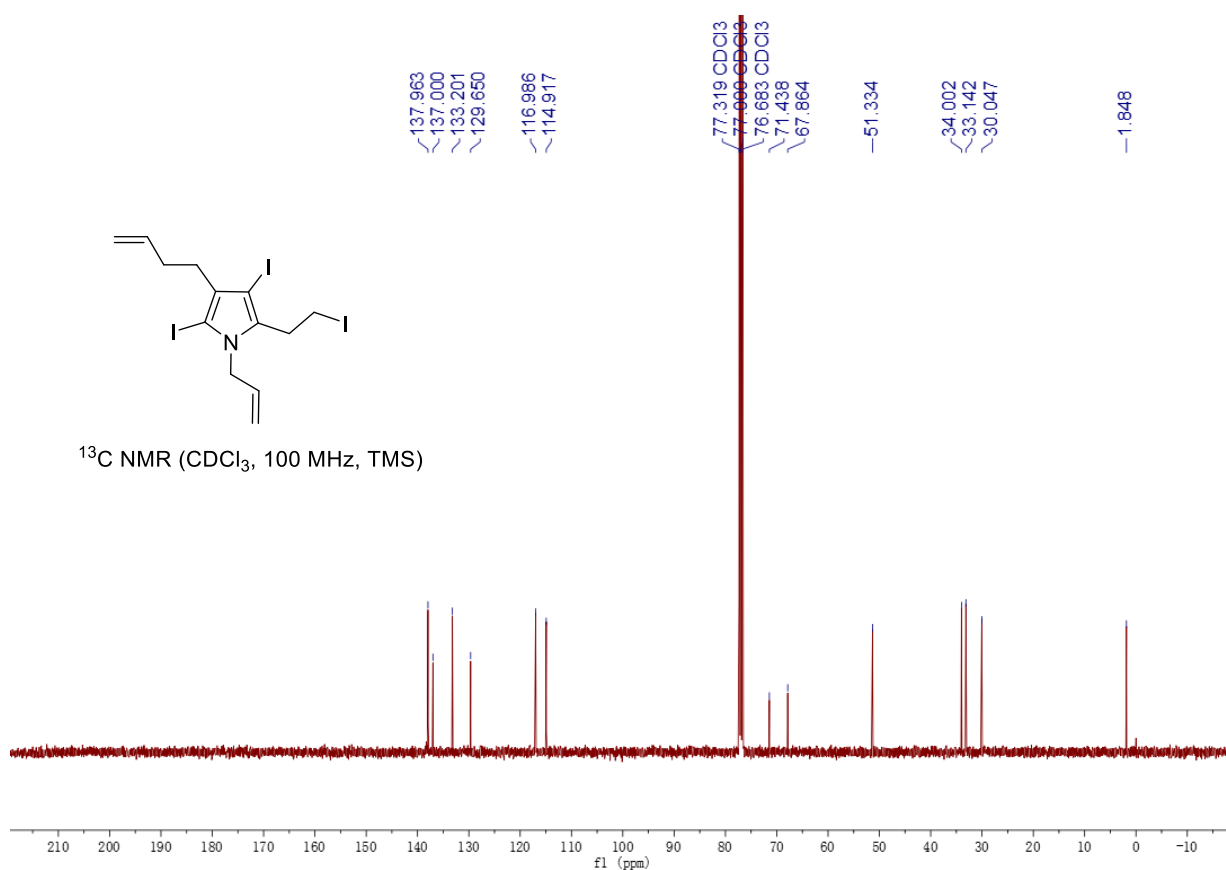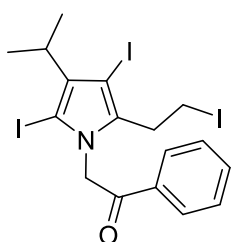

**2-(2,4-diiodo-5-(2-iodoethyl)-3-isopropyl-1H-pyrrol-1-yl)-1-phenylethan-1-one (3za)**

A colorless oil, 27.2 mg, 43% yield. <sup>1</sup>H NMR (CDCl<sub>3</sub>, TMS, 400 MHz) δ 8.03 (d, *J* = 7.0 Hz, 2H), 7.69 (t, *J* = 7.5 Hz, 1H), 7.57 (t, *J* = 7.8 Hz, 2H), 5.45 (s, 2H), 3.25 - 3.09 (m, 4H), 3.02 (p, *J* = 7.1 Hz, 1H), 1.32 (d, *J* = 7.1 Hz, 6H). <sup>13</sup>C NMR (CDCl<sub>3</sub>, TMS, 100 MHz) δ 192.4, 138.0, 134.4, 133.4, 129.1, 128.1, 117.7, 104.9, 55.0, 50.4, 33.5, 30.7, 21.3, 1.7. IR (Acetone) ν 733, 925, 995, 1210.60, 1271, 1313, 1353, 1449, 1715, 2950 cm<sup>-1</sup>. HRMS (ESI) calcd. for C<sub>17</sub>H<sub>18</sub>I<sub>3</sub>NONa (M+Na): 655.8420, Found: 655.8408.



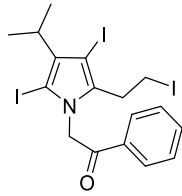

$^1\text{H NMR}$  ( $\text{CDCl}_3$ , 400 MHz, TMS)

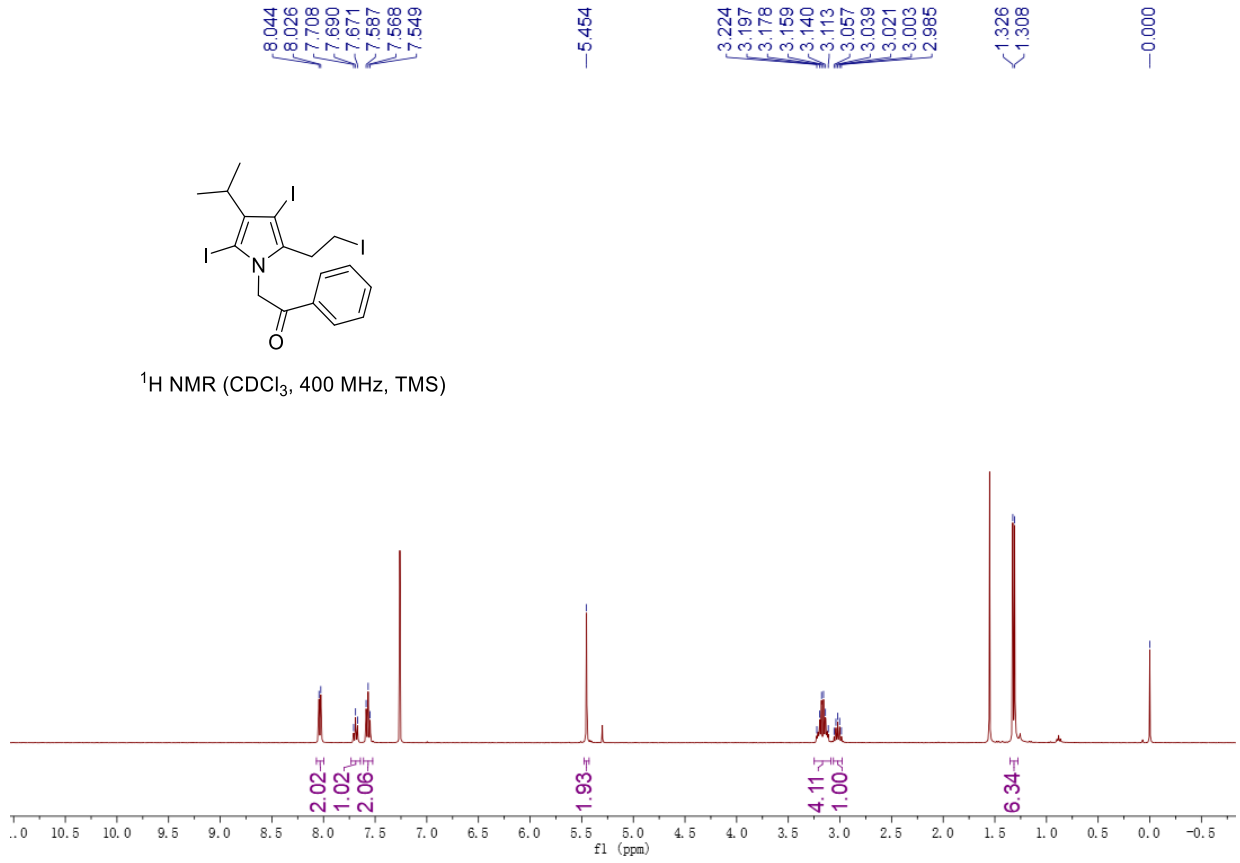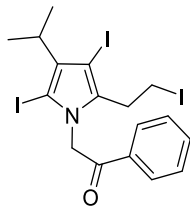

$^{13}\text{C NMR}$  ( $\text{CDCl}_3$ , 100 MHz, TMS)

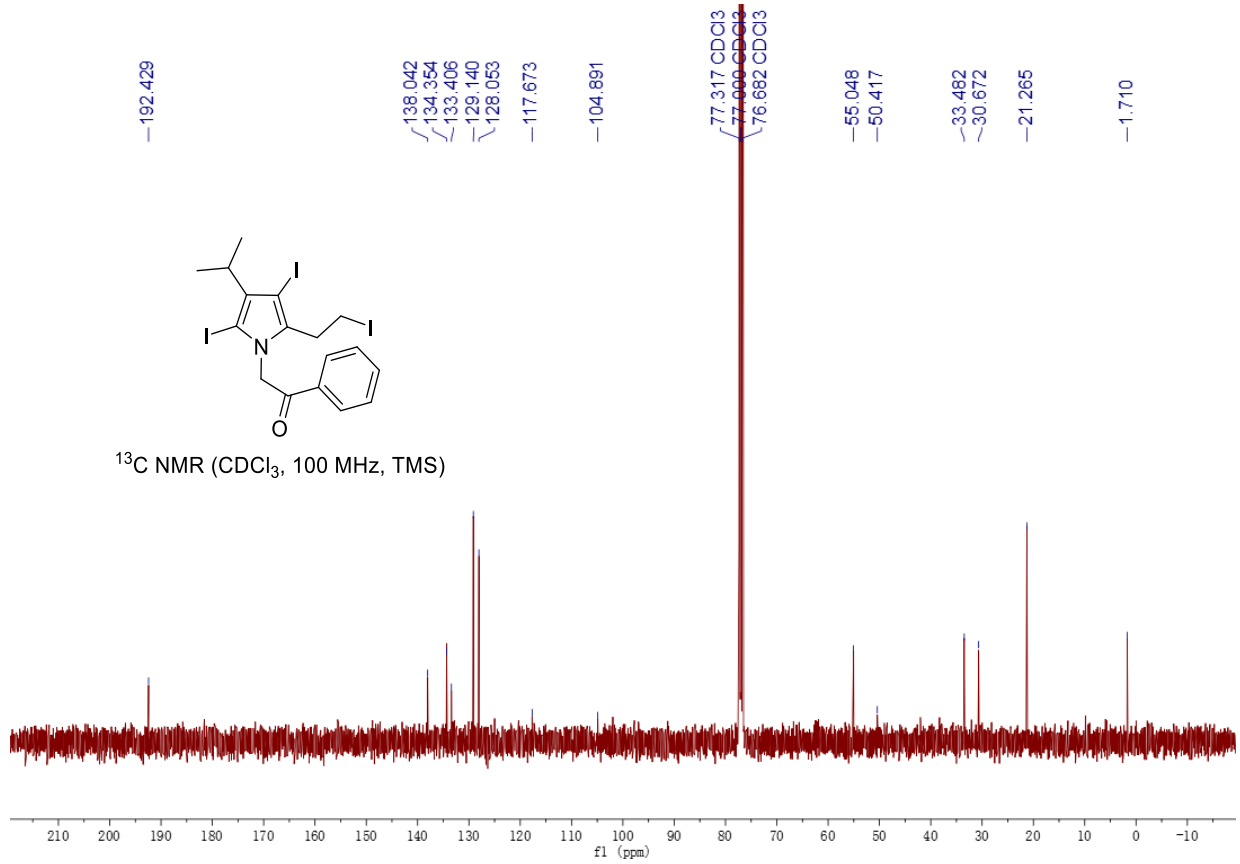

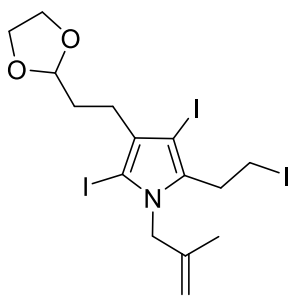

**3-(2-(1,3-dioxolan-2-yl)ethyl)-2,4-diiodo-5-(2-iodoethyl)-1-(2-methylallyl)-1H-pyrrole (3afa)**

A colorless oil, 50.8 mg, 81% yield.  $^1\text{H}$  NMR ( $\text{CDCl}_3$ , TMS, 400 MHz)  $\delta$  4.91 (t,  $J = 4.7$  Hz, 1H), 4.87 (s, 1H), 4.44 (s, 2H), 4.23 (s, 1H), 4.06 - 3.96 (m, 2H), 3.92 - 3.83 (m, 2H), 3.24 - 3.06 (m, 4H), 2.59 - 2.50 (m, 2H), 1.87 - 1.77 (m, 2H), 1.75 (s, 3H).  $^{13}\text{C}$  NMR ( $\text{CDCl}_3$ , TMS, 100 MHz)  $\delta$  140.9, 137.2, 129.3, 111.8, 103.8, 72.1, 67.7, 64.9, 54.5, 33.8, 33.2, 25.2, 20.0, 1.8. IR (Acetone)  $\nu$  716, 896, 965, 1066, 1180, 1325, 1445, 2920  $\text{cm}^{-1}$ . HRMS (ESI) calcd. for  $\text{C}_{15}\text{H}_{20}\text{NO}_2\text{NaI}_3$  ( $\text{M}+\text{Na}$ ): 649.8520, Found: 649.8517.

4.924  
4.913  
4.901  
4.875  
4.441  
4.227  
4.030  
4.013  
4.004  
3.969  
3.918  
3.893  
3.884  
3.876  
3.858  
3.211  
3.195  
3.185  
3.164  
3.137  
3.121  
3.110  
3.094  
2.569  
2.555  
2.549  
2.542  
2.529  
1.846  
1.814  
1.794  
1.745  
-0.000

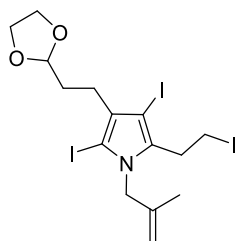

$^1\text{H}$  NMR ( $\text{CDCl}_3$ , 400 MHz, TMS)

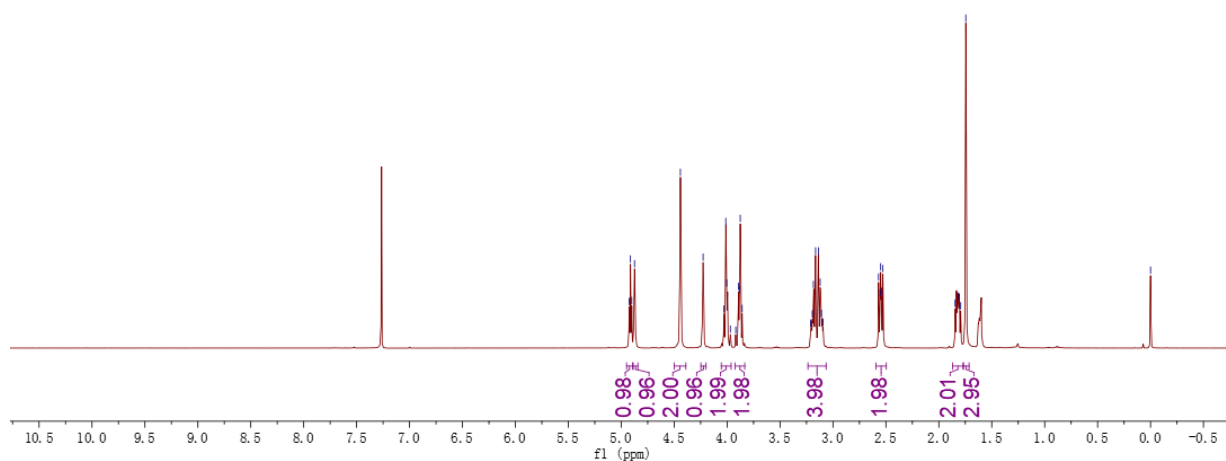

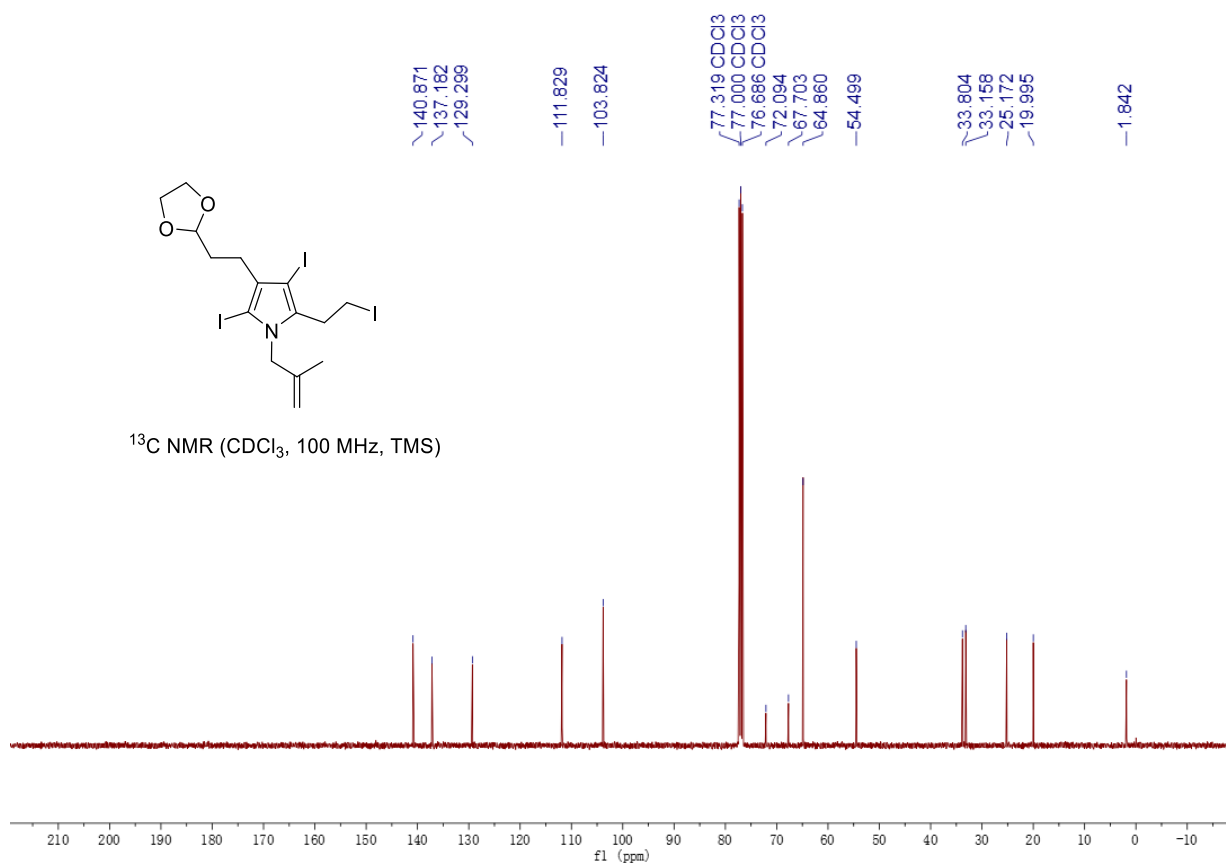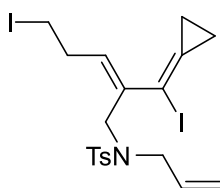

**(*E*)-*N*-allyl-*N*-(2-(cyclopropylideneiodomethyl)-5-iodopent-2-en-1-yl)-4-methylbenzenesulfonamide (3aja)**

A colorless oil, 50.8 mg, 40% yield. <sup>1</sup>H NMR (CDCl<sub>3</sub>, TMS, 400 MHz) δ 7.71 (d, *J* = 8.3 Hz, 2H), 7.28 (d, *J* = 8.2 Hz, 2H), 5.63 - 5.52 (m, 1H), 5.40 (t, *J* = 7.0 Hz, 1H), 5.26 - 5.12 (m, 2H), 3.95 (s, 2H), 3.84 (d, *J* = 6.5 Hz, 2H), 3.14 (t, *J* = 7.0 Hz, 2H), 2.61 (q, *J* = 7.0 Hz, 2H), 2.43 (s, 3H), 1.49 - 1.43 (m, 2H), 1.16 - 1.11 (m, 2H). <sup>13</sup>C NMR (CDCl<sub>3</sub>, TMS, 100 MHz) δ 143.1, 138.1, 137.7, 136.1, 132.3, 130.6, 129.6, 127.2, 119.8, 81.8, 50.0, 49.4, 32.7, 21.5, 13.9, 9.6, 3.3. IR (Acetone) ν 719, 890, 993, 1036, 1200, 1325, 1455, 2930 cm<sup>-1</sup>. HRMS (ESI) calcd. for C<sub>19</sub>H<sub>23</sub>NO<sub>2</sub>NaSI<sub>2</sub> (M+Na): 605.9431, Found: 605.9442

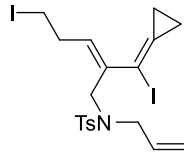

$^1\text{H NMR}$  ( $\text{CDCl}_3$ , 400 MHz, TMS)

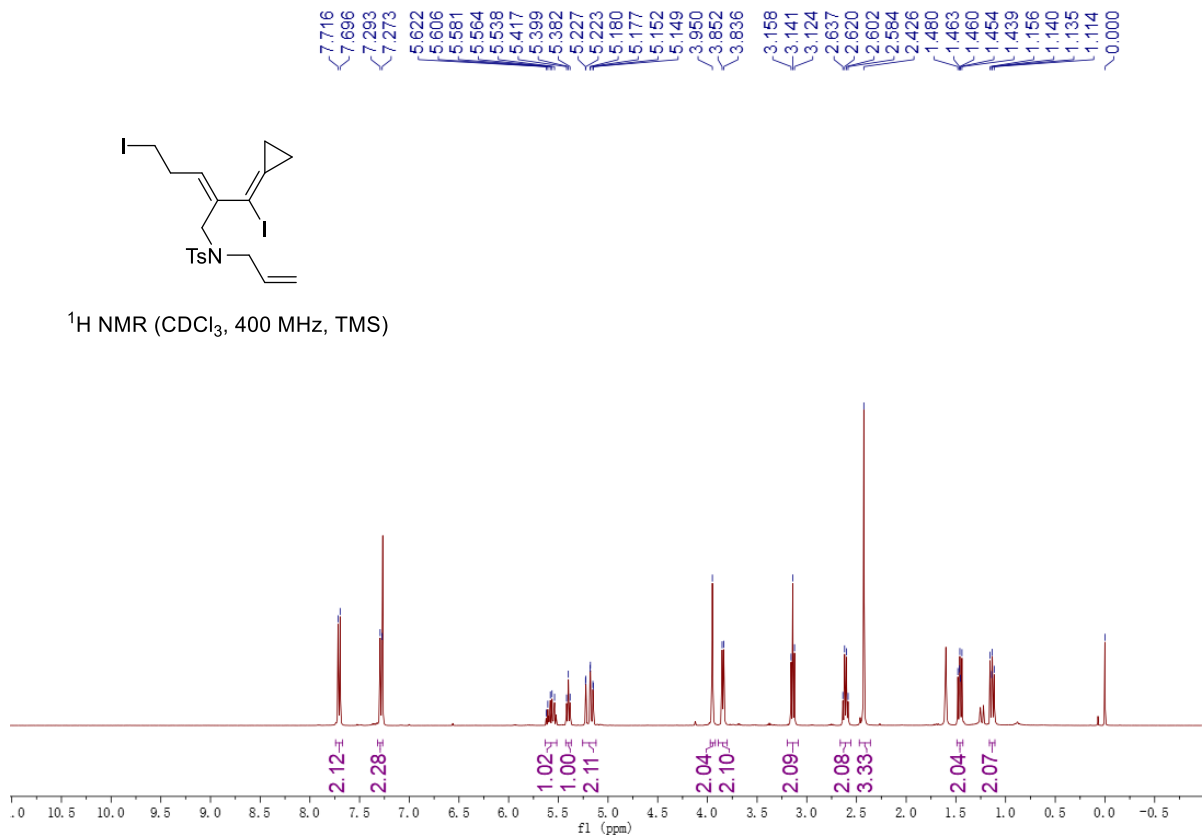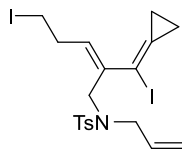

$^{13}\text{C NMR}$  ( $\text{CDCl}_3$ , 100 MHz, TMS)

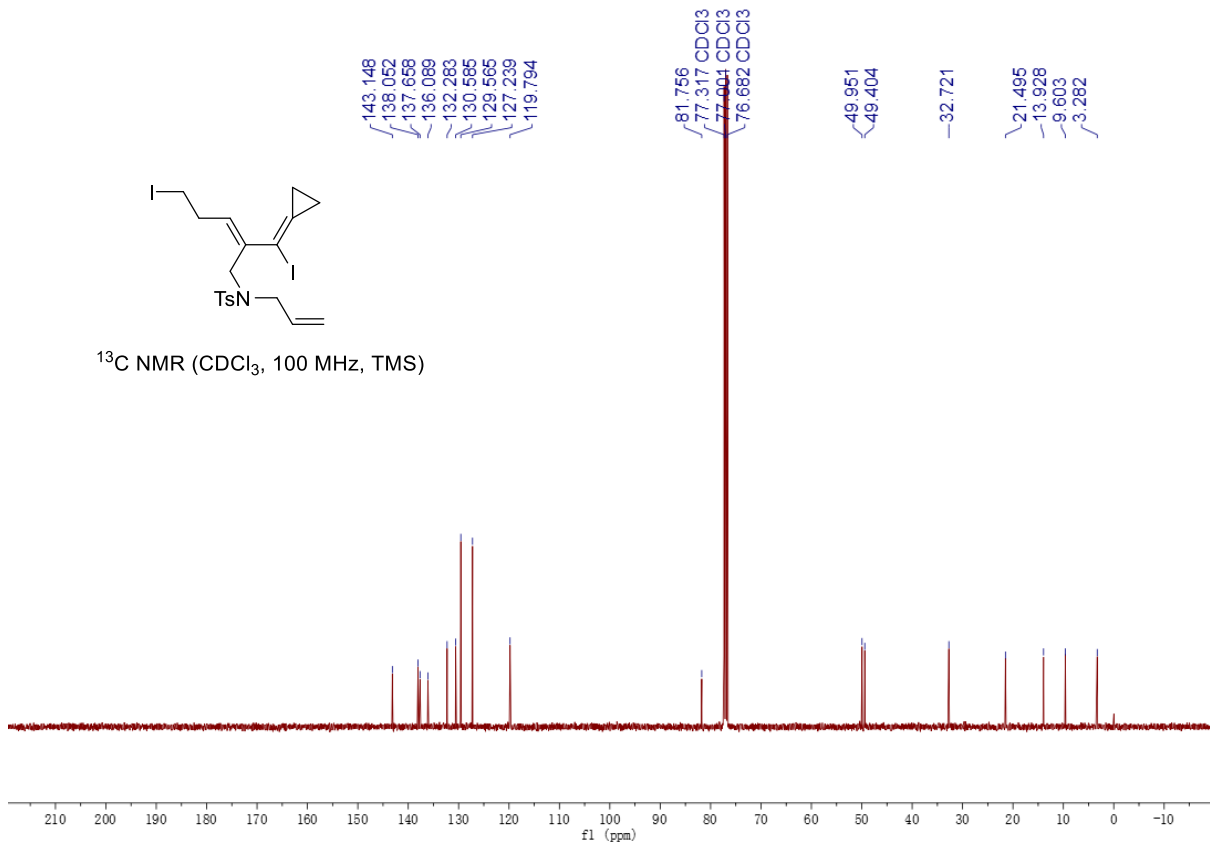

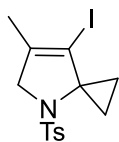

### 7-iodo-6-methyl-4-tosyl-4-azaspiro[2.4]hept-6-ene (3aka')

A colorless oil, 35.8 mg, 46% yield.  $^1\text{H}$  NMR ( $\text{CDCl}_3$ , TMS, 400 MHz)  $\delta$  7.93 (d,  $J = 8.4$  Hz, 2H), 7.36 (d,  $J = 8.1$  Hz, 2H), 4.23 (d,  $J = 9.7$  Hz, 1H), 3.79 (d,  $J = 9.6$  Hz, 1H), 2.46 (s, 3H), 1.76 (s, 4H), 1.69 - 1.61 (m, 1H), 1.13 - 0.99 (m, 2H).  $^{13}\text{C}$  NMR ( $\text{CDCl}_3$ , TMS, 100 MHz)  $\delta$  150.8, 145.7, 136.2, 134.1, 129.9, 128.3, 91.1, 82.7, 55.6, 25.5, 21.8, 15.7, 8.3. IR (Acetone)  $\nu$  694, 778, 901, 957, 1123, 1210, 1335, 1445, 2960  $\text{cm}^{-1}$ . HRMS (ESI) calcd. for  $\text{C}_{14}\text{H}_{17}\text{NO}_2\text{SI}$  ( $\text{M}+\text{H}$ ): 390.0019, Found: 390.0001

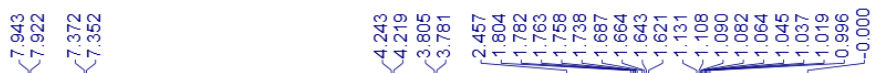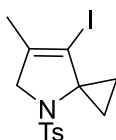

$^1\text{H}$  NMR ( $\text{CDCl}_3$ , 400MHz, TMS)

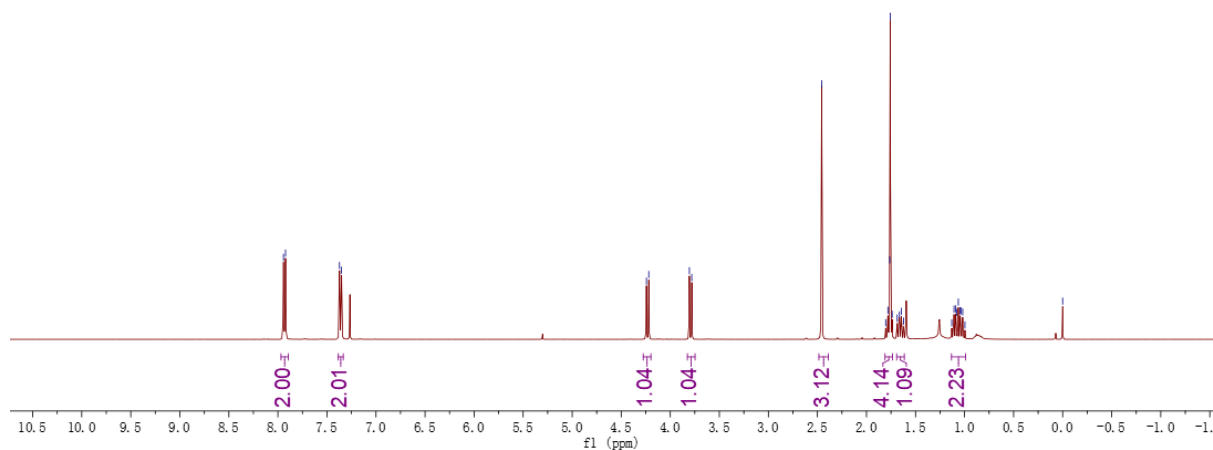

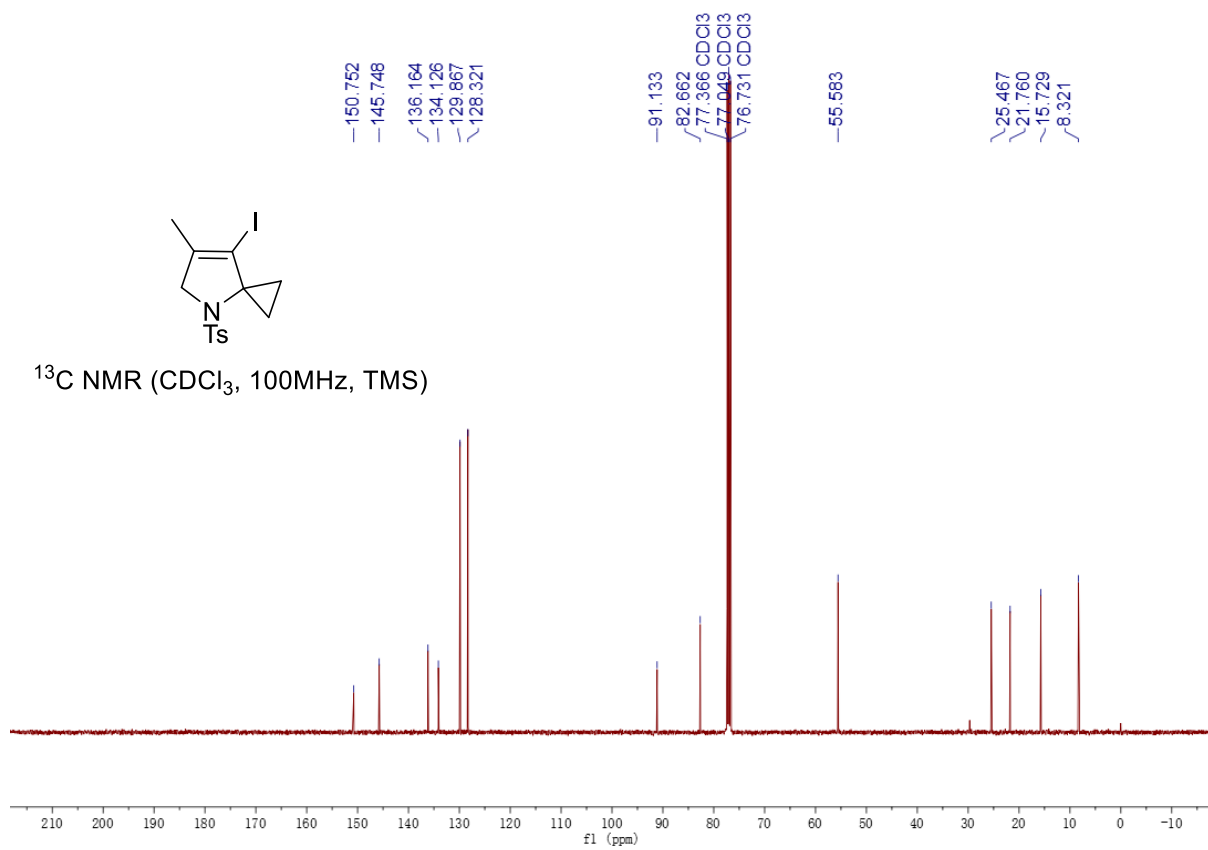

## 9. Spectroscopic data of products 4.

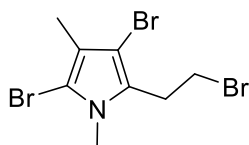

### 2,4-dibromo-5-(2-bromoethyl)-1,3-dimethyl-1H-pyrrole (4a)

A colorless oil, 21.6 mg, 60% yield.  $^1\text{H}$  NMR ( $\text{CDCl}_3$ , TMS, 400 MHz)  $\delta$  3.55 (s, 3H), 3.42 (t,  $J = 7.8$  Hz, 2H), 3.19 (t,  $J = 7.8$  Hz, 2H), 1.99 (s, 3H).  $^{13}\text{C}$  NMR ( $\text{CDCl}_3$ , TMS, 100 MHz)  $\delta$  128.1, 117.4, 101.2, 98.1, 33.4, 29.7, 29.6, 11.6. IR (Neat)  $\nu$  731, 757, 909, 943, 1165, 1348, 1530, 2922  $\text{cm}^{-1}$ . HRMS (ESI) calcd. for  $\text{C}_8\text{H}_{11}\text{NBr}_3$  ( $\text{M}+\text{H}$ ): 360.8240, Found: 360.8343.

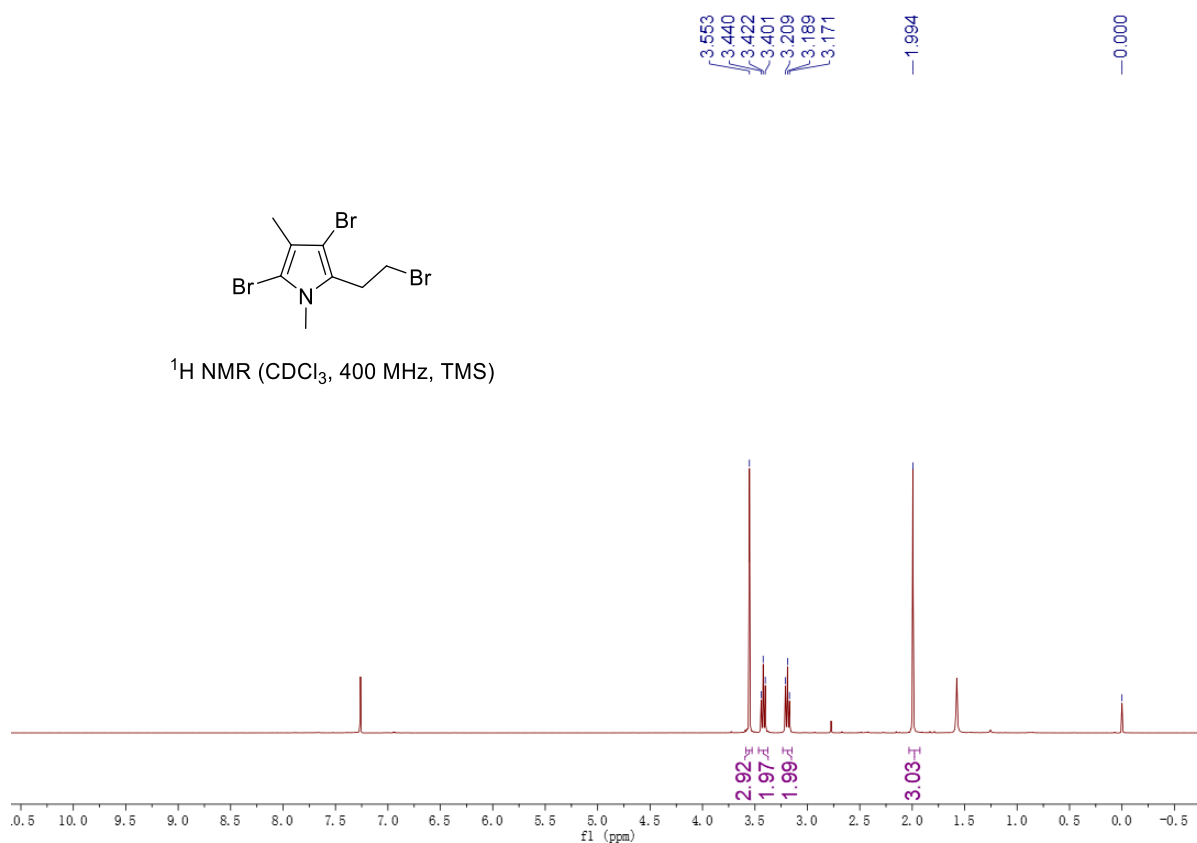

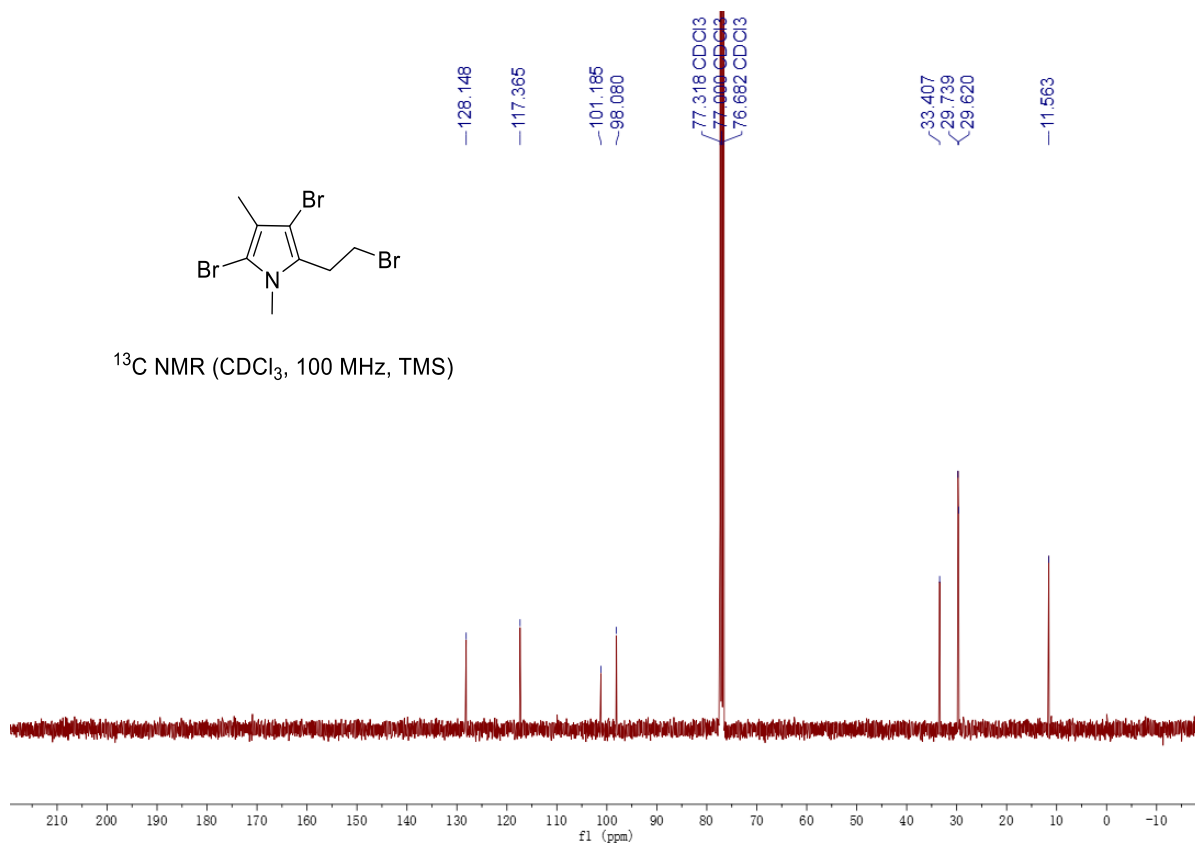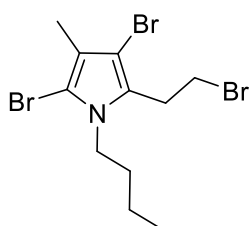

**2,4-dibromo-5-(2-bromoethyl)-1-butyl-3-methyl-1H-pyrrole (4b)**

A colorless oil, 28.1 mg, 70% yield. <sup>1</sup>H NMR (CDCl<sub>3</sub>, TMS, 400 MHz) δ 3.88 (t, *J* = 7.8 Hz, 2H), 3.42 (t, *J* = 8.0 Hz, 2H), 3.16 (t, *J* = 8.0 Hz, 2H), 1.99 (s, 3H), 1.65 - 1.56 (m, 2H), 1.43 - 1.29 (m, 2H), 0.96 (t, *J* = 7.4 Hz, 3H). <sup>13</sup>C NMR CDCl<sub>3</sub>, TMS, 100 MHz) δ 127.5, 117.5, 100.3, 98.2, 46.3, 33.3, 29.8, 29.6, 19.9, 13.8, 11.5. IR (Neat) ν 762, 878, 1165, 1352, 1453, 1524, 2959 cm<sup>-1</sup>. HRMS (ESI) calcd. for C<sub>11</sub>H<sub>17</sub>NBr<sub>3</sub> (M+H): 403.8870, Found: 403.9716.



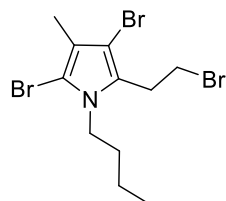

$^1\text{H NMR}$  ( $\text{CDCl}_3$ , 400 MHz, TMS)

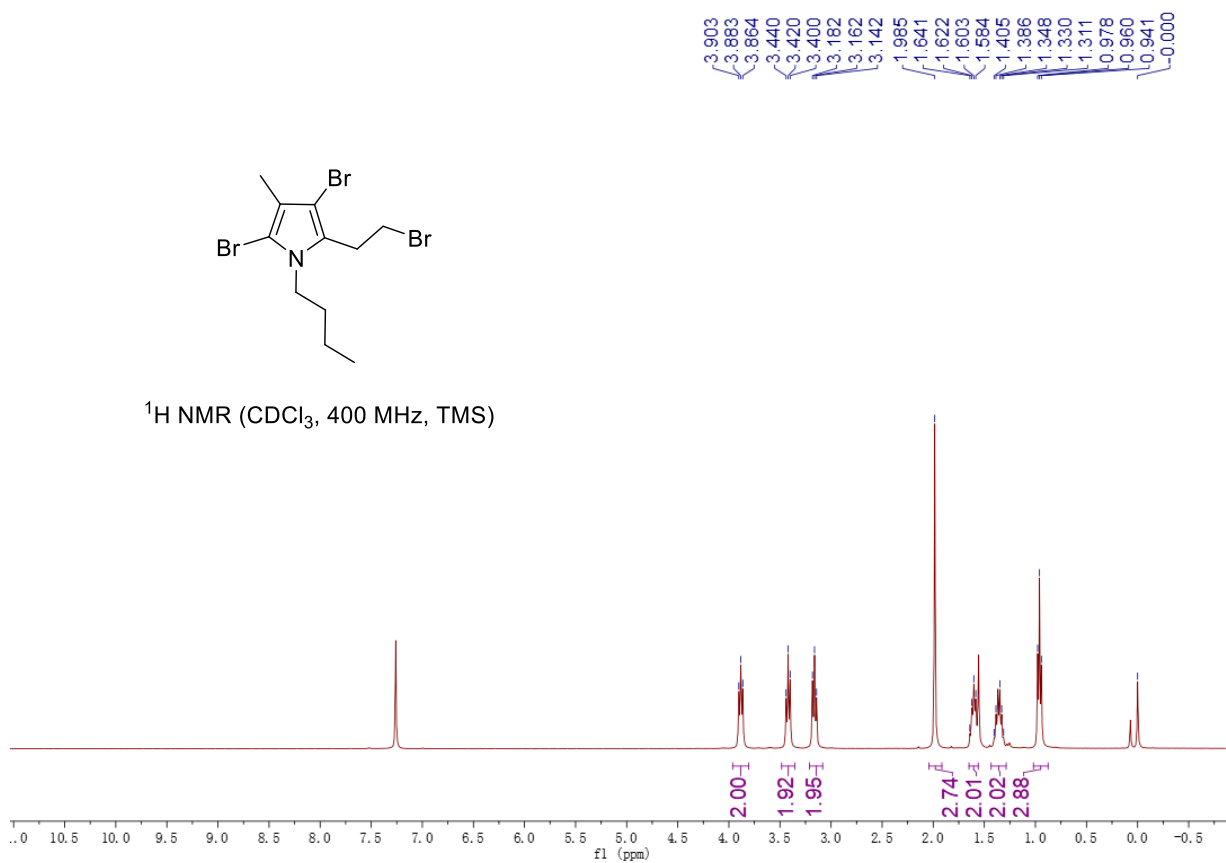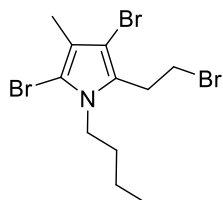

$^{13}\text{C NMR}$  ( $\text{CDCl}_3$ , 100 MHz, TMS)

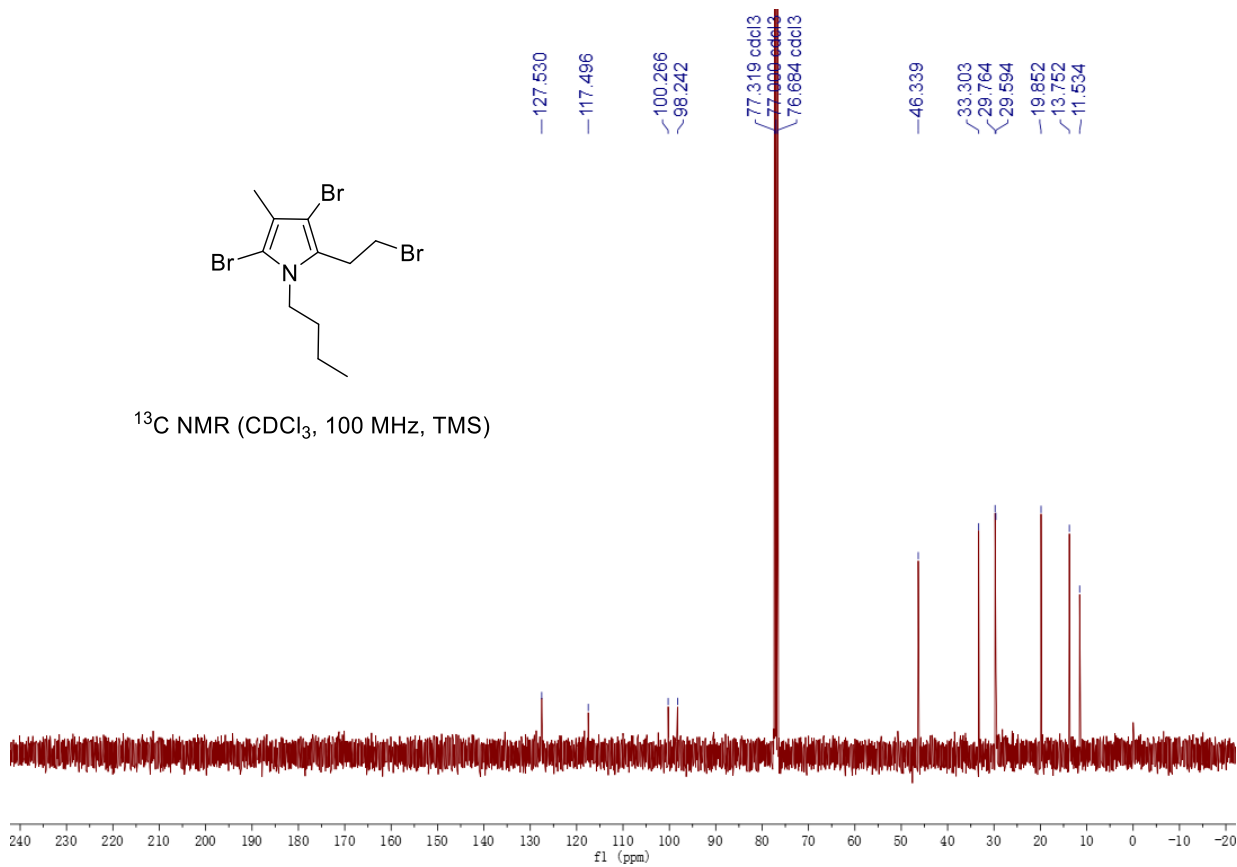

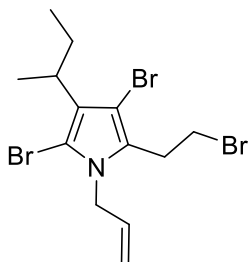

**1-allyl-2,4-dibromo-5-(2-bromoethyl)-3-(sec-butyl)-1H-pyrrole (4c)**

A colorless oil, 29.1 mg, 68% yield.  $^1\text{H}$  NMR ( $\text{CDCl}_3$ , TMS, 400 MHz)  $\delta$  5.93 - 5.79 (m, 1H), 5.17 (d,  $J = 10.4$  Hz, 1H), 4.74 (d,  $J = 17.1$  Hz, 1H), 4.57 (s, 2H), 3.40 (t,  $J = 8.1$  Hz, 2H), 3.13 (t,  $J = 8.1$  Hz, 2H), 2.83 - 2.68 (m, 1H), 1.90 - 1.73 (m, 1H), 1.66 - 1.56 (m, 1H), 1.27 (d,  $J = 7.2$  Hz, 3H), 0.79 (t,  $J = 7.4$  Hz, 3H).  $^{13}\text{C}$  NMR ( $\text{CDCl}_3$ , TMS, 100 MHz)  $\delta$  133.2, 128.6, 124.4, 116.5, 100.4, 97.1, 48.2, 34.5, 29.7, 29.6, 28.2, 19.3, 12.5. IR (Neat)  $\nu$  728, 905, 1147, 1376, 2918, 2950  $\text{cm}^{-1}$ . HRMS (ESI) calcd. for  $\text{C}_{13}\text{H}_{19}\text{Br}_3\text{N}$  ( $\text{M}+\text{H}$ ): 429.9026, Found: 429.9027.

5.910  
5.871  
5.819  
5.182  
5.156  
4.759  
4.717  
4.566  
3.419  
3.399  
3.379  
3.148  
3.127  
3.107  
2.803  
2.769  
2.752  
2.711  
1.871  
1.818  
1.798  
1.759  
1.654  
1.636  
1.601  
1.584  
1.284  
1.266  
0.813  
0.794  
0.776  
-0.000

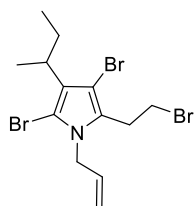

$^1\text{H}$  NMR ( $\text{CDCl}_3$ , 400 MHz, TMS)

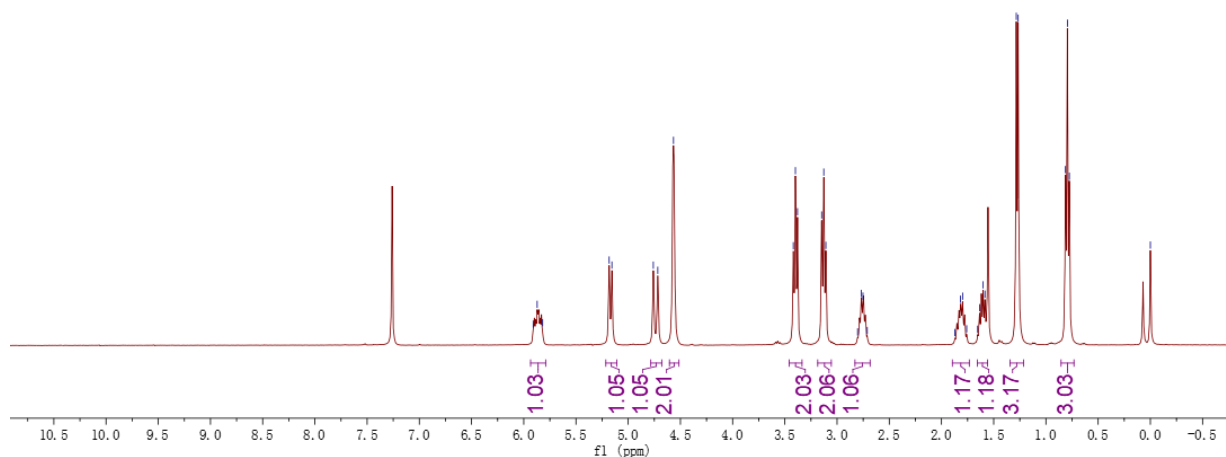

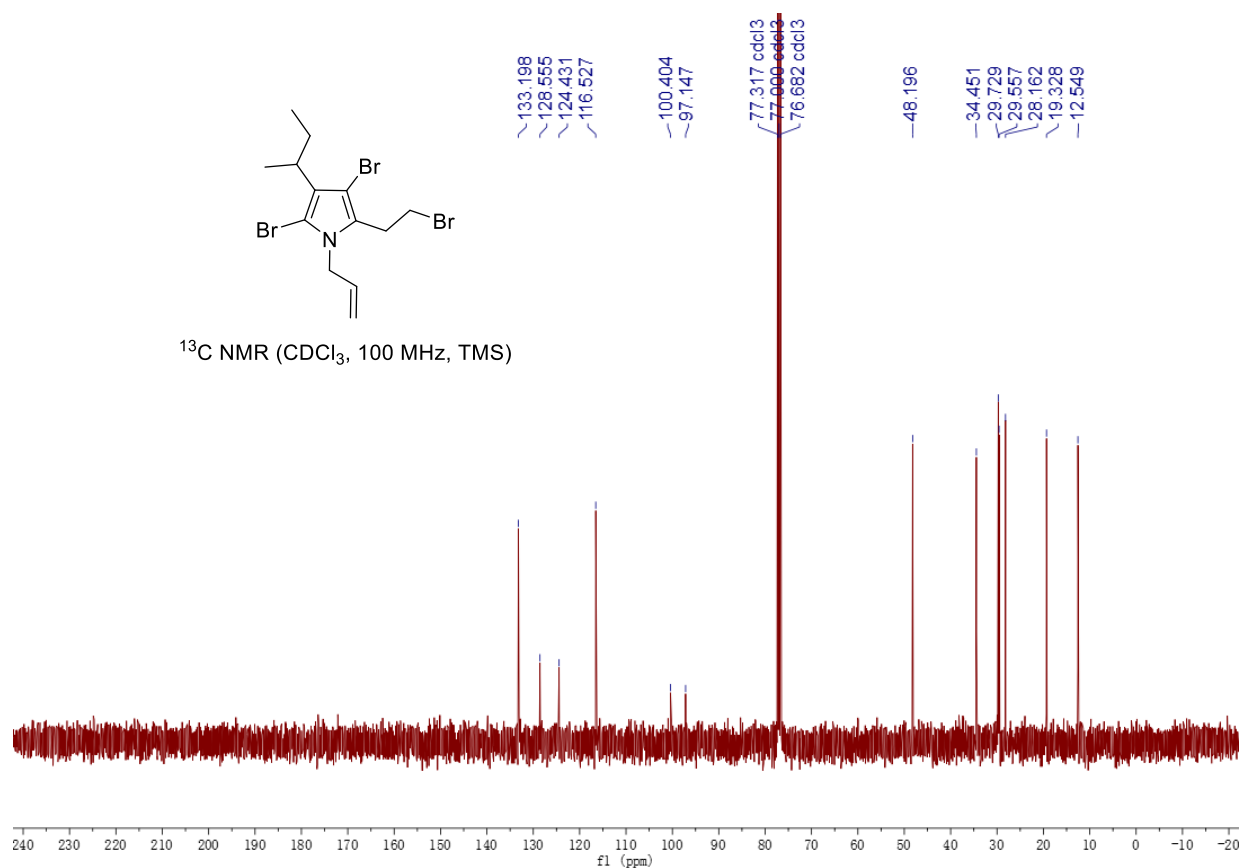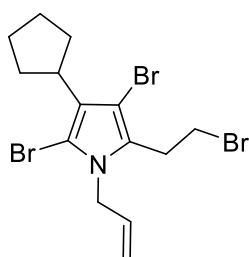

**1-allyl-2,4-dibromo-5-(2-bromoethyl)-3-cyclopentyl-1H-pyrrole (4d)**

A colorless oil, 28.6 mg, 65% yield. <sup>1</sup>H NMR (CDCl<sub>3</sub>, TMS, 400 MHz) δ 5.94 - 5.78 (m, 1H), 5.18 (d, *J* = 10.1 Hz, 1H), 4.84 (d, *J* = 17.1 Hz, 1H), 4.56 (s, 2H), 3.45 - 3.34 (m, 2H), 3.18 - 3.09 (m, 2H), 3.08 - 2.98 (m, 1H), 1.95 - 1.77 (m, 6H), 1.72 - 1.56 (m, 2H). <sup>13</sup>C NMR (CDCl<sub>3</sub>, TMS, 100 MHz) δ 133.2, 128.7, 123.3, 116.9, 100.3, 97.2, 48.3, 37.9, 31.3, 29.8, 29.4, 26.2. IR (Acetone) ν 759, 1023, 1120, 1433, 2921, 2930 cm<sup>-1</sup>. HRMS (ESI) calcd. for C<sub>14</sub>H<sub>19</sub>NBr<sub>3</sub> (M+H): 441.9023, Found: 441.9027.

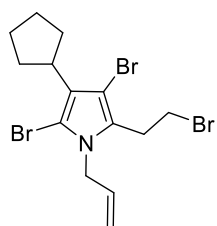

<sup>1</sup>H NMR (CDCl<sub>3</sub>, 400 MHz, TMS)

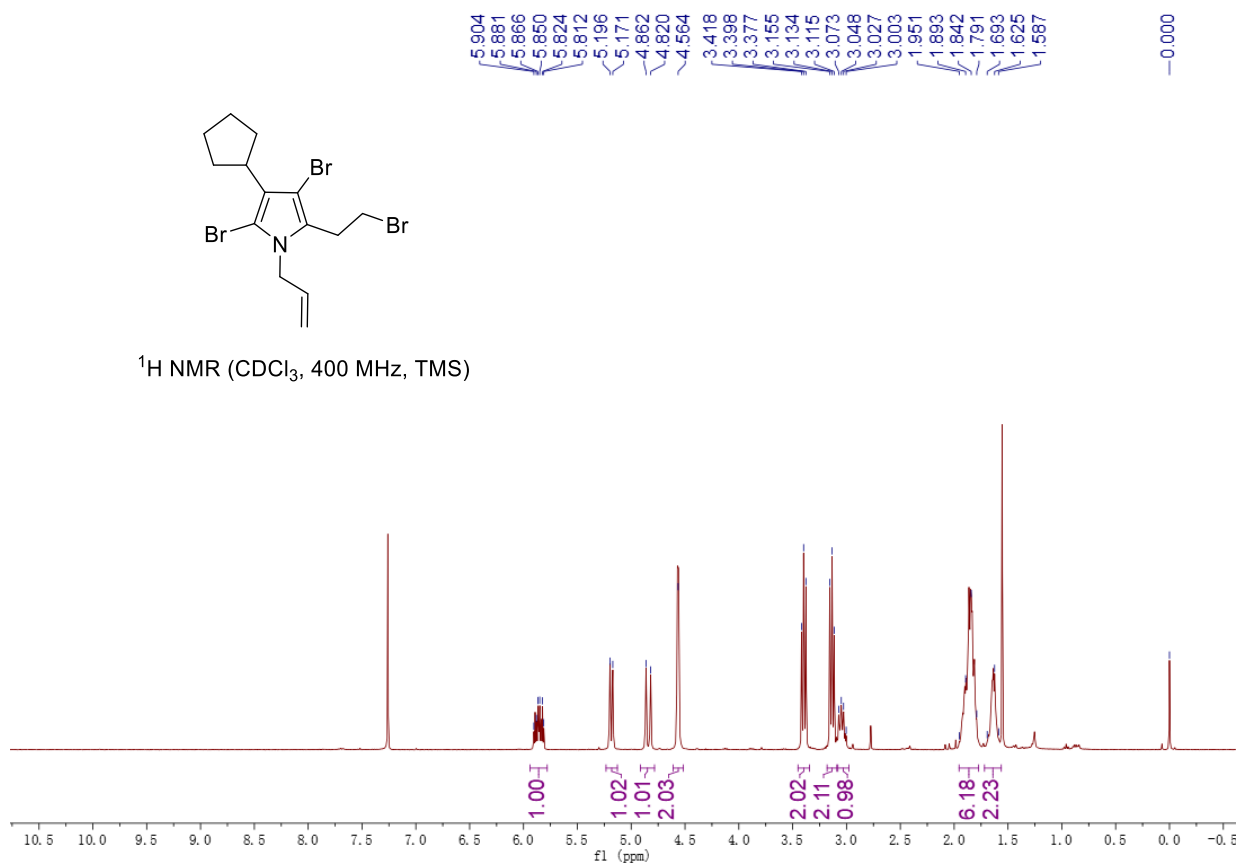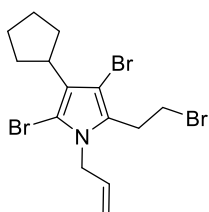

<sup>13</sup>C NMR (CDCl<sub>3</sub>, 100 MHz, TMS)

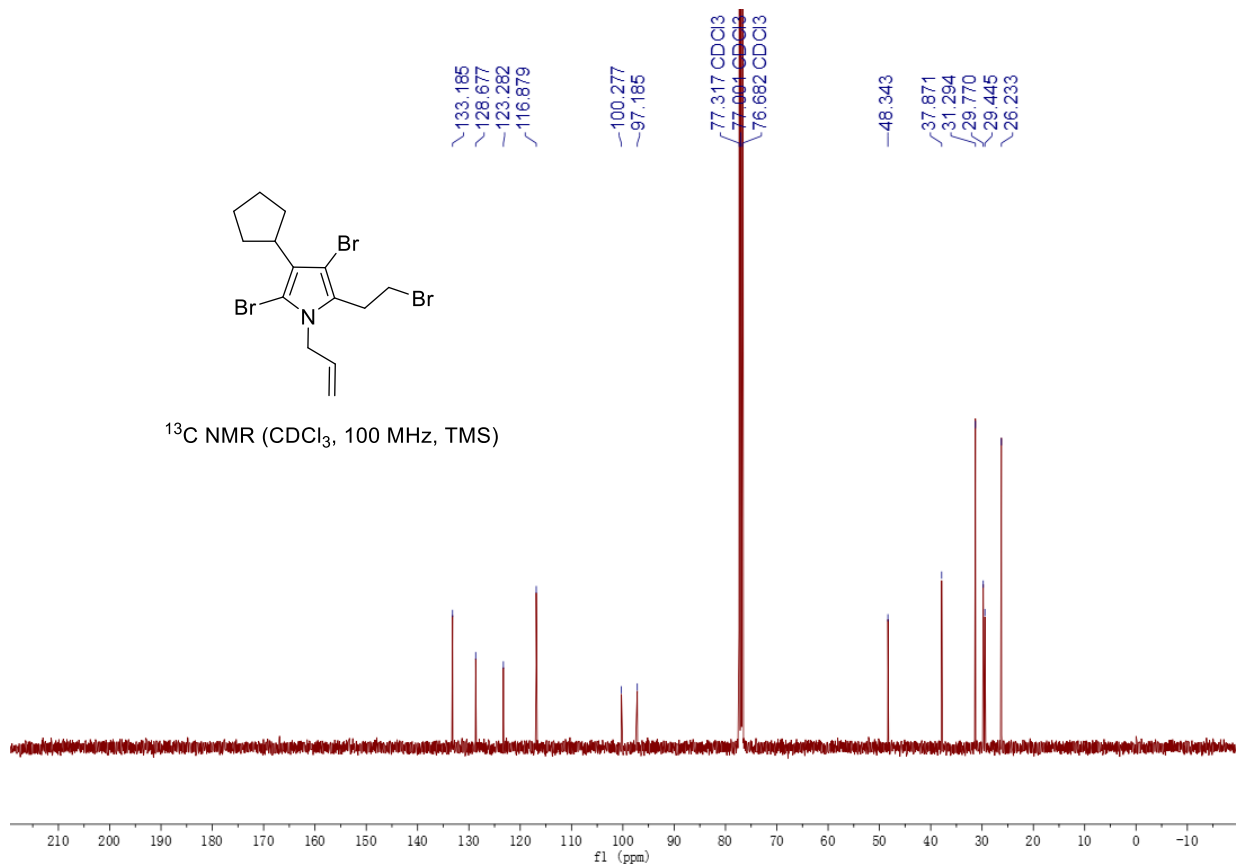

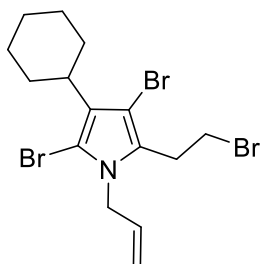

### 1-allyl-2,4-dibromo-5-(2-bromoethyl)-3-cyclohexyl-1H-pyrrole (4e)

A colorless oil, 26.3 mg, 58% yield.  $^1\text{H}$  NMR ( $\text{CDCl}_3$ , TMS, 400 MHz)  $\delta$  5.94 - 5.73 (m, 1H), 5.15 (d,  $J = 10.3$  Hz, 1H), 4.77 (d,  $J = 17.1$  Hz, 1H), 4.54 (s, 2H), 3.37 (t,  $J = 8.1$  Hz, 2H), 3.11 (t,  $J = 8.1$  Hz, 2H), 2.69 - 2.52 (m, 1H), 1.98 - 1.84 (m, 2H), 1.83 - 1.73 (m, 2H), 1.72 - 1.64 (m, 1H), 1.63 - 1.55 (m, 2H), 1.39 - 1.16 (m, 3H).  $^{13}\text{C}$  NMR ( $\text{CDCl}_3$ , TMS, 100 MHz)  $\delta$  133.2, 128.5, 125.3, 116.8, 99.8, 97.1, 48.3, 37.7, 30.9, 29.8, 29.5, 27.0, 26.0. IR (Neat)  $\nu$  699, 1021, 1129, 1448, 2931, 2950, 2977  $\text{cm}^{-1}$ . HRMS (ESI) calcd. for  $\text{C}_{15}\text{H}_{22}\text{NBr}_3$  ( $\text{M}+\text{H}$ ): 453.9204, Found: 453.9184.

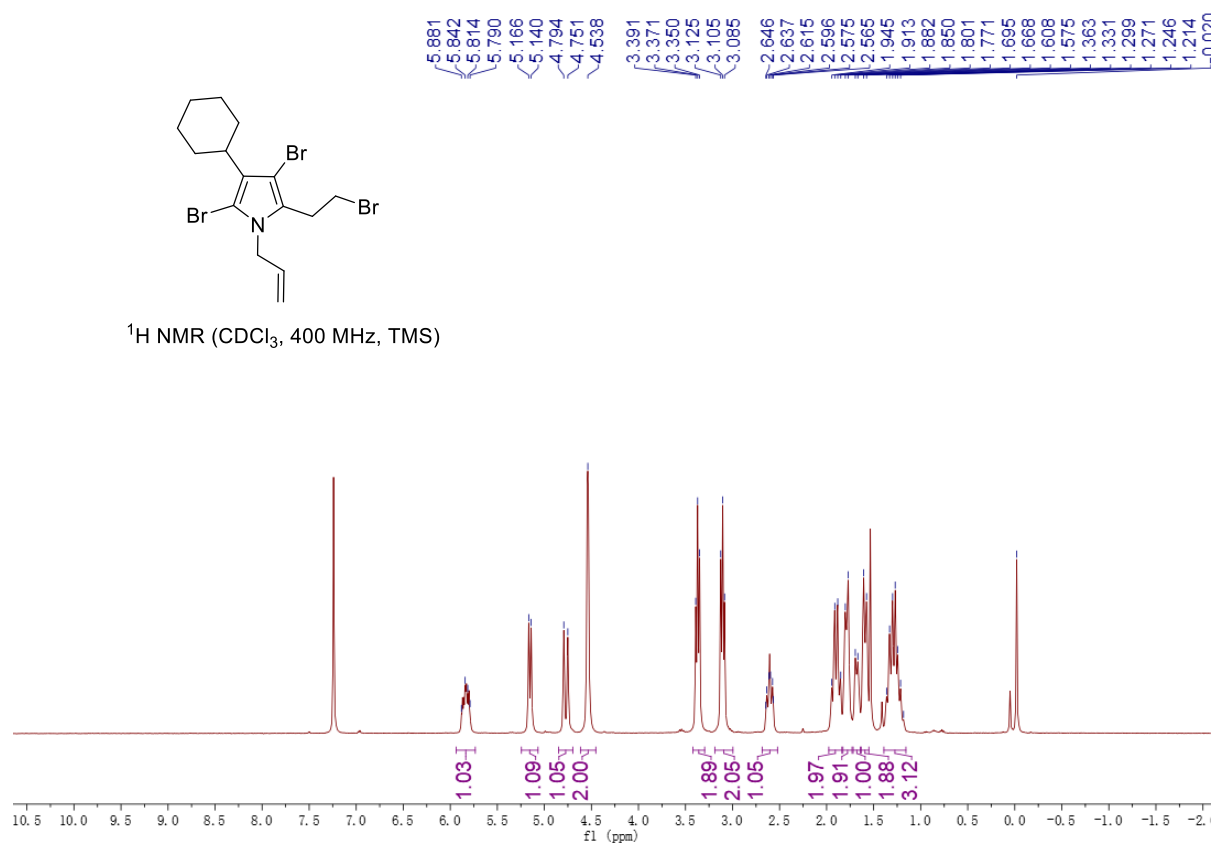

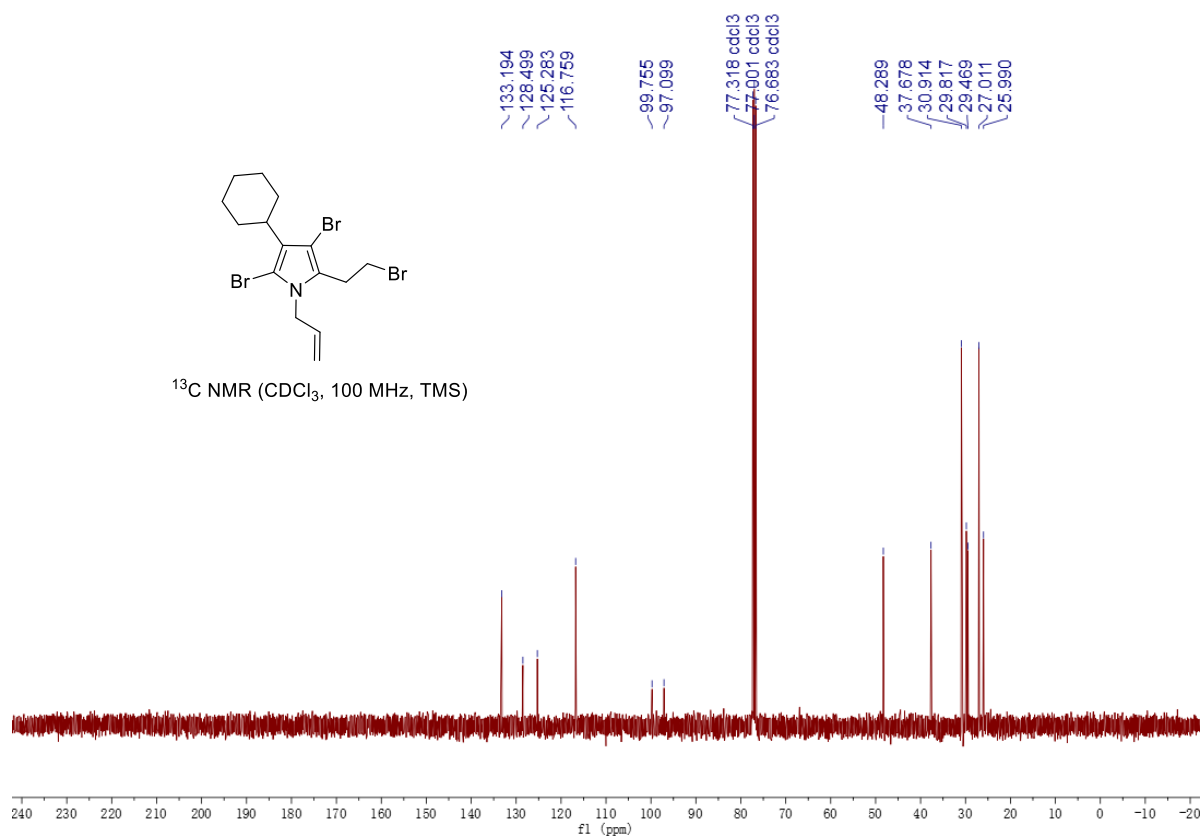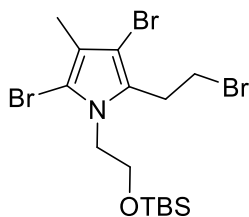

**2,4-dibromo-5-(2-bromoethyl)-1-(2-((tert-butyldimethylsilyloxy)ethyl)-3-methyl-1H-pyrrole (4f)**

A colorless oil, 36.8 mg, 73% yield. <sup>1</sup>H NMR (CDCl<sub>3</sub>, TMS, 400 MHz) δ 4.04 (t, *J* = 5.7 Hz, 2H), 3.77 (t, *J* = 5.8 Hz, 2H), 3.43 (t, *J* = 7.8 Hz, 2H), 3.24 (t, *J* = 7.9 Hz, 2H), 1.99 (s, 3H), 0.84 (s, 9H), -0.05 (s, 6H). <sup>13</sup>C NMR (CDCl<sub>3</sub>, TMS, 100 MHz) δ 129.1, 117.9, 99.8, 98.3, 62.4, 48.4, 29.8, 29.7, 25.8, 18.3, 11.5, -5.7. IR (Neat) ν 732, 1025, 1146, 1188, 1308, 1345, 1705, 2956 cm<sup>-1</sup>. HRMS (ESI) calcd. for C<sub>15</sub>H<sub>27</sub>NOSiBr<sub>3</sub> (M+H): 503.9392, Found: 503.9392.

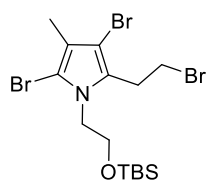

<sup>1</sup>H NMR (CDCl<sub>3</sub>, 400 MHz, TMS)

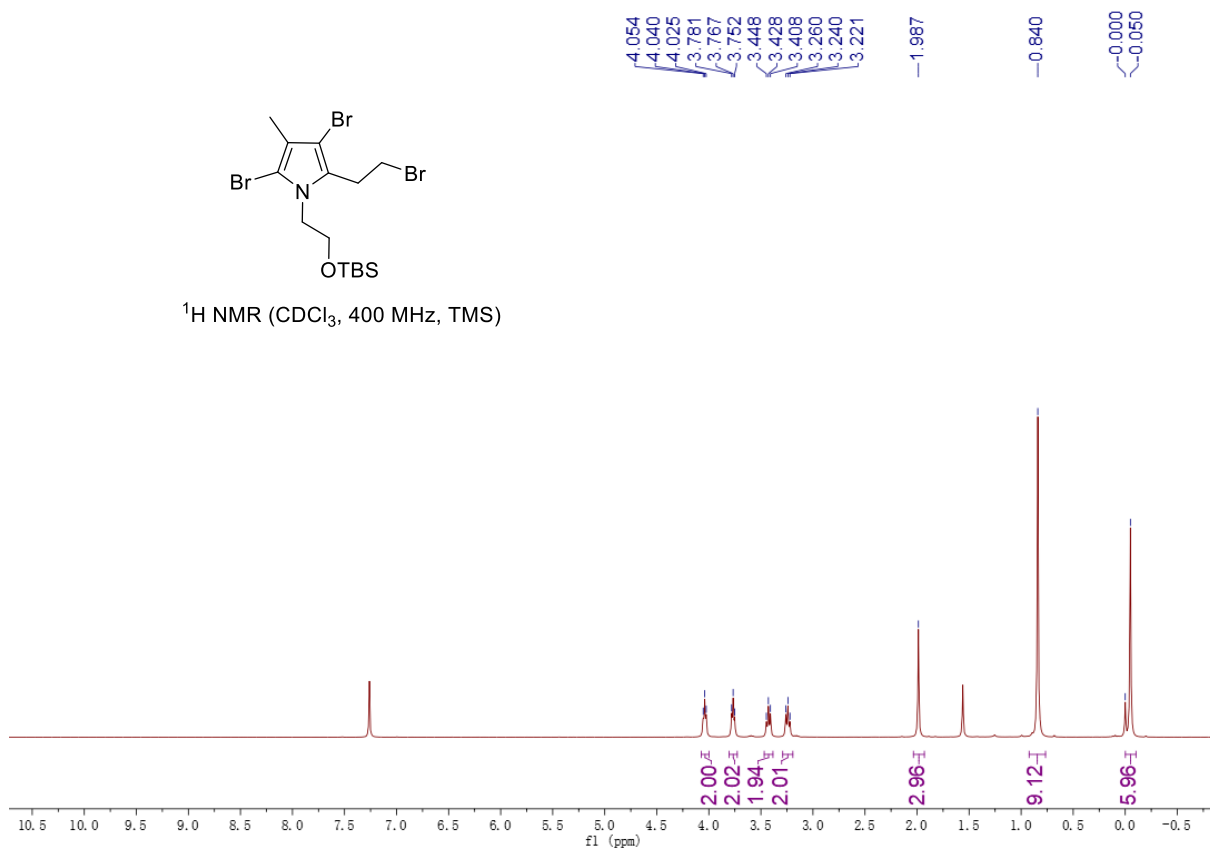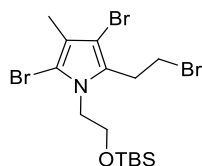

<sup>13</sup>C NMR (CDCl<sub>3</sub>, 100 MHz, TMS)

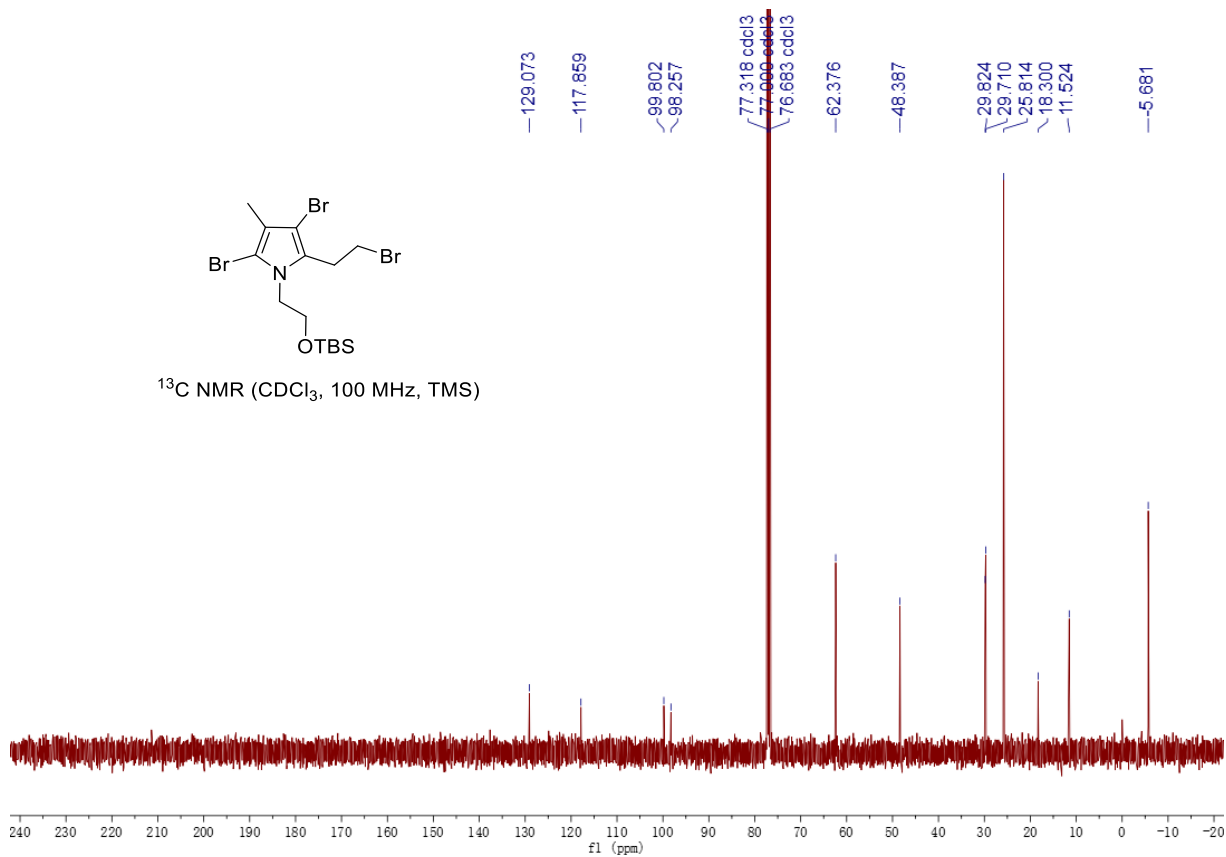

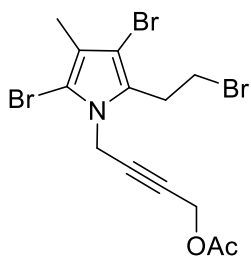

**4-(2,4-dibromo-5-(2-bromoethyl)-3-methyl-1H-pyrrol-1-yl)but-2-yn-1-yl acetate (4g)**

A colorless oil, 36.5 mg, 80% yield.  $^1\text{H}$  NMR ( $\text{CDCl}_3$ , TMS, 400 MHz)  $\delta$  4.77 (s, 2H), 4.66 (s, 2H), 3.50 (t,  $J = 7.9$  Hz, 2H), 3.24 (t,  $J = 7.9$  Hz, 2H), 2.10 (s, 3H), 2.00 (s, 3H).  $^{13}\text{C}$  NMR ( $\text{CDCl}_3$ , TMS, 100 MHz)  $\delta$  170.1, 128.1, 118.4, 100.5, 99.6, 80.5, 79.1, 51.9, 36.1, 29.8, 29.5, 20.7, 11.6. IR (Acetone)  $\nu$  730, 1047, 1165, 1203, 1444, 1760 1799, 2963  $\text{cm}^{-1}$ . HRMS (ESI) calcd. for  $\text{C}_{13}\text{H}_{15}\text{NO}_2\text{Br}_3$  ( $\text{M}+\text{H}$ ): 455.8632, Found: 455.8626.

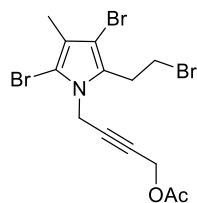

$^1\text{H}$  NMR ( $\text{CDCl}_3$ , 400 MHz, TMS)

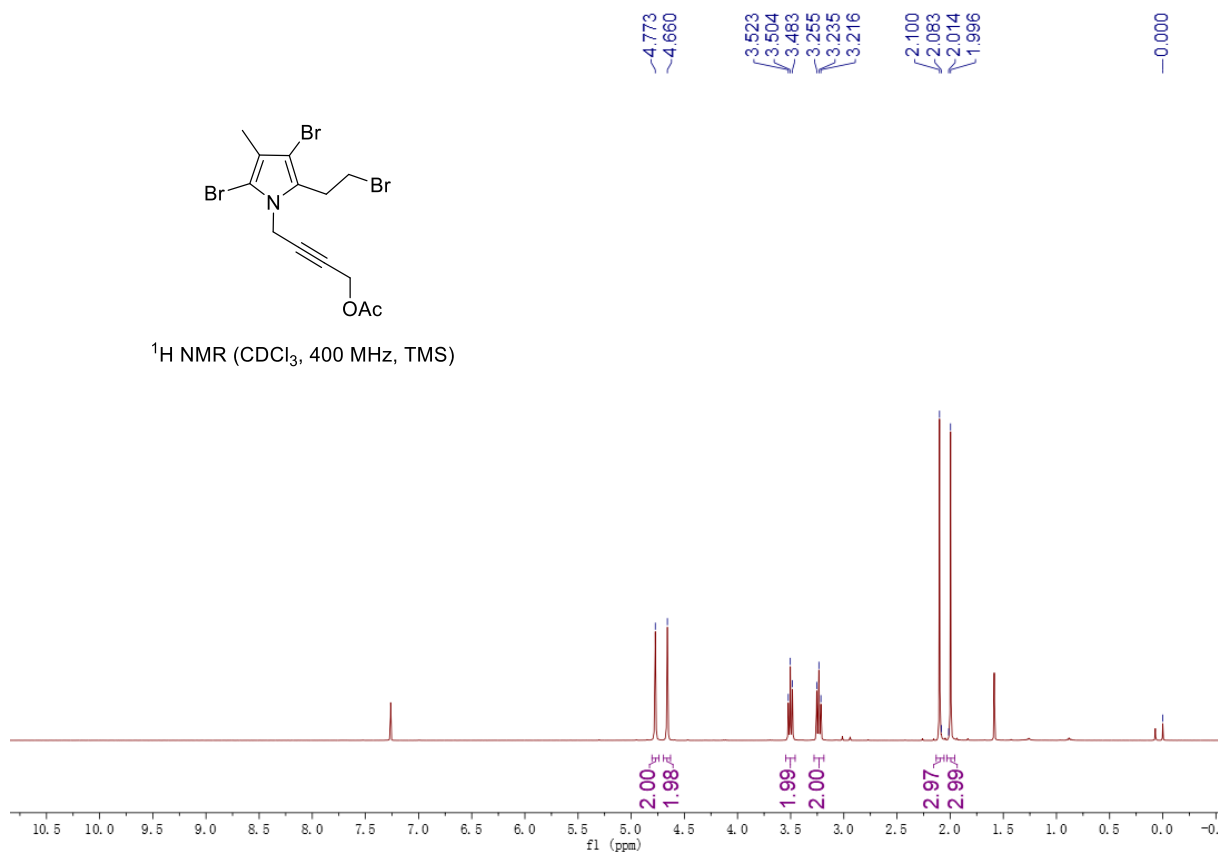



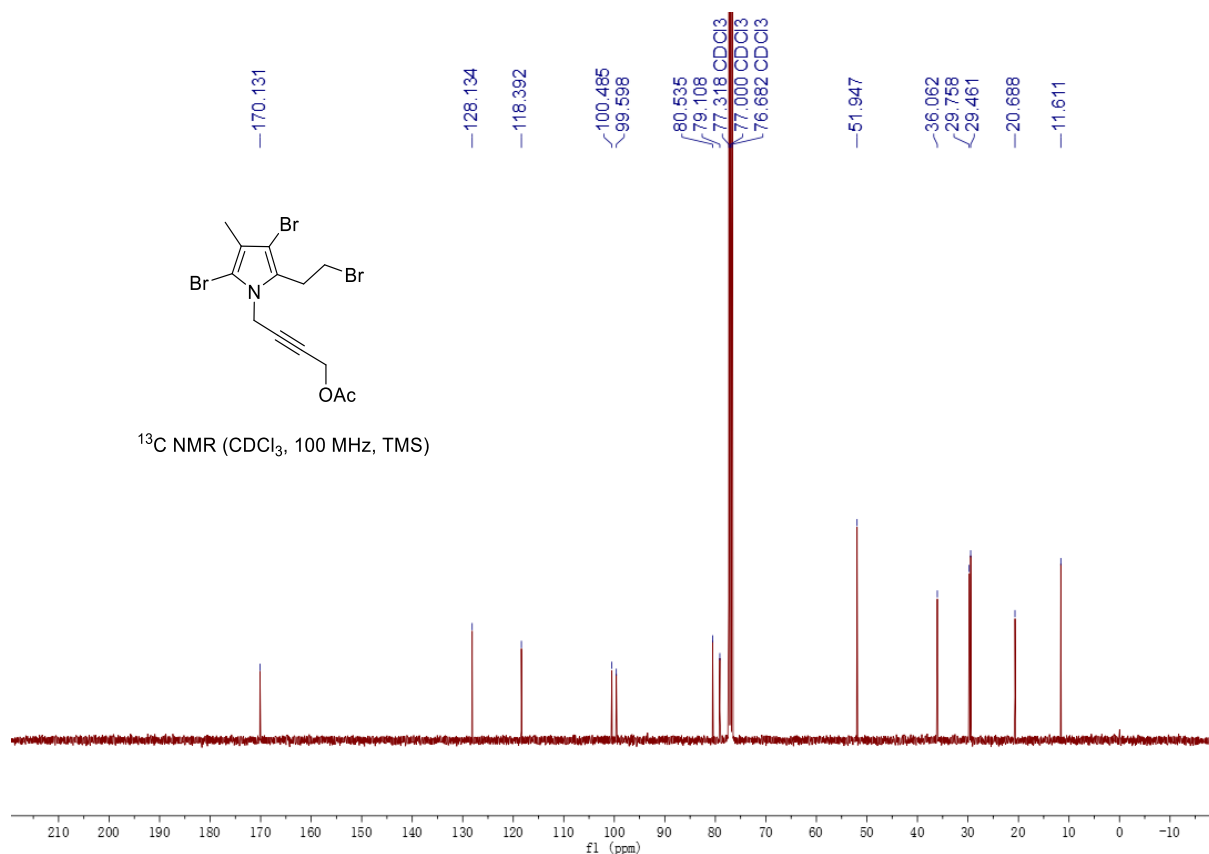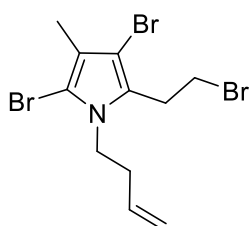

**2,4-dibromo-5-(2-bromoethyl)-1-(but-3-en-1-yl)-3-methyl-1H-pyrrole (4h)**

A colorless oil, 31.2 mg, 78% yield. <sup>1</sup>H NMR (CDCl<sub>3</sub>, TMS, 400 MHz) δ 5.82 - 5.65 (m, 1H), 5.17 - 5.04 (m, 2H), 3.95 (t, *J* = 7.7 Hz, 2H), 3.42 (t, *J* = 8.0 Hz, 2H), 3.15 (t, *J* = 8.0 Hz, 2H), 2.37 (q, *J* = 7.7 Hz, 2H), 1.98 (s, 3H). <sup>13</sup>C NMR (CDCl<sub>3</sub>, TMS, 100 MHz) δ 133.5, 127.7, 117.9, 117.8, 100.1, 98.4, 45.9, 35.2, 29.8, 29.6, 11.5. IR (Acetone) ν 2936, 2924, 2853, 1611, 1589, 1497, 1457, 1356, 1310, 1272, 1250, 1230, 1214, 1150, 1058, 1029, 959, 823, 788, 744, 700 cm<sup>-1</sup>. HRMS (ESI) calcd. for C<sub>13</sub>H<sub>21</sub>Br<sub>3</sub>N (M+H): 427.9224, Found: 427.9231.

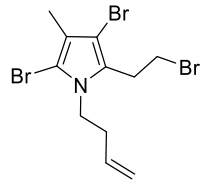

<sup>1</sup>H NMR (CDCl<sub>3</sub>, 400 MHz, TMS)

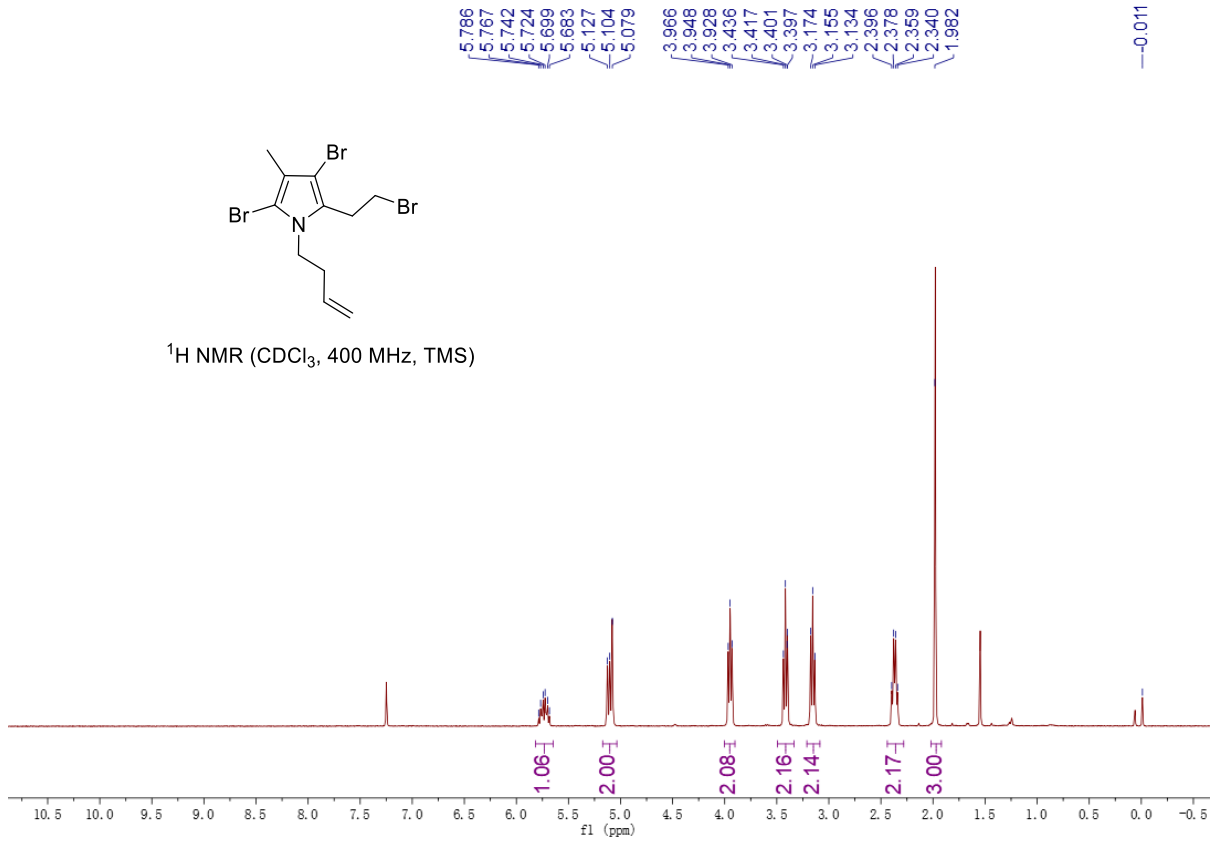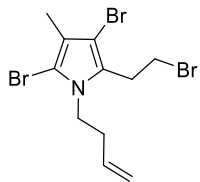

<sup>13</sup>C NMR (CDCl<sub>3</sub>, 100 MHz, TMS)

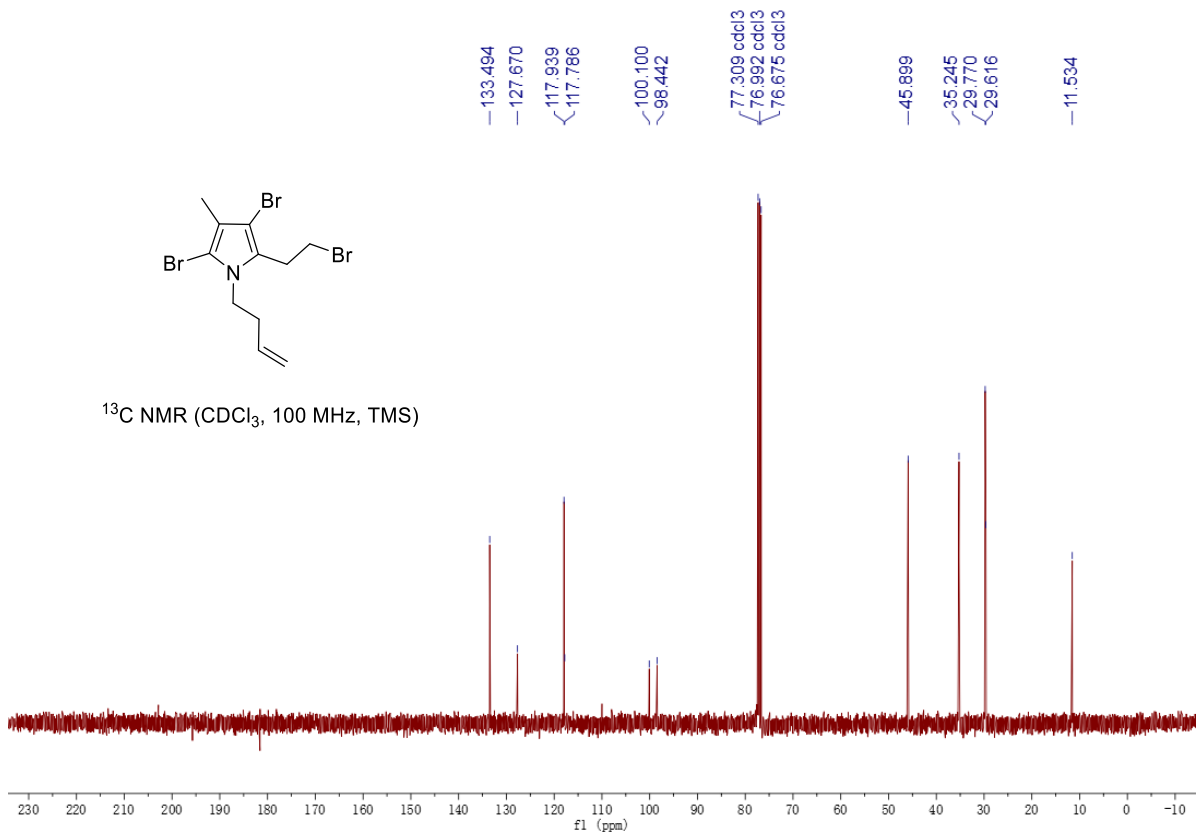

## 9. Spectroscopic data of products 6.

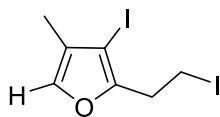

### 3-iodo-2-(2-iodoethyl)-4-methylfuran (6a)

A colorless oil, 27.5 mg, 76% yield.  $^1\text{H}$  NMR ( $\text{CDCl}_3$ , TMS, 400 MHz)  $\delta$  7.20 (s, 1H), 3.38 - 3.29 (m, 2H), 3.27 - 3.20 (m, 2H), 1.94 (s, 3H).  $^{13}\text{C}$  NMR ( $\text{CDCl}_3$ , TMS, 100 MHz)  $\delta$  154.3, 138.1, 123.8, 71.4, 32.3, 11.3, 0.7. IR (Acetone)  $\nu$  2936, 2924, 2853, 1611, 1589, 1497, 1457, 1356, 1310, 1272, 1250, 1230, 1214, 1150, 1058, 1029, 959, 823, 788, 744, 700  $\text{cm}^{-1}$ . HRMS (ESI) calcd. for  $\text{C}_7\text{H}_8\text{I}_2\text{ONa}$  ( $\text{M}+\text{Na}$ ): 384.8562, Found: 384.8673.

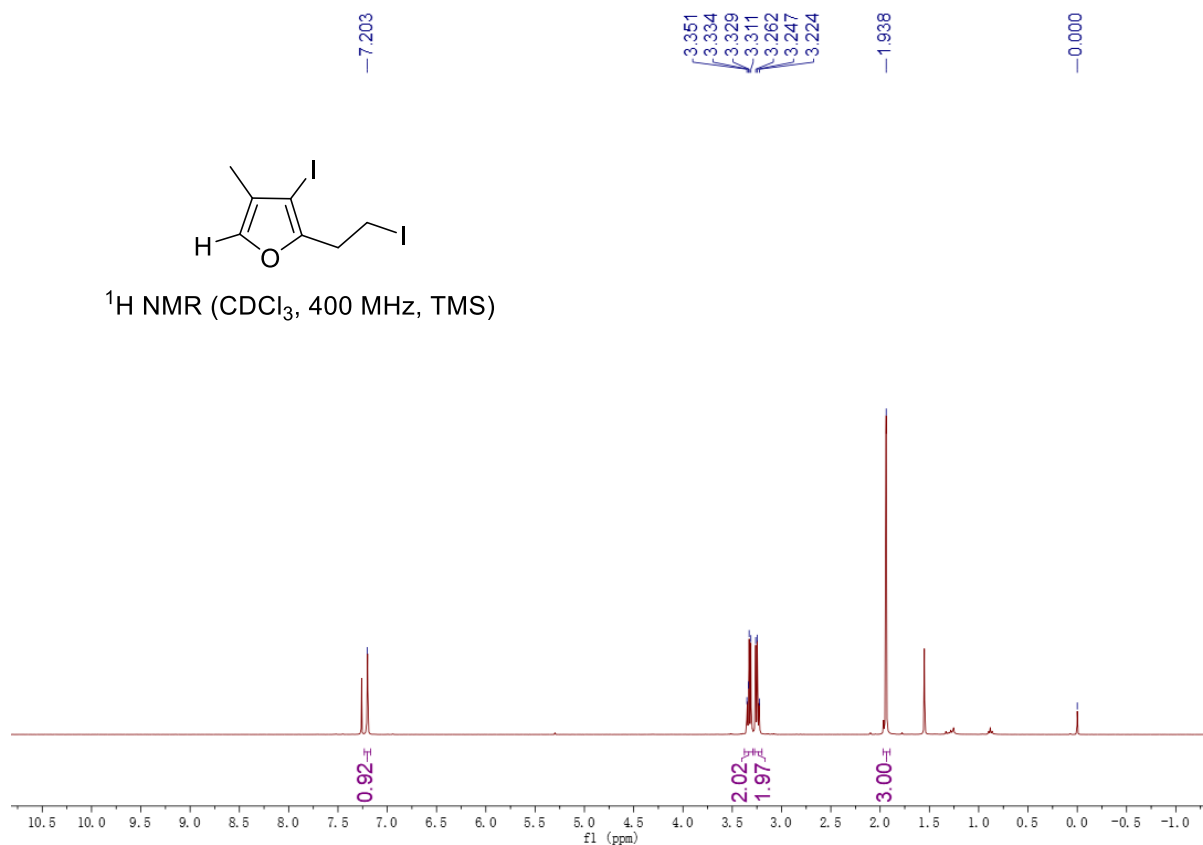

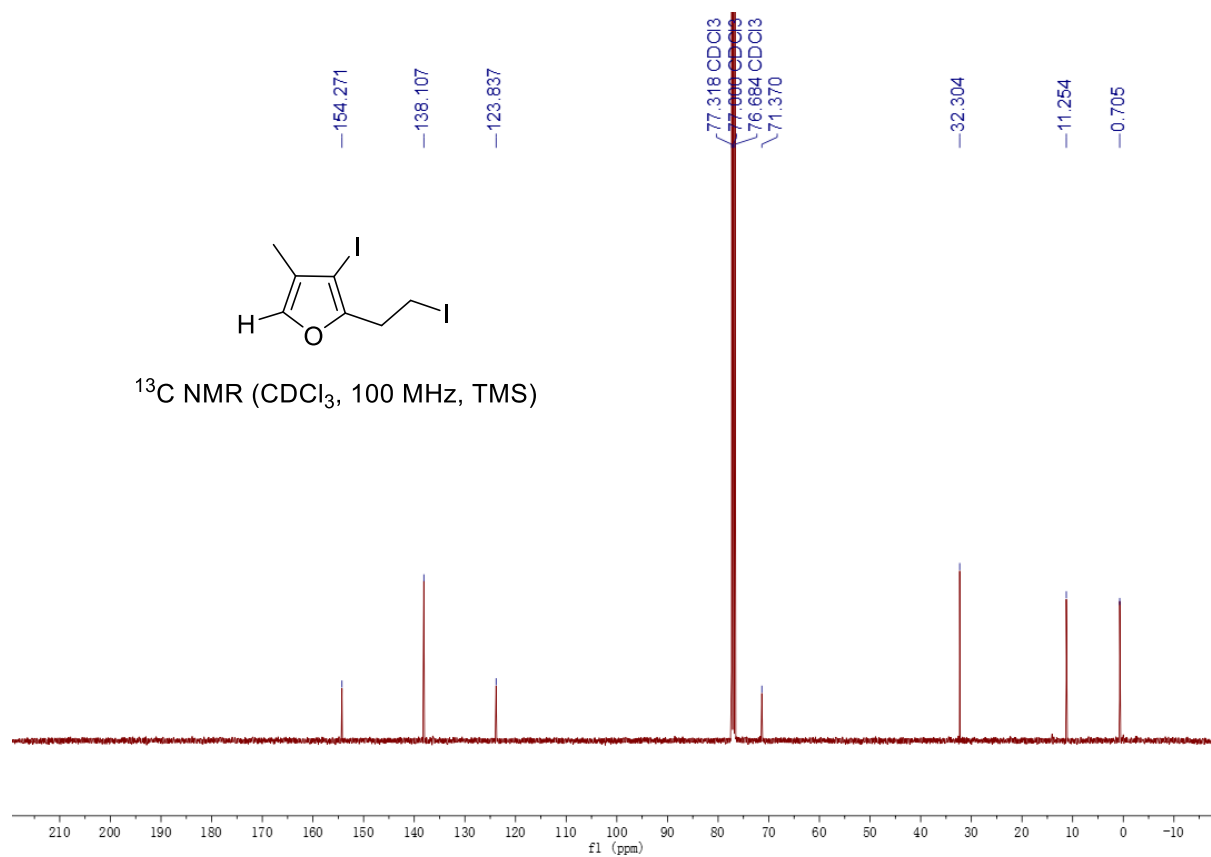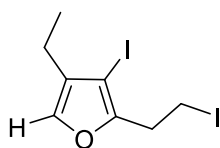

#### 4-ethyl-3-iodo-2-(2-iodoethyl)furan (6b)

A colorless oil, 27.1 mg, 72% yield.  $^1\text{H}$  NMR (CDCl<sub>3</sub>, TMS, 600 MHz)  $\delta$  7.16 (s, 1H), 3.35 - 3.31 (m, 2H), 3.27 - 3.23 (m, 2H), 2.33 (q,  $J = 7.5$  Hz, 2H), 1.18 (t,  $J = 7.5$  Hz, 3H).  $^{13}\text{C}$  NMR (CDCl<sub>3</sub>, TMS, 150 MHz)  $\delta$  154.3, 137.7, 129.9, 70.1, 32.2, 29.7, 19.8, 13.2, 0.7. IR (Acetone)  $\nu$  2972, 2929, 2892, 1735, 1484, 1247, 1086, 1044, 879  $\text{cm}^{-1}$ . HRMS (ESI) calcd. for C<sub>8</sub>H<sub>11</sub>I<sub>2</sub>O (M+H): 376.8899, Found: 376.8912.

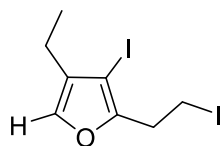

<sup>1</sup>H NMR (CDCl<sub>3</sub>, 600 MHz, TMS)

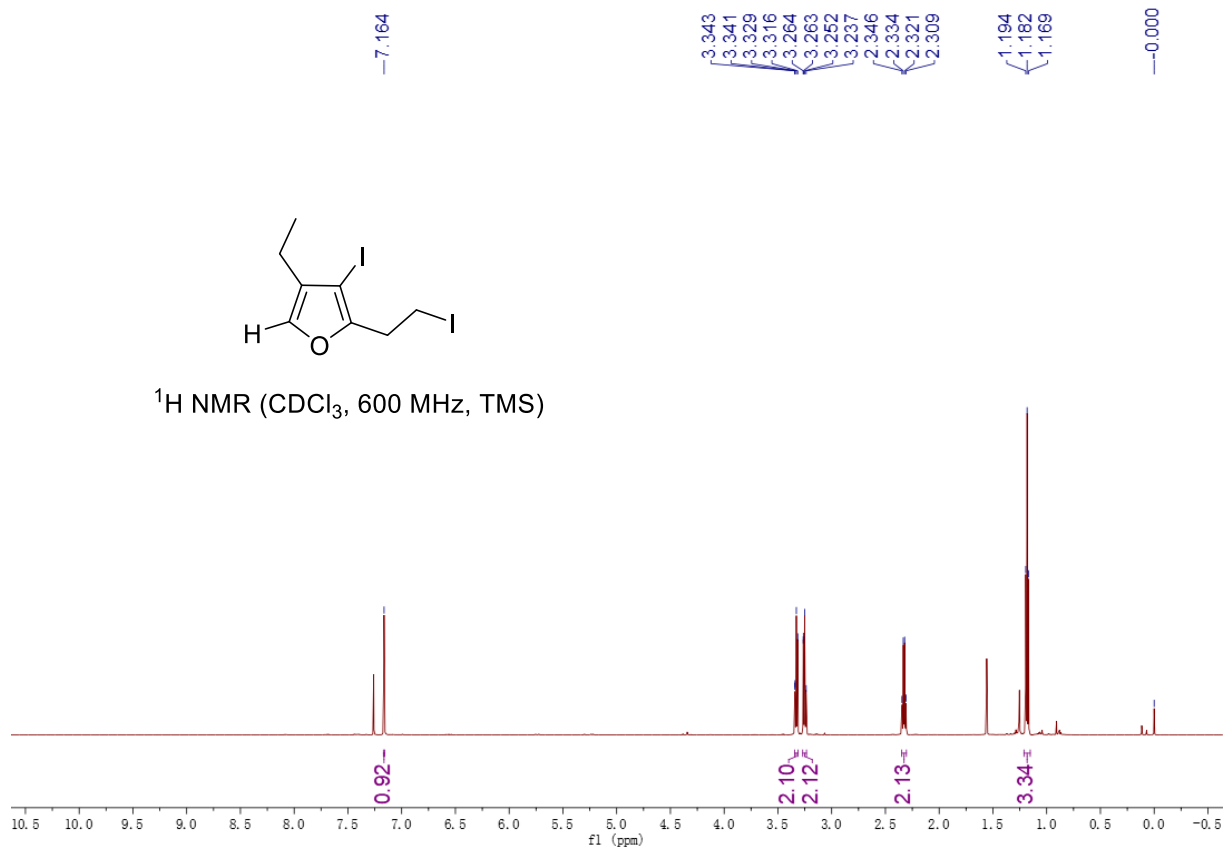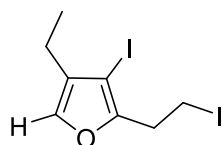

<sup>13</sup>C NMR (CDCl<sub>3</sub>, 150 MHz, TMS)

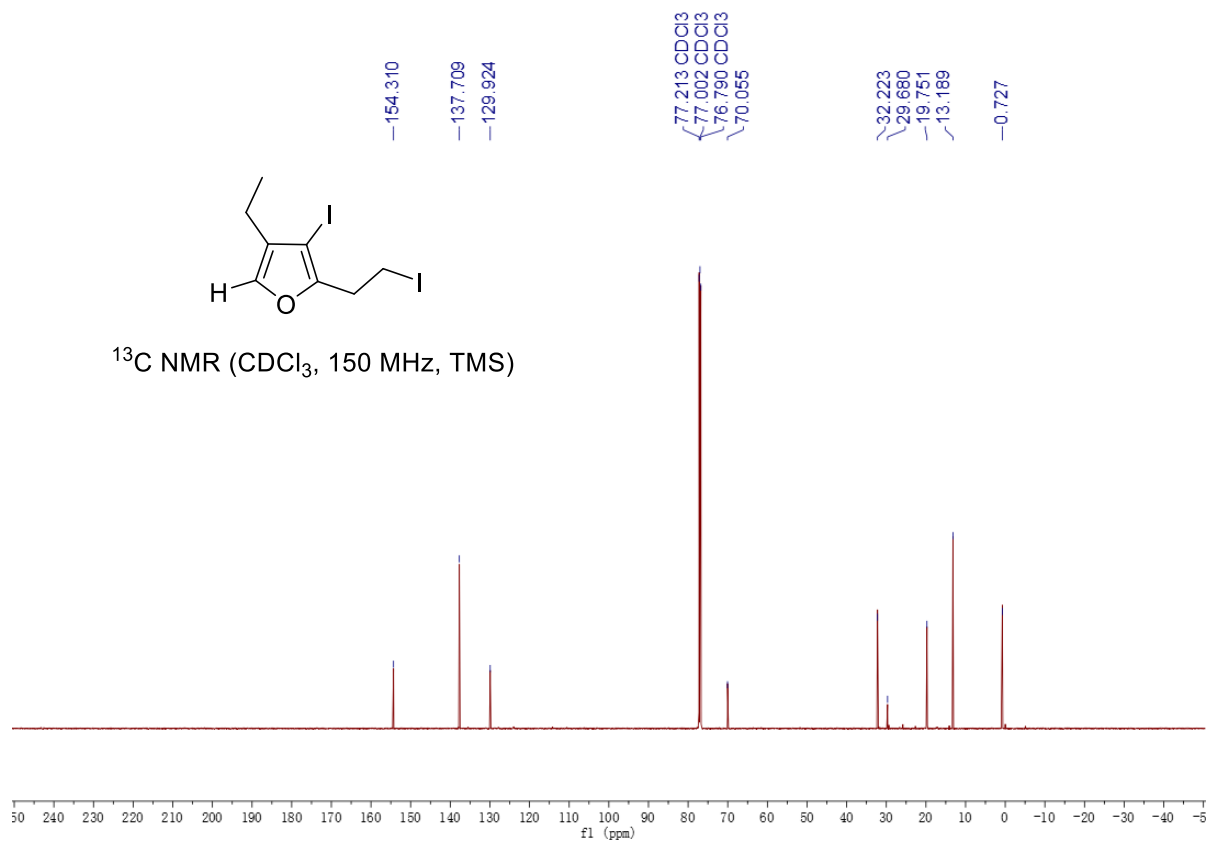

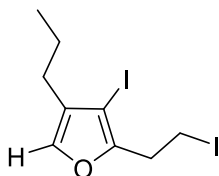

### 3-iodo-2-(2-iodoethyl)-4-propylfuran (6c)

A colorless oil, 27.3 mg, 70% yield  $^1\text{H}$  NMR ( $\text{CDCl}_3$ , TMS, 600 MHz)  $\delta$  7.16 (s, 1H), 3.35 - 3.31 (m, 2H), 3.27 - 3.23 (m, 2H), 2.28 (t,  $J = 7.6$  Hz, 2H), 1.61 - 1.56 (m, 2H), 0.96 (t,  $J = 7.3$  Hz, 3H).  $^{13}\text{C}$  NMR ( $\text{CDCl}_3$ , TMS, 150 MHz)  $\delta$  154.2, 138.1, 128.0, 70.4, 32.2, 28.2, 22.0, 13.8, 0.8. IR (Acetone)  $\nu$  2958, 2890, 1735, 1462, 1445, 1362, 1342, 1243, 1035, 904, 811  $\text{cm}^{-1}$ . HRMS (ESI) calcd. for  $\text{C}_9\text{H}_{12}\text{I}_2\text{ONa}$  ( $\text{M}+\text{Na}$ ): 412.8875, Found: 412.8903.

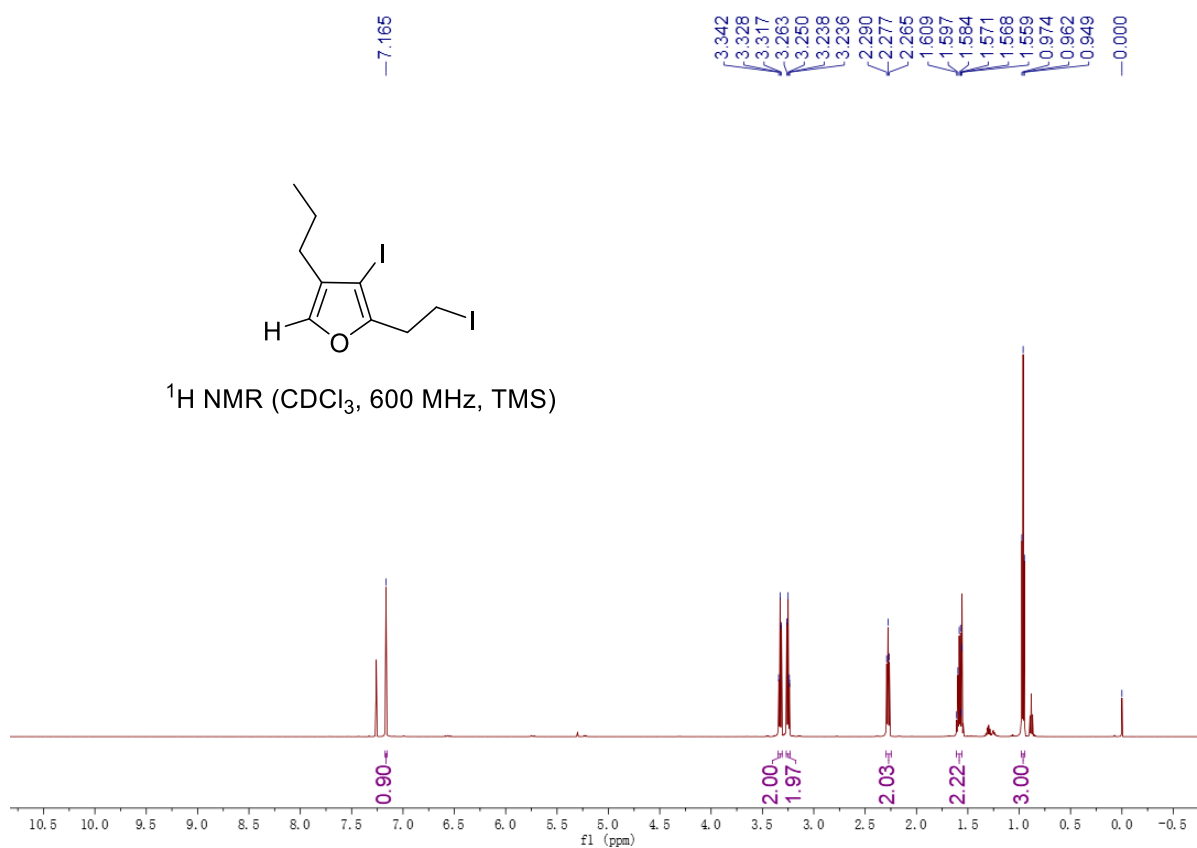

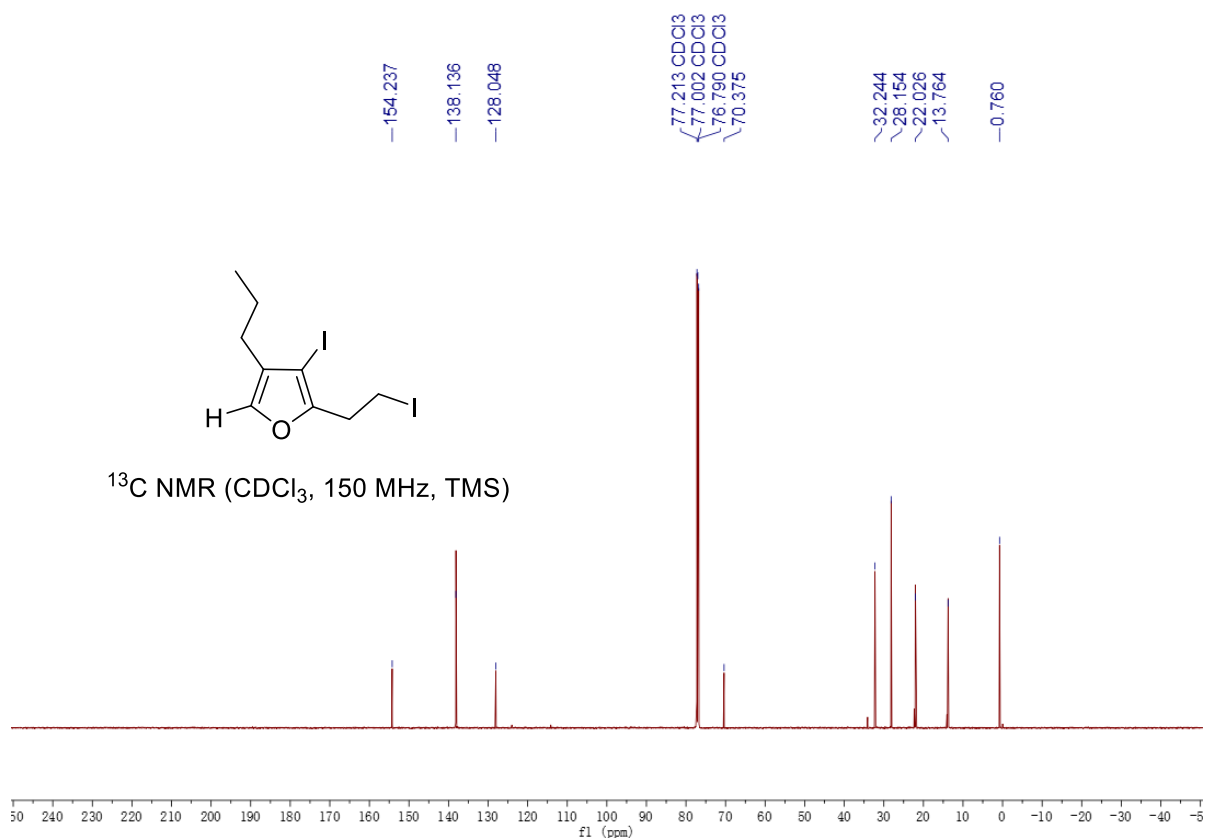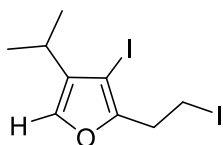

**3-iodo-2-(2-iodoethyl)-4-isopropylfuran (6d)**

A colorless oil, 25.7 mg, 66% yield. <sup>1</sup>H NMR (CDCl<sub>3</sub>, TMS, 600 MHz) δ 7.14 (s, 1H), 3.34 - 3.31 (m, 2H), 3.27 - 3.23 (m, 2H), 2.66 - 2.60 (m, 1H), 1.22 (s, 3H), 1.20 (s, 3H). <sup>13</sup>C NMR (CDCl<sub>3</sub>, TMS, 150 MHz) δ 154.4, 137.0, 134.5, 69.2, 32.3, 26.6, 22.4, 0.6. IR (Acetone) ν 2969, 2890, 1734, 1458, 1341, 1240, 1035, 896, 809 764, 736 cm<sup>-1</sup>. HRMS (ESI) calcd. for C<sub>9</sub>H<sub>13</sub>I<sub>2</sub>O (M+H): 390.9065, Found: 390.9143.

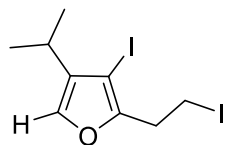

<sup>1</sup>H NMR (CDCl<sub>3</sub>, 600 MHz, TMS)

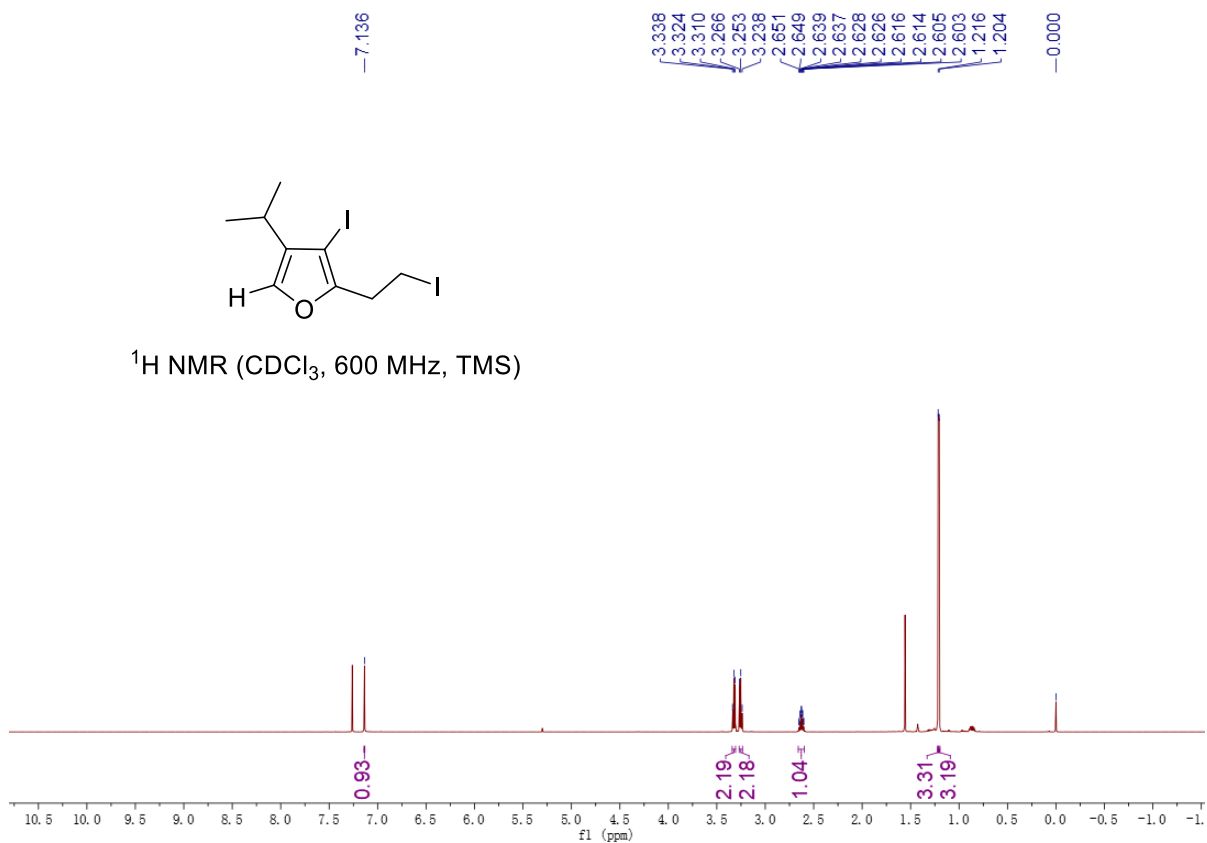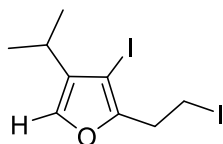

<sup>13</sup>C NMR (CDCl<sub>3</sub>, 150 MHz, TMS)

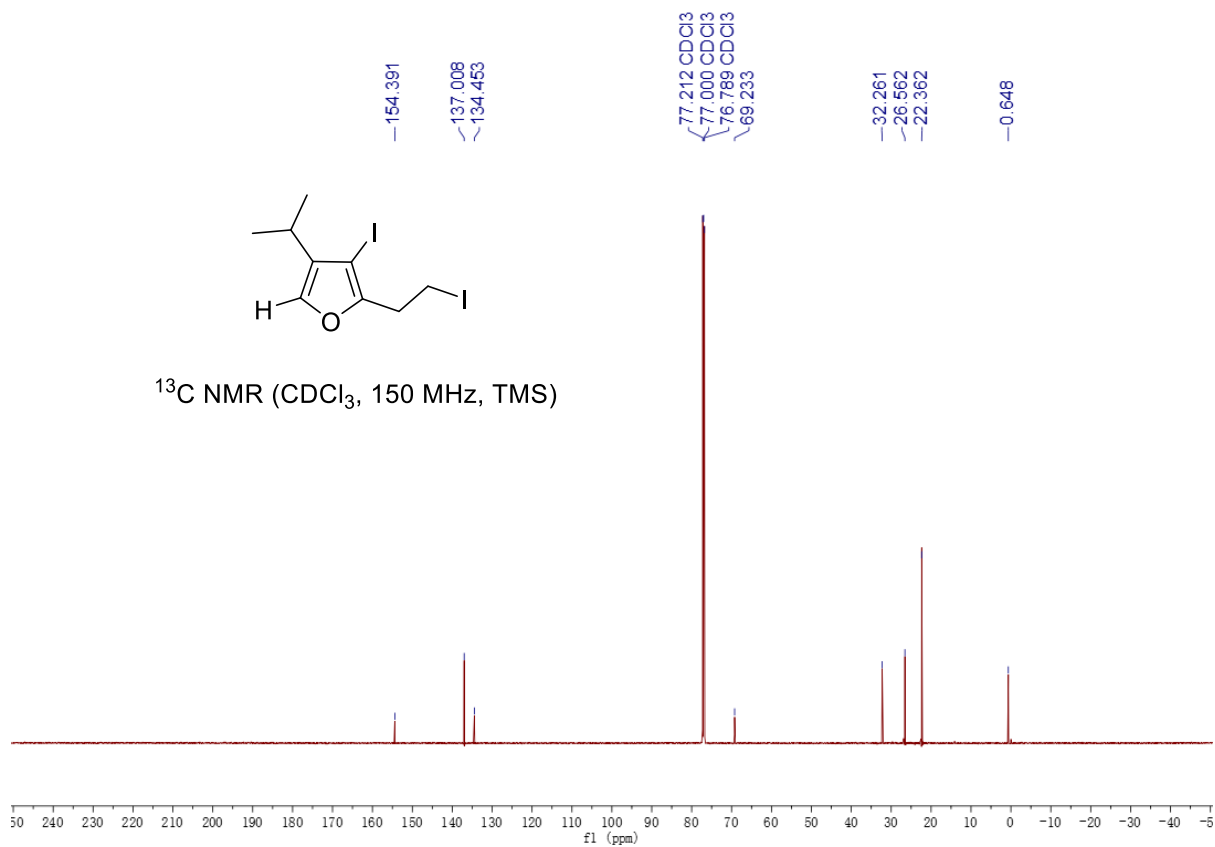



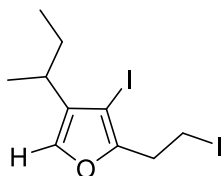

#### 4-(sec-butyl)-3-iodo-2-(2-iodoethyl)furan (6e)

A colorless oil, 27.5 mg, 68% yield.  $^1\text{H}$  NMR ( $\text{CDCl}_3$ , TMS, 600 MHz)  $\delta$  7.11 (s, 1H), 3.34 - 3.31 (m, 2H), 3.27 - 3.24 (m, 2H), 2.46 - 2.39 (m, 1H), 1.70 - 1.63 (m, 1H), 1.51 - 1.43 (m, 1H), 1.18 (d,  $J = 6.9$  Hz, 3H), 0.90 (t,  $J = 7.4$  Hz, 3H).  $^{13}\text{C}$  NMR ( $\text{CDCl}_3$ , TMS, 150 MHz)  $\delta$  154.2, 137.6, 133.1, 69.7, 33.1, 32.3, 29.2, 19.7, 11.6, 0.7. IR (Acetone)  $\nu$  3021, 2960, 2919, 1735, 1456, 1445, 1361, 1342, 1243, 1035, 807, 770  $\text{cm}^{-1}$ . HRMS (ESI) calcd. for  $\text{C}_{10}\text{H}_{15}\text{I}_2\text{O}$  ( $\text{M}+\text{H}$ ): 404.9212, Found: 404.9352.

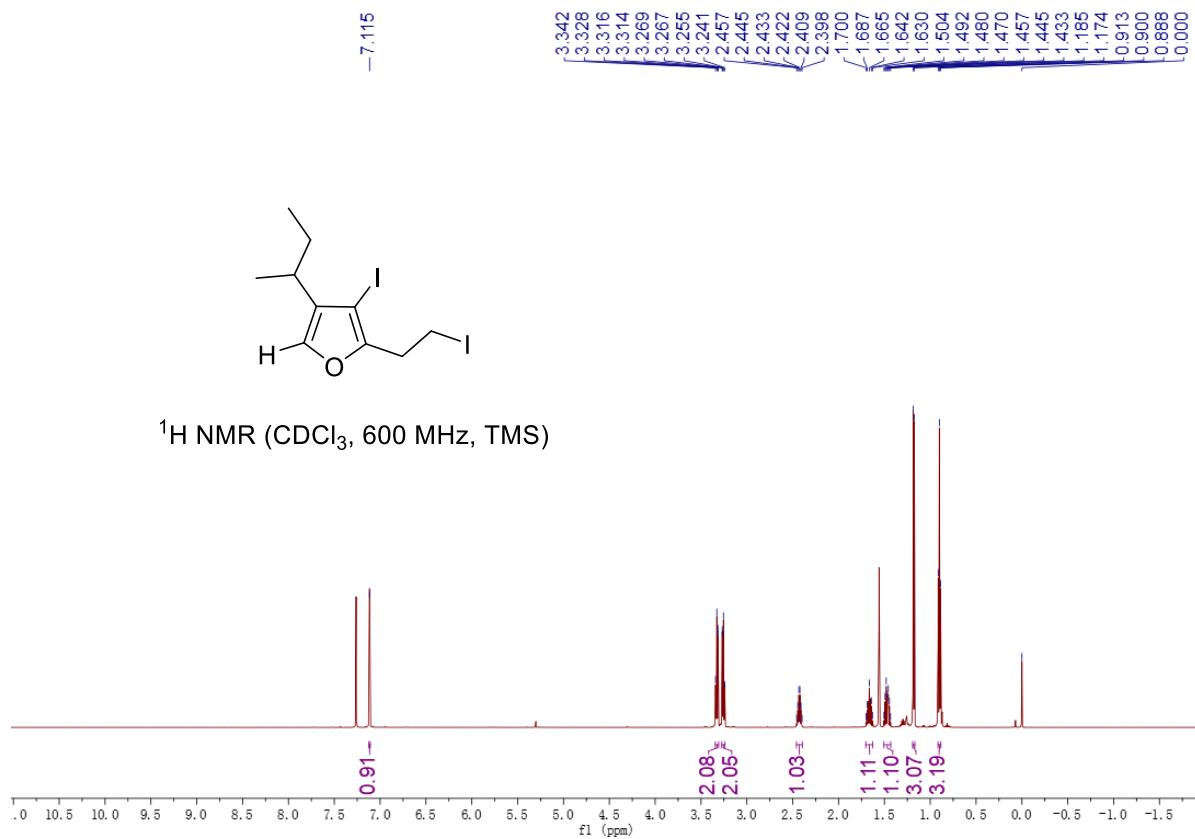

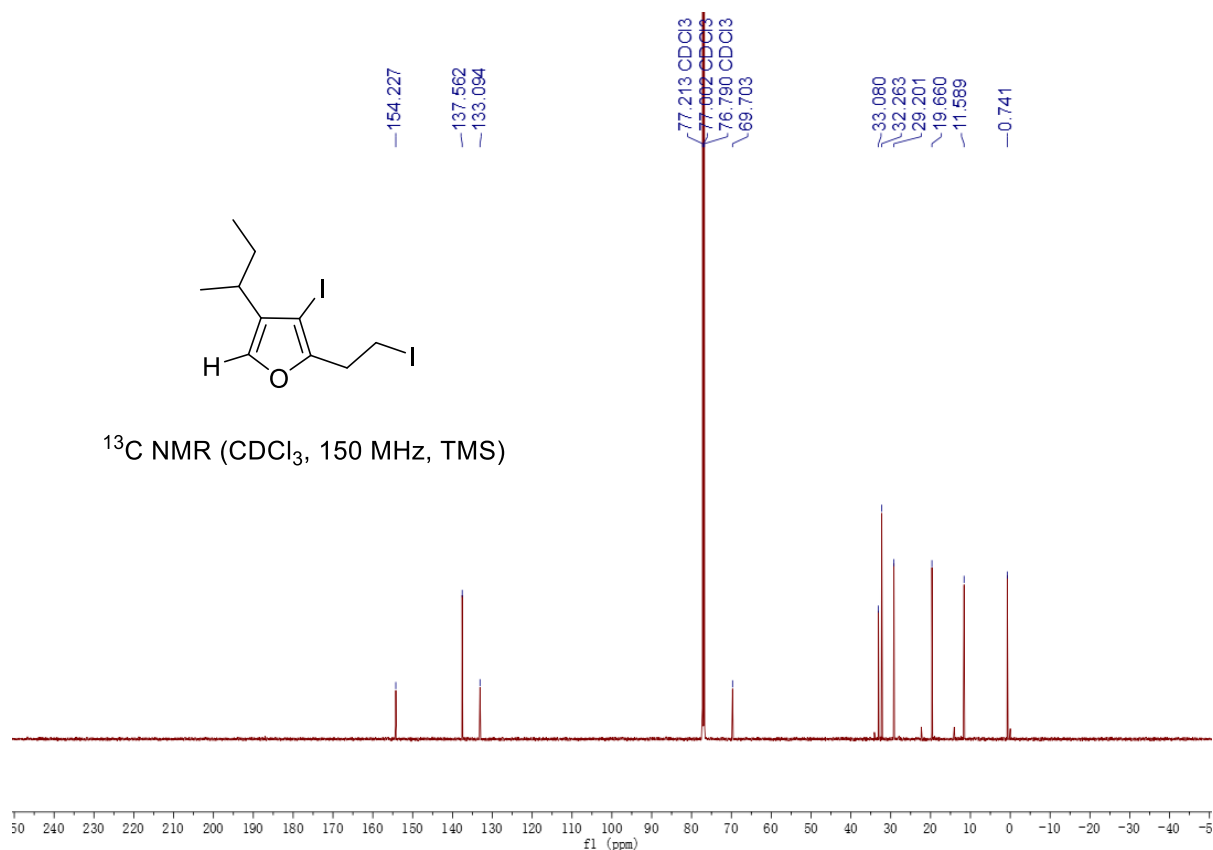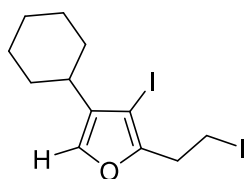

#### 4-cyclohexyl-3-iodo-2-(2-iodoethyl)furan (**6f**)

A colorless oil, 71.1 mg, 65% yield. <sup>1</sup>H NMR (CDCl<sub>3</sub>, TMS, 600 MHz) δ 7.11 (s, 1H), 3.33 - 3.30 (m, 2H), 3.27 - 3.23 (m, 2H), 2.24 (tt, *J* = 11.8, 3.4 Hz, 1H), 2.01-1.94 (m, 2H), 1.83 - 1.75 (m, 2H), 1.76 - 1.71 (m, 1H), 1.42 - 1.33 (m, 2H), 1.26 - 1.18 (m, 3H). <sup>13</sup>C NMR (CDCl<sub>3</sub>, TMS, 150 MHz) δ 154.1, 137.2, 133.5, 69.3, 36.2, 33.0, 32.3, 26.4, 26.1, 0.7. IR (Acetone) ν 2936, 2924, 2853, 1611, 1589, 1497, 1457, 1356, 1250, 1230, 1214, 1029, 959, 823, 788, 744, 700 cm<sup>-1</sup>. HRMS (ESI) calcd. for C<sub>12</sub>H<sub>16</sub>I<sub>2</sub>ONa (M+Na): 452.9188, Found: 452.9236.

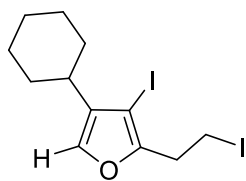

<sup>1</sup>H NMR (CDCl<sub>3</sub>, 600 MHz, TMS)

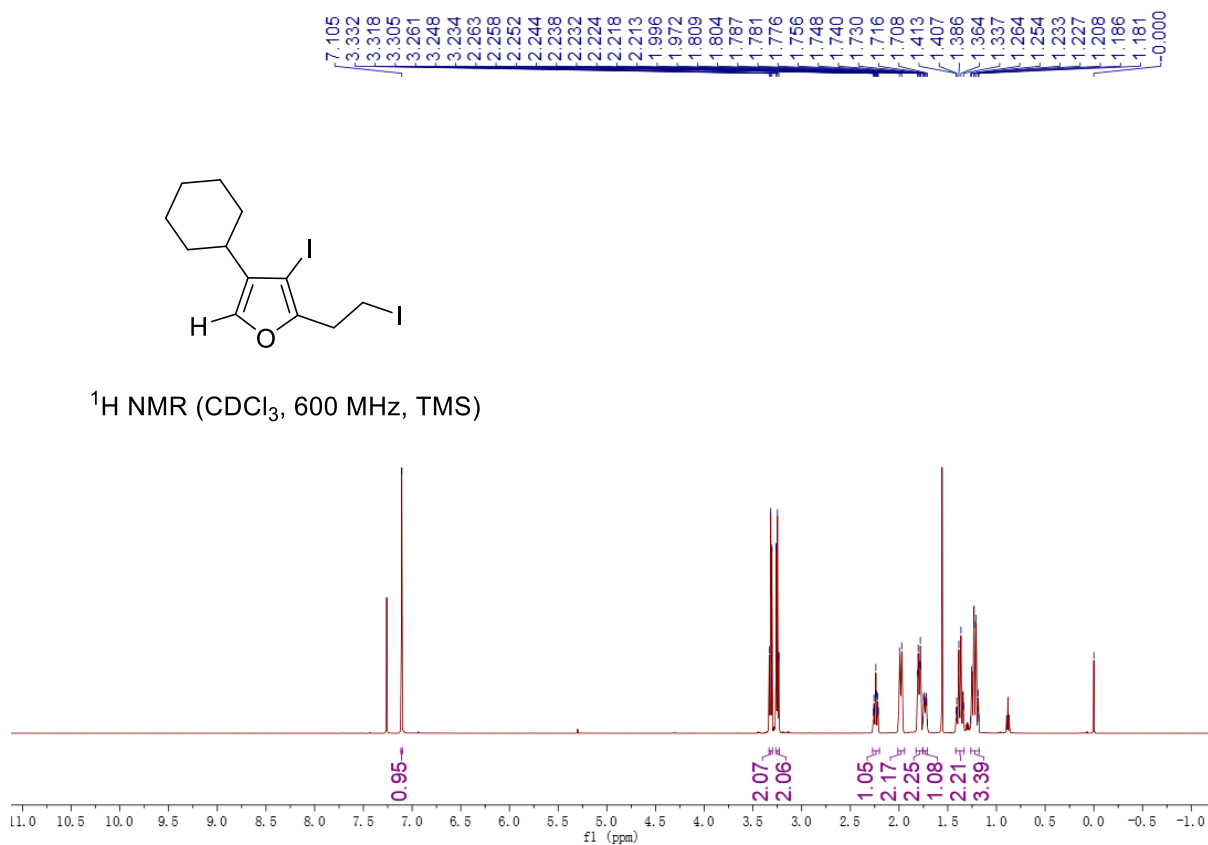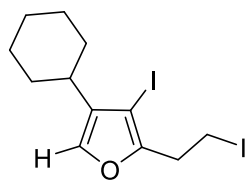

<sup>13</sup>C NMR (CDCl<sub>3</sub>, 150 MHz, TMS)

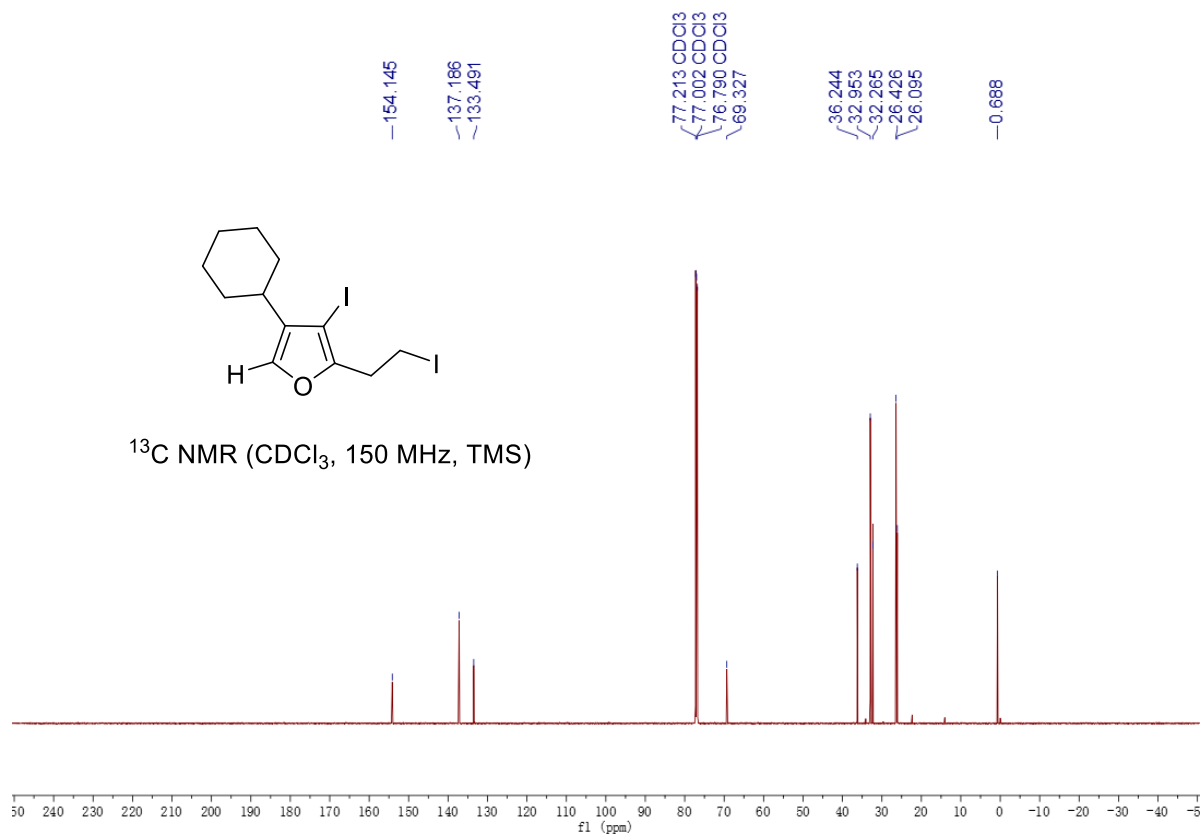

## 9. Spectroscopic data of products 8.

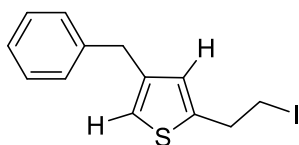

### 4-benzyl-2-(2-iodoethyl)thiophene (8a)

A colorless oil, 27.9 mg, 85% yield.  $^1\text{H}$  NMR ( $\text{CDCl}_3$ , TMS, 600 MHz)  $\delta$  7.22 (t,  $J = 7.5$  Hz, 2H), 7.13 (dd,  $J = 12.5, 7.2$  Hz, 3H), 6.69 (s, 1H), 6.58 (s, 1H), 3.83 (s, 2H), 3.26 - 3.19 (m, 4H).  $^{13}\text{C}$  NMR ( $\text{CDCl}_3$ , TMS, 150 MHz)  $\delta$  143.4, 141.4, 140.3, 128.7, 128.4, 126.8, 126.2, 119.8, 36.7, 34.6, 4.8. IR (Acetone)  $\nu$  927, 961, 1245, 1730, 1978, 2027, 2174, 2920  $\text{cm}^{-1}$ . HRMS (EI) calcd. for  $\text{C}_{13}\text{H}_{13}\text{IS}$  ( $\text{M}^+$ ): 327.9785, Found: 327.9777.

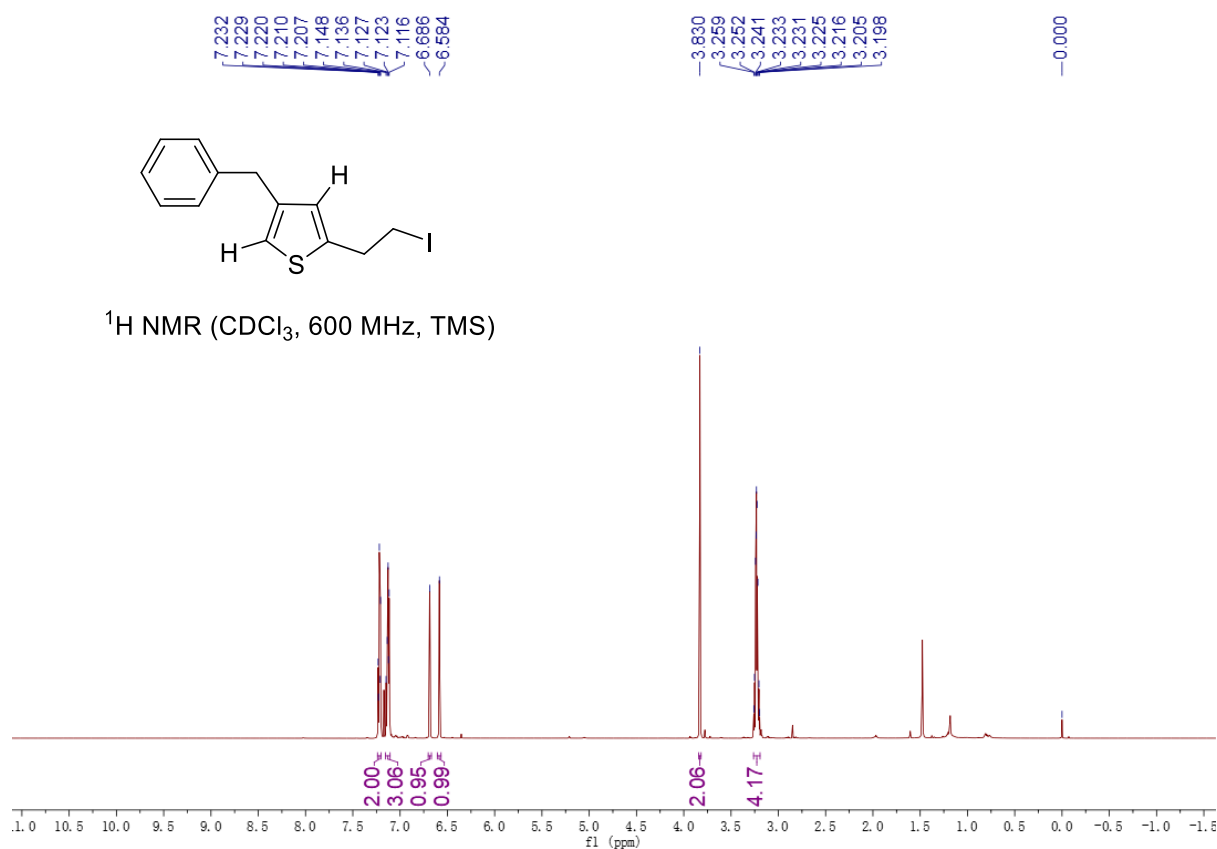

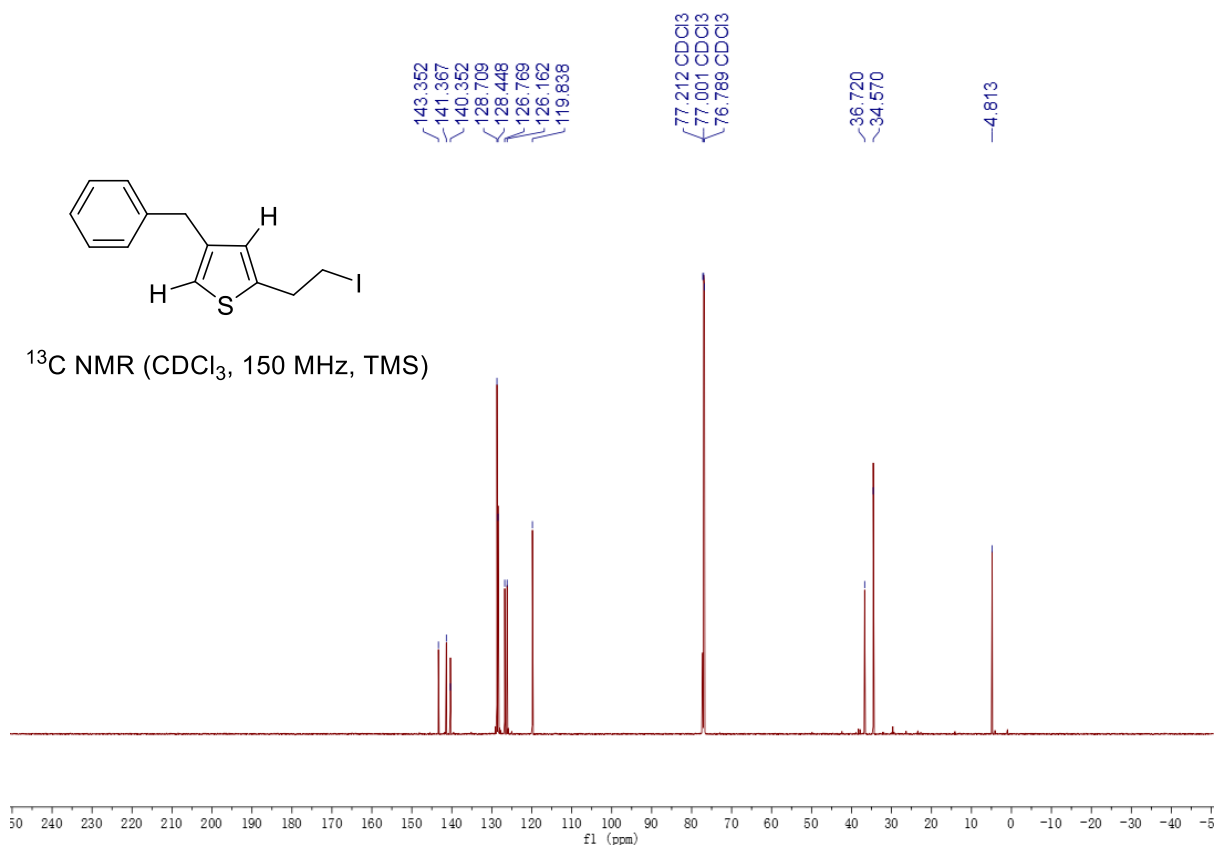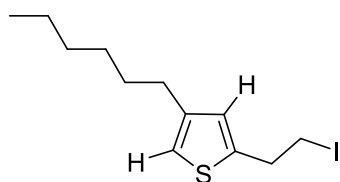

#### 4-hexyl-2-(2-iodoethyl)thiophene (8b)

A colorless oil, 28.7 mg, 89% yield. <sup>1</sup>H NMR (CDCl<sub>3</sub>, TMS, 600 MHz) δ 6.75 (s, 1H), 6.69 (s, 1H), 3.37 - 3.29 (m, 4H), 2.54 (t, *J* = 7.5 Hz, 2H), 1.61 - 1.55 (m, 3H), 1.38 - 1.25 (m, 7H), 0.92 - 0.85 (m, 3H). <sup>13</sup>C NMR (CDCl<sub>3</sub>, TMS, 150 MHz) δ 143.2, 142.8, 126.7, 118.4, 34.6, 31.6, 30.5, 30.3, 29.0, 22.6, 14.1, 5.0. IR (Acetone) ν 927, 961, 1245, 1730, 1978, 2027, 2174, 2920 cm<sup>-1</sup>. HRMS (EI) calcd. for C<sub>12</sub>H<sub>19</sub>IS (M<sup>+</sup>): 322.0255, Found: 322.0247.

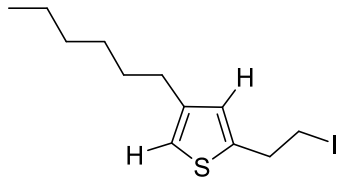

$^1\text{H NMR}$  ( $\text{CDCl}_3$ , 600 MHz, TMS)

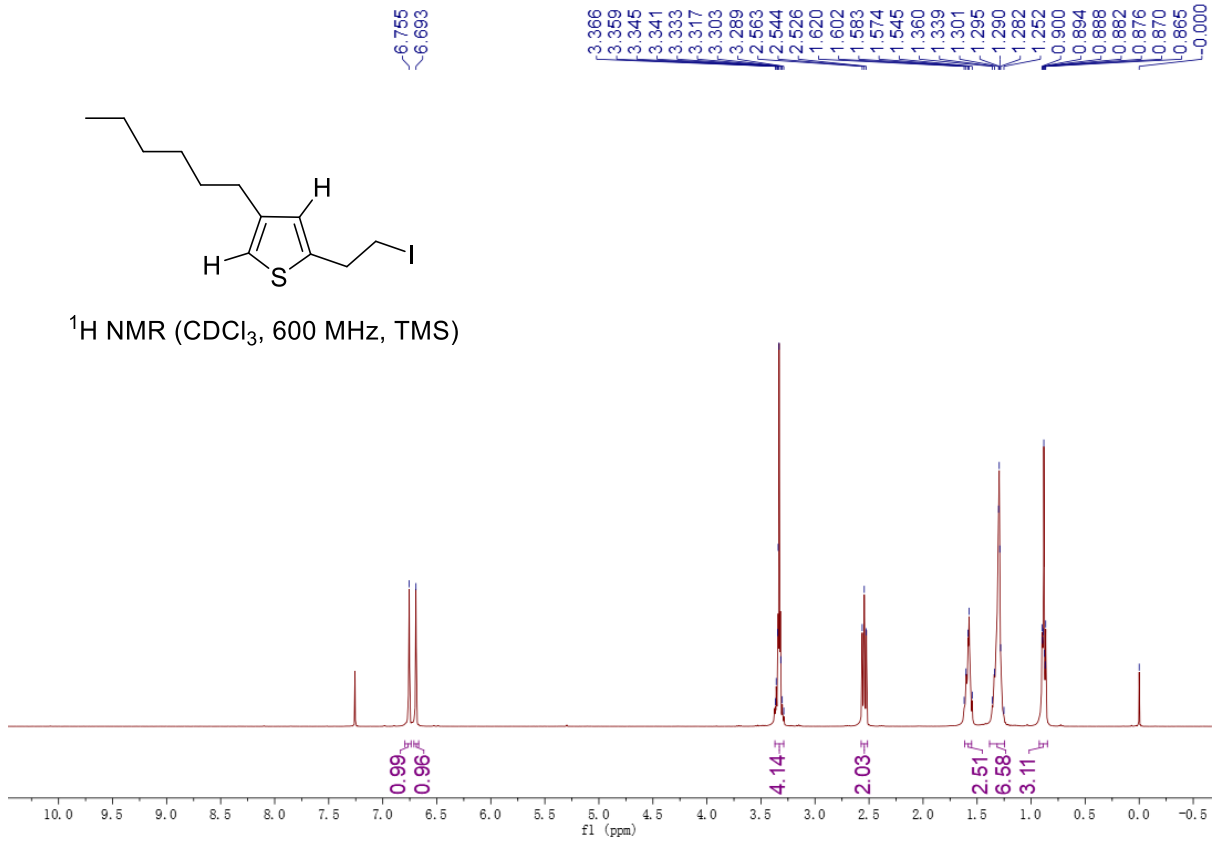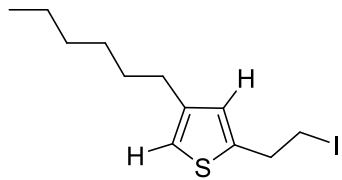

$^{13}\text{C NMR}$  ( $\text{CDCl}_3$ , 150 MHz, TMS)

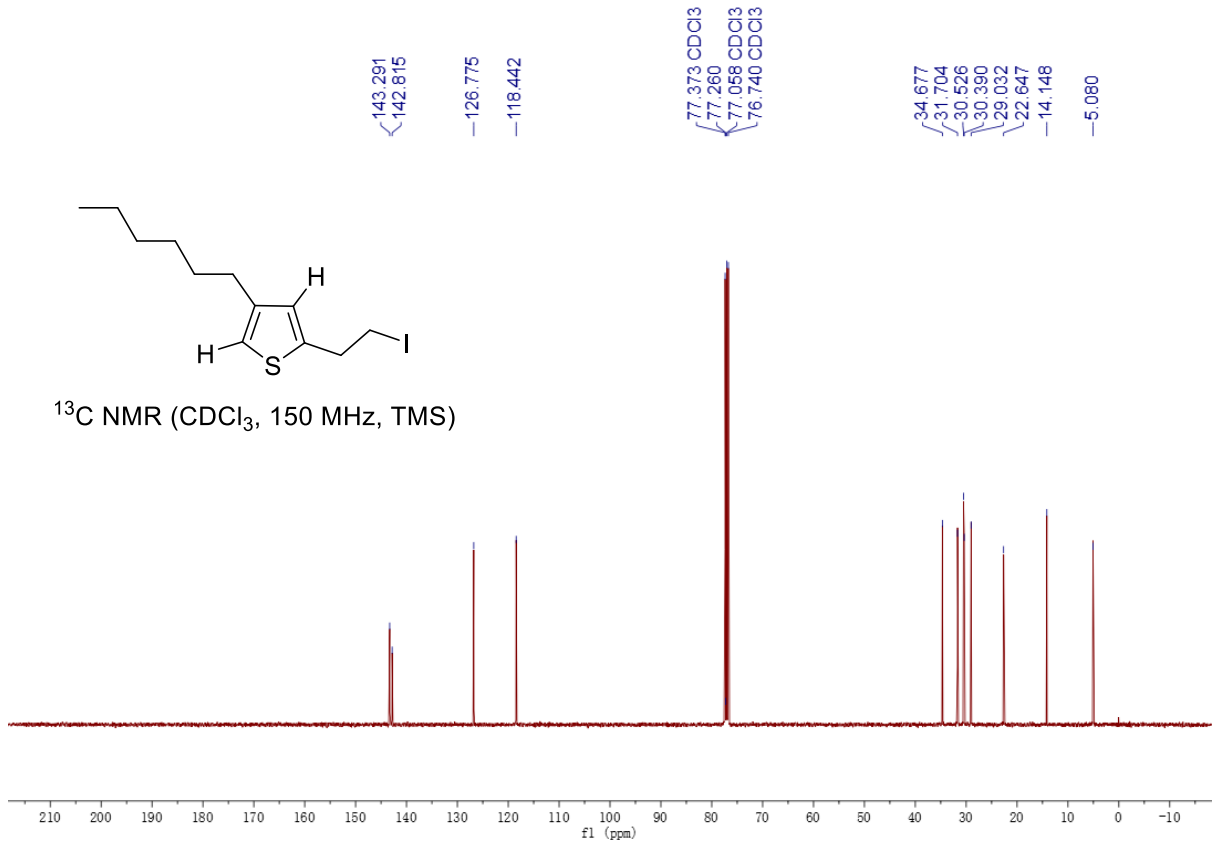

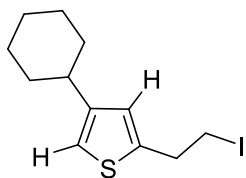

#### 4-cyclohexyl-2-(2-iodoethyl)thiophene (8c)

A colorless oil, 25.6 mg, 80% yield.  $^1\text{H}$  NMR ( $\text{CDCl}_3$ , TMS, 400 MHz)  $\delta$  6.76 (s, 1H), 6.75 (s, 1H), 3.37 - 3.29 (m, 4H), 2.58 - 2.46 (m, 1H), 1.94 (d,  $J = 5.7$  Hz, 2H), 1.84 - 1.77 (m, 2H), 1.75 - 1.68 (m, 1H), 1.39 - 1.30 (m, 4H), 1.28 - 1.18 (m, 1H).  $^{13}\text{C}$  NMR ( $\text{CDCl}_3$ , TMS, 100 MHz)  $\delta$  149.0, 142.6, 125.5, 116.9, 39.6, 34.8, 34.0, 26.5, 26.1, 4.9. IR (neat)  $\nu$  700, 732, 906, 1074, 1167, 1443, 1602, 2915  $\text{cm}^{-1}$ . HRMS (EI) calcd. for  $\text{C}_{12}\text{H}_{17}\text{IS}$  ( $\text{M}^+$ ): 320.0098, Found: 320.0090.

6.762  
6.746  
3.375  
3.360  
3.342  
3.321  
3.293  
2.560  
2.533  
2.514  
2.496  
1.968  
1.960  
1.946  
1.931  
1.919  
1.828  
1.823  
1.818  
1.807  
1.794  
1.786  
1.776  
1.742  
1.735  
1.723  
1.720  
1.712  
1.692  
1.683  
1.384  
1.375  
1.354  
1.342  
1.333  
1.329  
1.323  
1.317  
1.314  
1.309  
1.294  
1.284  
1.278  
1.270  
1.261  
1.254  
1.230  
1.227  
1.208  
1.203  
1.199  
1.196  
1.191  
0.000

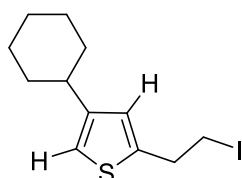

$^1\text{H}$  NMR ( $\text{CDCl}_3$ , 400 MHz, TMS)

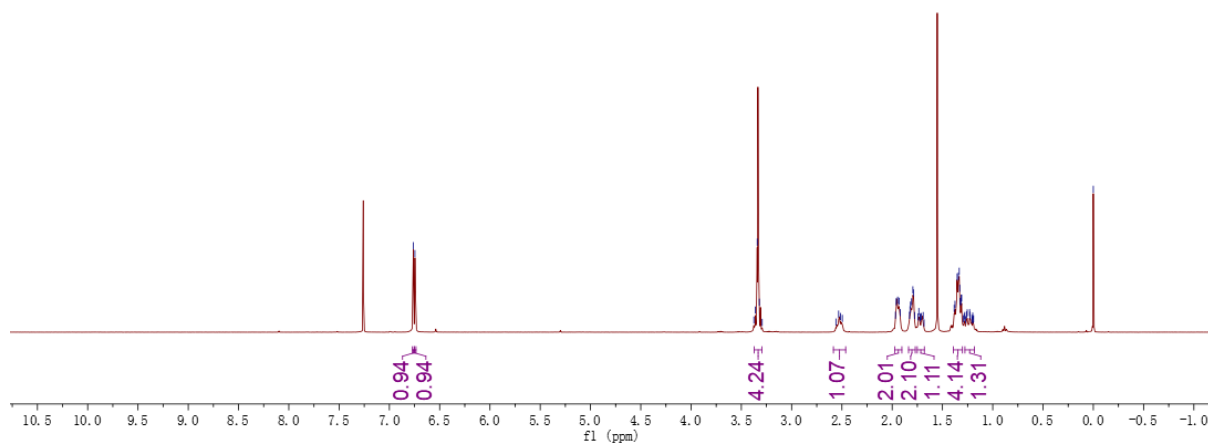

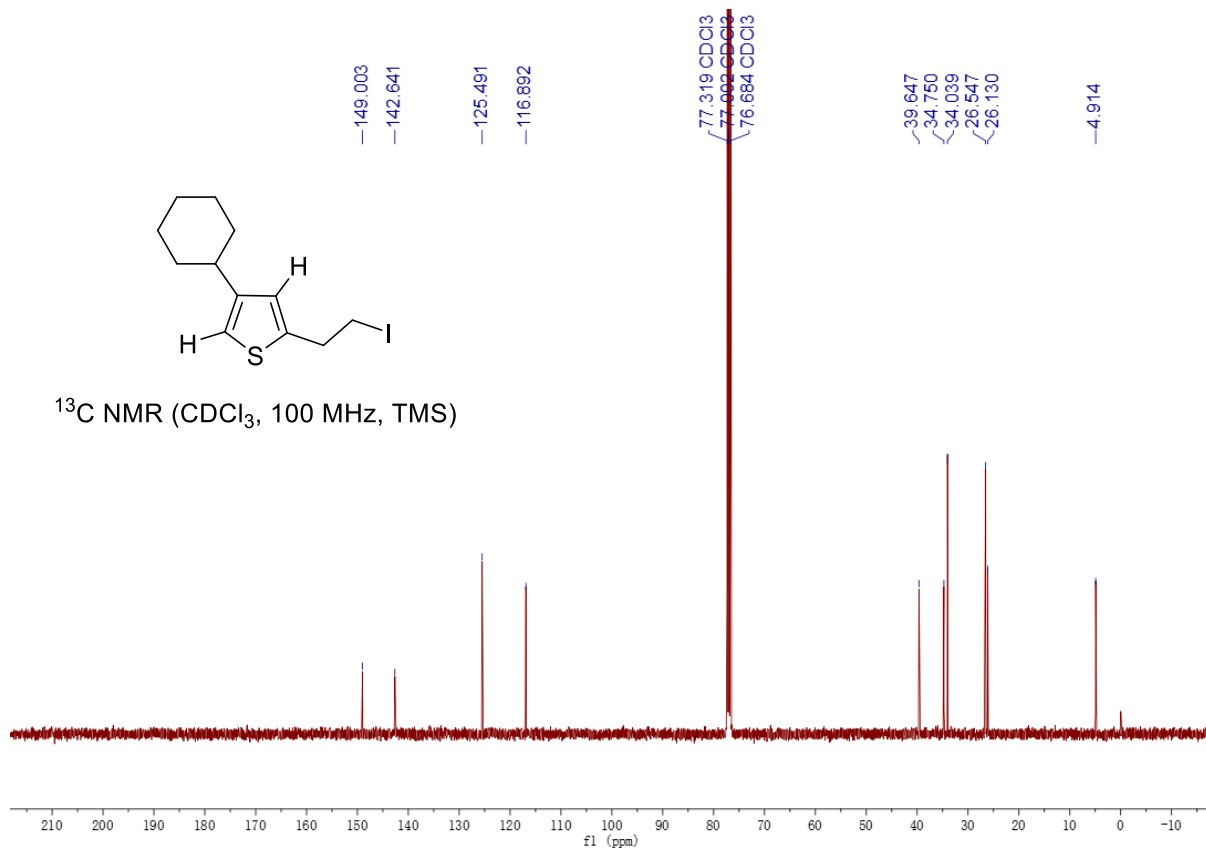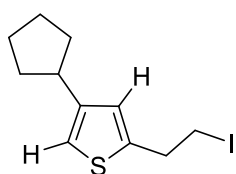

#### 4-cyclopentyl-2-(2-iodoethyl)thiophene (8d)

A colorless oil, 25.1 mg, 82% yield. <sup>1</sup>H NMR (CDCl<sub>3</sub>, TMS, 400 MHz) δ 6.78 (s, 1H), 6.74 (s, 1H), 3.40 - 3.27 (m, 4H), 3.03 - 2.92 (m, 1H), 2.08 - 1.95 (m, 2H), 1.83 - 1.69 (m, 2H), 1.68 - 1.59 (m, 2H), 1.56 - 1.48 (m, 2H). <sup>13</sup>C NMR (CDCl<sub>3</sub>, TMS, 150 MHz) δ 147.3, 142.9, 125.8, 117.2, 53.4, 41.3, 34.7, 33.8, 25.1, 4.9. IR (Acetone) ν 930, 965, 1233, 1720, 2013, 2177, 2900 cm<sup>-1</sup>.



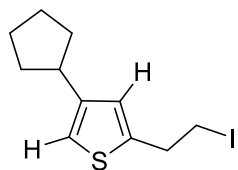

<sup>1</sup>H NMR (CDCl<sub>3</sub>, 400 MHz, TMS)

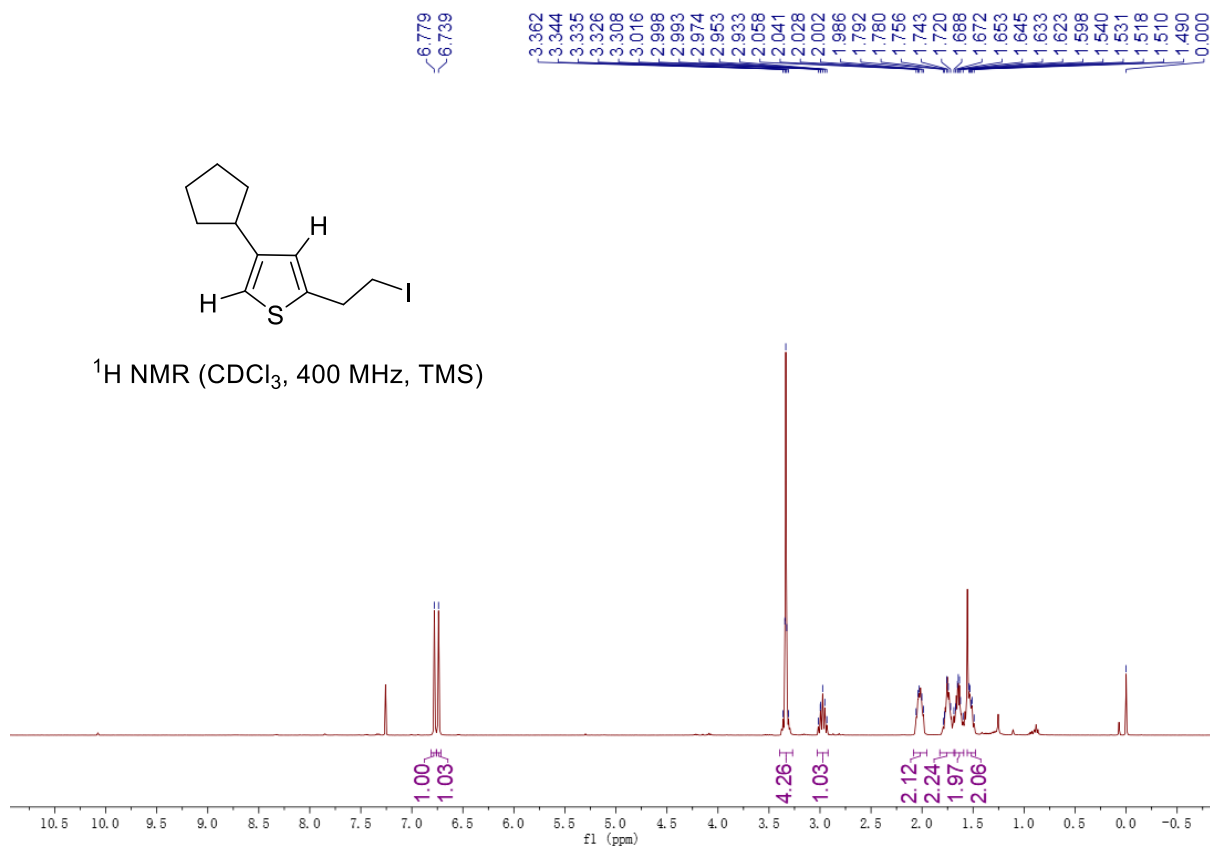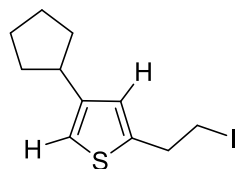

<sup>13</sup>C NMR (CDCl<sub>3</sub>, 150 MHz, TMS)

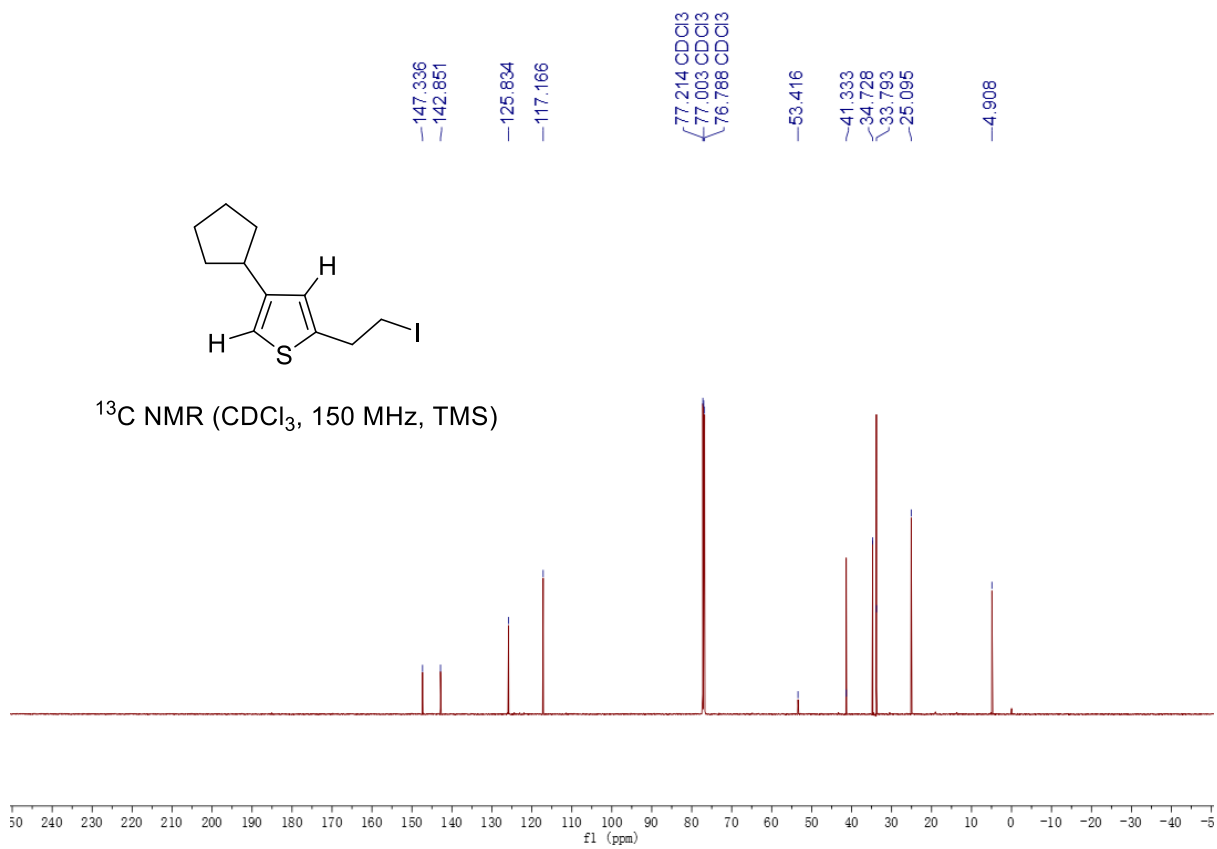

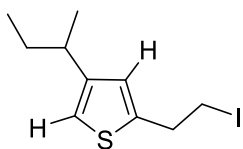

#### 4-(sec-butyl)-2-(2-iodoethyl)thiophene (8e)

A colorless oil, 25.1 mg, 88% yield.  $^1\text{H}$  NMR ( $\text{CDCl}_3$ , TMS, 400 MHz)  $\delta$  6.75 (s, 1H), 6.71 (s, 1H), 3.38 - 3.29 (m, 4H), 2.71 - 2.59 (m, 1H), 1.61 - 1.50 (m, 2H), 1.20 (d,  $J = 6.9$  Hz, 3H), 0.84 (t,  $J = 7.5$  Hz, 3H).  $^{13}\text{C}$  NMR ( $\text{CDCl}_3$ , TMS, 100 MHz)  $\delta$  148.5, 142.7, 125.3, 117.5, 36.9, 34.7, 34.1, 30.7, 22.3, 21.0, 14.1, 11.9, 5.1. IR (Acetone)  $\nu$  937, 980, 1223, 1713, 2003, 2167, 2912  $\text{cm}^{-1}$ . HRMS (EI) calcd. for  $\text{C}_{10}\text{H}_{15}\text{IS}$  ( $\text{M}^+$ ): 293.9941, Found: 293.9934.

6.755  
6.714

3.378  
3.350  
3.346  
3.338  
3.334  
3.326  
3.294  
2.693  
2.676  
2.659  
2.641  
2.624  
2.607  
1.603  
1.584  
1.566  
1.554  
1.539  
1.521  
1.504  
1.212  
1.194  
0.863  
0.844  
0.826  
0.000

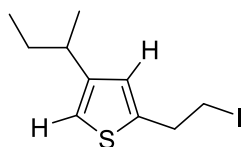

$^1\text{H}$  NMR ( $\text{CDCl}_3$ , 400 MHz, TMS)

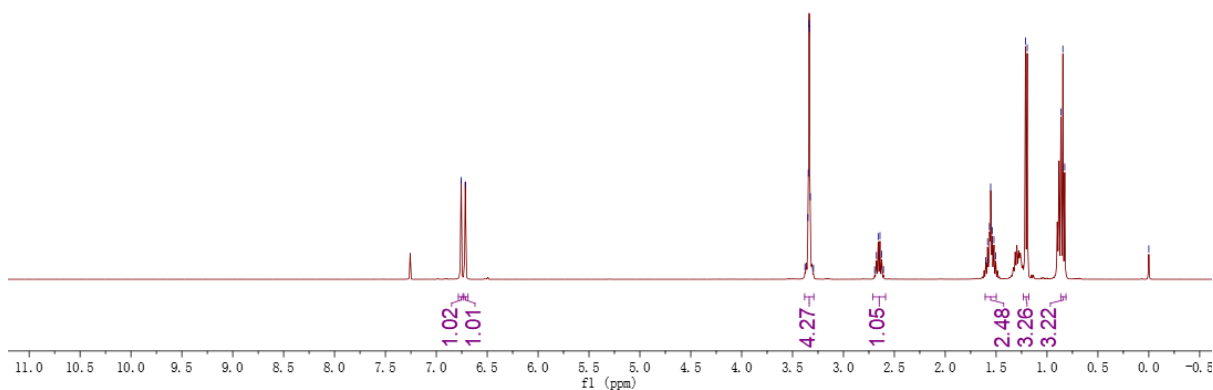

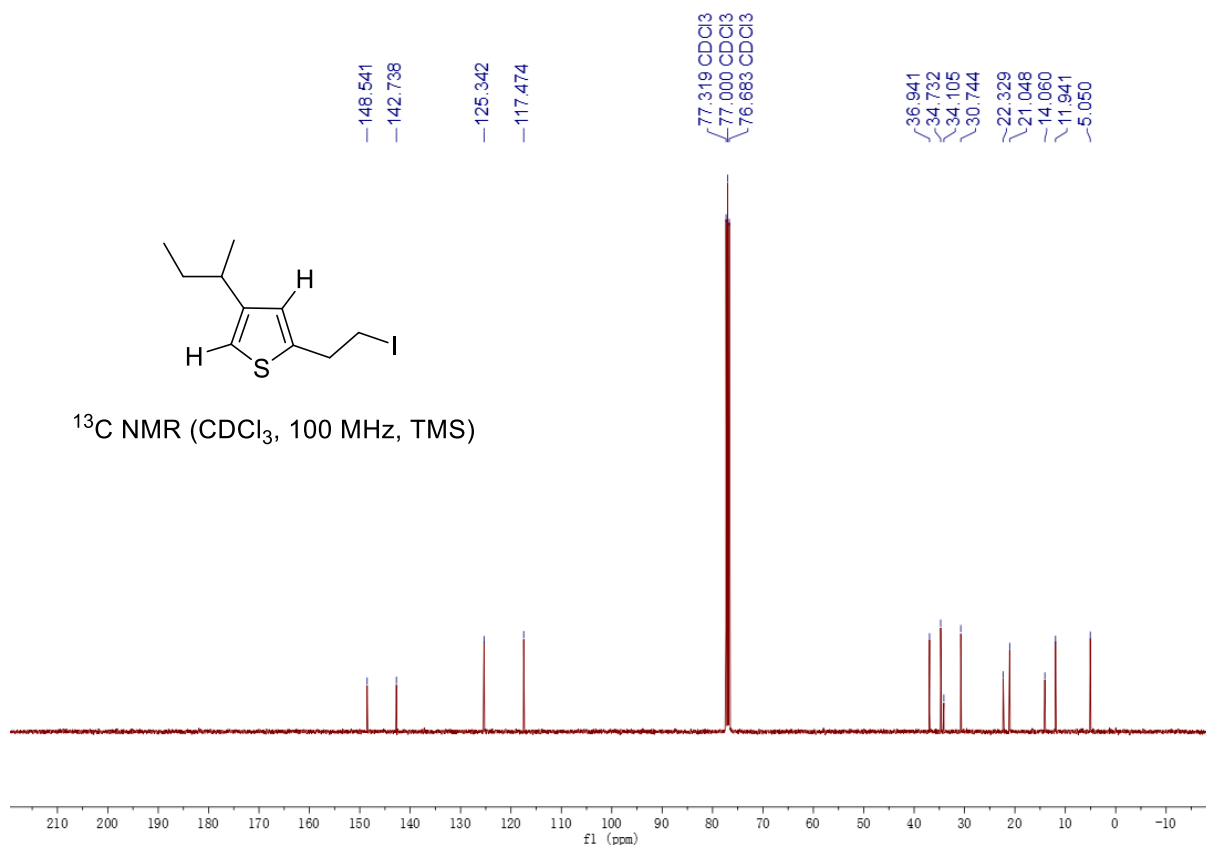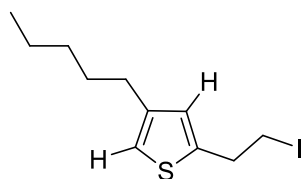

### 2-(2-iodoethyl)-4-pentylthiophene (8f)

A colorless oil, 25.6 mg, 83% yield. <sup>1</sup>H NMR (CDCl<sub>3</sub>, TMS, 400 MHz) δ 6.76 (s, 1H), 6.70 (s, 1H), 3.38 - 3.28 (m, 4H), 2.54 (t, *J* = 7.7 Hz, 2H), 1.64 - 1.56 (m, 2H), 1.37 - 1.27 (m, 4H), 0.89 (t, *J* = 6.8 Hz, 3H). <sup>13</sup>C NMR (CDCl<sub>3</sub>, TMS, 100 MHz) δ 143.2, 142.8, 126.7, 118.4, 76.7, 34.6, 31.5, 30.4, 30.1, 22.5, 14.0, 5.0. IR (Acetone) ν 927, 960, 1263, 1733, 2022, 2155, 2908 cm<sup>-1</sup>. HRMS (EI) calcd. for C<sub>11</sub>H<sub>17</sub>IS (M<sup>+</sup>): 308.0095, Found: 308.0090.

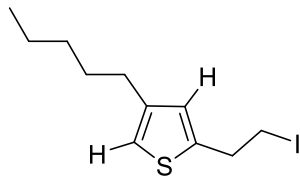

$^1\text{H}$  NMR ( $\text{CDCl}_3$ , 400 MHz, TMS)

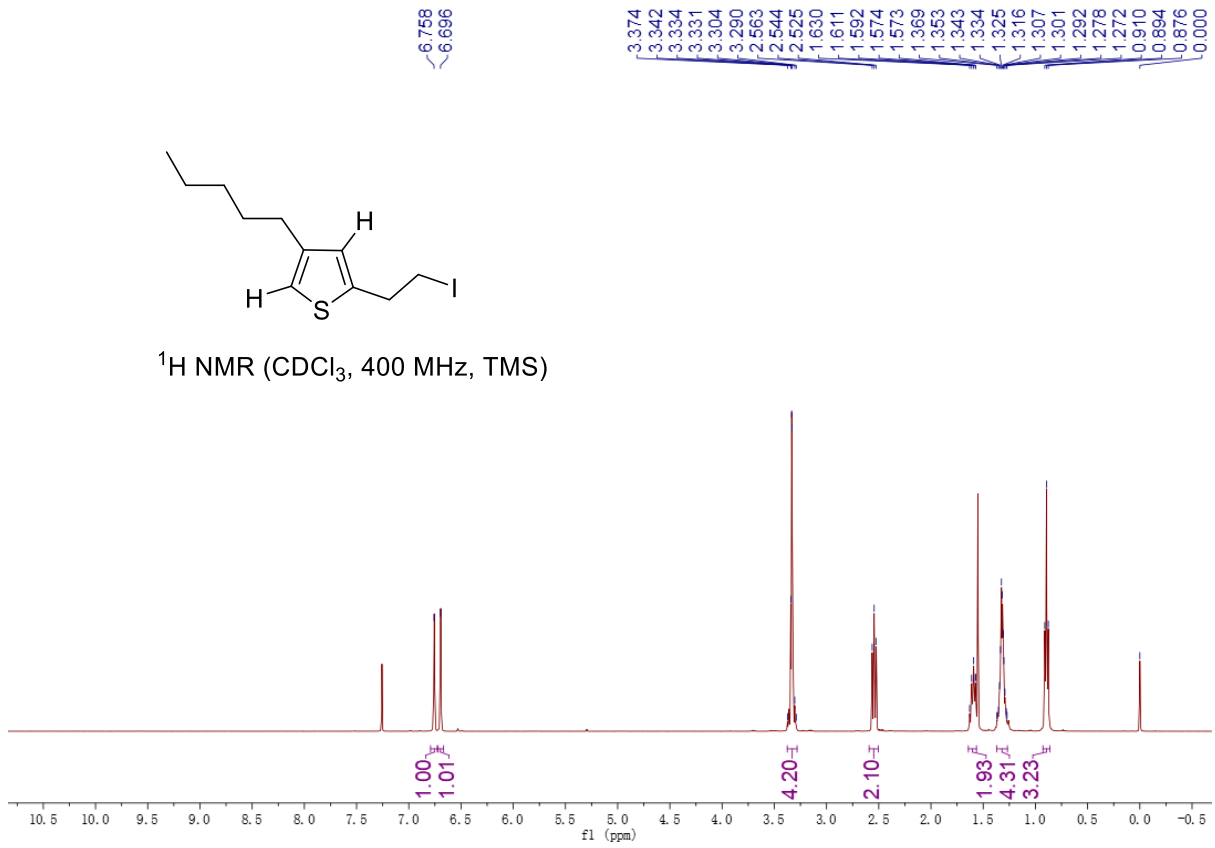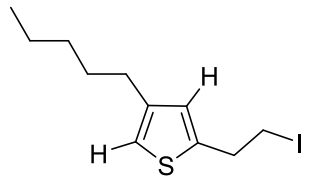

$^{13}\text{C}$  NMR ( $\text{CDCl}_3$ , 100 MHz, TMS)

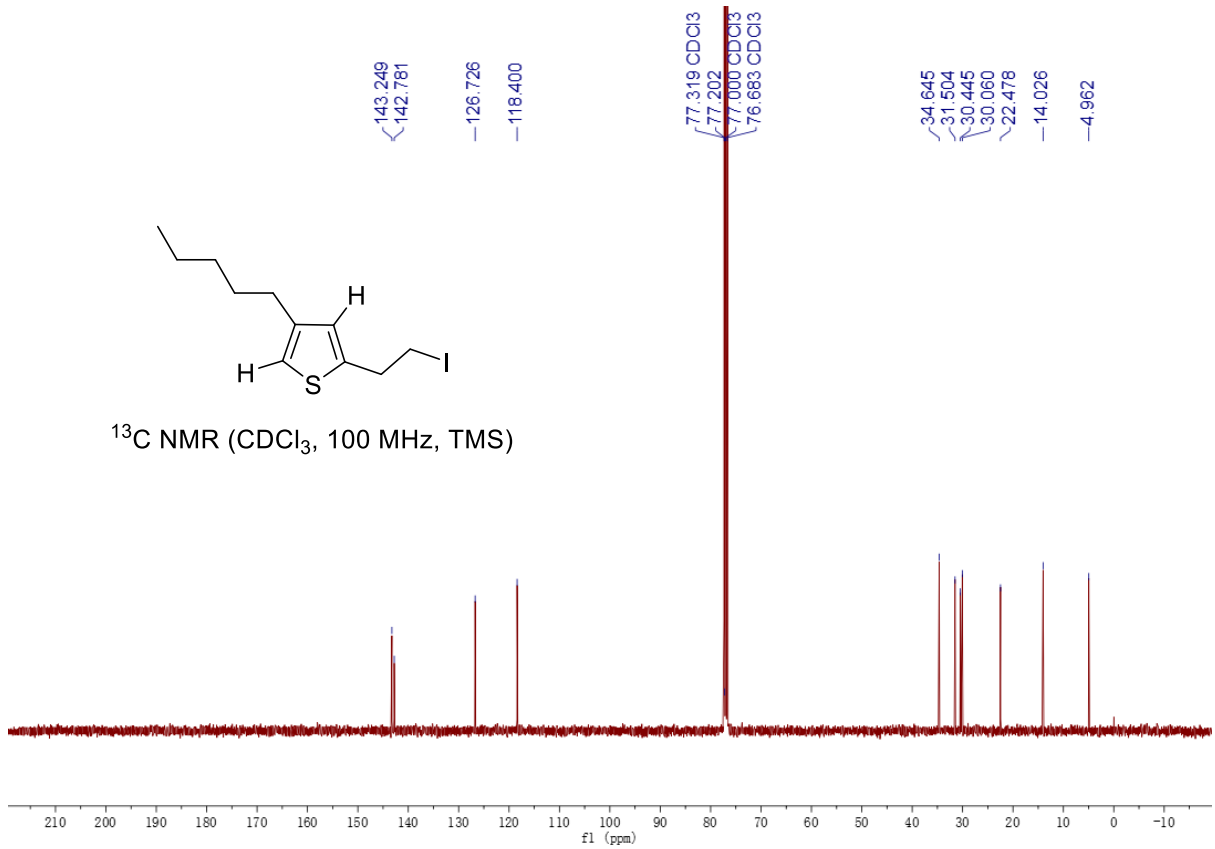

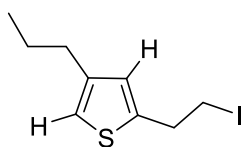

### 2-(2-iodoethyl)-4-propylthiophene (8g)

A colorless oil, 26.1 mg, 93% yield.  $^1\text{H}$  NMR ( $\text{CDCl}_3$ , TMS, 400 MHz)  $\delta$  6.76 (s, 1H), 6.70 (s, 1H), 3.38 - 3.28 (m, 4H), 2.53 (t,  $J = 7.6$  Hz, 2H), 1.66 - 1.58 (m, 2H), 0.94 (t,  $J = 7.4$  Hz, 3H).  $^{13}\text{C}$  NMR ( $\text{CDCl}_3$ , TMS, 100 MHz)  $\delta$  143.0, 142.8, 126.7, 118.5, 34.6, 32.6, 23.5, 13.9, 5.0. IR (neat)  $\nu$  937, 954, 1241, 1761, 2035, 2124, 2911  $\text{cm}^{-1}$ . HRMS (EI) calcd. for  $\text{C}_9\text{H}_{13}\text{IS}$  ( $\text{M}^+$ ): 279.9780, Found: 279.9777.

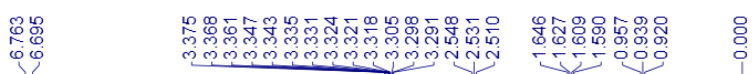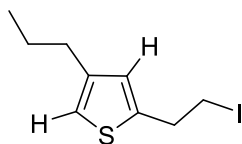

$^1\text{H}$  NMR ( $\text{CDCl}_3$ , 400 MHz, TMS)

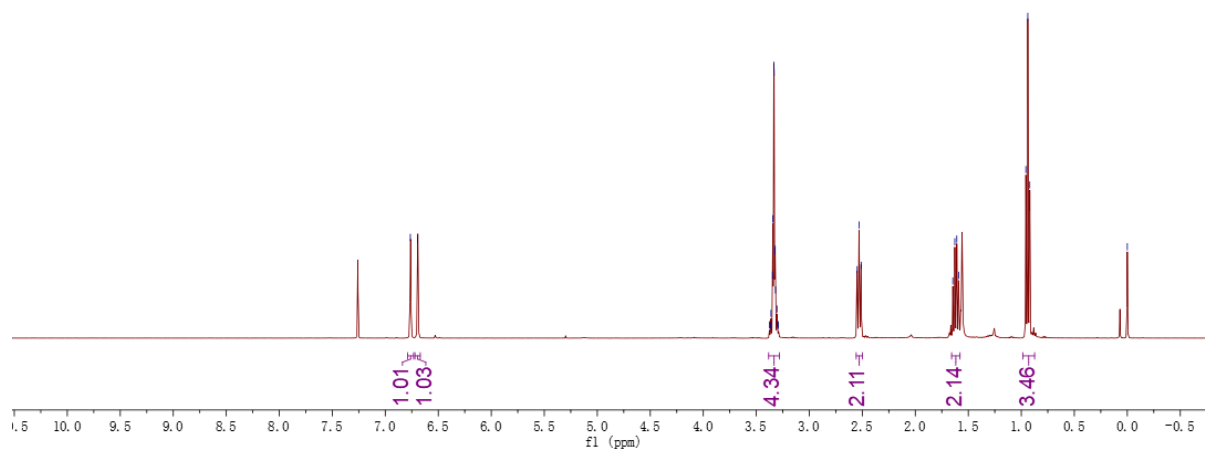

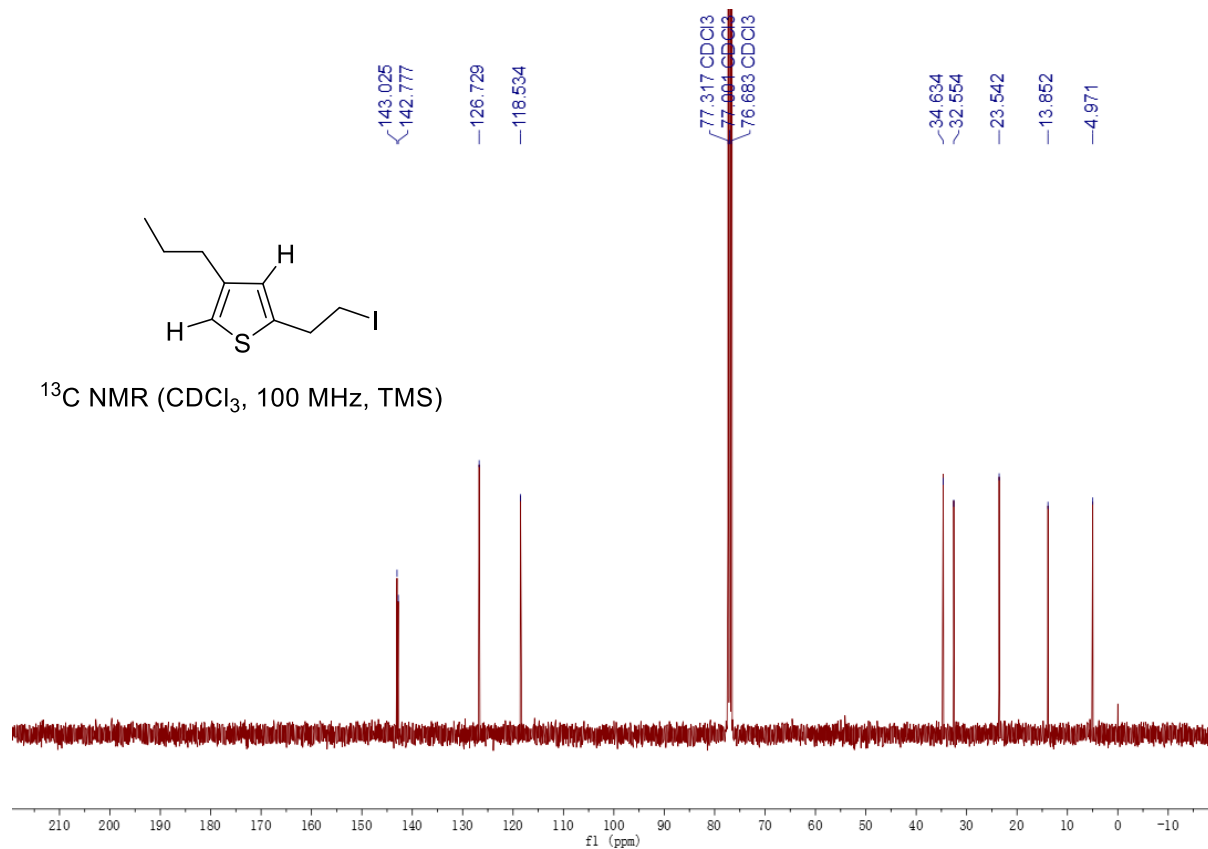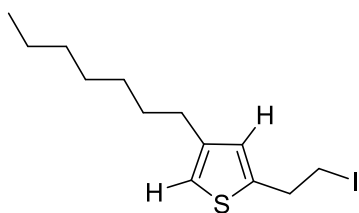

#### 4-heptyl-2-(2-iodoethyl)thiophene (8h)

A colorless oil, 27.2 mg, 81% yield. <sup>1</sup>H NMR (CDCl<sub>3</sub>, TMS, 400 MHz) δ 6.76 (s, 1H), 6.69 (s, 1H), 3.38 - 3.28 (m, 4H), 2.57 - 2.51 (m, 2H), 1.63 - 1.57 (m, 2H), 1.35 - 1.25 (m, 8H), 0.91 - 0.84 (m, 3H). <sup>13</sup>C NMR (CDCl<sub>3</sub>, TMS, 100 MHz) δ 143.2, 142.8, 126.7, 118.4, 34.6, 31.8, 30.5, 30.4, 29.3, 29.1, 22.6, 14.1, 5.0. IR (neat) ν 927, 934, 1221, 1781, 2015, 2144, 2931 cm<sup>-1</sup>. HRMS (EI) calcd. for C<sub>13</sub>H<sub>21</sub>IS (M<sup>+</sup>): 336.0414, Found: 336.0403.

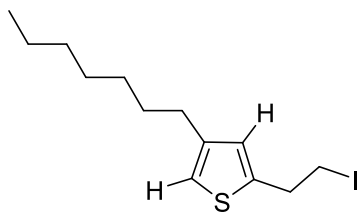

$^1\text{H NMR}$  ( $\text{CDCl}_3$ , 400 MHz, TMS)

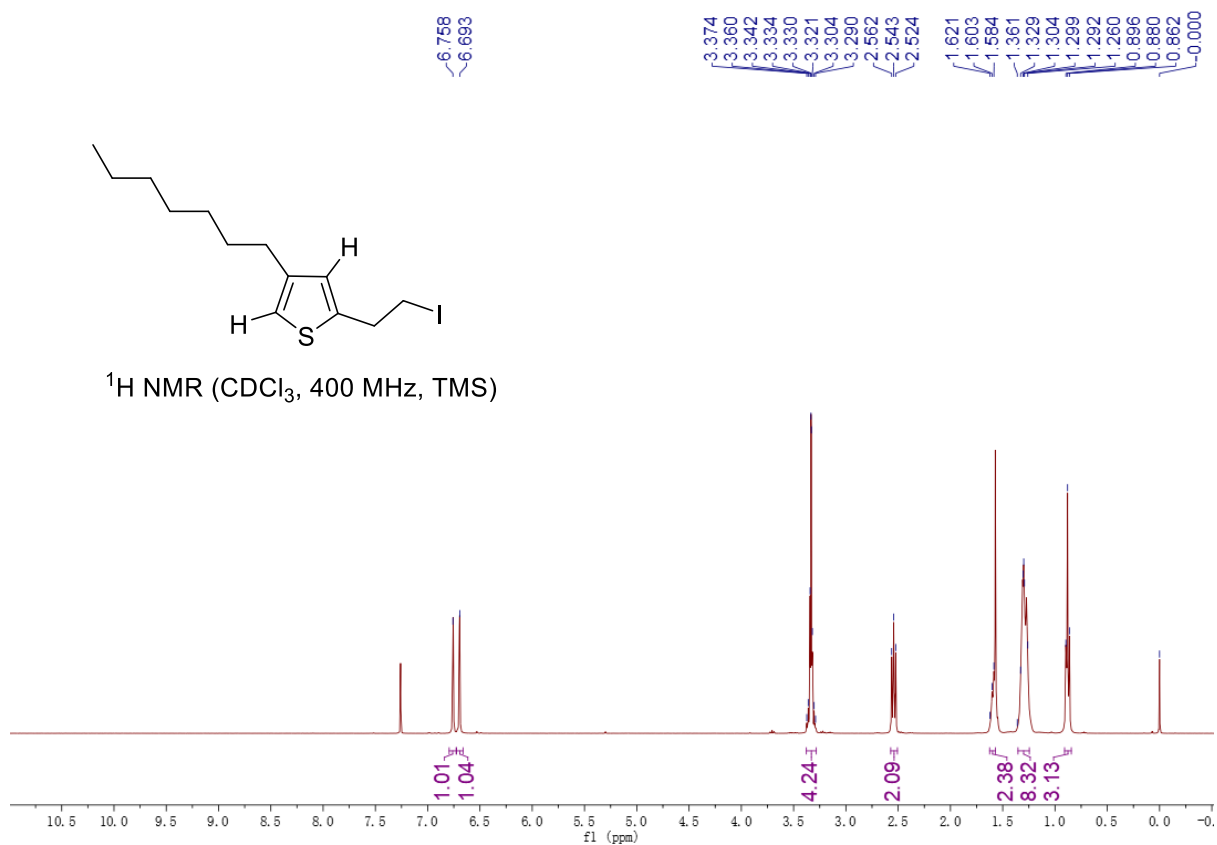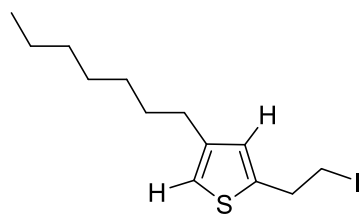

$^{13}\text{C NMR}$  ( $\text{CDCl}_3$ , 100 MHz, TMS)

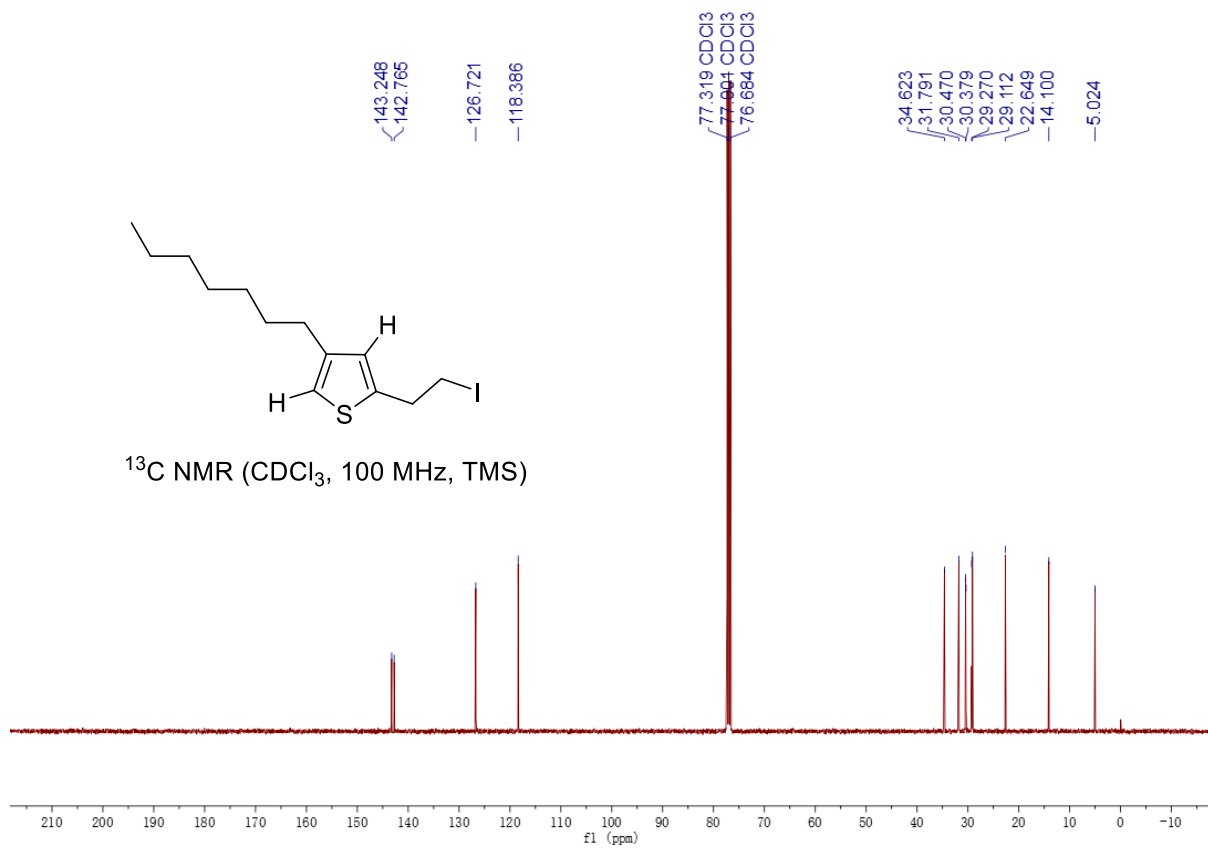

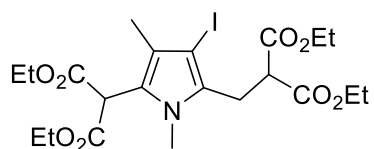

**diethyl 2-((5-(1,3-diethoxy-1,3-dioxopropan-2-yl)-3-iodo-1,4-dimethyl-1H-pyrrol-2-yl)methyl)malonate (9)**

A yellow oil, 37.5 mg, 68% yield.  $^1\text{H}$  NMR ( $\text{CDCl}_3$ , TMS, 400 MHz)  $\delta$  4.27 - 4.10 (m, 8H), 3.59 (s, 3H), 3.40 (t,  $J = 7.1$  Hz, 1H), 3.36 (s, 1H), 2.84 - 2.73 (m, 2H), 2.09-2.01 (m, 5H), 1.33 - 1.23 (m, 12H).  $^{13}\text{C}$  NMR ( $\text{CDCl}_3$ , TMS, 150 MHz)  $\delta$  169.0, 166.6, 136.3, 125.7, 70.8, 67.3, 61.6, 51.0, 41.7, 36.7, 28.1, 26.4, 16.7, 14.1. IR (neat)  $\nu$  615, 803, 933, 1179, 1316, 1758, 2901, 2988  $\text{cm}^{-1}$ . HRMS (EI) calcd. for  $\text{C}_{20}\text{H}_{30}\text{INO}_8\text{Na}$  ( $\text{M}+\text{Na}$ ): 574.0914, Found: 574.0918.



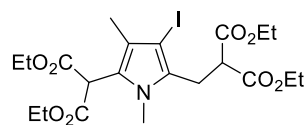

$^1\text{H NMR}$  ( $\text{CDCl}_3$ , 400 MHz, TMS)

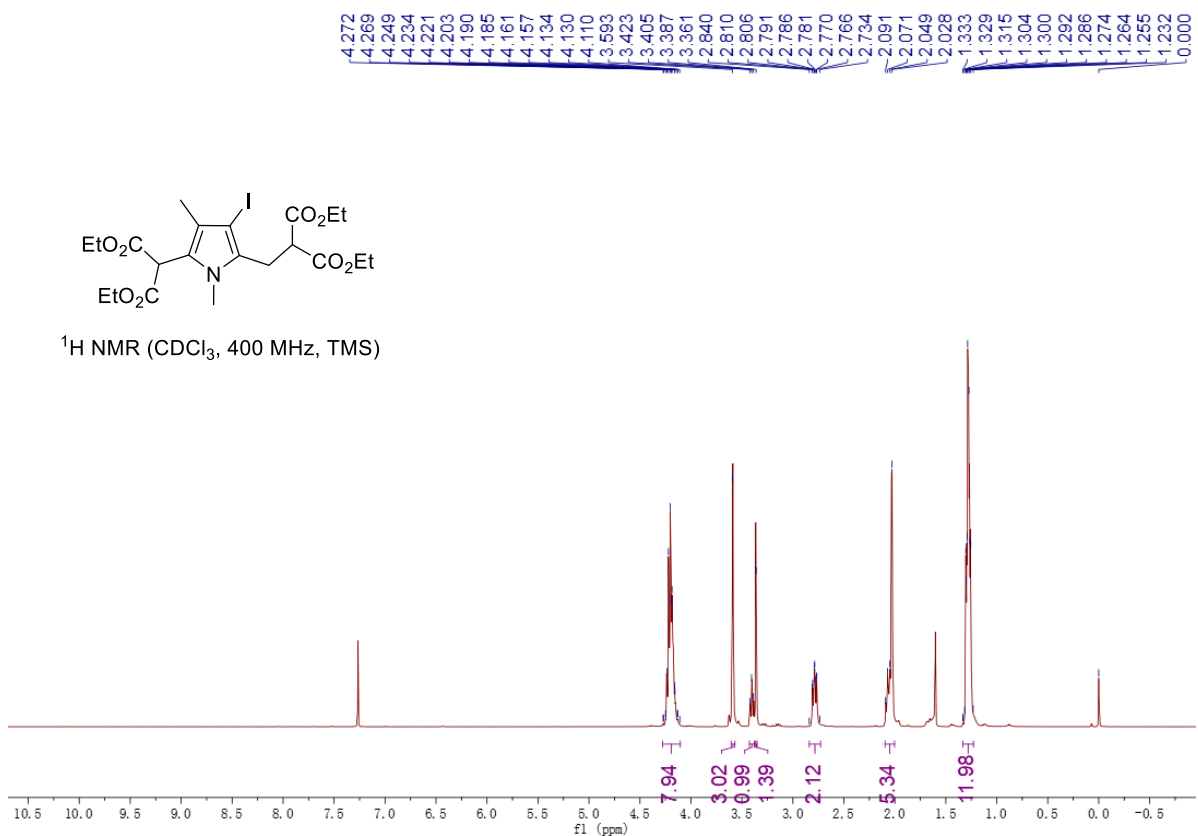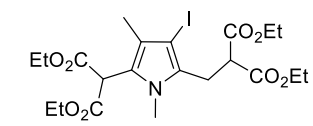

$^{13}\text{C NMR}$  ( $\text{CDCl}_3$ , 100 MHz, TMS)

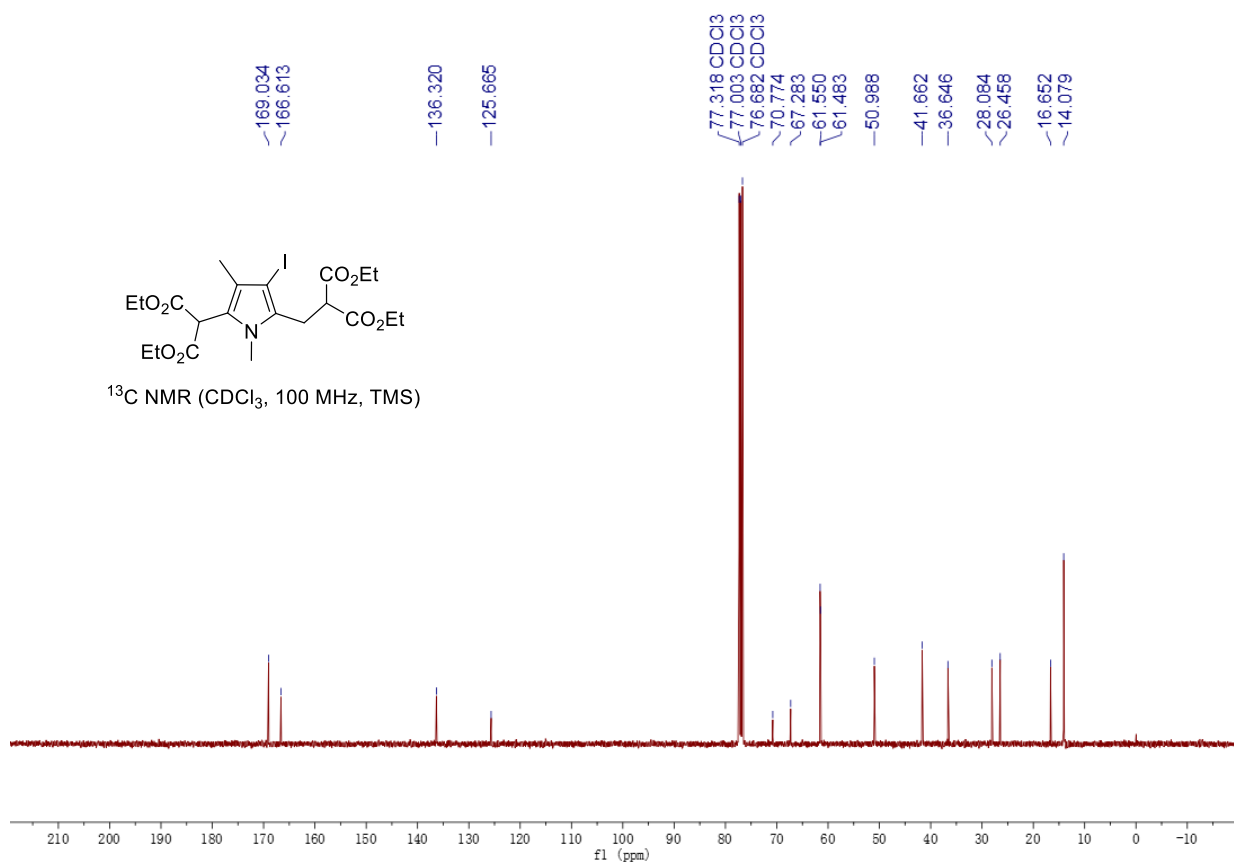

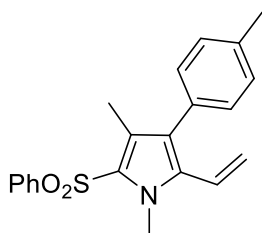

**1,3-dimethyl-2-(phenylsulfonyl)-4-(p-tolyl)-5-vinyl-1H-pyrrole (11)**

A yellow oil, 16.9 mg, 68% yield.  $^1\text{H}$  NMR ( $\text{CDCl}_3$ , TMS, 600 MHz)  $\delta$  7.91 - 7.89 (m, 2H), 7.59 - 7.56 (m, 1H), 7.54 - 7.50 (m, 2H), 7.20 - 7.17 (m, 2H), 7.09 - 7.06 (m, 2H), 6.40 (dd,  $J = 17.9, 11.9$  Hz, 1H), 5.27 (d,  $J = 11.8$  Hz, 1H), 5.16 (d,  $J = 17.8$  Hz, 1H), 3.77 (s, 3H), 2.38 (s, 3H), 2.30 (s, 3H).  $^{13}\text{C}$  NMR ( $\text{CDCl}_3$ , TMS, 150 MHz)  $\delta$  143.5, 136.5, 134.4, 132.7, 131.4, 130.5, 129.2, 129.1, 127.8, 126.4, 125.3, 124.7, 123.6, 122.3, 120.3, 33.2, 26.9, 21.2, 11.2. IR (neat)  $\nu$  603, 815, 957, 1179, 1316, 2921, 2978  $\text{cm}^{-1}$ . HRMS (EI) calcd. for  $\text{C}_{21}\text{H}_{21}\text{NO}_2\text{S}$  ( $\text{M}+\text{H}$ ): 352.1371, Found: 352.1399.

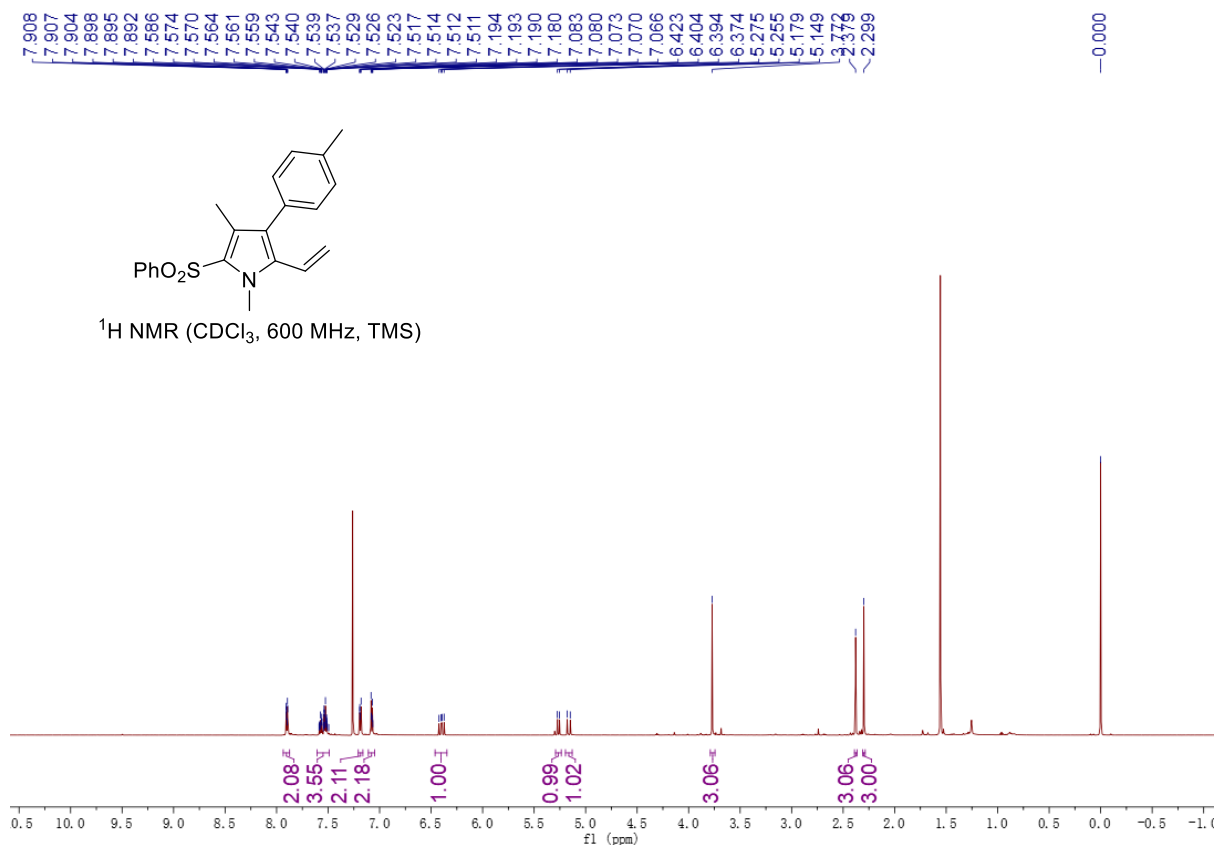

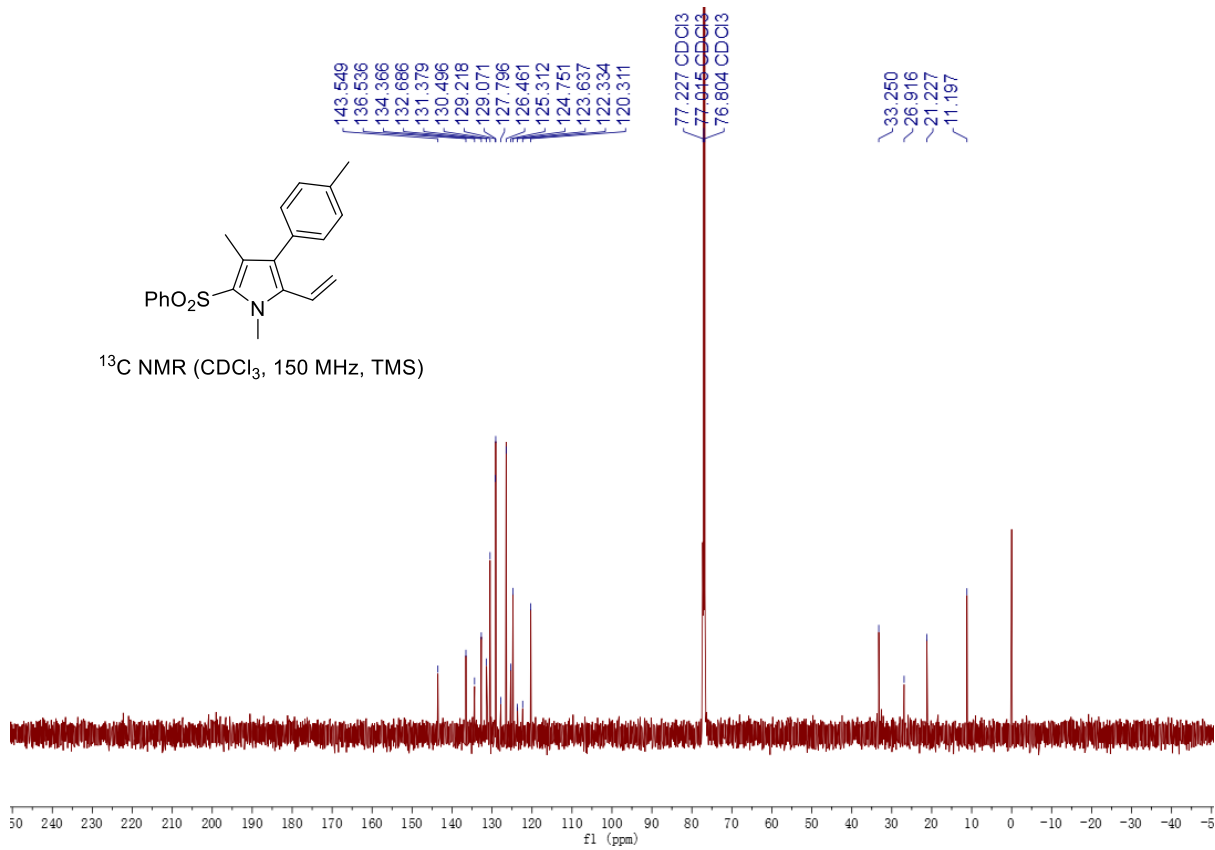

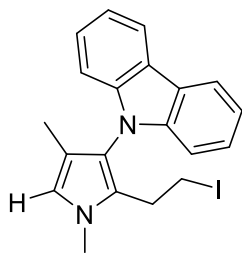

**9-(2-(2-iodoethyl)-1,4-dimethyl-1H-pyrrol-3-yl)-9H-carbazole (12)**

A yellow oil, 14.5 mg, 35% yield.  $^1\text{H}$  NMR ( $\text{CDCl}_3$ , TMS, 600 MHz)  $\delta$  8.09 (d,  $J = 7.7$  Hz, 2H), 7.43 (t,  $J = 7.7$  Hz, 2H), 7.31 (d,  $J = 8.2$  Hz, 2H), 7.22 (t,  $J = 7.4$  Hz, 2H), 6.26 (s, 1H), 4.45 (t,  $J = 7.1$  Hz, 2H), 3.11 (t,  $J = 7.1$  Hz, 2H), 3.00 (s, 3H), 2.00 (s, 3H).  $^{13}\text{C}$  NMR ( $\text{CDCl}_3$ , TMS, 150 MHz)  $\delta$  140.0, 130.4, 125.8, 122.9, 120.7, 120.3, 119.9, 119.0, 108.5, 68.3, 42.5, 34.1, 26.3, 13.4. IR (neat)  $\nu$  927, 934, 1221, 1781, 2015, 2144, 2931  $\text{cm}^{-1}$ . HRMS (EI) calcd. for  $\text{C}_{20}\text{H}_{19}\text{N}_2\text{I}$  ( $\text{M}^+$ ): 414.0593, Found: 414.0593.

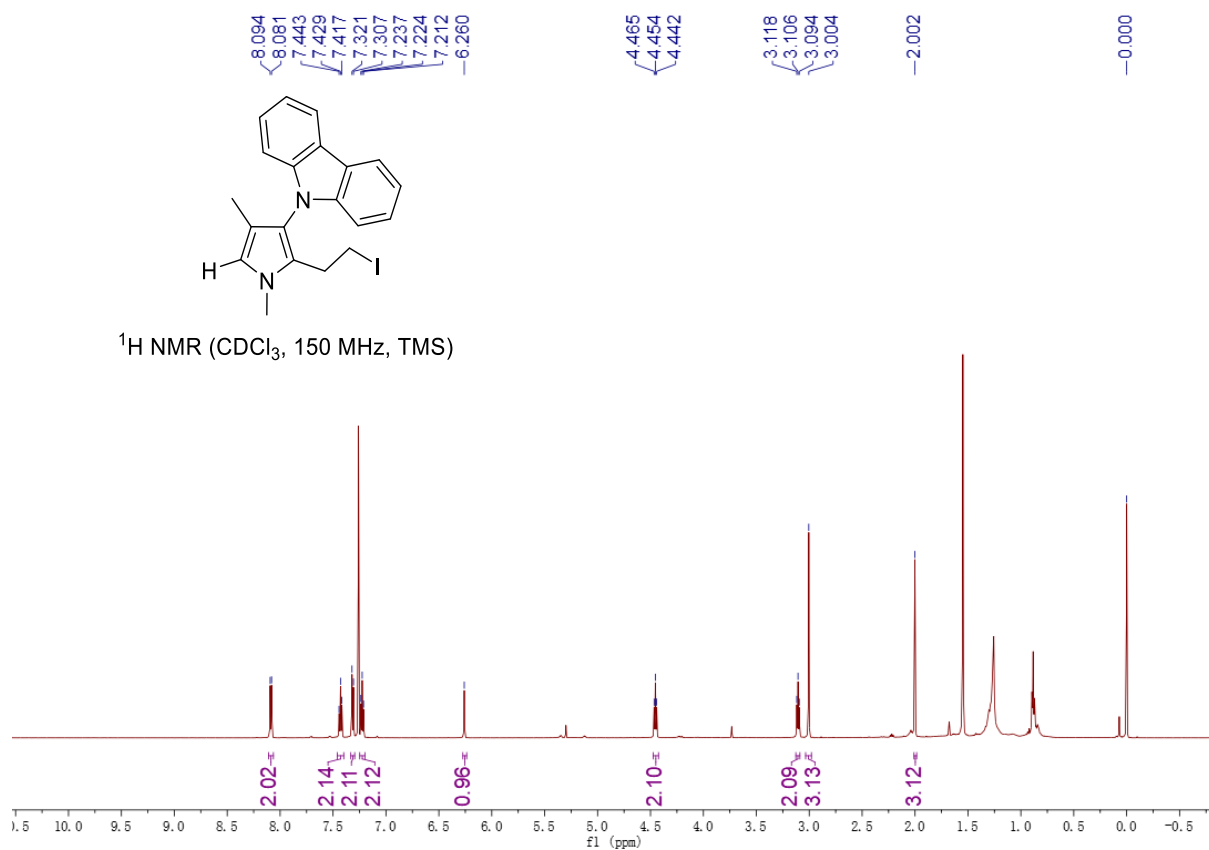

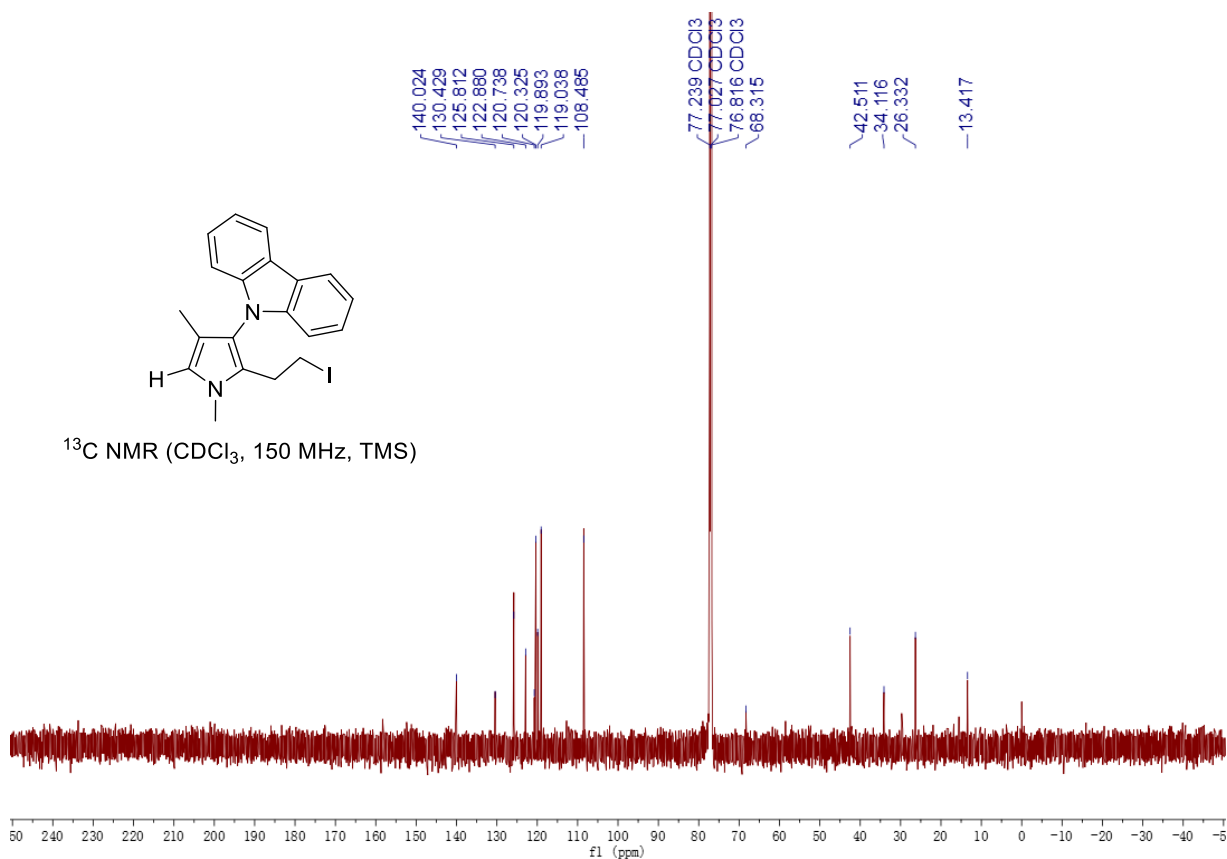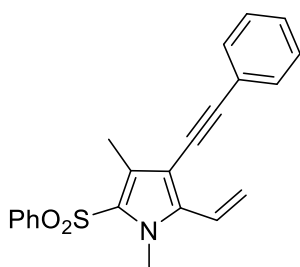

### 1,3-dimethyl-4-(phenylethynyl)-2-(phenylsulfonyl)-5-vinyl-1H-pyrrole (13)

A yellow oil, 23.1 mg, 64% yield. <sup>1</sup>H NMR (CDCl<sub>3</sub>, TMS, 400 MHz) δ 7.85 (d, *J* = 7.0 Hz, 2H), 7.60 - 7.46 (m, 5H), 7.37 - 7.30 (m, 3H), 6.57 (dd, *J* = 17.5, 11.6 Hz, 1H), 6.38 (d, *J* = 17.5 Hz, 1H), 5.61 (d, *J* = 11.6 Hz, 1H), 3.71 (s, 3H), 2.57 (s, 3H). <sup>13</sup>C NMR (CDCl<sub>3</sub>, TMS, 100 MHz) δ 143.0, 138.1, 133.0, 132.1, 131.2, 129.3, 128.4, 128.0, 126.4, 123.8, 123.6, 123.3, 120.8, 105.4, 94.8, 82.9, 32.7, 11.7. IR (neat) ν 754, 913, 1079, 1326, 2901, 2988 cm<sup>-1</sup>. HRMS (EI) calcd. for C<sub>22</sub>H<sub>19</sub>NO<sub>2</sub>SNa (M+Na): 384.1034, Found: 384.1022.

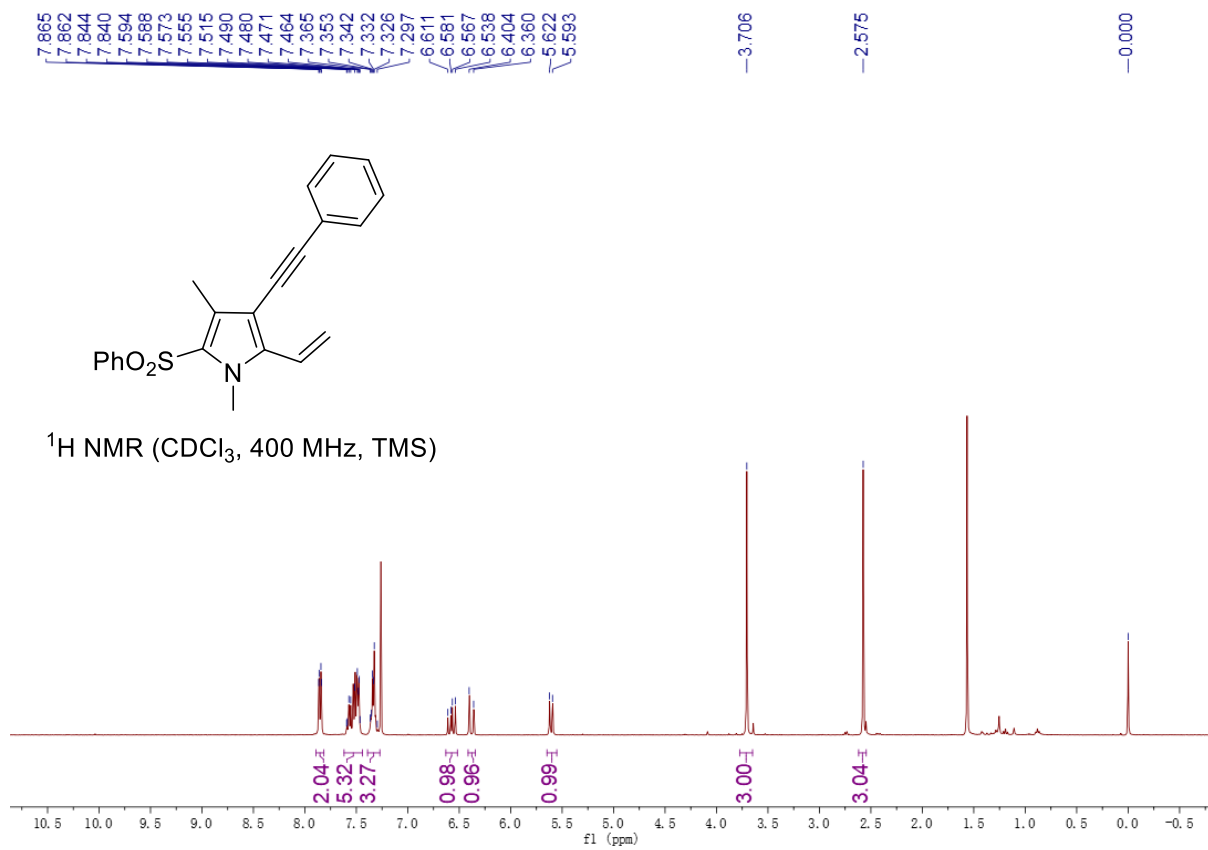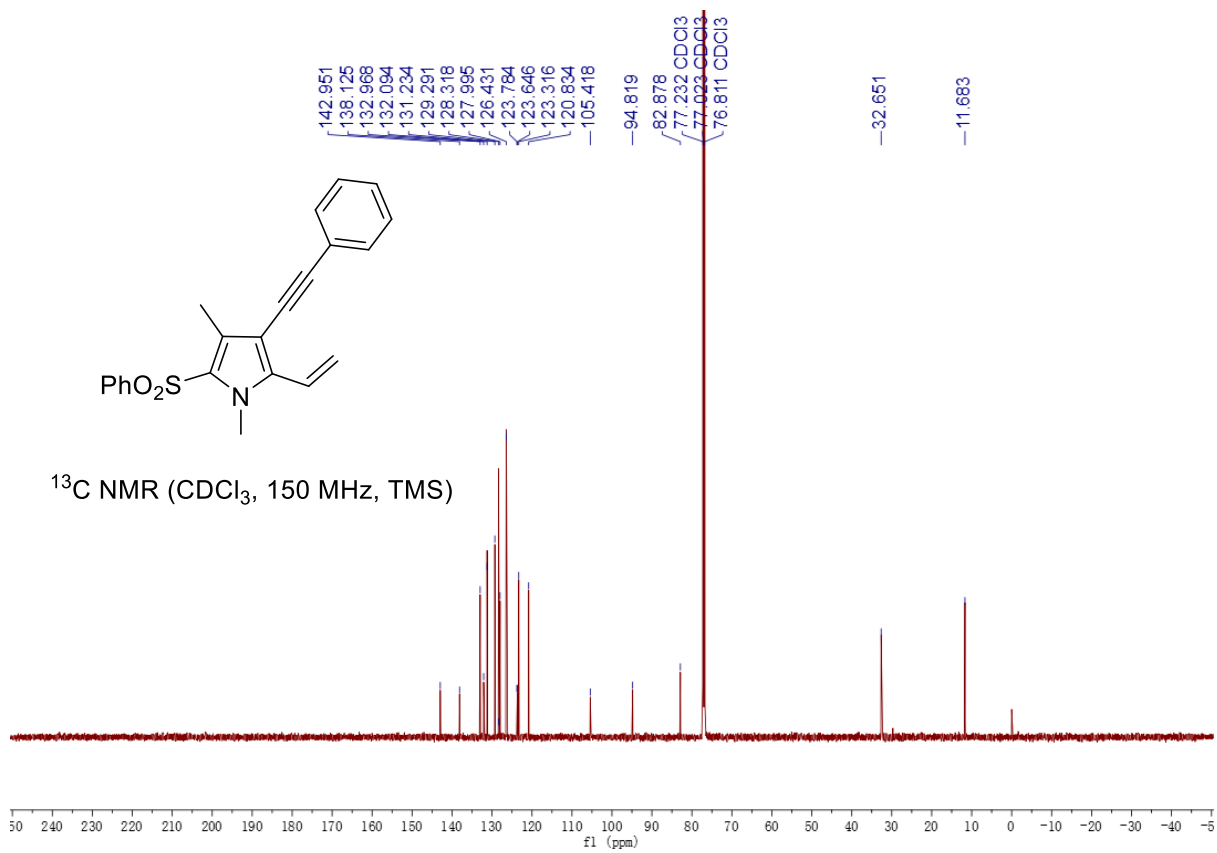

## 10. Computational studies

All quantum mechanical calculations have been performed with Gaussian 16. The geometries of all species have been optimized at B3LYP/6-31G(d) level. The subsequent frequency calculations on the stationary points were carried out at the same level of theory to ascertain the nature of the stationary points as minima on the respective potential energy surfaces. The conformational space of flexible systems has first been searched manually and checked by xtb 6.0 program. Thermochemical corrections to 298.15 K have been calculated for all minima from unscaled vibrational frequencies obtained at this same level. The thermochemical corrections have been combined with single-point energies calculated at the SMD/B3LYP/6-311+G(d,p)//B3LYP/6-31G(d) level to yield free energy  $G_{298}$  at 298.15 K. The solvent effect was estimated by the IEFPCM method with radii and nonelectrostatic terms for SMD solvation model in dichloromethane ( $\epsilon = 8.93$ ).

**Table S7.** The total energies, enthalpies and free energies of all species in dichloromethane shown in Schemes 7a, 7c.

|                      | $E_{\text{tot}}$ | $H_{298}$    | $G_{298}$    |
|----------------------|------------------|--------------|--------------|
| <b>1a+NIS</b>        | -1558.078019     | -1557.652874 | -1557.755107 |
| <b>TS1</b>           | -1558.055398     | -1557.63175  | -1557.726428 |
| <b>INT1</b>          | -1558.076812     | -1557.650978 | -1557.740193 |
| <b>TS2</b>           | -1558.051763     | -1557.632819 | -1557.731027 |
| <b>TsH</b>           | -820.2882496     | -820.139865  | -820.1866468 |
| <b>INT2</b>          | -737.825833      | -737.551705  | -737.623488  |
| <b>I<sup>-</sup></b> | -11.563306       | -11.560946   | -11.580154   |
| <b>INT3</b>          | -749.396661      | -749.12022   | -749.201193  |
| <b>TS3</b>           | -749.3817925     | -749.1067992 | -749.1861772 |
| <b>INT4</b>          | -749.405308      | -749.128639  | -749.209718  |
| <b>INT1'</b>         | -1273.629836     | -1273.294532 | -1273.385194 |
| <b>TS1'</b>          | -1273.618541     | -1273.284287 | -1273.365089 |
| <b>INT2'</b>         | -1273.682114     | -1273.343481 | -1273.429288 |
| <b>TS2'</b>          | -1273.650194     | -1273.313635 | -1273.390803 |
| <b>INT3'</b>         | -1273.731928     | -1273.390522 | -1273.466922 |
| <b>TS3'</b>          | -1273.706467     | -1273.372462 | -1273.450496 |
| <b>INT4'</b>         | -1273.755657     | -1273.415319 | -1273.499759 |

## Archive entries

### 1a+NIS

Opt @ B3LYP/6-31G(d)

SCF Done: E(B3LYP) = -1558.078019a.u.

Zero-point correction = 0.393975Hartree/Particle

Sum of electronic and thermal Free Energies = -1557.755107a.u.

---

N 1.56217,1.362111,-0.046872  
C 2.705964,2.201257,-0.418152  
C 2.318108,3.638975,-0.742306  
S 1.8037,0.222429,1.170006  
O 2.646675,0.858896,2.184742  
O 0.468696,-0.293113,1.506987  
C 2.736396,-1.138038,0.460066  
C 4.133319,-1.102539,0.512313  
C 4.86347,-2.133077,-0.075795  
C 4.221957,-3.204073,-0.715396  
C 2.820439,-3.216667,-0.749224  
C 2.070018,-2.195473,-0.167203  
C 5.020665,-4.333934,-1.320895  
C 3.388104,4.439291,-1.455200  
C 1.163493,4.15861,-0.389059  
C 0.027586,4.673324,-0.055968  
C -1.389944,4.951193,-0.386216  
C -0.796536,5.371849,0.956405  
I -3.520698,-0.811767,-1.385803  
H 3.408205,2.209325,0.421191  
H 3.236635,1.76916,-1.284933  
H 4.63504,-0.290768,1.028161  
H 5.949661,-2.109055,-0.030966  
H 2.302169,-4.041182,-1.232416  
H 0.985981,-2.240413,-0.184135  
H 6.00462,-3.993591,-1.659984  
H 5.187276,-5.133917,-0.587247  
H 4.50017,-4.779938,-2.174702  
H 3.068029,5.471641,-1.615594  
H 4.320449,4.457056,-0.873075  
H 3.629035,3.996135,-2.431651  
H -1.607233,5.728803,-1.117173  
H -2.089061,4.116529,-0.398599  
H -1.093083,4.818293,1.845588  
H -0.614595,6.431855,1.127373



C 0.693918,0.953504,-1.156112  
H -0.200481,0.472097,-0.762026  
H 0.39534,1.856272,-1.692789  
H 1.202203,0.271822,-1.855607  
C -2.391798,-1.026737,2.815701  
C -1.70839,-2.297121,2.285301  
H -1.654095,-0.268685,3.097268  
H -3.060656,-1.18723,3.665314  
H -0.64162,-2.343316,2.507414  
H -2.179659,-3.216216,2.652415  
N -2.814844,-1.226639,0.51498  
C -1.896075,-2.253647,0.773091  
O -1.387921,-2.967394,-0.062769  
C -3.187321,-0.466969,1.641063  
O -3.969710,0.452043,1.637592

### TS1

Opt @ B3LYP/6-31G(d)

SCF Done: E(B3LYP) = -1558.055398a.u.

Zero-point correction = 0.394176Hartree/Particle

Sum of electronic and thermal Free Energies = -1557.726428a.u.

-----  
C -1.775465,1.150147,0.207488  
C -0.269438,1.41033,0.153173  
I 2.86208,0.200859,0.012134  
C -2.168754,-0.34,-1.715454  
C 0.187566,2.836778,0.225166  
C 0.46724,0.29817,0.100992  
C -0.195221,-0.952746,0.089408  
C -0.044289,-2.153823,0.957849  
C 0.083229,-2.26544,-0.555325  
N 5.16087,0.158109,-0.102746  
C 5.948883,1.290206,-0.029584  
C 7.426398,0.869848,-0.13969  
C 7.384325,-0.655071,-0.291285  
C 5.88564,-1.006872,-0.256882  
O 5.429789,-2.134098,-0.352072  
O 5.556527,2.437025,0.099687  
N -1.99824,-0.253182,-0.243328  
C -4.812228,-0.311077,0.218971  
C -5.263206,0.755891,1.003926  
C -6.462303,1.377239,0.66748  
C -7.222007,0.948034,-0.432759  
C -6.748925,-0.132095,-1.193089  
C -5.551758,-0.769819,-0.875794

C -8.535876,1.611245,-0.765447  
S -3.283504,-1.124225,0.646169  
O -2.992921,-0.891198,2.057009  
O -3.268758,-2.459209,0.048137  
H -2.145676,1.250572,1.232776  
H -2.343579,1.833401,-0.436152  
H -3.064753,0.203627,-2.031931  
H -2.238343,-1.384096,-2.015746  
H -1.284895,0.11471,-2.166226  
H -0.205574,3.427375,-0.614845  
H -0.165443,3.32198,1.146649  
H 1.277744,2.897244,0.207273  
H -0.923671,-2.610144,1.399283  
H 0.843635,-2.164539,1.584312  
H 1.059809,-2.374425,-1.020006  
H -0.729281,-2.793613,-1.045352  
H 7.877181,1.386651,-0.993511  
H 7.956806,1.21015,0.755958  
H 7.89116,-1.193616,0.516459  
H 7.810022,-1.017563,-1.232973  
H -4.696412,1.074652,1.871926  
H -6.819744,2.204714,1.274563  
H -7.329839,-0.485045,-2.040924  
H -5.20561,-1.622455,-1.449859  
H -9.351219,1.173,-0.175086  
H -8.512059,2.682477,-0.541085  
H -8.792838,1.486699,-1.821749

## INT1

Opt @ B3LYP/6-31G(d)

SCF Done: E(B3LYP) = -1558.076812a.u.

Zero-point correction = 0.396900Hartree/Particle

Sum of electronic and thermal Free Energies = -1557.740193a.u.

-----  
N -3.199615,-1.160023,-0.011127  
C -3.11547,-1.097837,1.495715  
C -1.634882,-0.972132,1.77072  
C -0.920743,-1.275981,0.675584  
C -1.836775,-1.664391,-0.438164  
C -4.389726,-1.914521,-0.489923  
C -1.463441,-1.756973,-1.897235  
C -1.69645,-3.020242,-1.119494  
C -1.164245,-0.556581,3.129138  
I 1.243356,-1.017502,0.353173

N 3.64598,-0.358098,-0.173803  
C 4.75565,-1.15877,0.002138  
C 6.03153,-0.391727,-0.411092  
C 5.509091,0.978026,-0.848983  
C 3.982404,0.868081,-0.655957  
O 3.208958,1.79828,-0.920357  
O 4.752526,-2.307378,0.420335  
C -2.135903,1.698942,-0.347784  
C -2.156212,2.490253,0.811585  
C -1.032801,3.253717,1.101707  
C 0.110948,3.216647,0.28333  
C 0.09479,2.415544,-0.873068  
C -1.025704,1.666299,-1.205177  
C 1.345429,4.006391,0.622731  
S -3.540893,0.717098,-0.71337  
O -4.683361,1.094225,0.11946  
O -3.67079,0.45069,-2.143124  
H -3.550627,-2.02745,1.890615  
H -3.73569,-0.269352,1.853372  
H -5.286441,-1.411372,-0.123993  
H -4.346093,-2.92917,-0.090676  
H -4.400403,-1.933216,-1.579582  
H -0.443019,-1.476824,-2.141273  
H -2.206021,-1.47943,-2.637673  
H -2.581004,-3.604338,-1.352664  
H -0.839462,-3.603714,-0.796838  
H -1.523097,0.45048,3.385538  
H -1.537306,-1.236122,3.908241  
H -0.073072,-0.552202,3.175305  
H 6.541056,-0.946832,-1.206273  
H 6.718485,-0.354049,0.441326  
H 5.887032,1.811663,-0.246184  
H 5.720936,1.222798,-1.89589  
H -3.033575,2.516181,1.447801  
H -1.033952,3.880002,1.989689  
H 1.002139,2.330268,-1.463057  
H -1.034864,1.0532,-2.098114  
H 1.367843,4.943339,0.049025  
H 1.376475,4.268056,1.685116  
H 2.238922,3.433969,0.351303

## TS2

Opt @ B3LYP/6-31G(d)

SCF Done: E(B3LYP) = -1558.051763a.u.

Zero-point correction = 0.388545Hartree/Particle

Sum of electronic and thermal Free Energies = -1557.731027a.u.

-----  
N -1.160879,-3.678937,0.294615  
C -1.669682,-2.938223,1.401466  
C -0.778616,-1.794314,1.597353  
C 0.177122,-1.780599,0.574926  
C -0.095647,-2.924372,-0.269937  
C -2.02071,-4.57738,-0.456091  
C 0.138839,-2.85006,-1.822618  
C 1.063344,-3.663762,-1.035835  
C -0.883832,-0.863637,2.760824  
I 1.892046,-0.361037,0.34998  
S -2.551461,-0.559878,-0.438058  
O -3.606507,-1.438431,0.27084  
H -2.68035,-2.399248,1.052922  
C -3.312901,1.082352,-0.391415  
O -2.263707,-0.89481,-1.869285  
C -4.172991,1.437339,0.647795  
C -4.675658,2.736808,0.686401  
C -4.319695,3.685675,-0.283688  
C -3.449193,3.294818,-1.311232  
C -2.932705,2.001452,-1.369385  
C -4.84006,5.101286,-0.209119  
H -1.979992,-3.543691,2.262963  
H -2.61098,-5.169436,0.248768  
H -2.705868,-4.030188,-1.117592  
H -1.415618,-5.267116,-1.051828  
H 0.445278,-1.867019,-2.162389  
H -0.638226,-3.324229,-2.412114  
H 0.958865,-4.744932,-1.038975  
H 2.052473,-3.278314,-0.807226  
H -1.928727,-0.700195,3.046486  
H -0.369995,-1.291746,3.632844  
H -0.413543,0.097488,2.540792  
H -4.465283,0.70356,1.390611  
H -5.361826,3.016811,1.481999  
H -3.168975,4.012268,-2.078412  
H -2.264317,1.701694,-2.169346  
H -4.143183,5.745864,0.34278  
H -4.963563,5.536009,-1.206447  
H -5.805201,5.14777,0.305589  
N 3.69488,1.182674,0.035046  
C 3.802603,2.390021,0.690085  
C 5.080105,3.115068,0.220748

C 5.694466,2.166836,-0.814216  
C 4.724804,0.969024,-0.854553  
O 4.863831,-0.0124,-1.570975  
O 3.018665,2.832486,1.517333  
H 5.722706,3.299099,1.08852  
H 4.804048,4.094687,-0.184095  
H 5.769711,2.596525,-1.818993  
H 6.693671,1.80646,-0.546834

### TsH

Opt @ B3LYP/6-31G(d)

SCF Done: E(B3LYP) = -820.2882496a.u.

Zero-point correction = 0.138006Hartree/Particle

Sum of electronic and thermal Free Energies = -820.1866468a.u.

-----

S -2.141367,0.197988 ,0.500172  
O -2.612191,-1.187909,0.208215  
O -2.488909,1.229288,-0.788787  
C -0.339472,0.149202,0.252693  
C 0.290668,-1.085068,0.113768  
C 1.678149,-1.129676,-0.029054  
C 2.445678,0.042082,-0.019263  
C 1.785443,1.272830,0.128408  
C 0.401716,1.3343790,0.268831  
C 3.950229,-0.012591,-0.139602  
H -0.310356,-1.989456,0.107040  
H 2.172735,-2.090810,-0.148324  
H 2.364784,2.193303,0.130143  
H -0.099076,2.293521,0.369627  
H 4.283326,-0.958310,-0.578307  
H 4.332825,0.804350,-0.761210  
H 4.428078,0.079359,0.844678  
H -2.143793,0.824268,-1.610045

### INT2

Opt @ B3LYP/6-31G(d)

SCF Done: E(B3LYP) = -737.825833a.u.

Zero-point correction = 0.254550Hartree/Particle

Sum of electronic and thermal Free Energies = -737.623488a.u.

-----

N -4.135332,-0.182618,0.000134  
C -3.999965,1.14504,-0.000487

C -2.647203,1.546584,-0.000726  
C -1.876441,0.389026,-0.000142  
C -2.80193,-0.742607,0.000389  
C -5.38651,-0.92106,0.000765  
C -2.504512,-2.059586,-0.738274  
C -2.504526,-2.058858,0.740367  
C -2.166338,2.9698,-0.001723  
I 0.345355,0.201429,-0.000118  
H -4.882103,1.778292,-0.000671  
H -6.215794,-0.211283,0.000272  
H -5.466494,-1.552404,-0.890349  
H -5.46641,-1.551076,0.892827  
H -3.339159,-2.515676,-1.26273  
H -1.554093,-2.077606,-1.26242  
H -1.554125,-2.076346,1.264559  
H -3.339184,-2.514409,1.265274  
H -3.002945,3.676309,0.004288  
H -1.540559,3.172,0.874079  
H -1.551275,3.174614,-0.884556  
N 2.737905,-0.067521,-0.000103  
C 3.644596,0.968465,0.001132  
C 5.077885,0.39683,0.001011  
C 4.877551,-1.121743,-0.000582  
C 3.345471,-1.301059,-0.001061  
O 2.77698,-2.385607,-0.00214  
O 3.37695,2.161687,0.002185  
H 5.610442,0.772706,0.881426  
H 5.611058,0.774501,-0.87826  
H 5.294591,-1.623081,-0.880878  
H 5.294303,-1.624937,0.878788

**I**

Opt @ B3LYP/6-31G(d)  
SCF Done: E(B3LYP) = -11.563306a.u.  
Zero-point correction = 0.000000Hartree/Particle  
Sum of electronic and thermal Free Energies = -11.580154a.u.

---

I 0.000000,0.000000,0.000000

**INT3**

Opt @ B3LYP/6-31G(d)  
SCF Done: E(B3LYP) = -749.396661a.u.  
Zero-point correction = 0.254538Hartree/Particle  
Sum of electronic and thermal Free Energies = -749.201193a.u.

---

N 2.161431,-1.783219,-0.674182  
C 1.56355,-2.896618,-0.27006  
C 0.1967,-2.689989,0.037672  
C -0.067183,-1.351583,-0.203494  
C 1.181153,-0.727822,-0.633229  
C 3.544648,-1.665926,-1.125315  
C 1.267621,0.475638,-1.587829  
C 1.589788,0.700511,-0.168782  
C -0.750148,-3.750171,0.522162  
I -2.005923,-0.372404,-0.034588  
H 2.125367,-3.823346,-0.213595  
H 4.039878,-2.624889,-0.958136  
H 3.569122,-1.432418,-2.195284  
H 4.084694,-0.878611,-0.57336  
H 2.091481,0.455778,-2.295795  
H 0.310041,0.801837,-1.983294  
H 0.847164,1.172942,0.466465  
H 2.635507,0.83319,0.122112  
H -0.251661,-4.722689,0.60108  
H -1.158837,-3.495539,1.506355  
H -1.604308,-3.857176,-0.155809  
N -4.30726,0.712573,0.104976  
C -5.353642,0.208402,0.833052  
C -6.595878,1.120773,0.684244  
C -6.123553,2.234379,-0.25082  
C -4.651528,1.863801,-0.555759  
O -3.929805,2.529809,-1.290539  
O -5.348643,-0.812305,1.51381  
H -6.900504,1.471929,1.676934

H -7.428506,0.528315,0.287571  
H -6.679889,2.291062,-1.193597  
H -6.153555,3.23462,0.196404  
I 5.494852,1.17752,0.472685

### TS3

Opt @ B3LYP/6-31G(d)

SCF Done: E(B3LYP) = -749.396661a.u.

Zero-point correction = 0.253259Hartree/Particle

Sum of electronic and thermal Free Energies = -749.201046a.u.

-----  
N -2.147824,2.685058,0.45645  
C -1.36345,3.680128,-0.01917  
C -0.072775,3.214108,-0.273661  
C -0.051439,1.849743,0.076451  
C -1.361281,1.509917,0.521312  
C -3.517148,2.824838,0.920965  
C -2.168696,0.089272,-0.233726  
C -1.868858,0.25436,1.183314  
C 1.060802,4.031709,-0.821029  
I 1.695908,0.555248,0.028847  
H -1.771132,4.674106,-0.163085  
H -3.911641,3.780229,0.56733  
H -4.147128,2.020975,0.527743  
H -3.569115,2.804663,2.016345  
H -3.095072,0.440019,-0.659238  
H -1.483567,-0.445281,-0.879321  
H -1.079929,-0.373422,1.591703  
H -2.713941,0.380624,1.856282  
H 0.751521,5.06773,-1.00093  
H 1.910931,4.044633,-0.129135  
H 1.431336,3.616502,-1.765287  
N 3.831963,-0.905576,0.02875  
C 4.726268,-0.964894,-1.00718  
C 5.882059,-1.939074,-0.665071  
C 5.536938,-2.436444,0.73809  
C 4.214849,-1.701986,1.076037  
O 3.629158,-1.841981,2.145373  
O 4.664211,-0.352093,-2.069151  
H 6.834341,-1.39912,-0.725962  
H 5.916646,-2.730427,-1.422962  
H 5.36861,-3.517966,0.799045  
H 6.287865,-2.188445,1.497424  
I -4.544385,-1.942958,-0.313642\



#### INT4

Opt @ B3LYP/6-31G(d)

SCF Done: E(B3LYP) = -749.405308a.u.

Zero-point correction = 0.254642Hartree/Particle

Sum of electronic and thermal Free Energies = -749.209718a.u.

---

N -2.519047, 2.741229, 0.299388  
C -1.751681, 3.838537, -0.02659  
C -0.432671, 3.45261, -0.149418  
C -0.389929, 2.050428, 0.12599  
C -1.680832, 1.635602, 0.413945  
C -3.928458, 2.78889, 0.624378  
C -2.568055, -0.4336, -0.577651  
C -2.209638, 0.268786, 0.729846  
C 0.721708, 4.339947, -0.510163  
I 1.374892, 0.811054, 0.092023  
H -2.210148, 4.812763, -0.142622  
H -4.325977, 3.761443, 0.322091  
H -4.487722, 2.012434, 0.08999  
H -4.108639, 2.661999, 1.70061  
H -3.278394, 0.124816, -1.186527  
H -1.686936, -0.691811, -1.16253  
H -1.441456, -0.307214, 1.25354  
H -3.086412, 0.318564, 1.385919  
H 0.389256, 5.371384, -0.680117  
H 1.480795, 4.355063, 0.281905  
H 1.229064, 3.992025, -1.418404  
N 3.655202, -0.761854, 0.048723  
C 4.58825, -0.745118, -0.949889  
C 5.740419, -1.744026, -0.648525  
C 5.343243, -2.354195, 0.692674  
C 4.000665, -1.647778, 1.030882  
O 3.376372, -1.894242, 2.061842  
O 4.573405, -0.05658, -1.969561  
H 6.691695, -1.198176, -0.628908  
H 5.808553, -2.469549, -1.468405  
H 5.179176, -3.438261, 0.661169  
H 6.060505, -2.165757, 1.500925  
I -3.608152, -2.397644, -0.247052

#### INT1'

Opt @ B3LYP/6-31G(d)

SCF Done: E(B3LYP) = -1273.629836a.u.

Zero-point correction = 0.310225Hartree/Particle  
Sum of electronic and thermal Free Energies = -1273.385194a.u.

-----

S 4.058511,2.891923,1.357998  
C 3.748336,1.073729,1.33139  
C 2.683948,0.685956,0.324034  
C 1.59868,2.373319,-1.342697  
C 0.528565,3.35288,-1.64772  
C 1.618167,3.035157,-2.667569  
C 2.297368,-0.79117,0.322113  
C 2.140166,1.541714,-0.516067  
H 5.024257,2.836171,2.301252  
H 4.68237,0.552054,1.094899  
H 3.436056,0.748254,2.3317  
H -0.476603,2.971634,-1.818622  
H 0.571623,4.317758,-1.144282  
H 2.386931,3.783418,-2.852443  
H 1.347133,2.442496,-3.539794  
H 1.932768,-1.072167,1.320883  
H 1.459505,-0.928911,-0.371367  
N -3.075612,0.076923,0.539203  
C -2.326196,1.142278,0.019886  
C -1.423266,1.637063,1.146653  
C -1.760226,0.761507,2.36541  
C -2.820044,-0.22952,1.887577  
I -4.455894,-0.968522,-0.593475  
O -3.349694,-1.108527,2.522374  
O -2.40038,1.565701,-1.110935  
H -0.381781,1.547867,0.821305  
H -1.619143,2.701773,1.306039  
H -2.173293,1.326538,3.206902  
H -0.904123,0.196924,2.747065  
C 3.438197,-1.724943,-0.059451  
C 3.844037,-2.754269,0.797946  
C 4.097213,-1.577876,-1.288858  
C 4.878552,-3.621916,0.438006  
H 3.342647,-2.881939,1.75513  
C 5.130331,-2.441311,-1.651428  
H 3.798438,-0.776292,-1.959946  
C 5.524928,-3.467718,-0.7885  
H 5.177926,-4.41582,1.117379  
H 5.628688,-2.313574,-2.608928  
H 6.330155,-4.140439,-1.071266

**TS1'**

Opt @ B3LYP/6-31G(d)

SCF Done: E(B3LYP) = -1273.618541a.u.

Zero-point correction = 0.311345Hartree/Particle

Sum of electronic and thermal Free Energies = -1273.365089a.u.

-----

C -3.338183,1.4052,-0.799831  
C -2.026389,0.610891,-0.742219  
C -2.130917,-0.818635,-1.229001  
C -0.942627,1.254811,-0.305355  
C -1.035658,2.622449,0.108419  
C -0.317625,3.380886,1.189236  
C -0.163048,3.793564,-0.256996  
I 1.265814,0.304408,-0.163423  
H -4.17321,0.891765,-0.313157  
H -3.644084,1.644748,-1.826036  
H -1.125016,-1.249369,-1.247706  
H -2.499307,-0.828848,-2.265176  
H -0.888187,4.037046,1.842392  
H 0.497481,2.850586,1.67372  
H 0.759734,3.550449,-0.775254  
H -0.63778,4.718608,-0.572306  
C 5.138102,-2.193718,-0.208159  
C 5.655338,-0.924681,0.479814  
H 5.217357,-3.094625,0.409278  
H 5.634387,-2.413653,-1.159226  
H 6.030425,-1.094133,1.494663  
H 6.451092,-0.415076,-0.073672  
N 3.351011,-0.642678,-0.016111  
C 3.649733,-1.909386,-0.480916  
O 2.875268,-2.68186,-1.017839  
C 4.429982,0.004084,0.553388  
O 4.426495,1.12349,1.037449  
S -3.073874,3.010893,0.041087  
H -3.29954,2.585819,1.30305  
C -3.053671,-1.670233,-0.367774  
C -4.26587,-2.161692,-0.867702  
C -2.70454,-1.968125,0.958322  
C -5.111482,-2.934933,-0.067034  
H -4.545201,-1.949667,-1.898015  
C -3.544748,-2.741392,1.758826  
H -1.762598,-1.598352,1.355971  
C -4.753109,-3.226046,1.249274  
H -6.0454,-3.312489,-0.475382

H -3.253387,-2.972237,2.78022  
H -5.405822,-3.831058,1.872826

**INT2'**

Opt @ B3LYP/6-31G(d)

SCF Done: E(B3LYP) = -1273.682114a.u.

Zero-point correction = 0.315190Hartree/Particle

Sum of electronic and thermal Free Energies = -1273.429288a.u.

-----  
S -4.157832,-2.553241,0.669711  
C -3.655532,-0.861476,1.214307  
C -2.455525,-0.478478,0.37643  
C -1.778297,0.850268,0.621741  
C -2.095552,-1.367021,-0.558912  
C -2.90108,-2.607006,-0.666705  
C -3.233232,-3.212782,-2.015488  
C -2.286416,-3.92663,-1.082188  
H -3.414899,-0.877598,2.284925  
H -4.483024,-0.15619,1.074449  
H -1.426784,0.895882,1.66283  
H -0.886971,0.910392,-0.015198  
H -1.251525,-1.210167,-1.227424  
H -2.827886,-2.727943,-2.900857  
H -4.230489,-3.624282,-2.146321  
H -2.639604,-4.824888,-0.582132  
H -1.225723,-3.938346,-1.325059  
N 3.053622,-0.51174,0.214698  
C 1.839398,-0.99116,-0.290277  
C 1.476167,-2.227446,0.528268  
C 2.582864,-2.365827,1.587005  
C 3.576001,-1.240946,1.299703  
I 4.003997,1.15362,-0.562931  
O 4.607137,-0.999508,1.876823  
O 1.214307,-0.501848,-1.204764  
H 0.47375,-2.086736,0.943823  
H 1.422032,-3.083575,-0.152082  
H 3.115498,-3.320506,1.545101  
H 2.217629,-2.246024,2.611929  
C -2.67664,2.054151,0.365731  
C -2.92607,2.995352,1.371214  
C -3.263778,2.248186,-0.892957  
C -3.736916,4.107088,1.128667  
H -2.478166,2.859477,2.353472  
C -4.073712,3.356292,-1.139407

H -3.085592,1.520293,-1.680819  
C -4.313402,4.290956,-0.128311  
H -3.917588,4.826822,1.92298  
H -4.518752,3.491012,-2.121948  
H -4.944991,5.154285,-0.320013

## TS2'

Opt @ B3LYP/6-31G(d)

SCF Done: E(B3LYP) = -1273.33181495a.u.

Zero-point correction = 0.314033Hartree/Particle

Sum of electronic and thermal Free Energies = -1273.072436a.u.

-----  
S -3.7821313398,-3.1321385918,0.2007489455  
C -2.6549494554,-1.6839463302,0.1403372394  
C -2.6278061279,-1.2337504719,-1.2895786011  
C -1.7574325946,-0.0721223616,-1.6860181621  
C -3.3228525619,-2.0290669942,-2.1380812123  
C -3.9280838278,-3.183030819,-1.5298553792  
C -4.6696715269,-4.2317417268,-2.2342616703  
C -3.3584204707,-4.9791560192,-2.4569034321  
H -1.640536306,-1.9676169208,0.4522965536  
H -3.0320005551,-0.9108249647,0.817049265  
H -0.7278900588,-0.4569581879,-1.6655761491  
H -1.9822477186,0.2083929004,-2.7215983932  
H -3.3656963596,-1.8798896228,-3.2124330752  
H -5.1439444151,-3.876548856,-3.152606985  
H -5.3983562034,-4.7649462356,-1.6195595145  
H -3.3072769145,-5.9018536416,-1.8852308909  
H -3.0999380194,-5.0836486786,-3.5073936937  
N 1.1997546174,-3.8504218482,-1.142380932  
C 1.451601399,-2.6986064284,-0.4481272778  
C 2.956129827,-2.598919593,-0.1628674018  
C 3.5504791593,-3.8671991516,-0.7876198661  
C 2.3442034598,-4.6018457392,-1.3961516348  
I -0.911950104,-4.4221863548,-1.8000636364  
O 2.3860170729,-5.655762881,-1.996173186  
O 0.6241001686,-1.8584846053,-0.0959910234  
H 3.3379319852,-1.6703397899,-0.6003854692  
H 3.1055650122,-2.5268582738,0.9195625674  
H 4.0364271371,-4.5281333749,-0.0627514329  
H 4.2793877395,-3.668700196,-1.5798209107  
C -1.8483736426,1.1351847785,-0.7668281697  
C -0.8934584582,1.3291984693,0.2407757653  
C -2.8910743517,2.0613905667,-0.9028266609  
C -0.982858415,2.4312472032,1.0944949002

H -0.0849789325,0.6101058165,0.3513436547  
C -2.9790084102,3.1633167597,-0.0510076828  
H -3.6354999512,1.9215387282,-1.6841334982  
C -2.0238317174,3.3505534424,0.9510629937  
H -0.2345515348,2.572696451,1.8699717676  
H -3.7902671548,3.8765391052,-0.1716051047  
H -2.0896716601,4.2096212474,1.6133797339

### INT3'

Opt @ B3LYP/6-31G(d)

SCF Done: E(B3LYP) = -1273.42187615 a.u.

Zero-point correction = 0.319756 Hartree/Particle

Sum of electronic and thermal Free Energies = -1273.156870 a.u.

-----  
S -2.6154103326,-2.5804373944,0.8156167995  
C -2.0152010275,-0.9493176506,1.4254627454  
C -1.0867360424,-0.3557801379,0.3412308507  
C -0.9931546241,1.2005199028,0.4339785933  
C -1.6624129271,-0.8891336799,-0.9620420642  
C -2.3878976509,-2.0109042225,-0.8603203565  
C -3.0081551882,-2.7790178778,-1.9924064637  
C -2.6173819064,-4.2524312965,-2.0800006131  
H -1.5339792232,-1.0597442256,2.3929892679  
H -2.8878412406,-0.2984792227,1.509301256  
H -0.5512092934,1.4393010989,1.4086971767  
H -0.2782876731,1.5166649814,-0.3329971114  
H -1.4135878286,-0.4373370867,-1.9124638027  
H -2.7877934641,-2.2735556869,-2.9381539946  
H -4.1034265783,-2.7688772929,-1.8688866487  
H -2.728419817,-4.7775751644,-1.1314835644  
H -3.1798910652,-4.7697670402,-2.8561513235  
N 0.3281726142,-0.8685355179,0.481300708  
C 1.2232176773,-0.8429040645,-0.6033374955  
C 2.5273165441,-1.5007626837,-0.1733230643  
C 2.3802615383,-1.7104651468,1.335578352  
C 0.9780247928,-1.2135687313,1.6760483721  
I -0.5033564397,-4.5816306466,-2.6470730006  
O 0.526408154,-1.1166957831,2.8004043718  
O 0.9927160926,-0.3527889035,-1.689398387  
H 2.6356230306,-2.4365720776,-0.731579492  
H 3.3634855861,-0.8553409981,-0.4562466643  
H 3.1023134173,-1.1436525225,1.9309718467  
H 2.4597418918,-2.7574129769,1.6448045921  
C -2.290155363,1.9627407723,0.2606014298  
C -3.0322646496,2.3836532972,1.373702653

C -2.7696424369,2.286463746,-1.017348523  
C -4.2256590224,3.0916127537,1.2174834506  
H -2.6658707913,2.1627600194,2.3739455682  
C -3.9613252281,2.993839104,-1.1784430974  
H -2.197611816,1.9914184019,-1.8933198129  
C -4.6957939747,3.3963762212,-0.0607313831  
H -4.7826879673,3.409917524,2.094752361  
H -4.3127461337,3.2371060513,-2.1777844987  
H -5.6223392034,3.9502681574,-0.1854426229

### TS3'

Opt @ B3LYP/6-31G(d)

SCF Done: E(B3LYP) = -1273.39066515 a.u.

Zero-point correction = 0.311719 Hartree/Particle

Sum of electronic and thermal Free Energies = -1273.134694 a.u.

-----  
S,0,1.0998705263,0.8744672144,2.9769269029  
C -0.3331268693,1.6935007589,2.3737369128  
C -1.2070443256,0.7804285833,1.7512683642  
C -2.5540090419,1.2178732795,1.2170691232  
C -0.6060712108,-0.4888976898,1.5951114379  
C 0.6446471407,-0.5876919475,2.1788635331  
C 1.6282429699,-1.7194818384,2.0691674523  
C 2.5611767439,-1.6068461264,0.8544488819  
H -0.6413209111,2.622762866,2.8433835774  
H -3.1931982182,1.4625852471,2.0778379922  
H -2.3993974158,2.1558497111,0.6662872228  
H -1.0597799828,-1.2986031348,1.0371843083  
H 1.0971520019,-2.6768755515,2.0596811647  
H 2.2756106231,-1.7274051668,2.9574882712  
H 2.8966030081,-0.5845898007,0.6743175651  
H 3.4076563501,-2.2866100566,0.9449896039  
N 0.7430292249,2.5678476693,-0.1741953343  
C -0.039633498,3.1714927198,-1.1277847968  
C 0.8261773611,3.4648350737,-2.3618544306  
C 2.2040973726,2.88365134,-2.0090046156  
C 2.0279470957,2.3078150016,-0.5955719694  
I 1.6063411688,-2.2101556997,-1.0482163741  
O 2.8833055508,1.7085676085,0.0407476101  
O -1.233071642,3.4240415341,-1.0163088821  
H 0.3640569054,3.0025008777,-3.2397981947  
H 0.8367916182,4.5456548056,-2.5380294001  
H 3.0059636822,3.6291206071,-1.9932400901  
H 2.5262578497,2.0803143877,-2.679004432  
C -3.2542353717,0.2162452755,0.3209508602

C -3.9851921469,-0.8506527072,0.861720484  
C -3.1796539267,0.3471856952,-1.072224743  
C -4.6218294971,-1.7732102548,0.029834009  
H -4.0613507429,-0.9564014851,1.9422273626  
C -3.8178951369,-0.5737275867,-1.9054436903  
H -2.6294480397,1.1834802474,-1.4962228344  
C -4.5381390326,-1.6370917296,-1.3576989346  
H -5.1874717058,-2.5931903257,0.4647577507  
H -3.7554997474,-0.4568560741,-2.9841992828  
H -5.0361677328,-2.3522809262,-2.0069533383  
H 0.2087390026,2.1723305978,1.0785849528

#### INT4'

Opt @ B3LYP/6-31G(d)

SCF Done: E(B3LYP) = -1273.43625870 a.u.

Zero-point correction = 0.317087 Hartree/Particle

Sum of electronic and thermal Free Energies = -1273.180361 a.u.

-----  
S -0.2581231778,-1.5056150896,-1.3421239879  
C 0.979854784,-0.3449139768,-0.9627634331  
C 1.1517793816,-0.1915832778,0.3903406121  
C 2.2040990278,0.6988728041,1.0232786583  
C 0.2506673313,-1.0254400486,1.1335257106  
C -0.5710123732,-1.7936928536,0.3547272932  
C -1.6225483764,-2.7668396965,0.805560693  
C -3.0504164005,-2.4722488034,0.3473783145  
H 1.5248048866,0.1248021386,-1.7716720506  
H 3.070827166,0.0807077509,1.2951556458  
H 2.5668355039,1.4075063442,0.267409486  
H 0.210329325,-1.0330764161,2.2177291185  
H -1.5887870287,-2.835954465,1.8978876886  
H -1.3880272523,-3.7737536795,0.4234152932  
H -3.1222690857,-2.3186990169,-0.7292984893  
H -3.7395846561,-3.2588547112,0.6540139961  
N -0.6310559268,2.3861128309,-1.9434681164  
C -1.1747945337,3.5984340083,-1.5362244071  
C -1.5921631233,4.3510463698,-2.8016094869  
C -1.1792340142,3.439449622,-3.9717176721  
C -0.5594388249,2.2016326384,-3.3196775584  
I -3.8977009382,-0.6279862386,1.2226164485  
O -0.0797359275,1.2333344721,-3.8716765285  
O -1.2780688296,3.9690722867,-0.3859223489  
H -2.6695417965,4.5390212173,-2.7569123188  
H -1.0975507283,5.3270492719,-2.8111304518  
H -0.4399559571,3.8936745934,-4.6387411698



H -2.0205776866, 3.1229077985, -4.596060236  
C 1.7396262871, 1.4513715645, 2.260211852  
C 2.3028117453, 1.1720062325, 3.5115932558  
C 0.7449065865, 2.43727554, 2.1777327593  
C 1.8883628105, 1.8584055838, 4.6559137448  
H 3.0775452802, 0.4119915197, 3.5910228807  
C 0.3301029094, 3.1245371396, 3.3182213008  
H 0.2823591294, 2.6793429966, 1.2241214033  
C 0.8996850005, 2.8379504578, 4.5617925921  
H 2.3397998424, 1.6269001166, 5.6173360344  
H -0.4406923357, 3.885390334, 3.2303477369  
H 0.5748669361, 3.3747142595, 5.4492849453  
H -0.2967551304, 1.6801910319, -1.2902140585

## 11. X-Ray structures

### (a) **3ga**

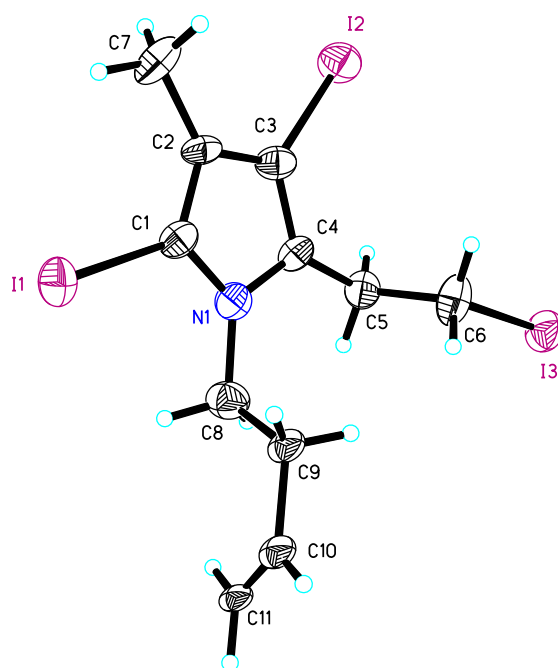

The crystal data of **3ga** have been deposited in CCDC with number 2083431. Empirical Formula:  $C_{11}H_{14}I_3N$ ; Formula Weight: 540.93; Crystal Color, Habit: colorless, Crystal Dimensions: 0.170 x 0.140 x 0.060 mm<sup>3</sup>; Crystal System: Triclinic; Lattice Parameters:  $a = 8.6649(8) \text{ \AA}$ ,  $b = 8.8569(8) \text{ \AA}$ ,  $c = 9.8661(9) \text{ \AA}$ ,  $\alpha = 84.893(3)^\circ$ ,  $\beta = 88.222(3)^\circ$ ,  $\gamma = 84.477(3)^\circ$ ,  $V = 750.47(12) \text{ \AA}^3$ ; Space group: P  $\bar{1}$ ;  $Z = 2$ ;  $D_{calc} = 2.394 \text{ g/cm}^3$ ;  $F_{000} = 492$ ; Final R indices [ $I > 2\sigma(I)$ ]  $R1 = 0.0798$ ,  $wR2 = 0.2460$ .

(b) **3oa'**

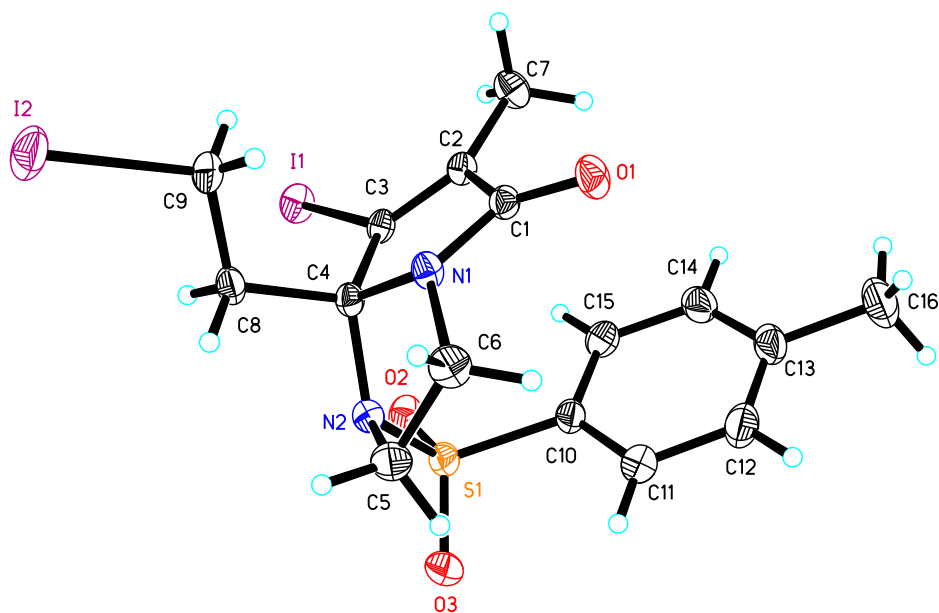

The crystal data of **3oa'** have been deposited in CCDC with number 2142800. Empirical Formula:  $C_{16}H_{18}I_2N_2O_3S$ ; Formula Weight: 572.18; Crystal Color, Habit: colorless, Crystal Dimensions: 0.200 x 0.150 x 0.120 mm<sup>3</sup>; Crystal System: Monoclinic; Lattice Parameters:  $a = 11.5550(4)$  Å,  $b = 8.3352(2)$  Å,  $c = 20.4748(6)$  Å,  $\alpha = 90^\circ$ ,  $\beta = 105.3480(10)^\circ$ ,  $\gamma = 90^\circ$ ,  $V = 1901.66(10)$  Å<sup>3</sup>; Space group: P 21/c; Z = 4; D<sub>calc</sub> = 1.999 g/cm<sup>3</sup>; F<sub>000</sub> = 1096; Final R indices [ $I > 2\sigma(I)$ ] R1 = 0.0245, wR2 = 0.0571.

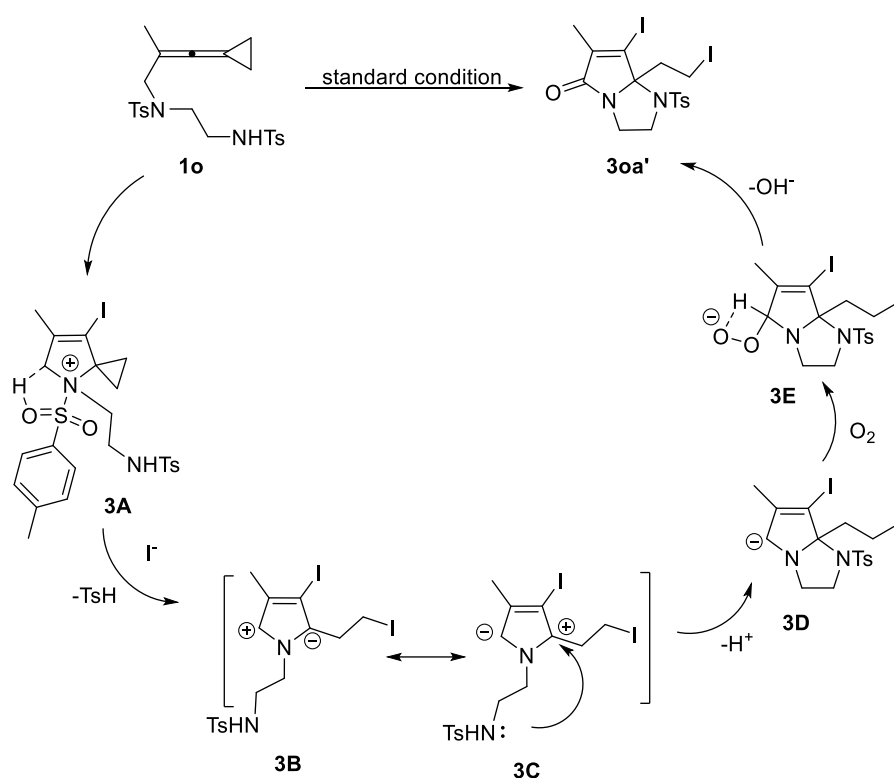

**Figure S5.** Proposed reaction mechanism of **3oa'**

According to Scheme 7a in the main text, intermediate **3A** is firstly generated through the cyclization reaction. The Ts moiety in intermediate **3A** promotes subsequent dehydrogenation to afford intermediate **3B**. The NHTs moiety in intermediate **3C**, which is the resonance structure of intermediate **3B** undergoes the intramolecular nucleophilic attack to give the cyclized intermediate **3D**. Intermediate **3D** reacts with molecular oxygen under ambient atmosphere to obtain intermediate **3E**. Finally the hydroxide anion in intermediate **3E** is released to deliver the corresponding product **3oa'**. This result indicates that the zwitterionic intermediate **1D** shown in Scheme 7b might be indeed involved in the reaction system.

## 12. References

- [1] K. H. Rui, S. Yang, Y. Wei, M. Shi, *Org. Chem. Front.*, **2019**, *6*, 2506-2513.
- [2] M. Z. Miao, X. Xu, L. J. Xu, H. J. Ren, *Eur. J. Org. Chem.*, **2014**, *27*, 5896-5900.
- [3] N. Miyaura, K. J. Yamada, A. Suzuki, *Tetrahedron Lett.* **1979**, *20*, 3437-3440.
- [4] E. C. Taylor, W. B. Young, *J. Org. Chem.*, **1995**, *24*, 7947-7952.
- [5] E. R. Wearing, D. E. Blackmun, M. R. Becker, C. S. Schindler, *J. Am. Chem. Soc.* **2021**, *39*, 16235-16242.
- [6] L. L. Liao, Z. H. Wang, K. G. Cao, G. Q. Sun, W. Zhang, C. K. Ran, Y. W. Li, L. Chen, G. M. Cao, D. G. Yu, *J. Am. Chem. Soc.*, **2022**, *144*, 2062-2068.
- [7] W. Yuan, X. Dong, M. Shi, P. McDowell, G. G. Li, *Org. Lett.*, **2012**, *14*, 5582-5585.
- [8] K. H. Rui, M. Shi, *Org. Chem. Front.*, **2019**, *6*, 1816-1820.
- [9] Z. Meng, X. Y. Zhang, M. Shi, *Org. Chem. Front.*, **2021**, *8*, 3796-3801.
- [10] S. Yang, K. H. Rui, X. Y. Tang, Q. Xu, M. Shi, *J. Am. Chem. Soc.*, **2017**, *16*, 5957-5964.
- [11] C. Ning, K. H. Rui, Y. Wei, M. Shi, *Chem. Sci.*, **2022**, *13*, 7310-7317.
